# Supplementary material for: Cu-based carbene involved in a radical process: a new crossover reaction to construct γ-peroxy esters and 1,4-dicarbonyl compounds
Source: Royal Society of Chemistry journal article supplement (doi:10.1039/c5cc05183e), 2015-01-01
Supplement: c5cc05183e1.pdf [file c5cc05183e1.pdf]

## SUPPORTING INFORMATION

# **Cu-Based Carbene Involved in a Radical Process: A New Crossover Reaction to Construct $\gamma$ -Peroxy Ester and 1,4-Dicarbonyl Compounds**

Jiewen Jiang,<sup>a,§</sup> Jiajun Liu,<sup>a,§</sup> Ling Yang,<sup>a</sup> Ying Shao,<sup>b</sup> Jiang Cheng,<sup>b</sup> Xiaoguang Bao<sup>\*,a</sup>  
and Xiaobing Wan<sup>\*,a</sup>

<sup>a</sup>Key Laboratory of Organic Synthesis of Jiangsu Province, College of Chemistry, Chemical  
Engineering and Materials Science, Soochow University, Suzhou 215123, P. R. China

<sup>b</sup>Jiangsu Key Laboratory of Advanced Catalytic Materials and Technology, Changzhou University,  
Changzhou, 213164, China

Email: [xgbao@suda.edu.cn](mailto:xgbao@suda.edu.cn), [wanxb@suda.edu.cn](mailto:wanxb@suda.edu.cn)

### **List of contents**

|                                                  |                  |
|--------------------------------------------------|------------------|
| <b>General Information .....</b>                 | <b>S2</b>        |
| <b>General procedures for reactions .....</b>    | <b>S2</b>        |
| <b>Optimization of Reaction Conditions.....</b>  | <b>S3-S4</b>     |
| <b>Computational Methods .....</b>               | <b>S4</b>        |
| <b>Computational Results and Discussion.....</b> | <b>S5-S10</b>    |
| <b>Trapping of Radicals .....</b>                | <b>S11-S15</b>   |
| <b>Compound characterizations.....</b>           | <b>S16-S27</b>   |
| <b>NMR Spectroscopic Data for Products .....</b> | <b>S27-S92</b>   |
| <b>MS Spectroscopic Data for Products.....</b>   | <b>S93-S108</b>  |
| <b>Cartesian Coordinates and Energies.....</b>   | <b>S109-S136</b> |

## General Information

All manipulations were carried out under air atmosphere. Column chromatography was generally performed on silica gel (300-400 mesh) and reactions were monitored by thin layer chromatography (TLC) using UV light to visualize the course of the reactions. The  $^1\text{H}$  (400MHz) and  $^{13}\text{C}$  NMR (100MHz) data were recorded with  $\text{CDCl}_3$  as solvent. The chemical shifts ( $\delta$ ) are reported in ppm and coupling constants ( $J$ ) in Hz.  $^1\text{H}$  NMR spectra was recorded with tetramethylsilane ( $\delta = 0.00$  ppm) as internal reference;  $^{13}\text{C}$  NMR spectra was recorded with  $\text{CDCl}_3$  ( $\delta = 77.00$  ppm) as internal reference.

## General procedures for reactions

The synthesis of  $\gamma$ -peroxy esters: Cupric nitrate trihydrate (0.05 mmol), DABCO (1.0 mmol) was added to test tube. Isopropanol (3.0 mL), alkenes (0.5 mmol), diazoacetic ester (1.0 mmol) and *tert*-butyl hydroperoxide (TBHP, 1.45 mmol, 0.20 mL, 70% solution in water) were added via syringe. The reaction mixture was stirred at 70  $^\circ\text{C}$  for 1 h. Removal of solvent followed by flash column chromatographic purification afforded products using petroleum and ethyl acetate.

The synthesis of 1,4-dicarbonyl compounds: Cupric acetylacetonate (0.05 mmol), DABCO (1.5 mmol) was added to test tube. Isopropanol (2.0 mL), alkenes (0.5 mmol), diazoacetic ester (1.0 mmol) and *tert*-butyl hydroperoxide (TBHP, 1.45 mmol, 0.20 mL, 70% solution in water) were added via syringe. The reaction mixture was stirred at 70  $^\circ\text{C}$  for 8 h. Removal of solvent followed by flash column chromatographic purification afforded products using petroleum and ethyl acetate.

## Optimization of Reaction Conditions

**Table S1.** Optimization of Reaction Conditions of  $\gamma$ -peroxy ester<sup>a</sup>

Reaction scheme: Styrene (**1a**) + Ethyl diazoacetate (**2a**)  $\xrightarrow[\text{Base, 1 h, 70 }^\circ\text{C}]{\text{TBHP 200 } \mu\text{L, Catalyst, Solvent}}$  Ethyl 3-phenylpropanoate (**3a**)

| Entry | Solvent (3 mL) | Catalyst (10 mol%)                                   | Base (2 eq) | Yield <sup>b</sup> |
|-------|----------------|------------------------------------------------------|-------------|--------------------|
| 1     | <i>i</i> -PrOH | Cu(NO <sub>3</sub> ) <sub>2</sub> ·3H <sub>2</sub> O | DABCO       | 76%                |
| 2     | <i>i</i> -PrOH | Cu(acac) <sub>2</sub>                                | DABCO       | 61%                |
| 3     | <i>i</i> -PrOH | CuI                                                  | DABCO       | 45%                |
| 4     | <i>i</i> -PrOH | Co(acac) <sub>2</sub>                                | DABCO       | 40%                |
| 5     | <i>i</i> -PrOH | Pd(OAc) <sub>2</sub>                                 | DABCO       | 10%                |
| 6     | EtOH           | Cu(NO <sub>3</sub> ) <sub>2</sub> ·3H <sub>2</sub> O | DABCO       | 30%                |
| 7     | <i>i</i> -PrOH | Cu(NO <sub>3</sub> ) <sub>2</sub> ·3H <sub>2</sub> O | DBU         | <5%                |
| 8     | <i>i</i> -PrOH | Cu(NO <sub>3</sub> ) <sub>2</sub> ·3H <sub>2</sub> O | DMAP        | <5%                |
| 9     | <i>i</i> -PrOH | Cu(NO <sub>3</sub> ) <sub>2</sub> ·3H <sub>2</sub> O | NaOAc       | <5%                |
| 10    | <i>i</i> -PrOH | Cu(NO <sub>3</sub> ) <sub>2</sub> ·3H <sub>2</sub> O | DABCO       | 60% <sup>c</sup>   |
| 11    | <i>i</i> -PrOH | —                                                    | DABCO       | < 5%               |
| 12    | <i>i</i> -PrOH | Bu <sub>4</sub> NI                                   | DABCO       | < 5%               |

<sup>a</sup> 0.5 mmol of **1a**, 1.0 mmol of **2a**, 0.05 mmol of catalyst, 1.46 mmol of TBHP, 1.0 mmol of base in 3.0 mL solvent was stirred at 70 °C for 1 h. <sup>b</sup> Isolated yield. <sup>c</sup> 15 mmol of **1a**, 30 mmol of **2a**, 1.5 mmol of catalyst, 43.86 mmol of TBHP, 30 mmol of base in 90 mL solvent was stirred at 70 °C for 1.5 h.

**Table S2.** Optimization of Reaction Conditions of 1,4-Dicarbonyl compound<sup>a</sup>

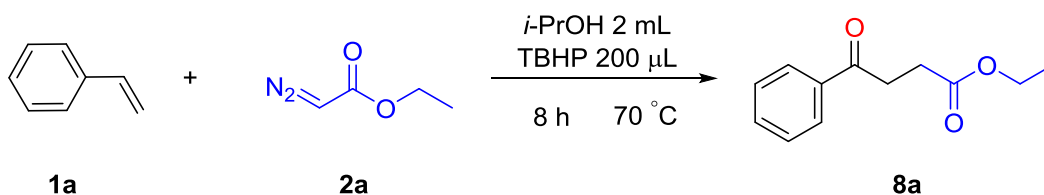

| Entry | Catalyst (10 mol%)                                    | Base (3 eq)                     | Yield <sup>b</sup> |
|-------|-------------------------------------------------------|---------------------------------|--------------------|
| 1     | Cu(acac) <sub>2</sub>                                 | DABCO                           | 72%                |
| 2     | Co(acac) <sub>3</sub>                                 | DABCO                           | 53%                |
| 3     | Pd(OAc) <sub>2</sub>                                  | DABCO                           | <5%                |
| 4     | AgNO <sub>3</sub>                                     | DABCO                           | 12%                |
| 5     | MnO <sub>2</sub>                                      | DABCO                           | 30%                |
| 6     | Mn(acac) <sub>2</sub>                                 | DABCO                           | 56%                |
| 7     | Fe(acac) <sub>2</sub>                                 | DABCO                           | 41%                |
| 8     | Cu(NO <sub>3</sub> ) <sub>2</sub> · 3H <sub>2</sub> O | DABCO                           | 53% <sup>c</sup>   |
| 9     | CuI                                                   | DABCO                           | 38%                |
| 10    | Cu(acac) <sub>2</sub>                                 | Cs <sub>2</sub> CO <sub>3</sub> | <5%                |
| 11    | Cu(acac) <sub>2</sub>                                 | NaOAc                           | <5%                |
| 12    | Cu(acac) <sub>2</sub>                                 | NaHCO <sub>3</sub>              | <5%                |

<sup>a</sup> 0.5 mmol of **1a**, 1.0 mmol of **2a**, 0.05 mmol of catalyst, 1.46 mmol of TBHP, 1.5 mmol of base in 2.0 mL *i*-PrOH was stirred at 70 °C for 8 h. <sup>b</sup> Isolated yield. <sup>c</sup> 0.5 mmol of **1a**, 1.0 mmol of **2a**, 0.05 mmol of catalyst, 1.46 mmol of oxidant, 1.0 mmol of base in 3.0 mL *i*-PrOH was stirred at 70 °C for 1 h.

## Computational Methods

The geometries of all stationary points were optimized using the ωB97XD density functional method<sup>1</sup> with the 6-31G(d) basis set<sup>2</sup> for all the atoms. For open-shell models, unrestricted DFT calculations were performed. Vibrational frequency analyses at the same level of theory were performed on all optimized structures to characterize stationary points as local minima or transition states. Transition states were verified to have one imaginary vibrational frequency and were connected to appropriate reactant and product by optimizations along the reaction coordinate. The Gibbs free energies for all species were obtained at 343.15K (70 °C) and 1 atm at optimized structures. Unless otherwise specified, the Gibbs free energy was used in the present discussions. The Gaussian 09 suite of programs<sup>3</sup> was used for all the calculations.

## Computational Results and Discussion

### The activation of **2a** by a Cu(II) species.

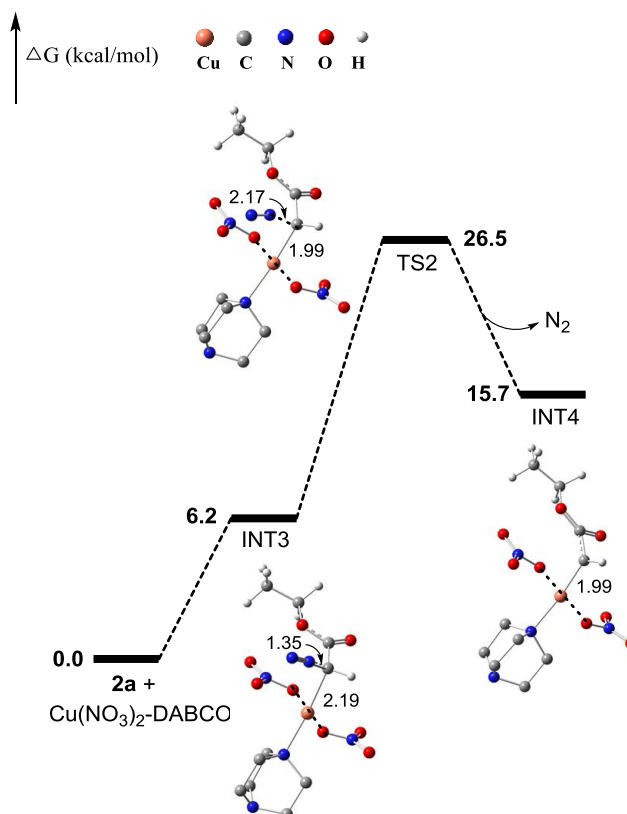

**Figure S1.** Free energy profile for the activation of **2a** by the Cu(II) species, Cu(NO<sub>3</sub>)<sub>2</sub>-DABCO complex. Bond lengths are shown in Å.

### INT2 induced hydrogen abstraction reactions

The predicted energy barrier for the **INT2** induced hydrogen abstraction from the secondary carbon of *i*-PrOH is 6 kcal/mol relative to the separated **INT2** and *i*-PrOH (Figure S2). The corresponding energy barriers of the hydrogen abstractions from the hydroxyl group of *i*-PrOH and the hydroperoxyl group of TBHP, however, are 8.5 kcal/mol and 8.9 kcal/mol higher in energy (Figure S3 and S4), respectively, than that of the hydrogen abstraction from the secondary carbon of *i*-PrOH. Therefore, abstracting the hydrogen attached to the secondary carbon of *i*-PrOH is favorable induced by **INT2**.

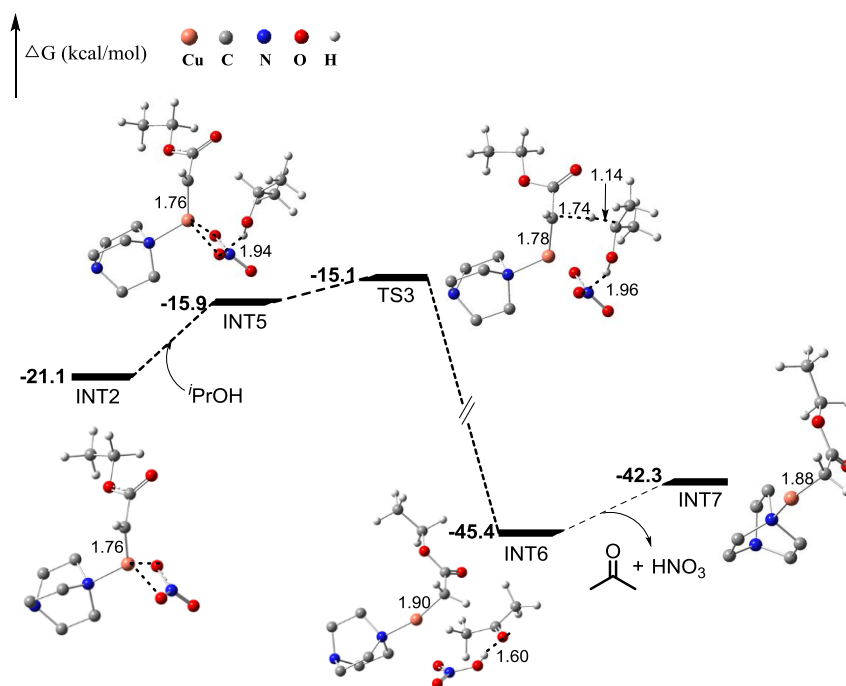

**Figure S2.** Free energy profile for the **INT2** induced hydrogen abstraction from the secondary carbon of *i*-PrOH and the subsequent conversion to afford **INT7**. Bond lengths are shown in Å.

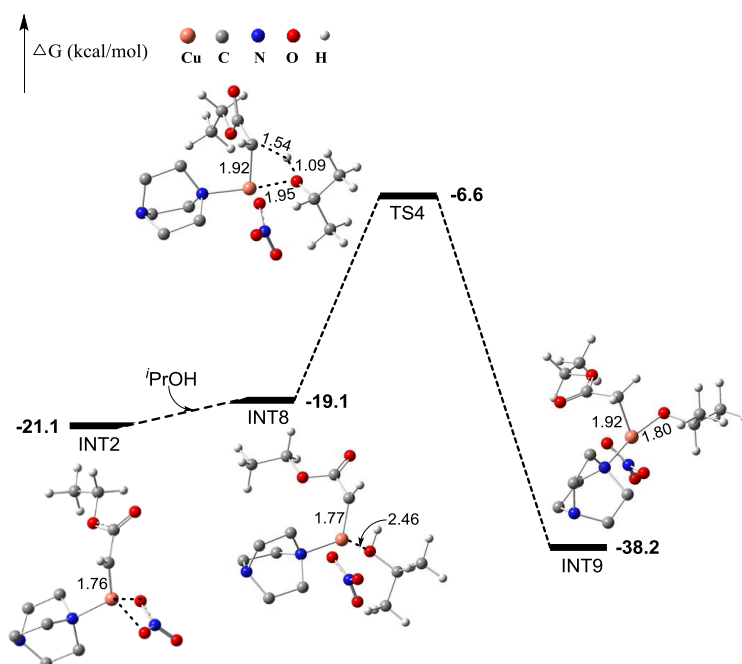

**Figure S3.** Free energy profile for the **INT2** induced hydrogen abstraction from the hydroxyl group of *i*-PrOH. Bond lengths are shown in Å.

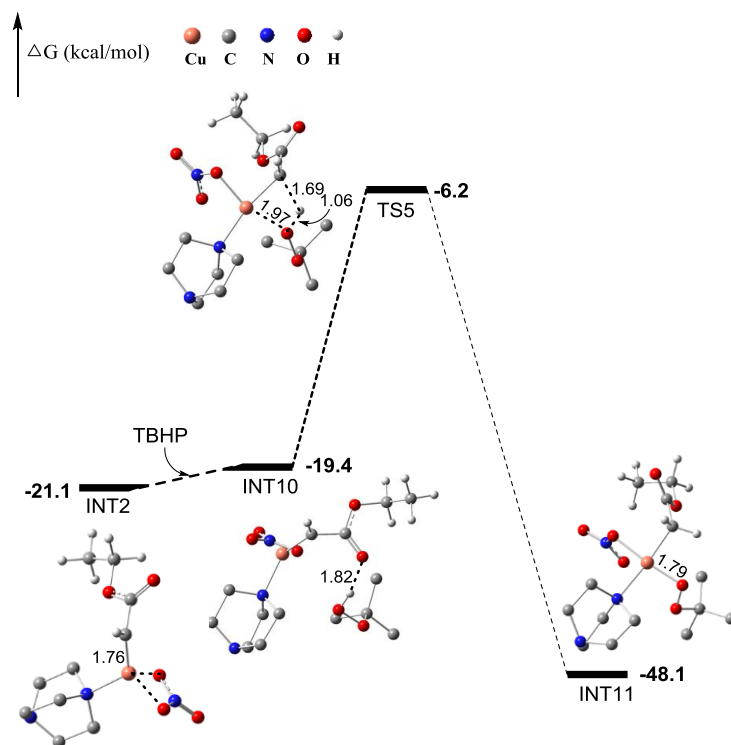

**Figure S4.** Free energy profile for the **INT2** induced hydrogen abstraction from the hydroperoxyl group of TBHP. Bond lengths are shown in Å.

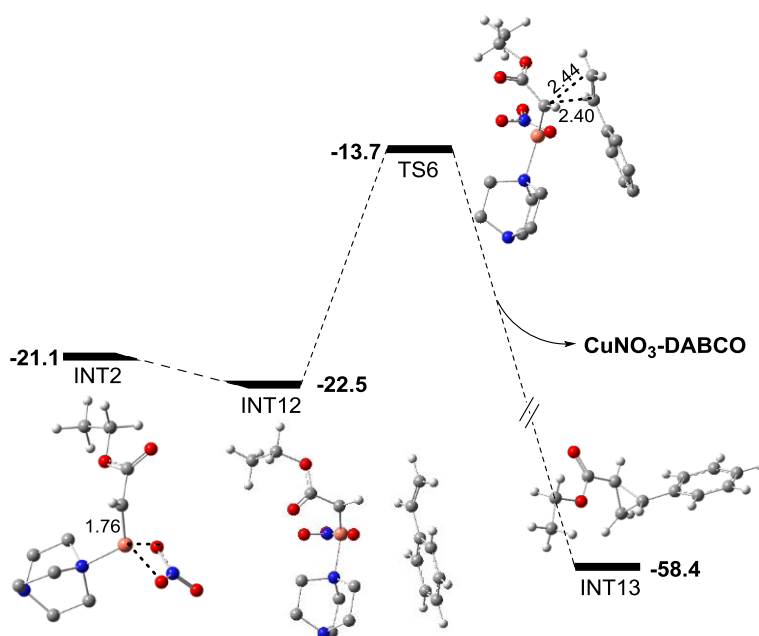

**Figure S5.** Free energy profile for the **INT2** induced cyclopropanation in the presence of styrene. Bond lengths are shown in Å.

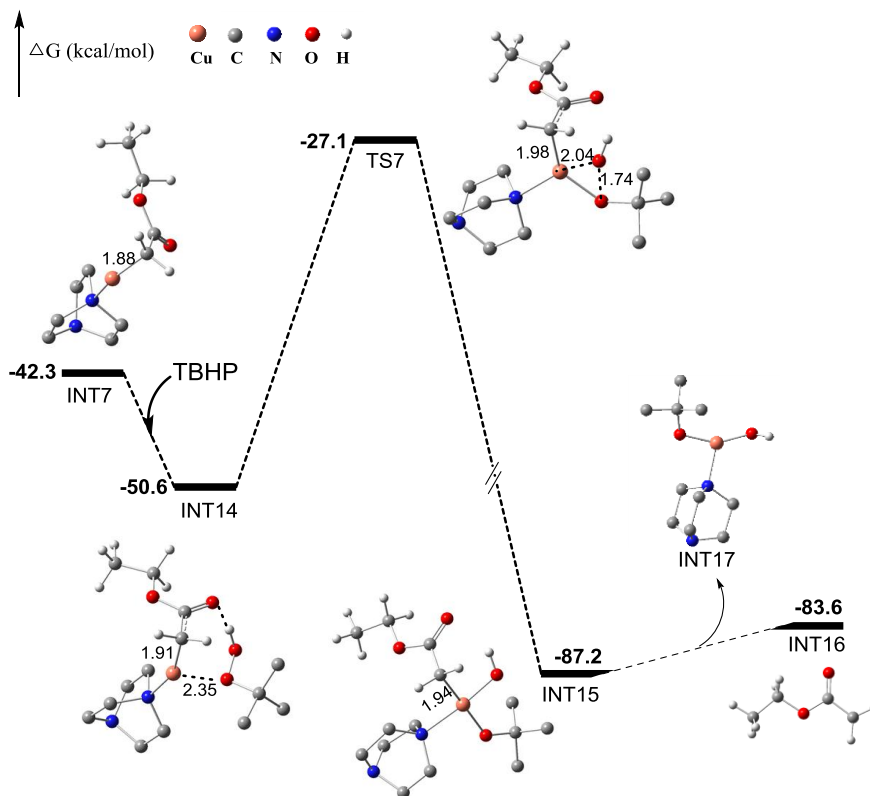

**Figure S6.** Free energy profile for the OA of *t*BuOOH onto INT7. Bond lengths are shown in Å.

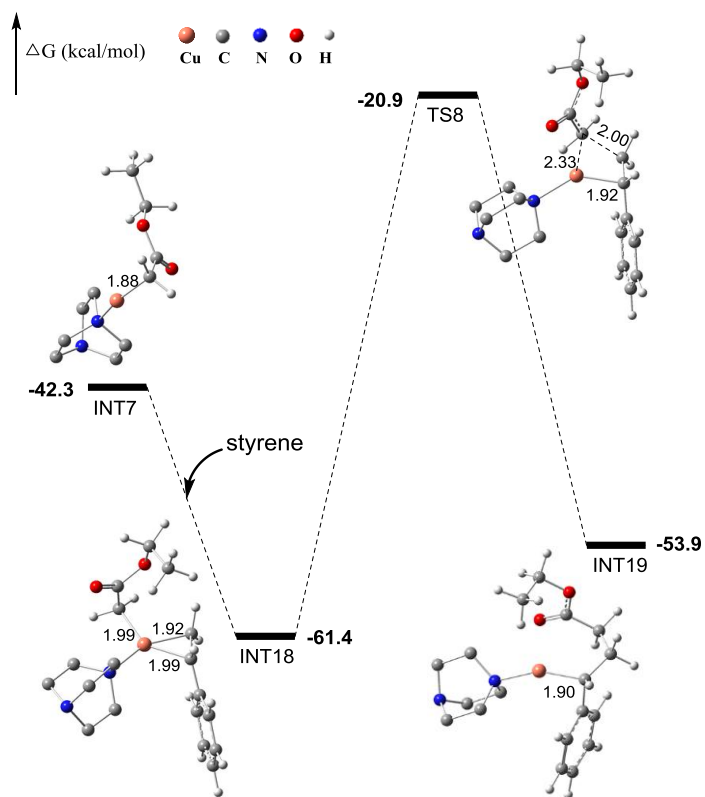

**Figure S7.** Free energy profile for the intermolecular carbocupration of the styrene to INT7. Bond lengths are shown in Å.



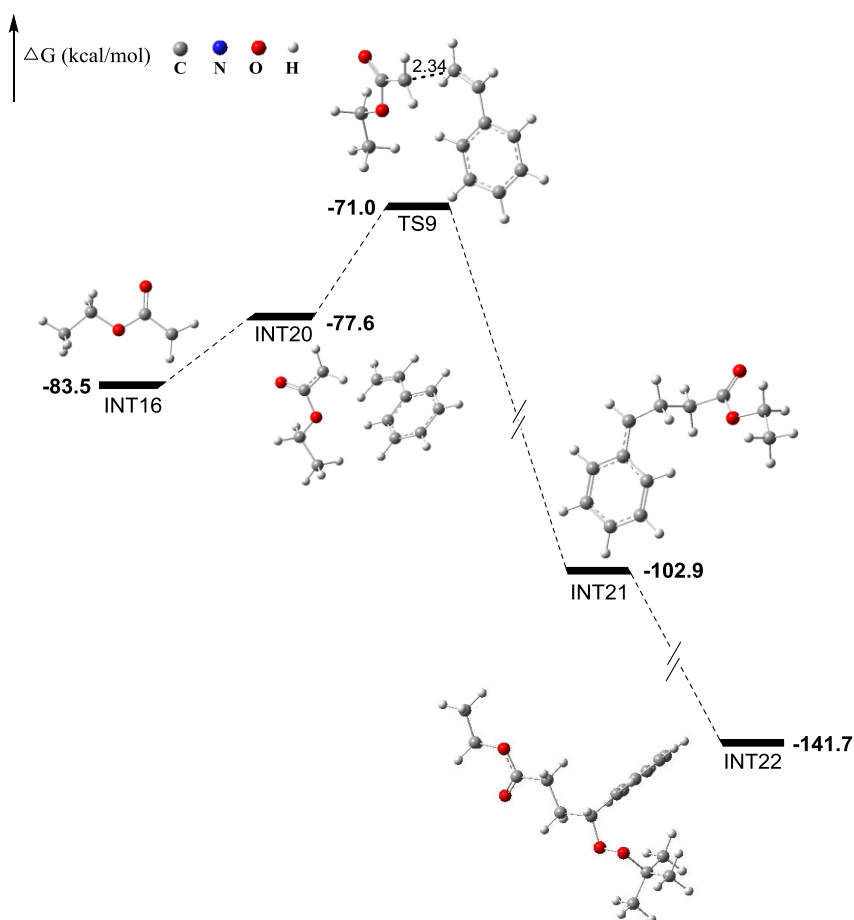

**Figure S8.** Energy profile for the radical addition to styrene and the formation of the final product. Bond lengths are shown in Å.

### References:

1. J.-D. Chai, M. Head-Gordon, *Phys. Chem. Chem. Phys.* **2008**, *10*, 6615.
2. P. C. Hariharan, J. A. Pople, *Theor. Chim. Acta* **1973**, *28*, 213.
3. M. J. Frisch, G. W. Trucks, H. B. Schlegel, G. E. Scuseria, M. A. Robb, J. R. Cheeseman, G. Scalmani, V. Barone, B. Mennucci, G. A. Petersson, H. Nakatsuji, M. Caricato, X. Li, H. P. Hratchian, A. F. Izmaylov, J. Bloino, G. Zheng, J. L. Sonnenberg, M. Hada, M. Ehara, K. Toyota, R. Fukuda, J. Hasegawa, M. Ishida, T. Nakajima, Y. Honda, O. Kitao, H. Nakai, T. Vreven, J. A. Montgomery, Jr., J. E. Peralta, F. Ogliaro, M. Bearpark, J. J. Heyd, E. Brothers, K. N. Kudin, V. N. Staroverov, T. Keith, R. Kobayashi, J. Normand, K. Raghavachari, A. Rendell,

J. C. Burant, S. S. Iyengar, J. Tomasi, M. Cossi, N. Rega, J. M. Millam, M. Klene, J. E. Knox, J. B. Cross, V. Bakken, C. Adamo, J. Jaramillo, R. Gomperts, R. E. Stratmann, O. Yazyev, A. J. Austin, R. Cammi, C. Pomelli, J. W. Ochterski, R. L. Martin, K. Morokuma, V. G. Zakrzewski, G. A. Voth, P. Salvador, J. J. Dannenberg, S. Dapprich, A. D. Daniels, O. Farkas, J. B. Foresman, J. V. Ortiz, J. Cioslowski, and D. J. Fox, Gaussian 09, Revision C.01, Gaussian, Inc., Wallingford CT, 2010.

## Trapping of Radicals

### Scheme S1. Trapping of Radicals by TEMPO<sup>a</sup>

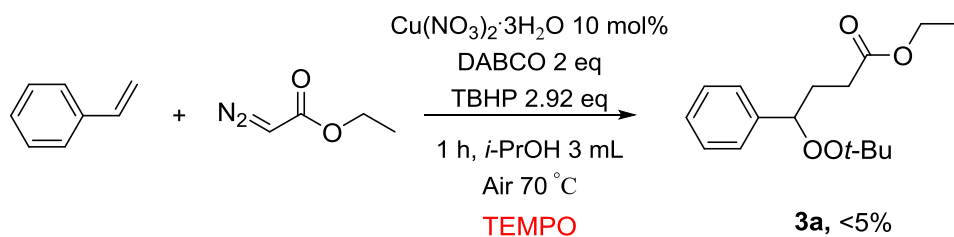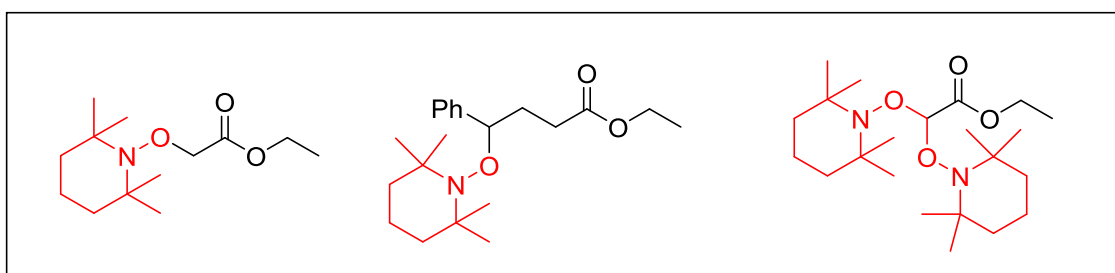

<sup>a</sup> TEMPO was added after the standard system being stirred for 5 minutes, the reaction was stopped after another 5 minutes.

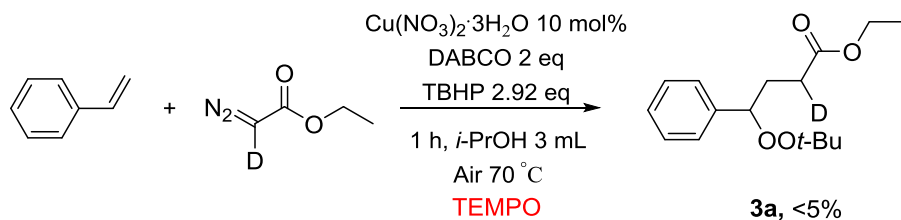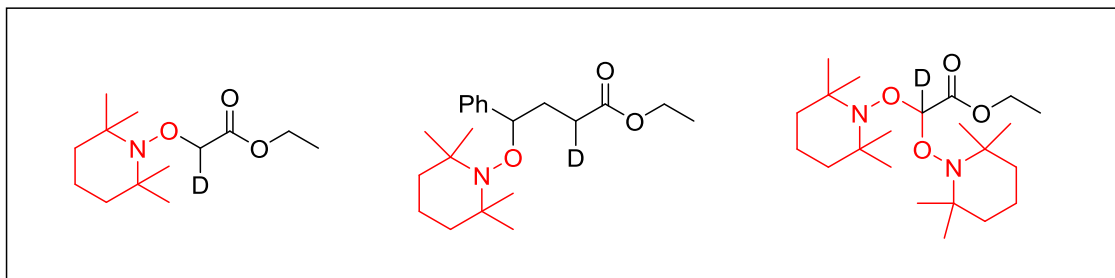

<sup>a</sup> TEMPO was added after the standard system being stirred for 5 minutes, the reaction was stopped after another 5 minutes.

## Adduct Detected by LC-MS

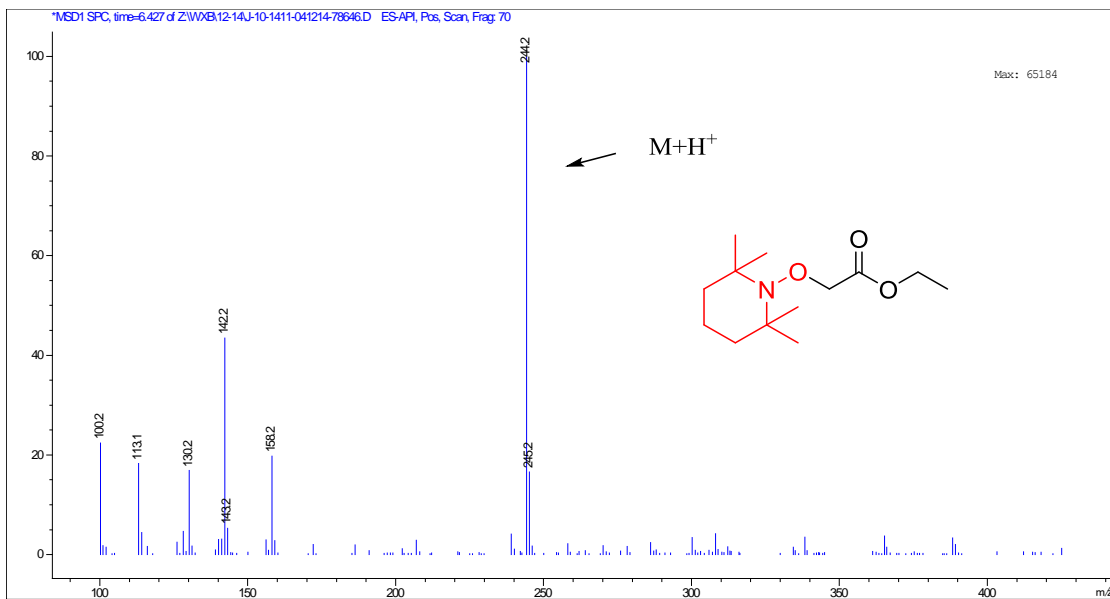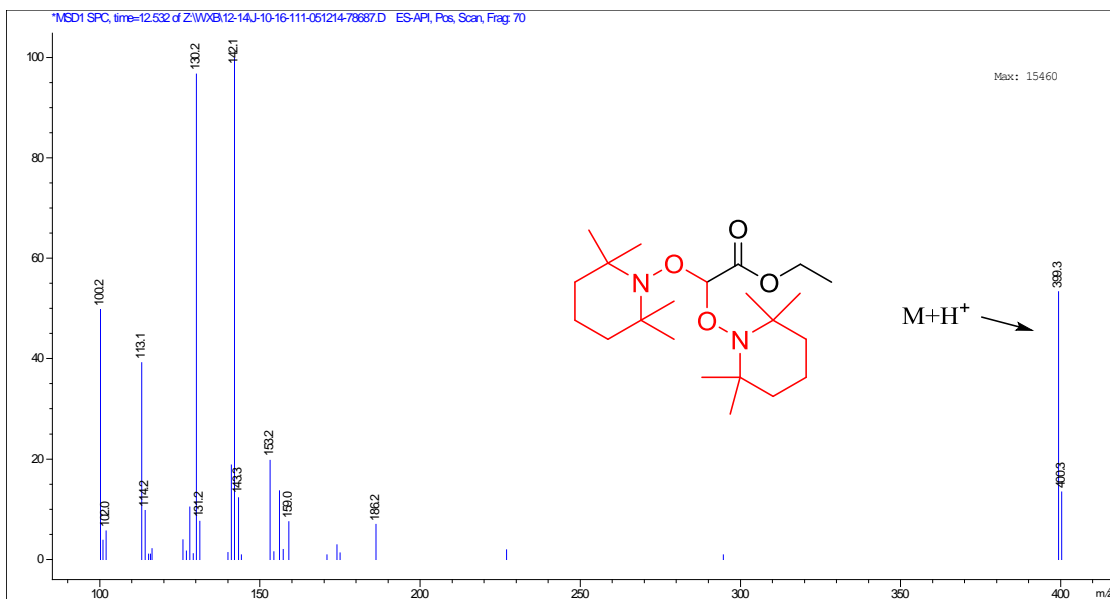

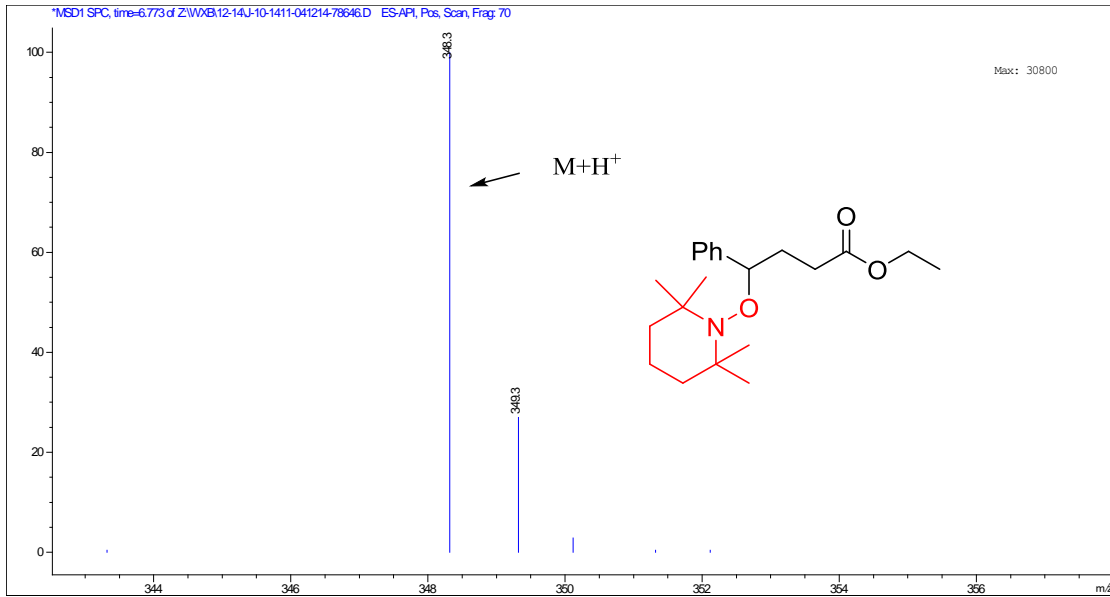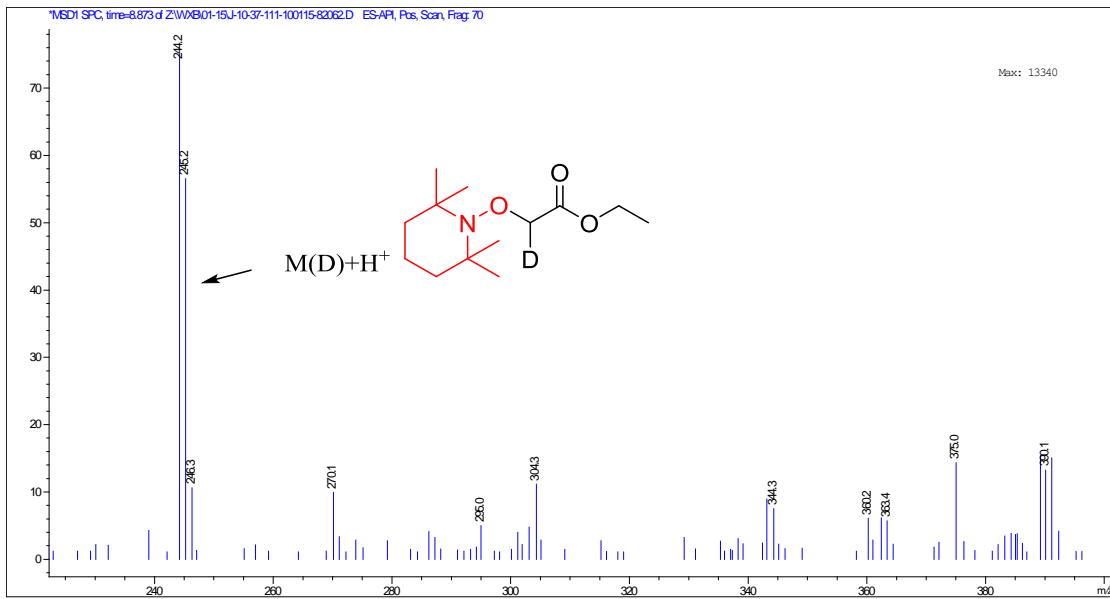

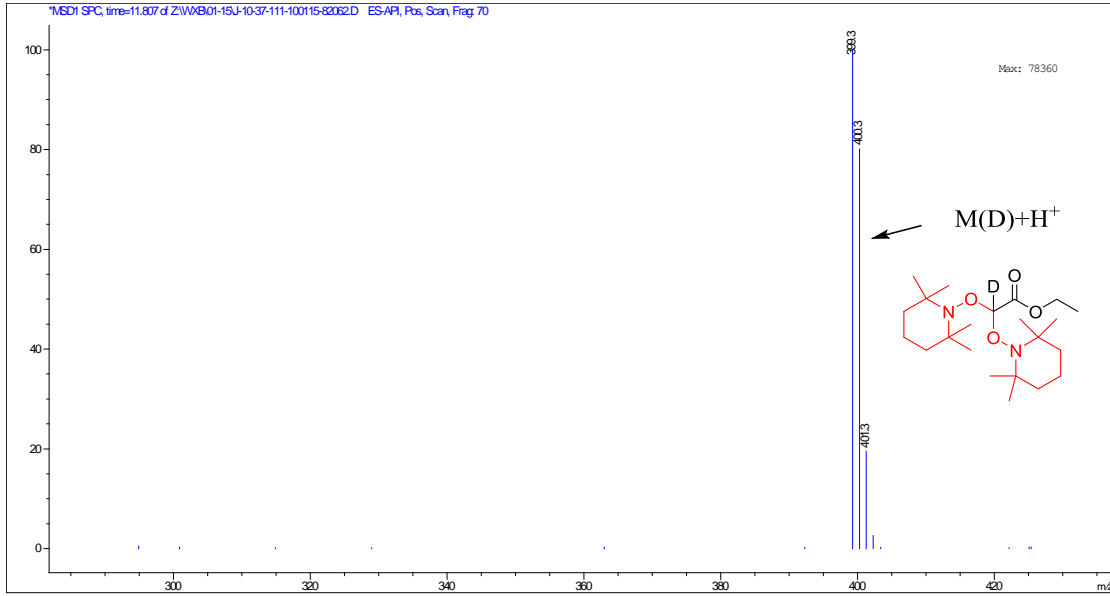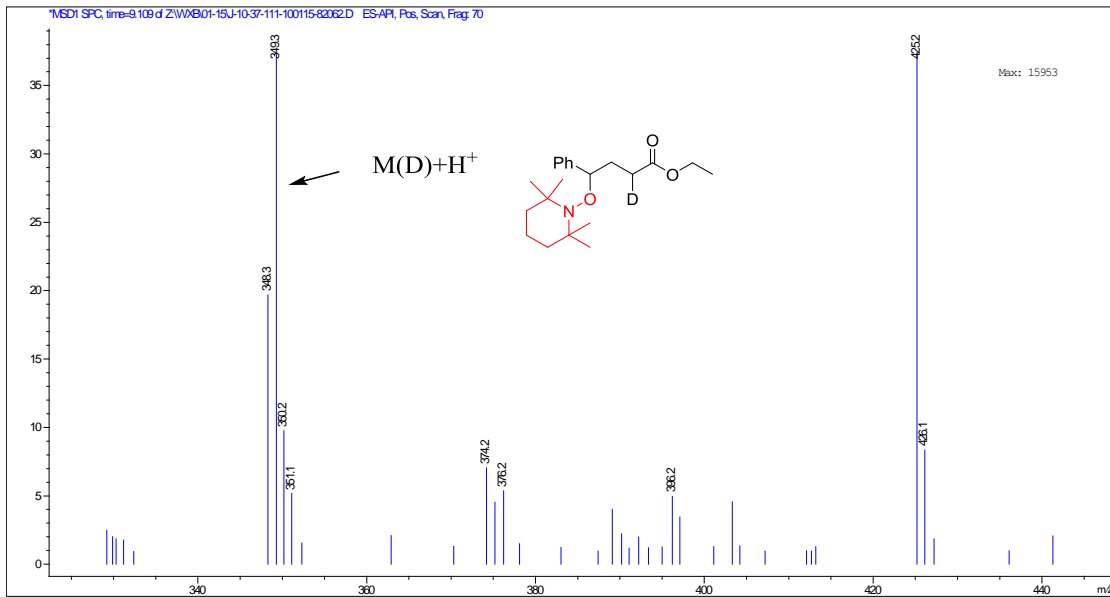

## Compound characterizations

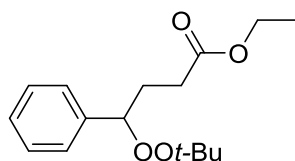

**Ethyl 4-(*tert*-butylperoxy)-4-phenylbutanoate (3a).**  $^1\text{H}$  NMR (400 MHz,  $\text{CDCl}_3$ )  $\delta$  7.36 - 7.25 (m, 5H), 4.90 - 4.87 (m, 1H), 4.10 (q,  $J = 7.1$  Hz, 2H), 2.39 - 2.35 (m, 2H), 2.24 - 2.14 (m, 1H), 2.08 - 2.00 (m, 1H), 1.23 (t,  $J = 7.1$  Hz, 3H), 1.20 (s, 9H);  $^{13}\text{C}$  NMR (100 MHz,  $\text{CDCl}_3$ )  $\delta$  173.0, 140.7, 128.2, 127.7, 126.7, 84.6, 80.2, 60.3, 30.6, 30.2, 26.4, 14.1; HRMS (ESI-TOF): Anal. Calcd. For  $\text{C}_{16}\text{H}_{24}\text{O}_4 + \text{Na}^+$ : 303.1567, Found: 303.1572; IR (neat,  $\text{cm}^{-1}$ ):  $\nu$  2979, 2933, 1733, 1363, 1195.

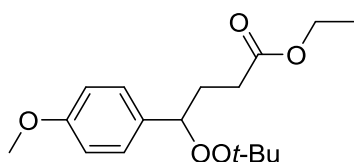

**Ethyl 4-(*tert*-butylperoxy)-4-(4-methoxyphenyl)butanoate (3b).**  $^1\text{H}$  NMR (400 MHz,  $\text{CDCl}_3$ )  $\delta$  7.26 - 7.23 (m, 2H), 6.89 - 6.85 (m, 2H), 4.84 - 4.81 (m, 1H), 4.10 (q,  $J = 7.1$  Hz, 2H), 3.80 (s, 3H), 2.36 - 2.32 (m, 2H), 2.27 - 2.18 (m, 1H), 2.06 - 1.99 (m, 1H), 1.23 (t,  $J = 7.1$  Hz, 3H), 1.19 (s, 9H);  $^{13}\text{C}$  NMR (100 MHz,  $\text{CDCl}_3$ )  $\delta$  173.1, 159.2, 132.6, 128.2, 113.6, 84.3, 80.1, 60.3, 55.2, 30.7, 30.0, 26.4, 14.2; HRMS (ESI-TOF): Anal. Calcd. For  $\text{C}_{17}\text{H}_{26}\text{O}_5 + \text{Na}^+$ : 333.1672, Found: 333.1683; IR (neat,  $\text{cm}^{-1}$ ):  $\nu$  2978, 2934, 1732, 1512, 1246.

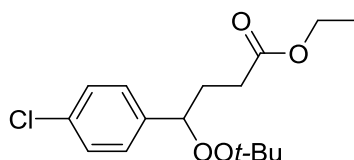

**Ethyl 4-(*tert*-butylperoxy)-4-(4-chlorophenyl)butanoate (3c).**  $^1\text{H}$  NMR (400 MHz,  $\text{CDCl}_3$ )  $\delta$  7.32 - 7.25 (m, 4H), 4.88 - 4.85 (m, 1H), 4.11 (q,  $J = 7.1$  Hz, 2H), 2.40 - 2.36 (m, 2H), 2.18 - 2.08 (m, 1H), 2.05 - 1.95 (m, 1H), 1.24 (t,  $J = 7.1$  Hz, 2H), 1.19 (s, 9H);  $^{13}\text{C}$  NMR (100 MHz,  $\text{CDCl}_3$ )  $\delta$  172.9, 139.5, 133.3, 128.3, 128.0, 83.8, 80.3, 60.4, 30.5,

30.2, 26.3, 14.1; HRMS (ESI-TOF): Anal. Calcd. For  $C_{16}H_{23}^{35}ClO_4+Na^+$ : 337.1177,  $C_{16}H_{23}^{37}ClO_4+Na^+$ : 339.1148, Found: 337.1190, 339.1167; IR (neat,  $cm^{-1}$ ):  $\nu$  2979, 2932, 1733, 1363, 1195.

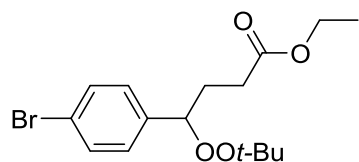

**Ethyl 4-(4-bromophenyl)-4-(tert-butylperoxy)butanoate (3d).**  $^1H$  NMR (400 MHz,  $CDCl_3$ )  $\delta$  7.48 - 7.45 (m, 2H), 7.22 - 7.20 (m, 2H), 4.87 - 4.83 (m, 1H), 4.11 (q,  $J = 7.2$  Hz, 2H), 2.40 - 2.36 (m, 2H), 2.17 - 2.08 (m, 1H), 2.03 - 1.95 (m, 1H), 1.24 (t,  $J = 7.2$  Hz, 2H), 1.19 (s, 9H);  $^{13}C$  NMR (100 MHz,  $CDCl_3$ )  $\delta$  172.9, 140.1, 131.3, 128.4, 121.5, 83.9, 80.4, 60.4, 30.5, 30.2, 26.4, 14.2; HRMS (ESI-TOF): Anal. Calcd. For  $C_{16}H_{23}^{79}BrO_4+Na^+$ : 381.0672,  $C_{16}H_{23}^{81}BrO_4+Na^+$ : 383.0651, Found: 381.0696, 383.0680; IR (neat,  $cm^{-1}$ ):  $\nu$  2979, 2932, 1733, 1363, 1011.

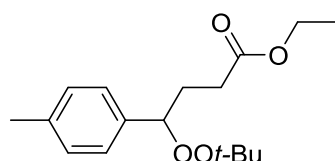

**Ethyl 4-(tert-butylperoxy)-4-(p-tolyl)butanoate (3e).**  $^1H$  NMR (400 MHz,  $CDCl_3$ )  $\delta$  7.22 - 7.20 (m, 2H), 7.15 - 7.13 (m, 2H), 4.85 (t,  $J = 6.8$  Hz, 1H), 4.10 (q,  $J = 7.1$  Hz, 2H), 2.38 - 2.33 (m, 5H), 2.25 - 2.16 (m, 1H), 2.07 - 1.98 (m, 1H), 1.25 - 1.20 (m, 12H);  $^{13}C$  NMR (100 MHz,  $CDCl_3$ )  $\delta$  173.1, 137.6, 137.3, 128.9, 126.7, 84.5, 80.2, 60.3, 30.6, 30.1, 26.4, 21.1, 14.1; HRMS (ESI-TOF): Anal. Calcd. For  $C_{17}H_{26}O_4+Na^+$ : 317.1723, Found: 317.1694; IR (neat,  $cm^{-1}$ ):  $\nu$  2979, 2931, 1734, 1363, 1196.

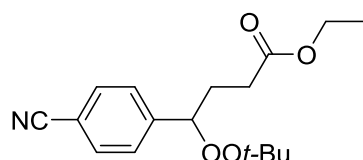

**Ethyl 4-(tert-butylperoxy)-4-(4-cyanophenyl)butanoate (3f).**  $^1H$  NMR (400 MHz,  $CDCl_3$ )  $\delta$  7.65 (d,  $J = 8.2$  Hz, 2H), 7.45 (d,  $J = 8.2$  Hz, 2H), 4.97 - 4.94 (m, 1H), 4.13 (q,  $J = 7.1$  Hz, 2H), 2.47 - 2.38 (m, 2H), 2.07 - 2.00 (m, 2H), 1.26 (t,  $J = 7.1$  Hz, 3H), 1.20



(s, 9H);  $^{13}\text{C}$  NMR (100 MHz,  $\text{CDCl}_3$ )  $\delta$  172.7, 146.9, 132.1, 127.2, 118.8, 111.3, 83.7, 80.7, 60.5, 30.4, 30.3, 26.3, 14.2; HRMS (ESI-TOF): Anal. Calcd. For  $\text{C}_{17}\text{H}_{23}\text{NO}_4+\text{Na}^+$ : 328.1519, Found: 328.1504; IR (neat,  $\text{cm}^{-1}$ ):  $\nu$  2979, 2933, 2229, 1731, 1364, 1193.

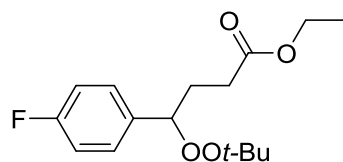

**Ethyl 4-(*tert*-butylperoxy)-4-(4-fluorophenyl)butanoate (3g).**  $^1\text{H}$  NMR (400 MHz,  $\text{CDCl}_3$ )  $\delta$  7.32 - 7.27 (m, 2H), 7.04 - 7.00 (m, 2H), 4.88 - 4.85 (m, 1H), 4.11 (q,  $J = 7.1$  Hz, 2H), 2.39 - 2.35 (m, 2H), 2.21 - 2.12 (m, 1H), 2.04 - 1.96 (m, 1H), 1.24 (t,  $J = 7.1$  Hz, 3H), 1.19 (s, 9H);  $^{13}\text{C}$  NMR (100 MHz,  $\text{CDCl}_3$ )  $\delta$  172.9, 162.3 (d,  $J = 243.9$  Hz), 136.6 (d,  $J = 3.1$  Hz), 128.4 (d,  $J = 8.0$  Hz), 115.0 (d,  $J = 21.2$  Hz), 83.9, 80.3, 60.4, 30.5, 30.2, 26.4, 14.1; HRMS (ESI-TOF): Anal. Calcd. For  $\text{C}_{16}\text{H}_{23}\text{FO}_4+\text{Na}^+$ : 321.1473, Found: 321.1493; IR (neat,  $\text{cm}^{-1}$ ):  $\nu$  2980, 2933, 1733, 1510, 1223.

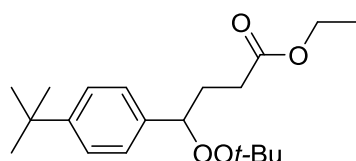

**Ethyl 4-(4-(*tert*-butyl)phenyl)-4-(*tert*-butylperoxy)butanoate (3h).**  $^1\text{H}$  NMR (400 MHz,  $\text{CDCl}_3$ )  $\delta$  7.36 - 7.34 (m, 2H), 7.25 - 7.23 (m, 2H), 4.87 (t,  $J = 6.8$  Hz, 1H), 4.09 (q,  $J = 7.1$  Hz, 2H), 2.38 - 2.36 (m, 2H), 2.26 - 2.17 (m, 1H), 2.09 - 2.01 (m, 1H), 1.31 (s, 9H), 1.24 - 1.21 (m, 12H);  $^{13}\text{C}$  NMR (100 MHz,  $\text{CDCl}_3$ )  $\delta$  173.1, 150.5, 137.4, 126.4, 125.1, 84.5, 80.2, 60.3, 34.4, 31.3, 30.6, 30.1, 26.4, 14.2; HRMS (ESI-TOF): Anal. Calcd. For  $\text{C}_{20}\text{H}_{32}\text{O}_4+\text{Na}^+$ : 359.2193, Found: 359.2176; IR (neat,  $\text{cm}^{-1}$ ):  $\nu$  2966, 2905, 1735, 1363, 1195.

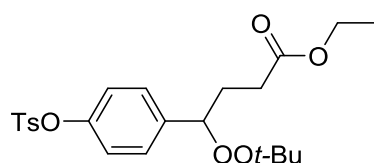

**Ethyl 4-(*tert*-butylperoxy)-4-(4-(tosyloxy)phenyl)butanoate (3i).**  $^1\text{H}$  NMR (400 MHz,  $\text{CDCl}_3$ )  $\delta$  7.70 (d,  $J = 8.3$  Hz, 2H), 7.31 - 7.24 (m, 4H), 6.96 - 6.94 (m, 2H), 4.87 -

4.84 (m, 1H), 4.11 (q,  $J = 7.1$  Hz, 2H), 2.44 (s, 3H), 2.39 - 2.35 (m, 2H), 2.14 - 2.05 (m, 1H), 2.03 - 1.93 (m, 1H), 1.24 (t,  $J = 7.1$  Hz, 3H), 1.17 (s, 9H);  $^{13}\text{C}$  NMR (100 MHz,  $\text{CDCl}_3$ )  $\delta$  172.8, 148.9, 145.2, 140.0, 132.3, 129.6, 128.4, 127.8, 122.0, 83.6, 80.2, 60.3, 30.4, 30.1, 26.3, 21.6, 14.1; HRMS (ESI-TOF): Anal. Calcd. For  $\text{C}_{23}\text{H}_{30}\text{O}_7\text{S}+\text{Na}^+$ : 473.1604, Found: 473.1600; IR (neat,  $\text{cm}^{-1}$ ):  $\nu$  2980, 2933, 1732, 1373, 1196.

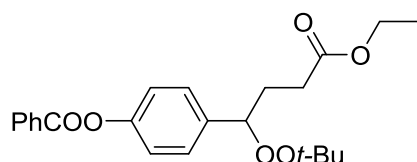

**4-(1-(*Tert*-butylperoxy)-4-ethoxy-4-oxobutyl)phenyl benzoate (3j).**  $^1\text{H}$  NMR (400 MHz,  $\text{CDCl}_3$ )  $\delta$  8.20 - 8.18 (m, 2H), 7.64 - 7.60 (m, 1H), 7.52 - 7.48 (m, 2H), 7.39 (d,  $J = 8.5$  Hz, 2H), 7.20 (d,  $J = 8.5$  Hz, 2H), 4.95 - 4.91 (m, 1H), 4.12 (q,  $J = 7.1$  Hz, 2H), 2.43 - 2.39 (m, 2H), 2.22 - 2.14 (m, 1H), 2.10 - 2.03 (m, 1H), 1.26 - 1.21 (m, 12H);  $^{13}\text{C}$  NMR (100 MHz,  $\text{CDCl}_3$ )  $\delta$  173.0, 165.1, 150.4, 138.5, 133.5, 130.1, 129.5, 128.5, 127.8, 121.4, 84.0, 80.3, 60.4, 30.6, 30.3, 26.4, 14.2; HRMS (ESI-TOF): Anal. Calcd. For  $\text{C}_{23}\text{H}_{28}\text{O}_6+\text{Na}^+$ : 423.1778, Found: 423.1807; IR (neat,  $\text{cm}^{-1}$ ):  $\nu$  2966, 2905, 1735, 1508, 1262.

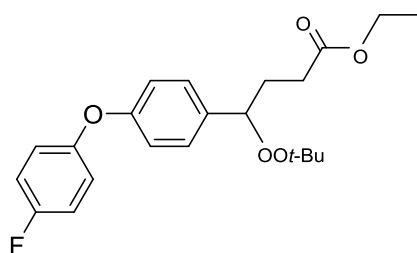

**Ethyl 4-(*tert*-butylperoxy)-4-(4'-fluoro-[1,1'-biphenyl]-4-yl)butanoate (3k).**  $^1\text{H}$  NMR (400 MHz,  $\text{CDCl}_3$ )  $\delta$  7.29 - 7.26 (m, 2H), 7.05 - 6.91 (m, 6H), 4.88 - 4.85 (m, 1H), 4.11 (q,  $J = 7.1$  Hz, 2H), 2.38 (t,  $J = 7.6$  Hz, 2H), 2.25 - 2.15 (m, 1H), 2.07 - 1.98 (m, 1H), 1.24 (t,  $J = 7.1$  Hz, 3H), 1.21 (s, 9H);  $^{13}\text{C}$  NMR (100 MHz,  $\text{CDCl}_3$ )  $\delta$  173.0, 158.8 (d,  $J = 240.3$  Hz), 157.3, 152.7 (d,  $J = 2.6$  Hz), 135.4, 128.3, 120.6 (d,  $J = 8.3$  Hz), 117.8, 116.3 (d,  $J = 23.2$  Hz), 84.2, 80.3, 60.4, 30.7, 30.2, 26.4, 14.2; HRMS (ESI-TOF): Anal. Calcd. For  $\text{C}_{22}\text{H}_{27}\text{FO}_5+\text{Na}^+$ : 413.1735, Found: 413.1759; IR (neat,

cm<sup>-1</sup>):  $\nu$  2979, 2933, 1733, 1496, 1211.

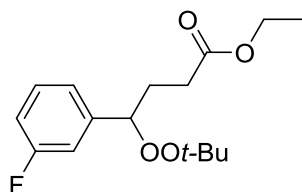

**Ethyl 4-(*tert*-butylperoxy)-4-(3-fluorophenyl)butanoate (3l).** <sup>1</sup>H NMR (400 MHz, CDCl<sub>3</sub>)  $\delta$  7.32 - 7.27 (m, 1H), 7.10 - 7.04 (m, 2H), 6.98 - 6.94 (m, 1H), 4.91 - 4.87 (m, 1H), 4.12 (q,  $J$  = 7.1 Hz, 2H), 2.41 - 2.37 (m, 2H), 2.17 - 1.97 (m, 2H), 1.24 (t,  $J$  = 7.1 Hz, 3H), 1.21 (s, 9H); <sup>13</sup>C NMR (100 MHz, CDCl<sub>3</sub>)  $\delta$  172.9, 162.8 (d,  $J$  = 244.1 Hz), 143.8 (d,  $J$  = 6.7 Hz), 129.7 (d,  $J$  = 8.1 Hz), 122.2 (d,  $J$  = 2.9 Hz), 114.5 (d,  $J$  = 21.0 Hz), 113.5 (d,  $J$  = 21.6 Hz), 83.8 (d,  $J$  = 1.6 Hz), 80.4, 60.4, 30.4, 30.3, 26.3, 14.1; HRMS (ESI-TOF): Anal. Calcd. For C<sub>16</sub>H<sub>23</sub>FO<sub>4</sub>+Na<sup>+</sup>: 321.1473, Found: 321.1492; IR (neat, cm<sup>-1</sup>):  $\nu$  2980, 2934, 1733, 1449, 1194.

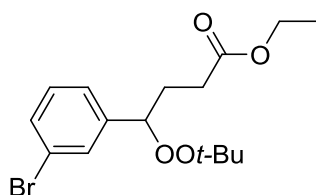

**Ethyl 4-(3-bromophenyl)-4-(*tert*-butylperoxy)butanoate (3m).** <sup>1</sup>H NMR (400 MHz, CDCl<sub>3</sub>)  $\delta$  7.48 - 7.47 (m, 1H), 7.42 - 7.39 (m, 1H), 7.27 - 7.19 (m, 2H), 4.87 - 4.83 (m, 1H), 4.12 (q,  $J$  = 7.1 Hz, 2H), 2.41 - 2.37 (m, 2H), 2.16 - 2.07 (m, 1H), 2.05 - 1.96 (m, 1H), 1.25 (t,  $J$  = 7.1 Hz, 3H), 1.20 (s, 9H); <sup>13</sup>C NMR (100 MHz, CDCl<sub>3</sub>)  $\delta$  172.8, 143.5, 130.7, 129.8, 129.7, 125.3, 122.3, 83.8, 80.4, 60.4, 30.5, 30.4, 26.4, 14.2; HRMS (ESI-TOF): Anal. Calcd. For C<sub>16</sub>H<sub>23</sub><sup>79</sup>BrO<sub>4</sub>+Na<sup>+</sup>: 381.0672, C<sub>16</sub>H<sub>23</sub><sup>81</sup>BrO<sub>4</sub>+Na<sup>+</sup>: 383.0651, Found: 381.0692, 383.0673; IR (neat, cm<sup>-1</sup>):  $\nu$  2979, 2933, 1732, 1363, 1193.

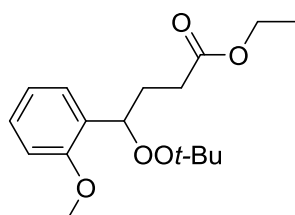

**Ethyl 4-(*tert*-butylperoxy)-4-(2-methoxyphenyl)butanoate (3n).**  $^1\text{H}$  NMR (400 MHz,  $\text{CDCl}_3$ )  $\delta$  7.41 - 7.39 (m, 1H), 7.25 - 7.20 (m, 1H), 6.98 - 6.94 (m, 1H), 6.85 - 6.83 (m, 1H), 5.36 (t,  $J = 6.4$  Hz, 1H), 4.09 (q,  $J = 7.1$  Hz, 2H), 3.80 (s, 3H), 2.41 - 2.36 (m, 2H), 2.13 - 2.06 (m, 2H), 1.24 - 1.21 (m, 12H);  $^{13}\text{C}$  NMR (100 MHz,  $\text{CDCl}_3$ )  $\delta$  173.3, 156.4, 129.2, 128.2, 127.0, 120.4, 110.2, 80.1, 78.5, 60.2, 55.2, 30.5, 29.2, 26.4, 14.2; HRMS (ESI-TOF): Anal. Calcd. For  $\text{C}_{17}\text{H}_{26}\text{O}_5 + \text{Na}^+$ : 333.1672, Found: 333.1696; IR (neat,  $\text{cm}^{-1}$ ):  $\nu$  2978, 2935, 1734, 1492, 1242.

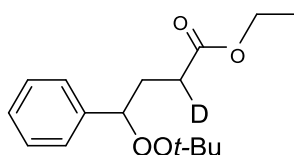

**Ethyl 4-(*tert*-butylperoxy)-4-phenylbutanoate-2-d (D-3a).**  $^1\text{H}$  NMR (400 MHz,  $\text{CDCl}_3$ )  $\delta$  7.36 - 7.27 (m, 5H), 4.90 - 4.87 (m, 1H), 4.10 (q,  $J = 7.1$  Hz, 2H), 2.39 - 2.34 (m, 1H), 2.22 - 2.13 (m, 1H), 2.07 - 2.00 (m, 1H), 1.24 (t,  $J = 7.1$  Hz, 3H), 1.20 (s, 9H); HRMS (ESI-TOF): Anal. Calcd. For  $\text{C}_{16}\text{H}_{23}\text{DO}_4 + \text{Na}^+$ : 304.1630, Found: 304.1641.

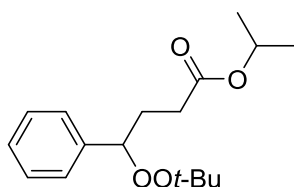

**Isopropyl 4-(*tert*-butylperoxy)-4-phenylbutanoate (4b).**  $^1\text{H}$  NMR (400 MHz,  $\text{CDCl}_3$ )  $\delta$  7.36 - 7.25 (m, 5H), 5.04 - 4.94 (m, 1H), 4.90 - 4.87 (m, 1H), 2.36 - 2.32 (m, 2H), 2.20 - 2.13 (m, 1H), 2.07 - 1.98 (m, 1H), 1.22 - 1.20 (m, 15H);  $^{13}\text{C}$  NMR (100 MHz,  $\text{CDCl}_3$ )  $\delta$  172.6, 140.8, 128.2, 127.7, 126.7, 84.7, 80.2, 67.6, 30.9, 30.3, 26.4, 21.8; MS (ESI-quadrupole): Anal. Calcd. For  $\text{C}_{17}\text{H}_{26}\text{O}_4 + \text{Na}^+$ : 317, Found: 317; IR (neat,  $\text{cm}^{-1}$ ):  $\nu$  2981, 2935, 1729, 1219, 1109.

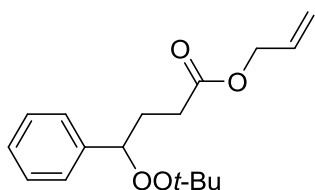

**Allyl 4-(*tert*-butylperoxy)-4-phenylbutanoate (4c).**  $^1\text{H}$  NMR (400 MHz,  $\text{CDCl}_3$ )  $\delta$  7.36 - 7.25 (m, 5H), 5.94 - 5.85 (m, 1H), 5.33 - 5.21 (m, 2H), 4.94 - 4.88 (m, 1H), 4.56 - 4.54 (m, 2H), 2.44 - 2.40 (m, 2H), 2.22 - 2.16 (m, 1H), 2.10 - 2.01 (m, 1H), 1.20 (s, 9H);  $^{13}\text{C}$  NMR (100 MHz,  $\text{CDCl}_3$ )  $\delta$  172.7, 140.7, 132.1, 128.2, 127.7, 126.7, 118.2, 84.6, 65.1, 30.5, 30.2, 26.4; HRMS (ESI-TOF): Anal. Calcd. For  $\text{C}_{17}\text{H}_{24}\text{O}_4 + \text{Na}^+$ : 315.1567, Found: 315.1579; IR (neat,  $\text{cm}^{-1}$ ):  $\nu$  2979, 2932, 1737, 1363, 1197.

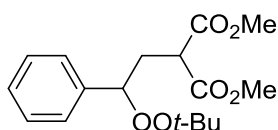

**Dimethyl 2-(2-(*tert*-butylperoxy)-2-phenylethyl)malonate (4d).**  $^1\text{H}$  NMR (400 MHz,  $\text{CDCl}_3$ )  $\delta$  7.23 - 7.26 (m, 5H), 4.93 - 4.89 (m, 1H), 4.712 - 3.709 (m, 6H), 3.64 - 3.60 (m, 1H), 2.49 - 2.42 (m, 1H), 2.37 - 2.30 (m, 1H), 1.17 (s, 9H);  $^{13}\text{C}$  NMR (100 MHz,  $\text{CDCl}_3$ )  $\delta$  169.4, 169.4, 140.2, 128.2, 127.9, 126.7, 83.1, 80.3, 52.49, 52.45, 48.6, 34.4, 26.3; MS (ESI-quadrupole): Anal. Calcd. For  $\text{C}_{17}\text{H}_{24}\text{O}_6 + \text{Na}^+$ : 347, Found: 347; IR (neat,  $\text{cm}^{-1}$ ):  $\nu$  2979, 2955, 1754, 1737, 1197.

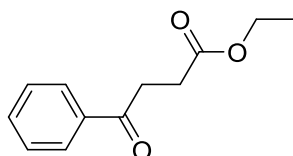

**Ethyl 4-oxo-4-phenylbutanoate (9a).**<sup>[51]</sup>  $^1\text{H}$  NMR (400 MHz,  $\text{CDCl}_3$ )  $\delta$  8.00 - 7.98 (m, 2H), 7.58 - 7.55 (m, 1H), 7.48 - 7.44 (m, 2H), 4.16 (q,  $J = 7.1$  Hz, 2H), 3.31 (t,  $J = 6.6$  Hz, 2H), 2.76 (t,  $J = 6.6$  Hz, 2H), 1.26 (t,  $J = 7.1$  Hz, 3H);  $^{13}\text{C}$  NMR (100 MHz,  $\text{CDCl}_3$ )  $\delta$  198.1, 172.8, 136.5, 133.1, 128.5, 127.9, 60.6, 33.3, 28.2, 14.1; MS (ESI-quadrupole): Anal. Calcd. For  $\text{C}_{12}\text{H}_{14}\text{O}_3 + \text{H}^+$ : 207, Found: 207; IR (neat,  $\text{cm}^{-1}$ ):  $\nu$  2981, 2932, 1730, 1686, 1216, 1159.

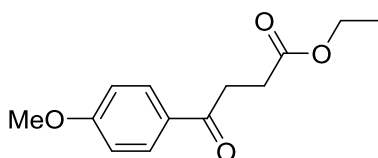

**Ethyl 4-(4-methoxyphenyl)-4-oxobutanoate (9b).**<sup>[61]</sup>  $^1\text{H}$  NMR (400 MHz,  $\text{CDCl}_3$ )  $\delta$

7.97 (d,  $J = 8.8$  Hz, 2H), 6.94 (d,  $J = 8.8$  Hz, 2H), 4.16 (q,  $J = 7.1$  Hz, 2H), 3.87 (s, 3 H), 3.27 (t,  $J = 6.6$  Hz, 2H), 2.74 (t,  $J = 6.6$  Hz, 2H), 1.27 (t,  $J = 7.1$  Hz, 3H);  $^{13}\text{C}$  NMR (100 MHz,  $\text{CDCl}_3$ )  $\delta$  196.6, 173.0, 163.5, 130.2, 129.7, 113.7, 60.5, 55.4, 33.0, 28.3, 14.2; MS (ESI-quadrupole): Anal. Calcd. For  $\text{C}_{13}\text{H}_{16}\text{O}_4+\text{H}^+$ : 237, Found: 237; IR (neat,  $\text{cm}^{-1}$ ):  $\nu$  2921, 2851, 1731, 1718, 1676, 1027.

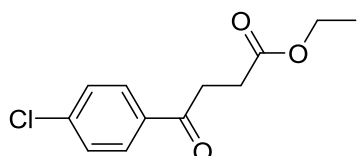

**Ethyl 4-(4-chlorophenyl)-4-oxobutanoate (9c).**  $^{1}\text{H}$  NMR (400 MHz,  $\text{CDCl}_3$ )  $\delta$  7.92 (d,  $J = 8.5$  Hz, 2H), 7.44 (d,  $J = 8.5$  Hz, 2H), 4.16 (q,  $J = 7.1$  Hz, 2H), 3.27 (t,  $J = 6.6$  Hz, 2H), 2.75 (t,  $J = 6.6$  Hz, 2H), 1.26 (t,  $J = 7.1$  Hz, 3H);  $^{13}\text{C}$  NMR (100 MHz,  $\text{CDCl}_3$ )  $\delta$  196.9, 172.7, 139.5, 134.8, 129.4, 128.8, 60.6, 33.2, 28.1, 14.1; MS (ESI-quadrupole): Anal. Calcd. For  $\text{C}_{12}\text{H}_{13}^{35}\text{ClO}_3+\text{H}^+$ : 241,  $\text{C}_{12}\text{H}_{13}^{37}\text{ClO}_3+\text{H}^+$ : 243, Found: 241, 243; IR (neat,  $\text{cm}^{-1}$ ):  $\nu$  2957, 2927, 1731, 1689, 1671, 1161.

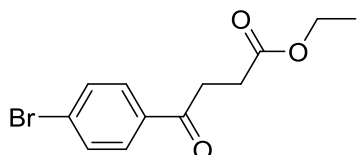

**Ethyl 4-(4-bromophenyl)-4-oxobutanoate (9d).**  $^{1}\text{H}$  NMR (400 MHz,  $\text{CDCl}_3$ )  $\delta$  7.84 (d,  $J = 8.4$  Hz, 2H), 7.60 (d,  $J = 8.4$  Hz, 2H), 4.16 (q,  $J = 7.1$  Hz, 2H), 3.27 (t,  $J = 6.6$  Hz, 2H), 2.75 (t,  $J = 6.6$  Hz, 2H), 1.26 (t,  $J = 7.1$  Hz, 3H);  $^{13}\text{C}$  NMR (100 MHz,  $\text{CDCl}_3$ )  $\delta$  197.0, 172.6, 135.2, 131.8, 129.5, 128.2, 60.6, 33.2, 28.1, 14.1; MS (ESI-quadrupole): Anal. Calcd. For  $\text{C}_{12}\text{H}_{13}^{79}\text{BrO}_3+\text{H}^+$ : 285,  $\text{C}_{12}\text{H}_{13}^{81}\text{BrO}_3+\text{H}^+$ : 287, Found: 285, 287; IR (neat,  $\text{cm}^{-1}$ ):  $\nu$  2979, 2927, 1728, 1689, 1669, 1068.

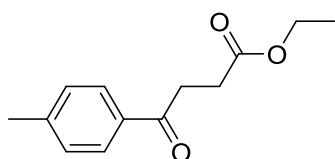

**Ethyl 4-oxo-4-(p-tolyl)butanoate (9e).**  $^{1}\text{H}$  NMR (400 MHz,  $\text{CDCl}_3$ )  $\delta$  7.89 (d,  $J = 7.8$  Hz, 2H), 7.26 (d,  $J = 7.8$  Hz, 2H), 4.16 (q,  $J = 7.1$  Hz, 2H), 3.29 (t,  $J = 6.6$  Hz, 2H),

2.75 (t,  $J = 6.6$  Hz, 2H), 2.41 (s, 3H), 1.27 (t,  $J = 7.1$  Hz, 3H);  $^{13}\text{C}$  NMR (100 MHz,  $\text{CDCl}_3$ )  $\delta$  197.7, 172.9, 143.9, 134.1, 129.2, 128.1, 60.6, 33.2, 28.3, 21.6, 14.2; MS (ESI-quadrupole): Anal. Calcd. For  $\text{C}_{13}\text{H}_{16}\text{O}_3+\text{H}^+$ : 221, Found: 221; IR (neat,  $\text{cm}^{-1}$ ):  $\nu$  2984, 2922, 1722, 1677, 1607, 1159.

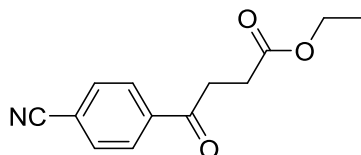

**Ethyl 4-(4-cyanophenyl)-4-oxobutanoate (9f).**  $^1\text{H}$  NMR (400 MHz,  $\text{CDCl}_3$ )  $\delta$  8.08 (d,  $J = 8.5$  Hz, 2H), 7.79 (d,  $J = 8.5$  Hz, 2H), 4.16 (q,  $J = 7.1$  Hz, 2H), 3.31 (t,  $J = 6.4$  Hz, 2H), 2.79 (t,  $J = 6.4$  Hz, 2H), 1.27 (t,  $J = 7.1$  Hz, 3H);  $^{13}\text{C}$  NMR (100 MHz,  $\text{CDCl}_3$ )  $\delta$  196.9, 172.4, 139.4, 132.4, 128.4, 117.8, 116.4, 60.7, 33.6, 28.0, 14.1; MS (ESI-quadrupole): Anal. Calcd. For  $\text{C}_{13}\text{H}_{13}\text{NO}_3+\text{H}^+$ : 232, Found: 232; IR (neat,  $\text{cm}^{-1}$ ):  $\nu$  2986, 2923, 1724, 1683, 1172.

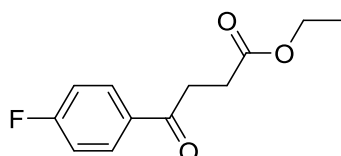

**Ethyl 4-(4-fluorophenyl)-4-oxobutanoate (9g).**<sup>[7]</sup>  $^1\text{H}$  NMR (400 MHz,  $\text{CDCl}_3$ )  $\delta$  8.03 - 8.00 (m, 2H), 7.16 - 7.11 (m, 2H), 4.16 (q,  $J = 7.1$  Hz, 2H), 3.28 (t,  $J = 6.6$  Hz, 2H), 2.76 (t,  $J = 6.6$  Hz, 2H), 1.27 (t,  $J = 7.1$  Hz, 3H);  $^{13}\text{C}$  NMR (100 MHz,  $\text{CDCl}_3$ )  $\delta$  196.5, 172.8, 165.7 (d,  $J = 253.1$  Hz), 133.0 (d,  $J = 3.3$  Hz), 130.6 (d,  $J = 9.3$  Hz), 115.6 (d,  $J = 21.7$  Hz), 60.6, 33.2, 28.2, 14.1; MS (ESI-quadrupole): Anal. Calcd. For  $\text{C}_{12}\text{H}_{13}\text{FO}_3+\text{H}^+$ : 225, Found: 225; IR (neat,  $\text{cm}^{-1}$ ):  $\nu$  3048, 2928, 1719, 1676, 1591, 1157.

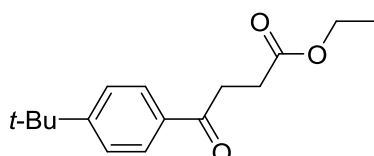

**Ethyl 4-(4-(tert-butyl)phenyl)-4-oxobutanoate (9h).**<sup>[9]</sup>  $^1\text{H}$  NMR (400 MHz,  $\text{CDCl}_3$ )  $\delta$  7.93 (d,  $J = 8.3$  Hz, 2H), 7.48 (d,  $J = 8.3$  Hz, 2H), 4.16 (q,  $J = 7.1$  Hz, 2H), 3.29 (t,  $J =$

6.6 Hz, 2H), 2.75 (t,  $J = 6.6$  Hz, 2H), 1.34 (s, 9H), 1.26 (t,  $J = 7.1$  Hz, 3H);  $^{13}\text{C}$  NMR (100 MHz,  $\text{CDCl}_3$ )  $\delta$  197.7, 172.9, 156.8, 134.0, 127.9, 125.5, 60.5, 35.0, 33.2, 31.0, 28.3, 14.1; MS (ESI-quadrupole): Anal. Calcd. For  $\text{C}_{16}\text{H}_{22}\text{O}_3 + \text{H}^+$ : 263, Found: 263; IR (neat,  $\text{cm}^{-1}$ ):  $\nu$  2964, 2907, 1732, 1683, 1161.

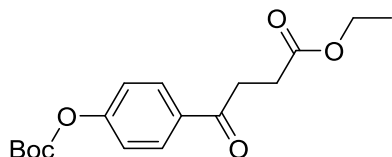

**Ethyl 4-(4-((tert-butoxycarbonyl)oxy)phenyl)-4-oxobutanoate (9i).**  $^1\text{H}$  NMR (400 MHz,  $\text{CDCl}_3$ )  $\delta$  8.02 (d,  $J = 8.7$  Hz, 2H), 7.28 (d,  $J = 8.7$  Hz, 2H), 4.16 (q,  $J = 7.1$  Hz, 2H), 3.29 (t,  $J = 6.6$  Hz, 2H), 2.75 (t,  $J = 6.6$  Hz, 2H), 1.57 (s, 9H), 1.26 (t,  $J = 7.1$  Hz, 3H);  $^{13}\text{C}$  NMR (100 MHz,  $\text{CDCl}_3$ )  $\delta$  196.8, 172.7, 154.6, 150.9, 133.9, 129.5, 121.2, 84.1, 60.5, 33.2, 28.1, 27.5, 14.1; MS (ESI-quadrupole): Anal. Calcd. For  $\text{C}_{17}\text{H}_{22}\text{O}_6 + \text{H}^+$ : 323, Found: 323; IR (neat,  $\text{cm}^{-1}$ ):  $\nu$  2982, 2935, 1757, 1732, 1600, 1138.

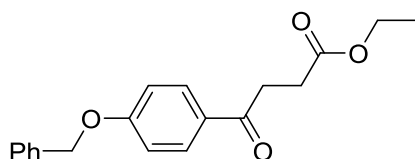

**Ethyl 4-(4-(benzyloxy)phenyl)-4-oxobutanoate (9j).**  $^1\text{H}$  NMR (400 MHz,  $\text{CDCl}_3$ )  $\delta$  7.95 (d,  $J = 8.8$  Hz, 2H), 7.43 - 7.31 (m, 5H), 7.00 (d,  $J = 8.8$  Hz, 2H), 5.11 (s, 2H), 4.15 (q,  $J = 7.1$  Hz, 2H), 3.24 (t,  $J = 6.8$  Hz, 2H), 2.73 (t,  $J = 6.8$  Hz, 2H), 1.25 (t,  $J = 7.1$  Hz, 3H);  $^{13}\text{C}$  NMR (100 MHz,  $\text{CDCl}_3$ )  $\delta$  196.5, 172.9, 162.6, 136.1, 130.2, 129.8, 128.6, 128.1, 127.4, 114.5, 70.0, 60.5, 32.9, 28.3, 14.1; MS (ESI-quadrupole): Anal. Calcd. For  $\text{C}_{19}\text{H}_{20}\text{O}_4 + \text{H}^+$ : 313, Found: 313; IR (neat,  $\text{cm}^{-1}$ ):  $\nu$  3034, 2931, 1728, 1663, 1598, 1166.

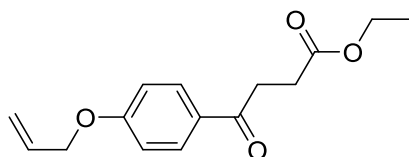

**Ethyl 4-(4-(allyloxy)phenyl)-4-oxobutanoate (9k).**  $^1\text{H}$  NMR (400 MHz,  $\text{CDCl}_3$ )  $\delta$  7.95 (d,  $J = 8.9$  Hz, 2H), 6.94 (d,  $J = 8.9$  Hz, 2H), 6.09 - 6.00 (m, 1H), 5.44 - 5.30 (m,



2H), 4.60 (d,  $J = 5.2$  Hz, 2H), 4.15 (q,  $J = 7.1$  Hz, 2H), 3.26 (t,  $J = 6.7$  Hz, 2H), 2.73 (t,  $J = 6.7$  Hz, 2H), 1.26 (t,  $J = 7.1$  Hz, 3H);  $^{13}\text{C}$  NMR (100 MHz,  $\text{CDCl}_3$ )  $\delta$  196.5, 172.9, 162.4, 132.4, 130.1, 129.7, 118.0, 114.3, 68.7, 60.5, 32.9, 28.3, 14.1; MS (ESI-quadrupole): Anal. Calcd. For  $\text{C}_{15}\text{H}_{18}\text{O}_4 + \text{H}^+$ : 263, Found: 263; IR (neat,  $\text{cm}^{-1}$ ):  $\nu$  2982, 2917, 1730, 1677, 1599, 1165.

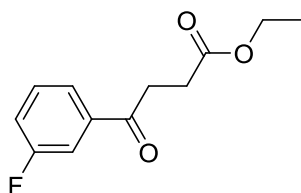

**Ethyl 4-(3-fluorophenyl)-4-oxobutanoate (9l).**  $^1\text{H}$  NMR (400 MHz,  $\text{CDCl}_3$ )  $\delta$  7.78 - 7.76 (m, 1H), 7.67 - 7.65 (m, 1H), 7.48 - 7.43 (m, 1H), 7.29 - 7.25 (m, 1H), 4.16 (q,  $J = 7.1$  Hz, 2H), 3.29 (t,  $J = 6.6$  Hz, 2H), 2.76 (t,  $J = 6.6$  Hz, 2H), 1.27 (t,  $J = 7.1$  Hz, 3H);  $^{13}\text{C}$  NMR (100 MHz,  $\text{CDCl}_3$ )  $\delta$  196.9 (d,  $J = 2.0$  Hz), 172.6, 162.8 (d,  $J = 248.4$  Hz), 138.6 (d,  $J = 6.0$  Hz), 130.2 (d,  $J = 7.6$  Hz), 123.7 (d,  $J = 3.0$  Hz), 120.2 (d,  $J = 21.3$  Hz), 114.7 (d,  $J = 22.2$  Hz), 60.7, 33.5, 28.1, 14.1; MS (ESI-quadrupole): Anal. Calcd. For  $\text{C}_{12}\text{H}_{13}\text{FO}_3 + \text{H}^+$ : 225, Found: 225; IR (neat,  $\text{cm}^{-1}$ ):  $\nu$  2983, 2933, 1730, 1689, 1589, 1149.

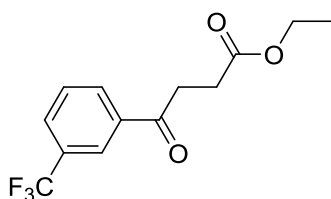

**Ethyl 4-oxo-4-(3-(trifluoromethyl)phenyl)butanoate (9m).**<sup>[7]</sup>  $^1\text{H}$  NMR (400 MHz,  $\text{CDCl}_3$ )  $\delta$  8.25 - 8.23 (m, 1H), 8.23 - 8.22 (m, 1H), 8.18 - 8.16 (m, 1H), 7.84 - 7.82 (m, 1H), 7.64 - 7.60 (m, 1H), 4.17 (q,  $J = 7.1$  Hz, 2H), 3.34 (t,  $J = 6.4$  Hz, 2H), 2.79 (t,  $J = 6.4$  Hz, 2H), 1.27 (t,  $J = 7.1$  Hz, 3H);  $^{13}\text{C}$  NMR (100 MHz,  $\text{CDCl}_3$ )  $\delta$  196.8, 172.6, 137.0, 131.7, 131.4, 131.1, 131.0, 130.7, 129.59, 129.56, 129.52, 129.48, 129.3, 127.7, 124.97, 124.8 (q, 300Hz), 122.3, 60.7, 33.4, 28.1, 14.1; MS (ESI-quadrupole): Anal. Calcd. For  $\text{C}_{13}\text{H}_{13}\text{F}_3\text{O}_3 + \text{H}^+$ : 275, Found: 275; IR (neat,  $\text{cm}^{-1}$ ):  $\nu$  2984, 1731, 1694, 1328, 1123.

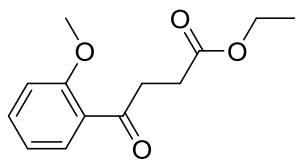

**Ethyl 4-(2-methoxyphenyl)-4-oxobutanoate (9n).**  $^1\text{H}$  NMR (400 MHz,  $\text{CDCl}_3$ )  $\delta$  7.77 - 7.74 (m, 1H), 7.49 - 7.44 (m, 1H), 7.02 - 6.96 (m, 2H), 4.15 (q,  $J = 7.1$  Hz, 2H), 3.92 (s, 3H), 3.32 (t,  $J = 6.7$  Hz, 2H), 2.70 (t,  $J = 6.7$  Hz, 2H), 1.26 (t,  $J = 7.1$  Hz, 3H);  $^{13}\text{C}$  NMR (100 MHz,  $\text{CDCl}_3$ )  $\delta$  199.9, 173.1, 158.8, 133.6, 130.4, 127.5, 120.6, 111.5, 60.4, 55.4, 38.7, 28.7, 14.1; MS (ESI-quadrupole): Anal. Calcd. For  $\text{C}_{13}\text{H}_{16}\text{O}_4 + \text{H}^+$ : 237, Found: 237; IR (neat,  $\text{cm}^{-1}$ ):  $\nu$  2980, 2941, 1730, 1672, 1597, 1159.

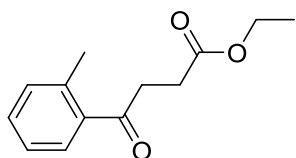

**Ethyl 4-oxo-4-(o-tolyl)butanoate (9o).**  $^1\text{H}$  NMR (400 MHz,  $\text{CDCl}_3$ )  $\delta$  7.72 - 7.70 (m, 1H), 7.40 - 7.36 (m, 1H), 7.29 - 7.24 (m, 2H), 4.16 (q,  $J = 7.1$  Hz, 2H), 3.22 (t,  $J = 6.6$  Hz, 2H), 2.74 (t,  $J = 6.6$  Hz, 2H), 2.49 (s, 3H), 1.27 (t,  $J = 7.1$  Hz, 3H);  $^{13}\text{C}$  NMR (100 MHz,  $\text{CDCl}_3$ )  $\delta$  202.1, 172.9, 138.1, 137.5, 131.9, 131.4, 128.5, 125.7, 60.6, 36.1, 28.5, 21.2, 14.2; MS (ESI-quadrupole): Anal. Calcd. For  $\text{C}_{13}\text{H}_{16}\text{O}_4 + \text{H}^+$ : 221, Found: 221; IR (neat,  $\text{cm}^{-1}$ ):  $\nu$  2980, 2929, 1731, 1686, 1162.

## NMR Spectroscopic Data for Products

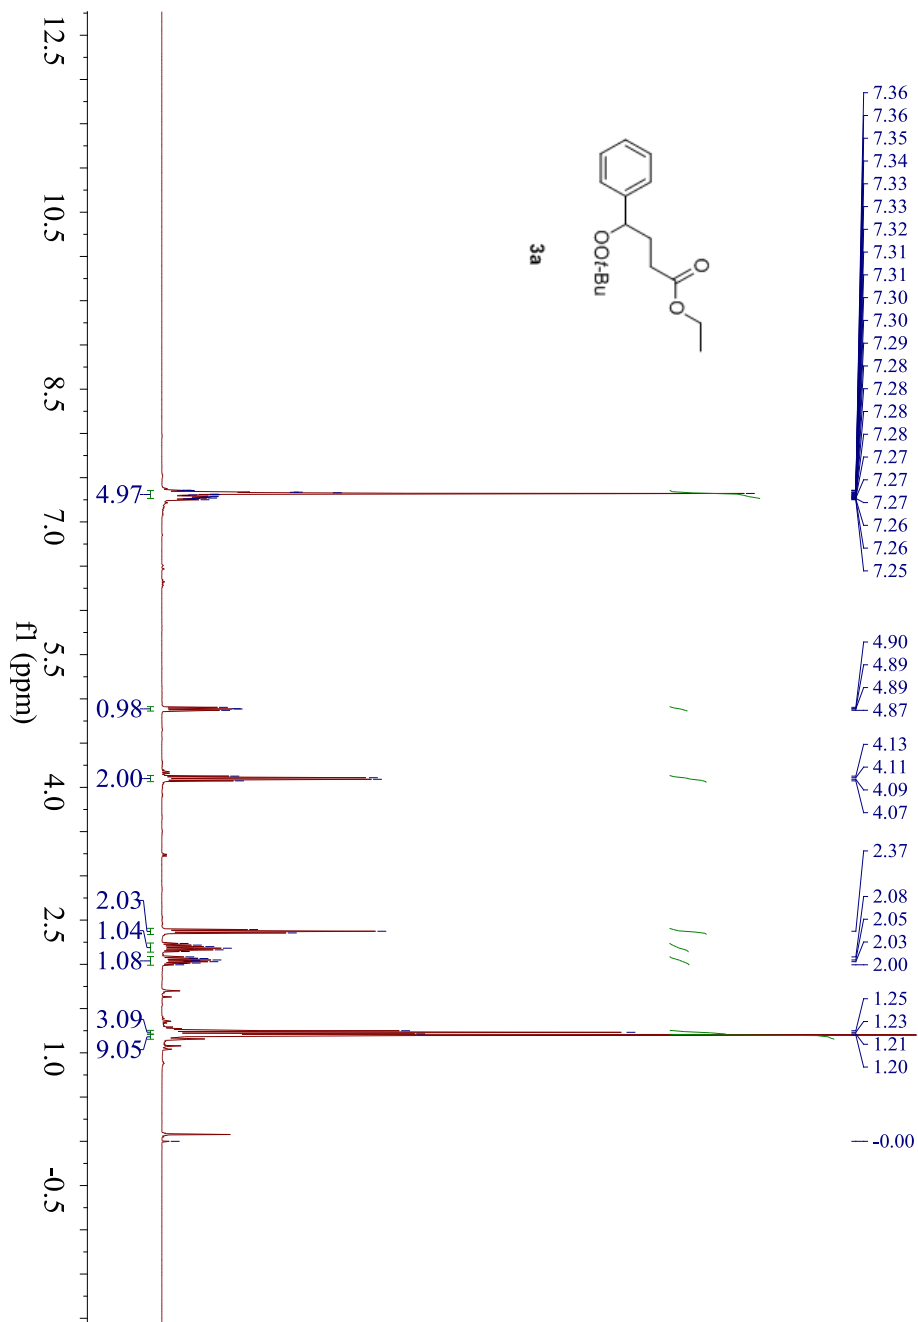

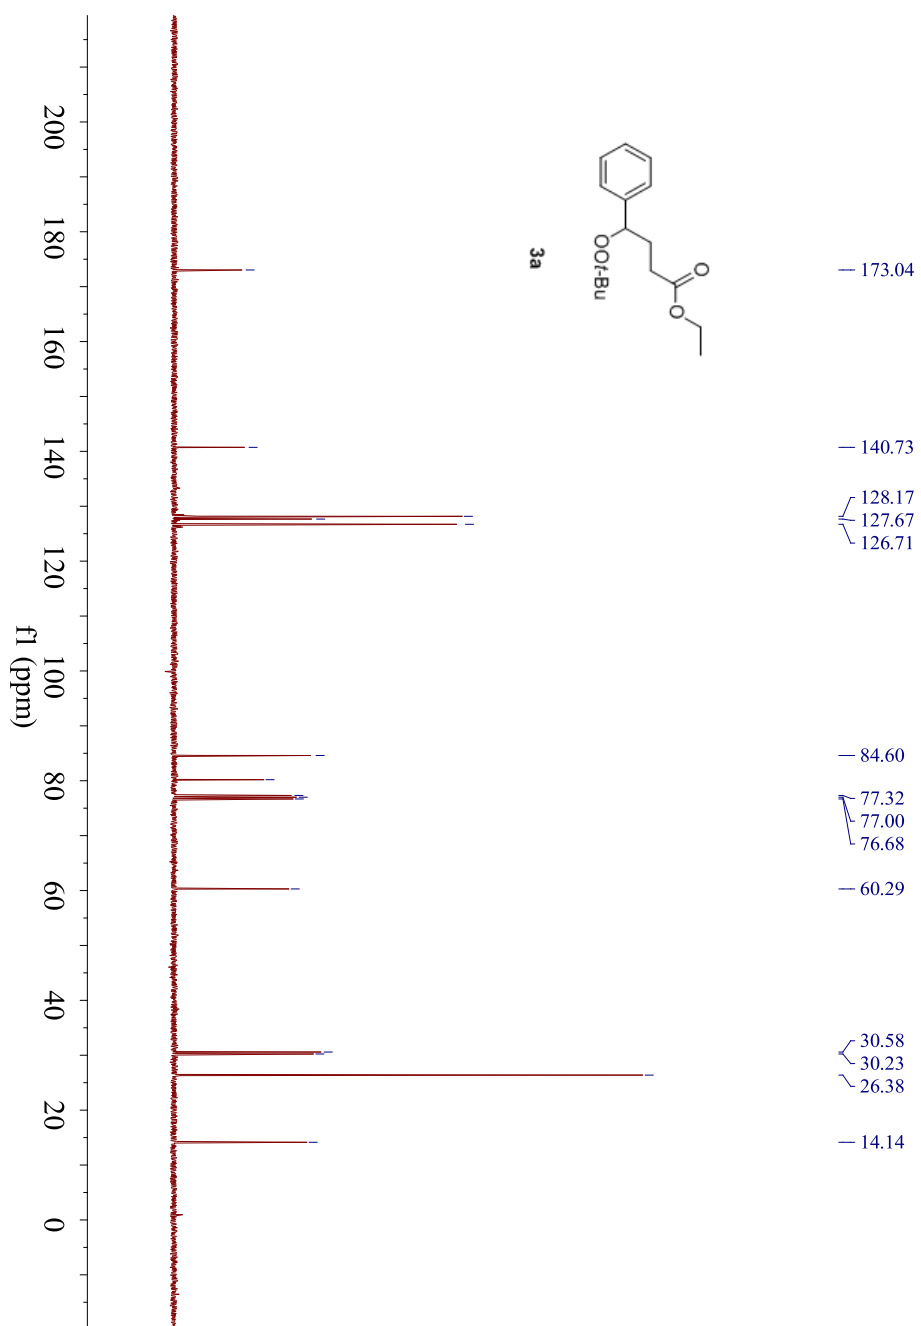

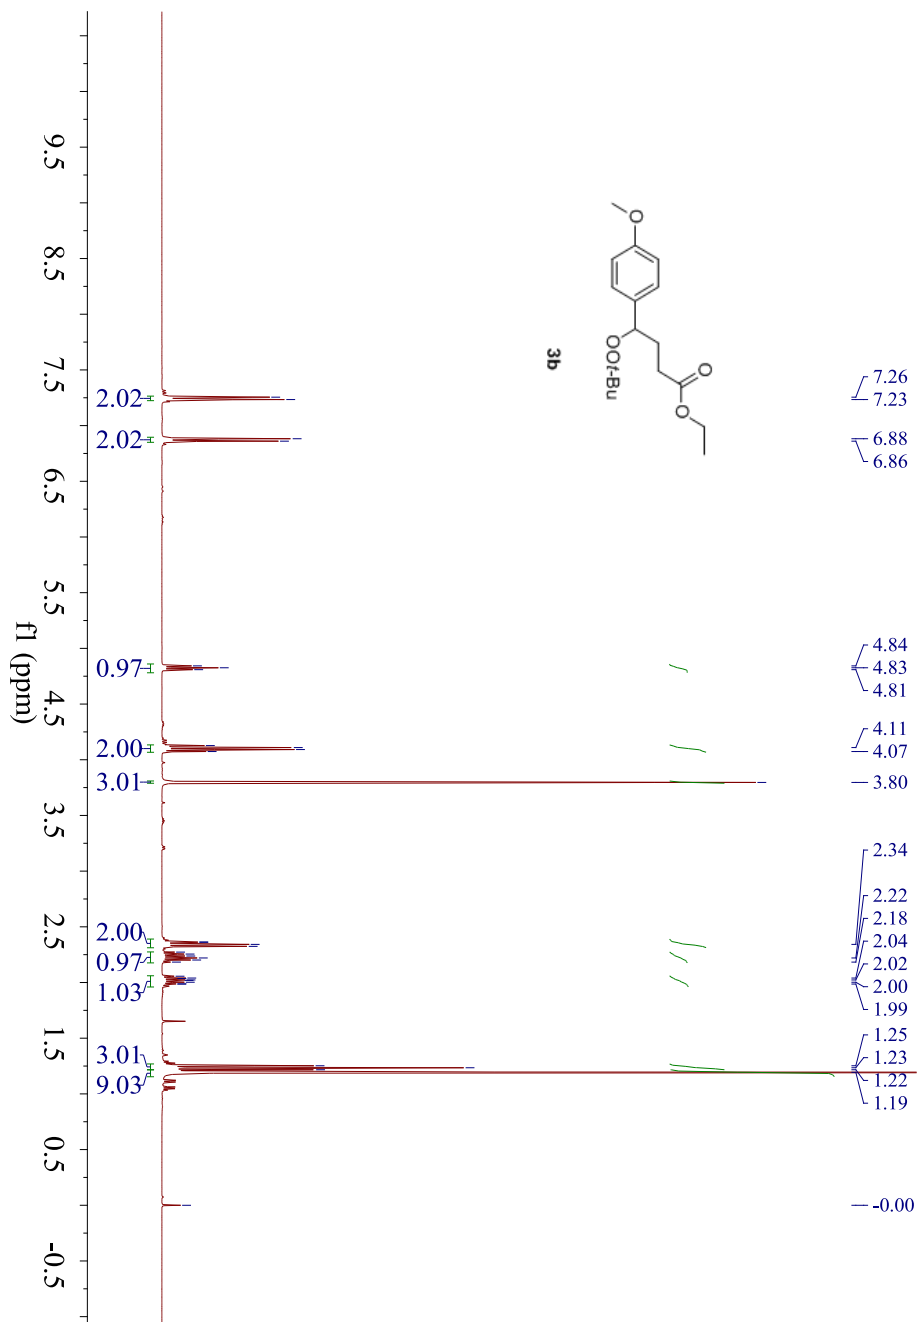

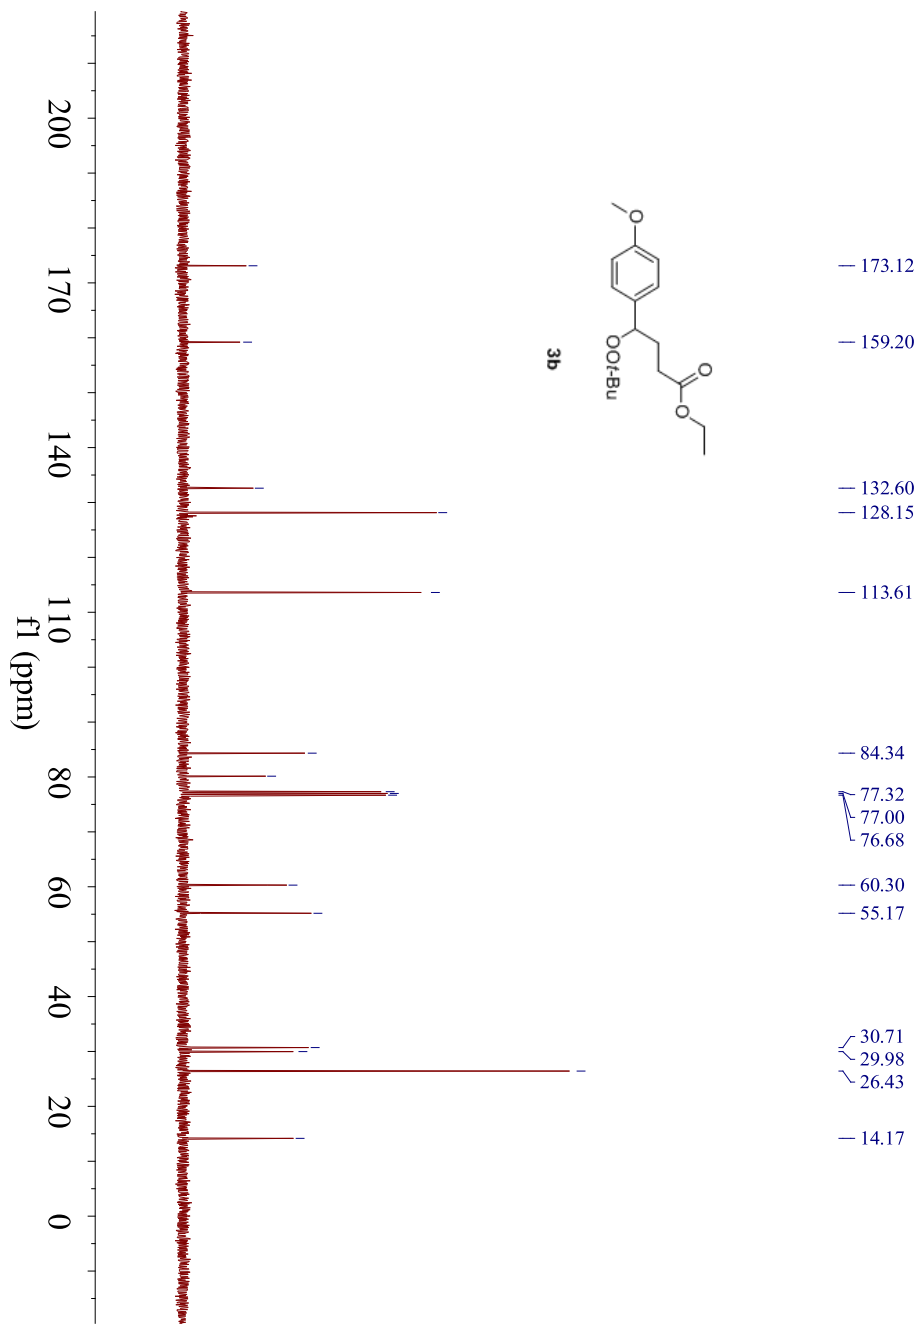

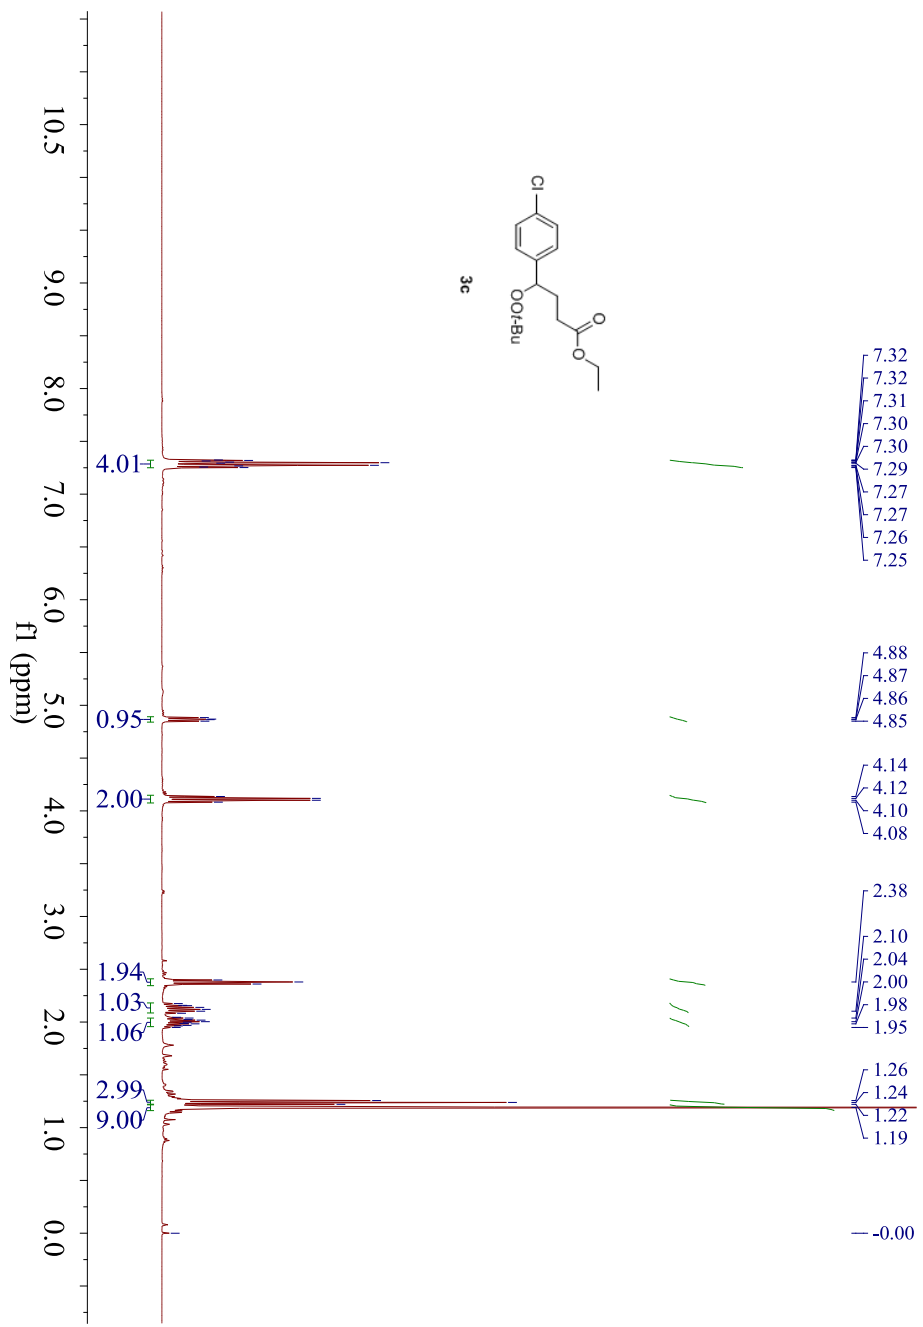

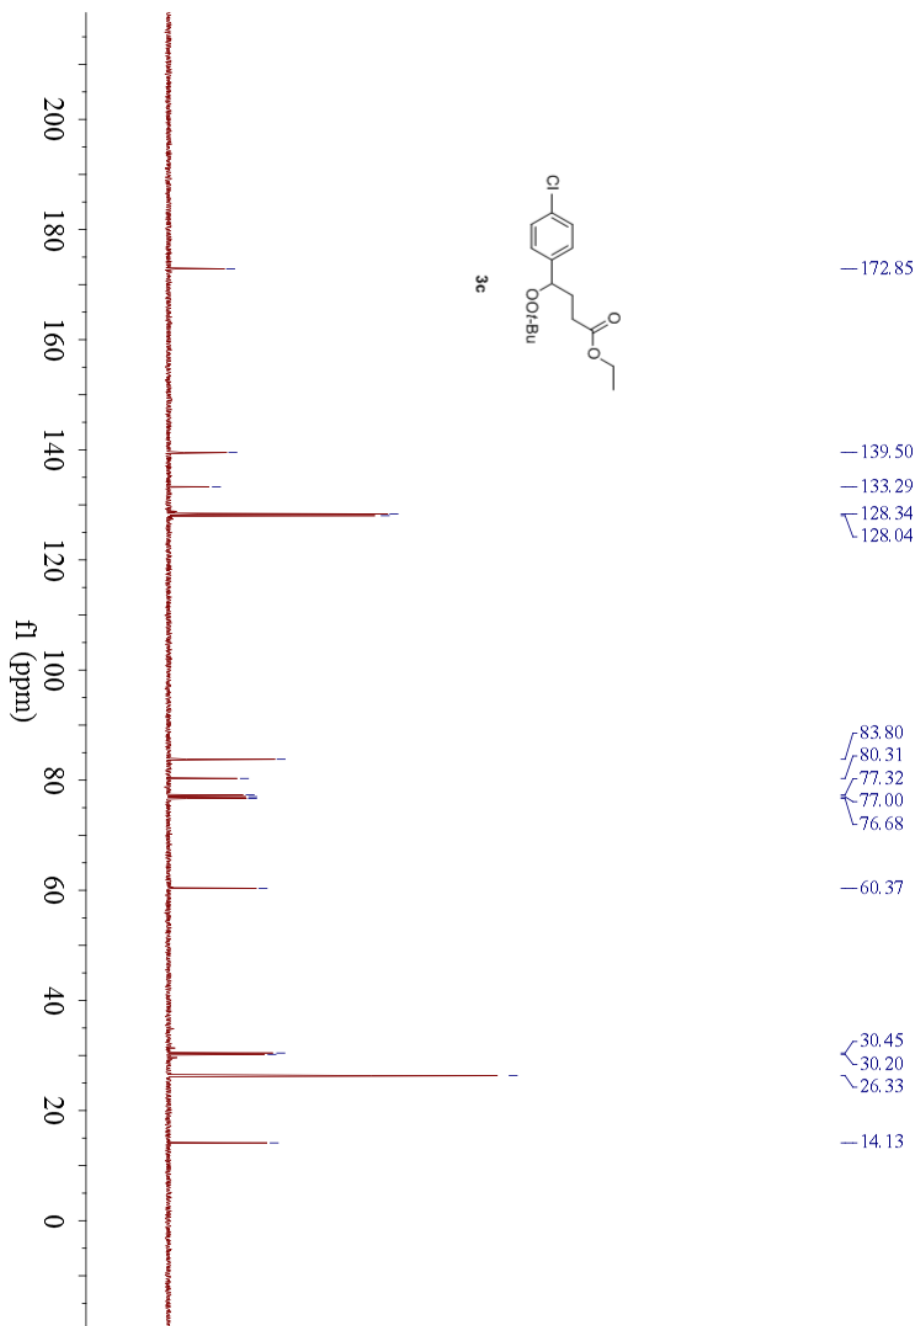



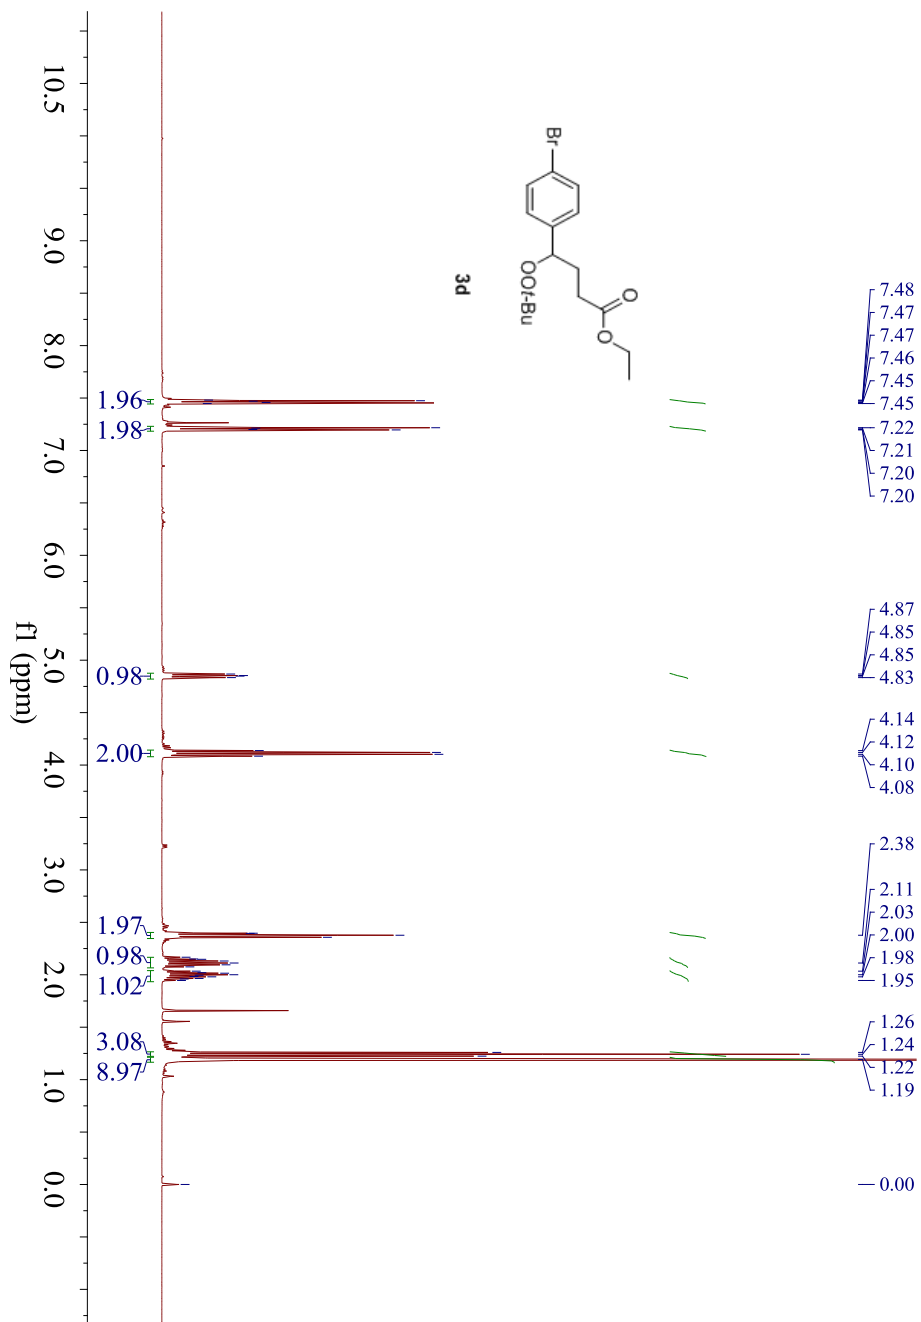

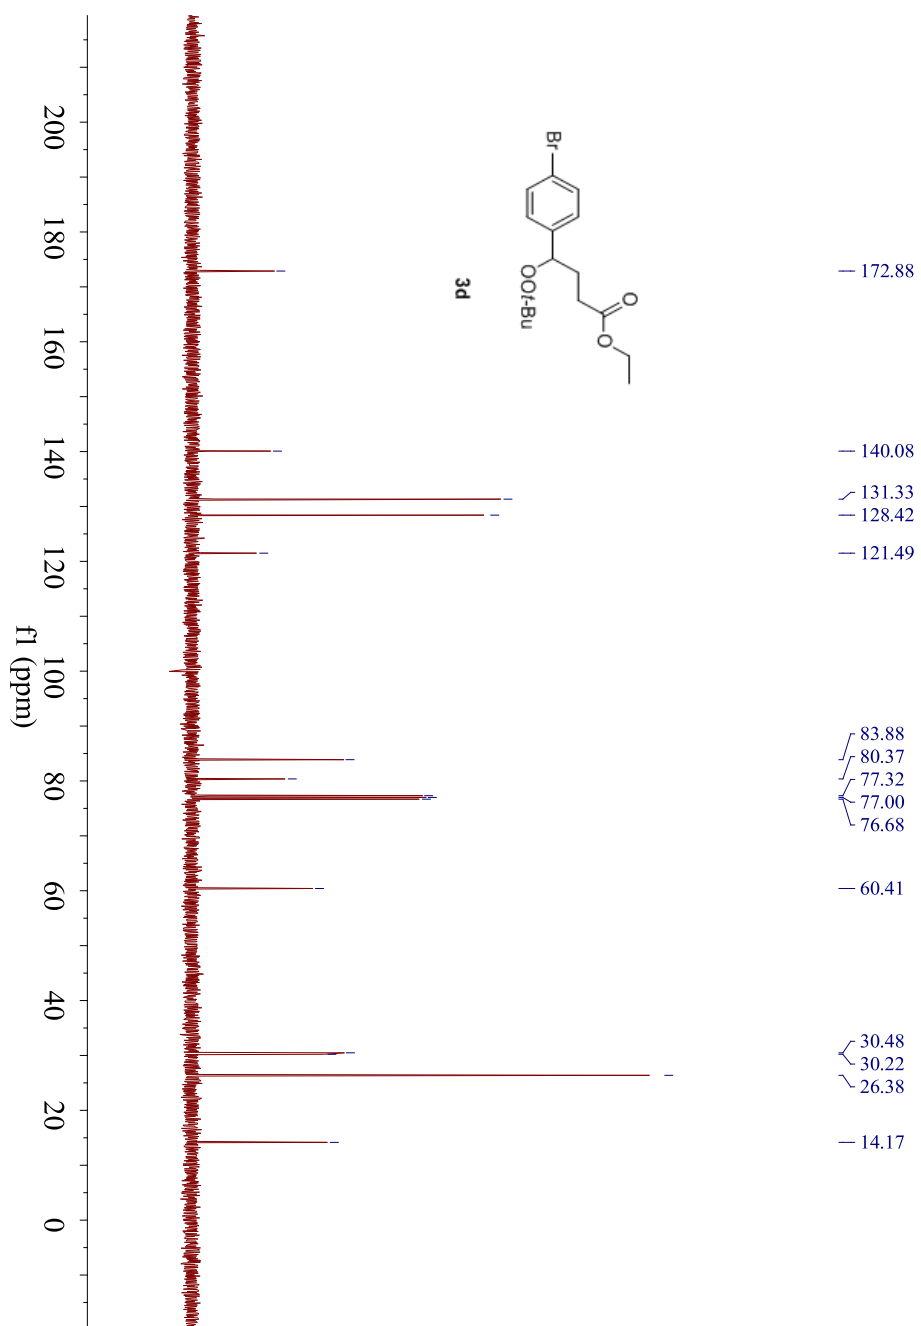

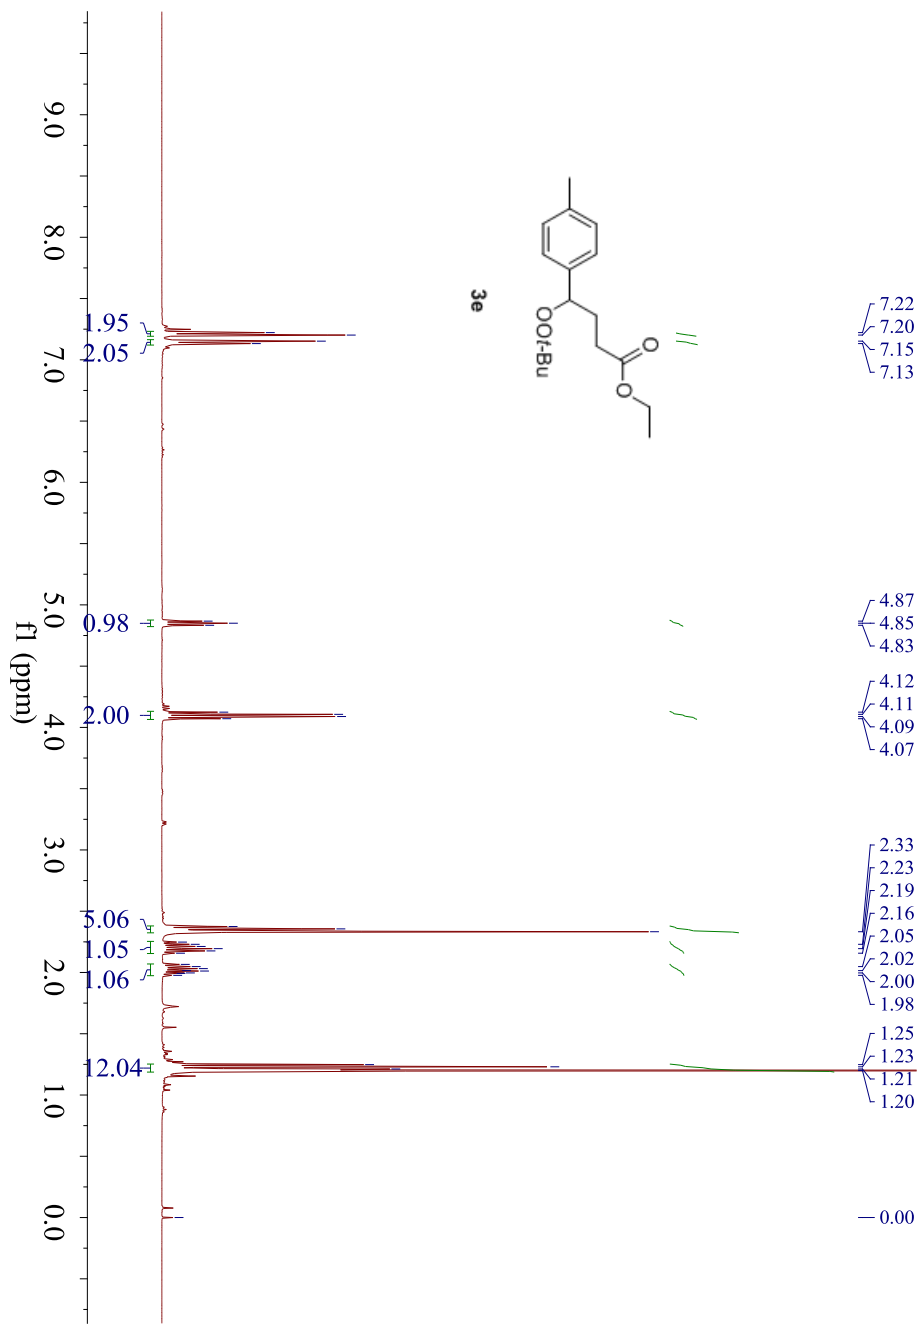

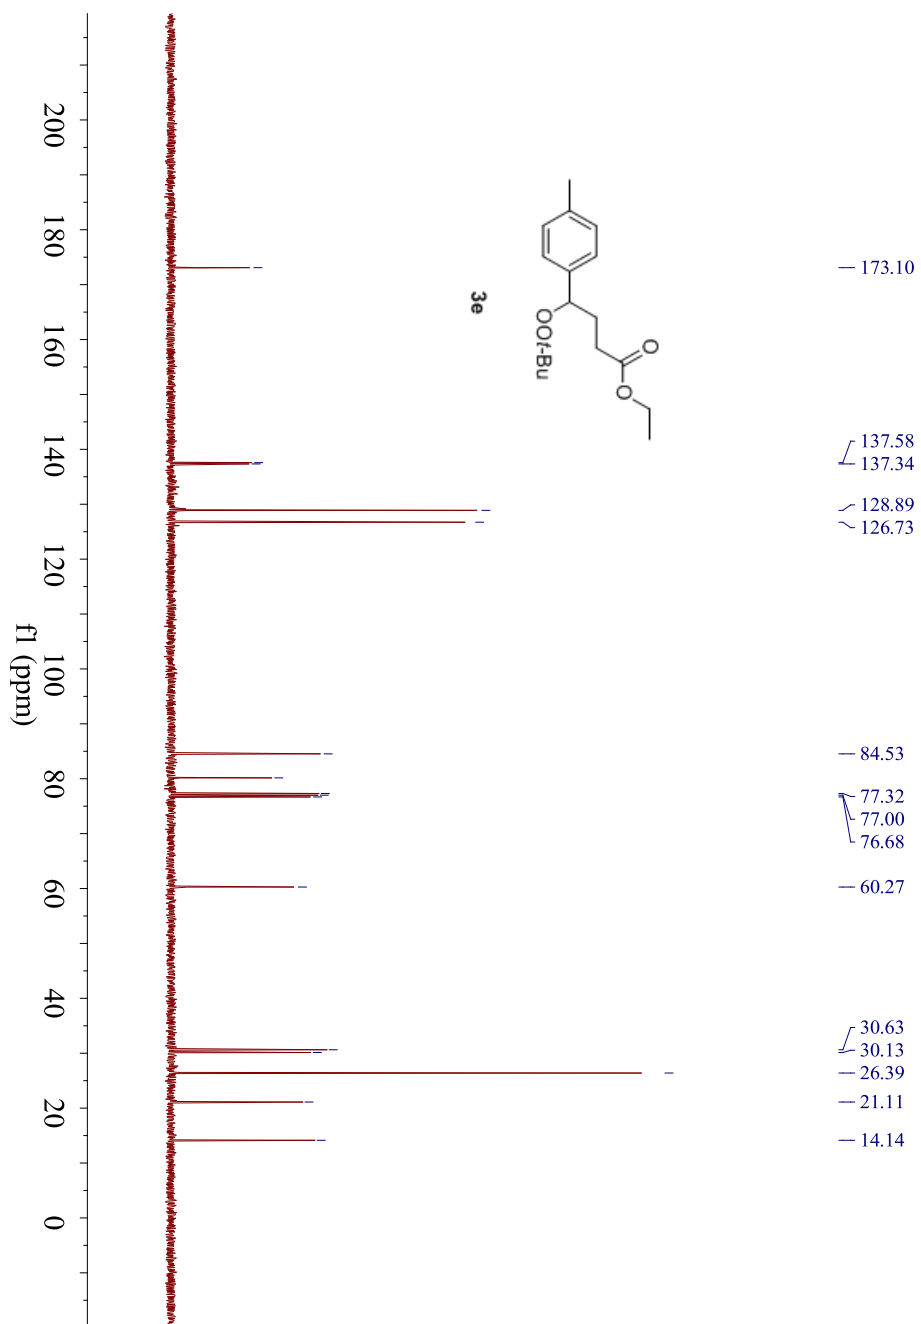

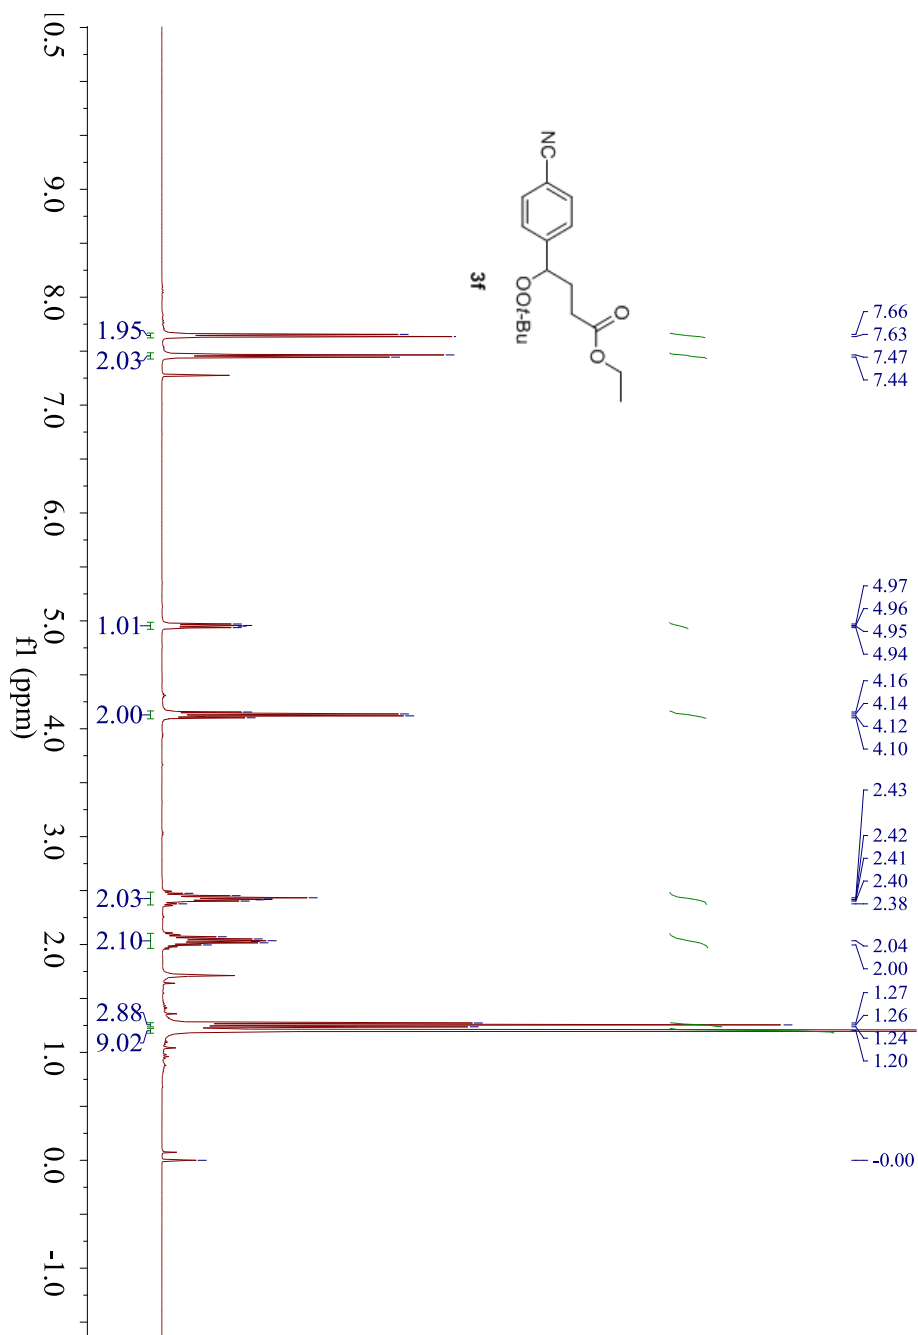

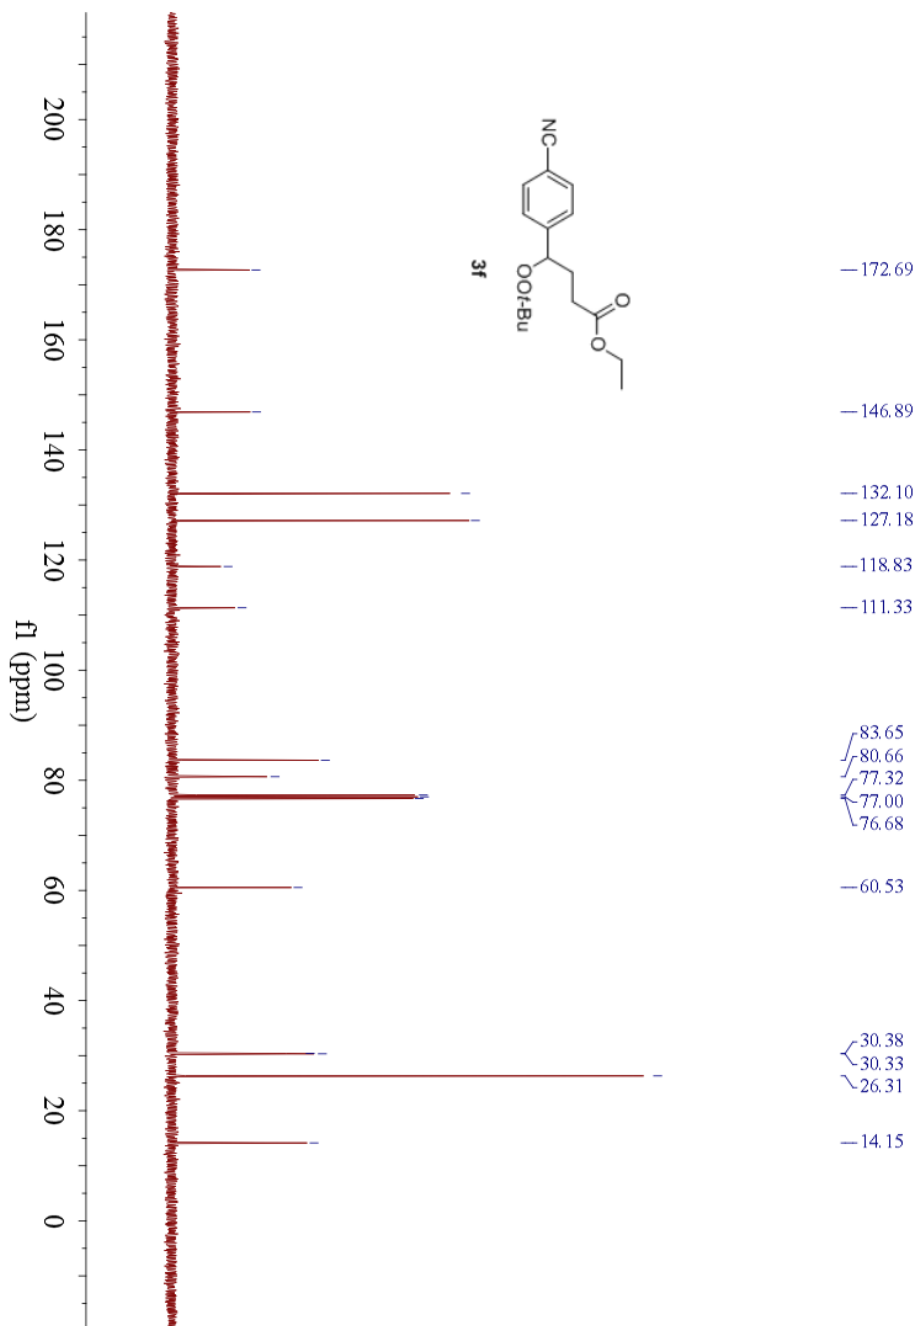

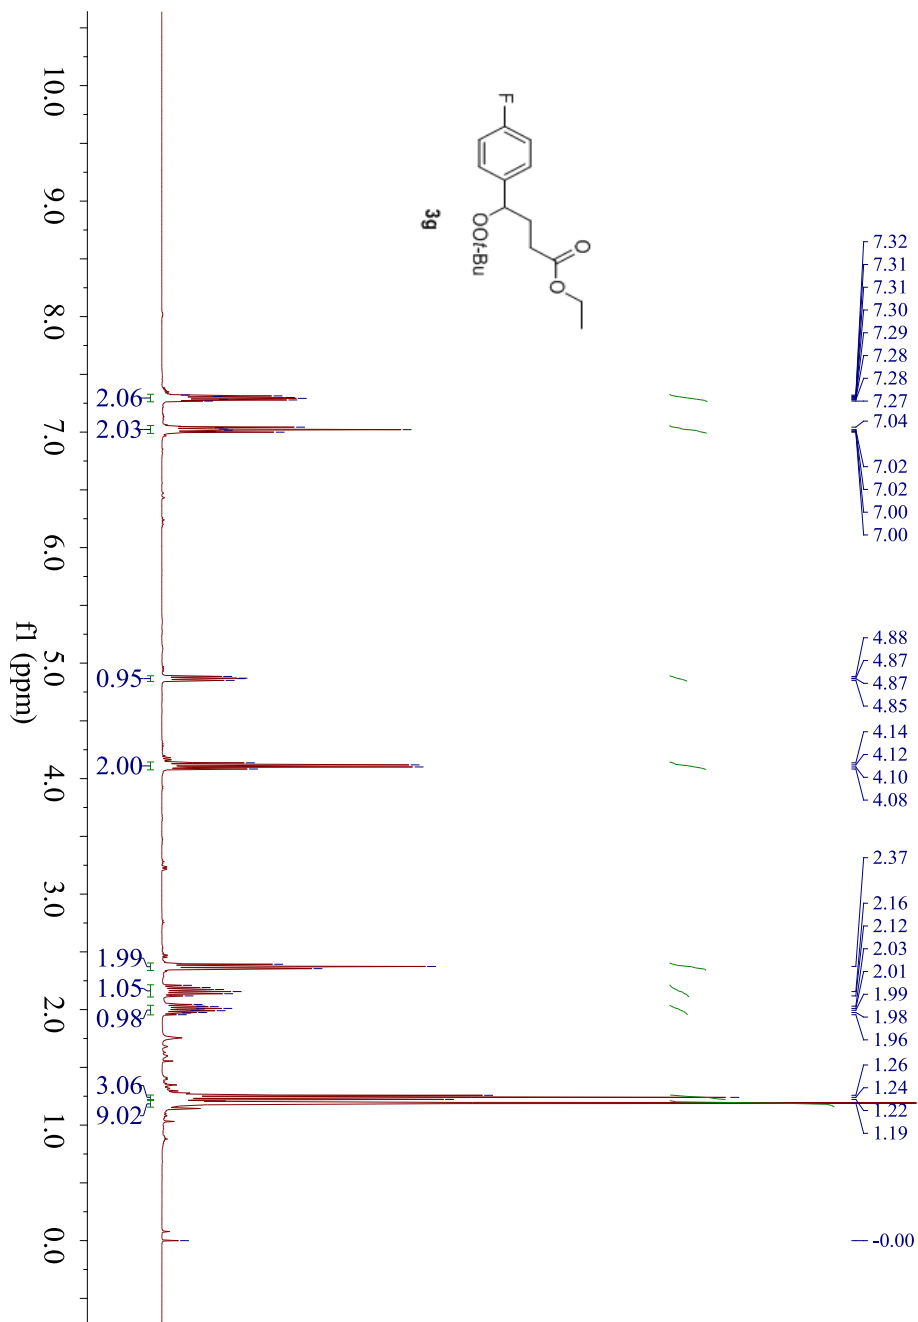

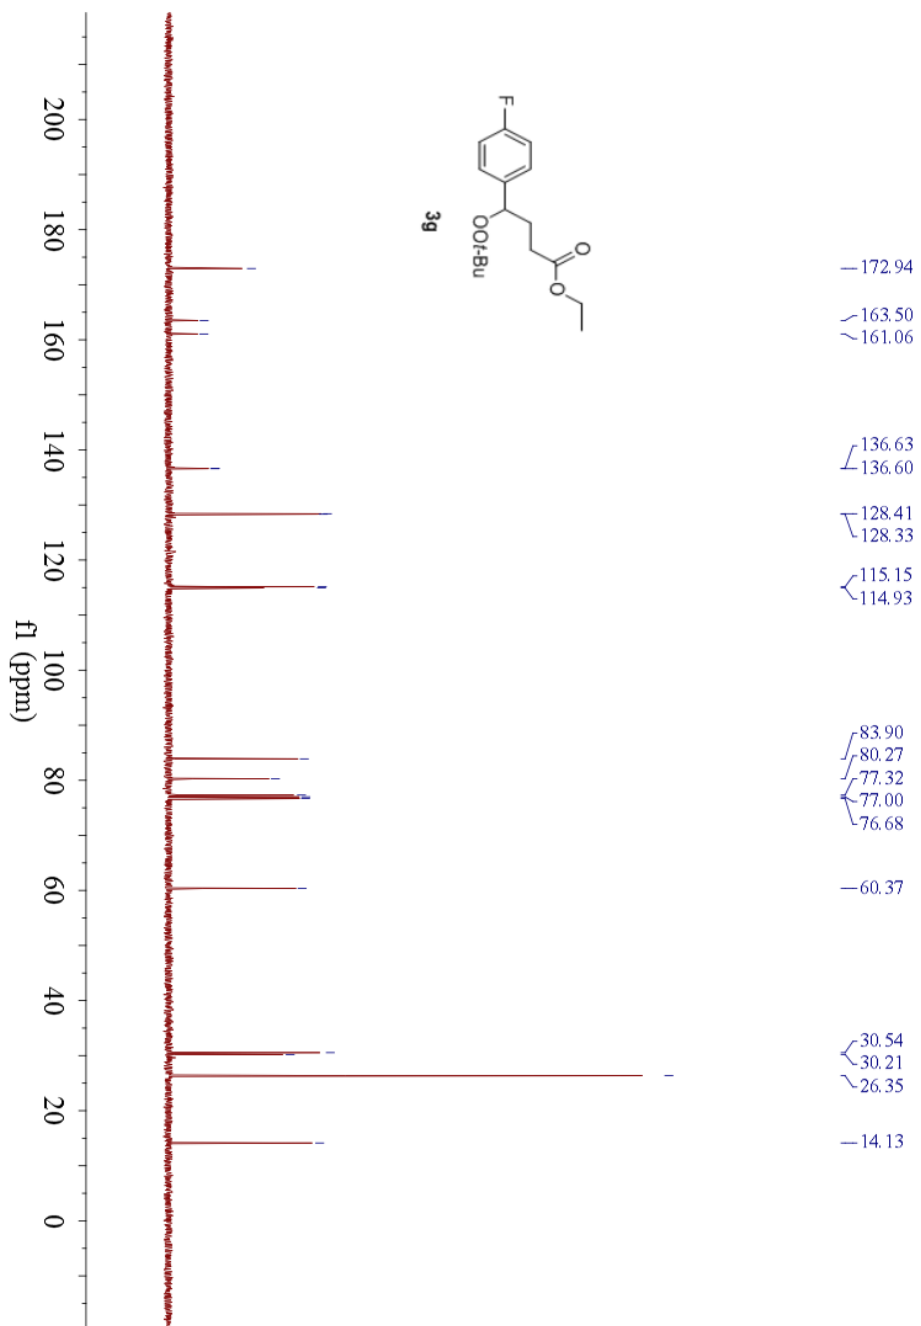



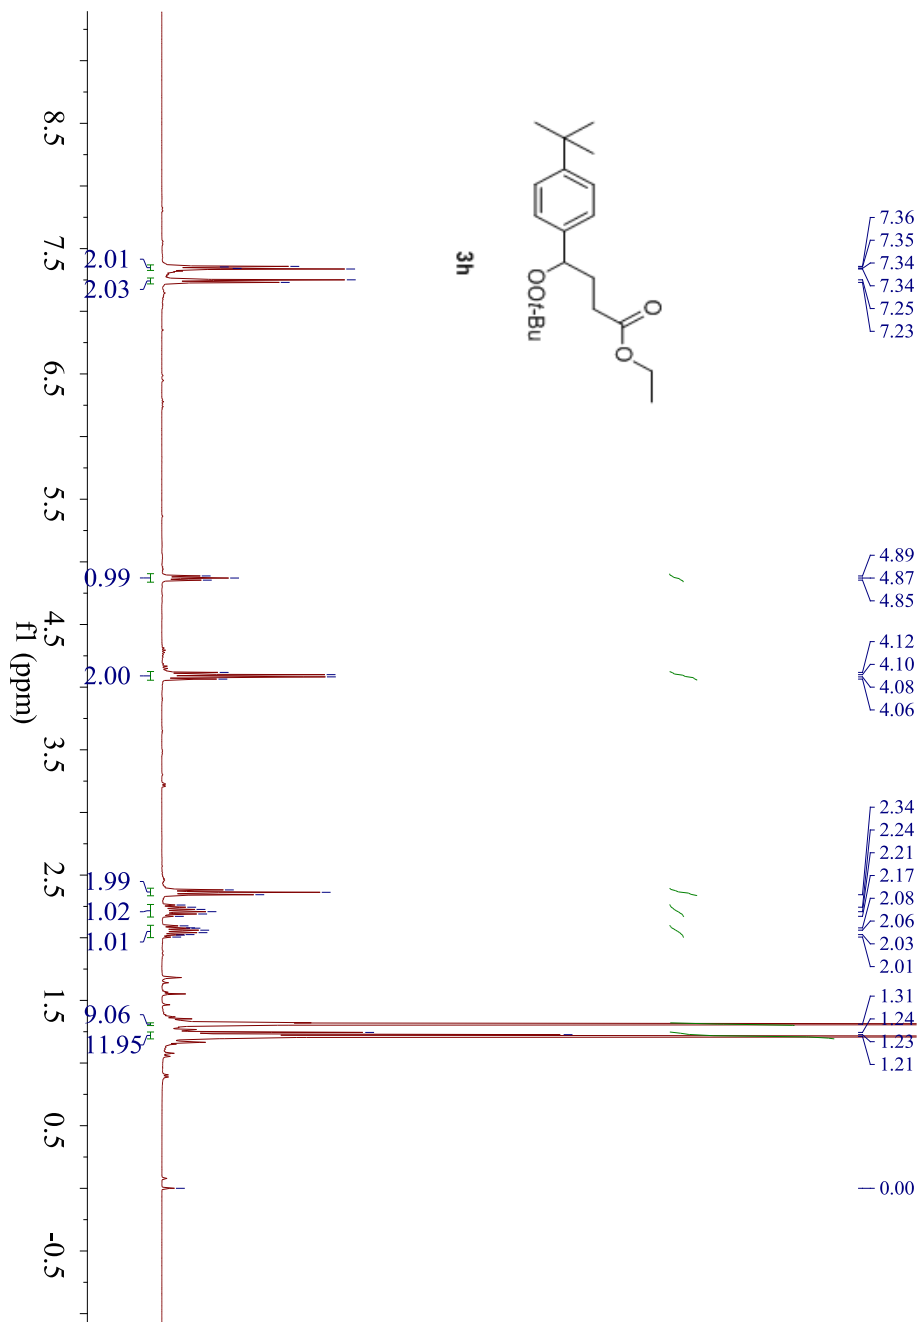

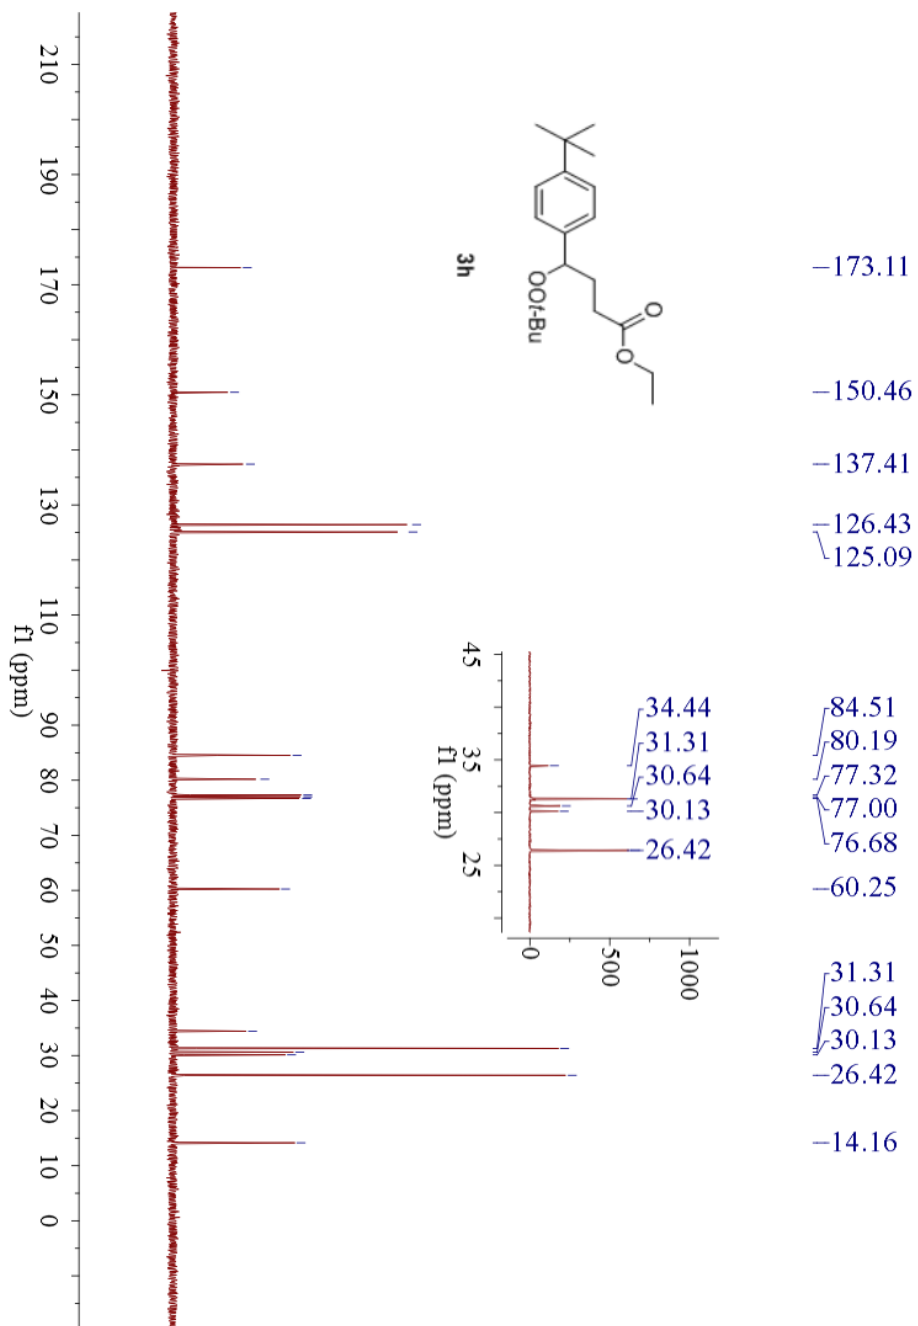

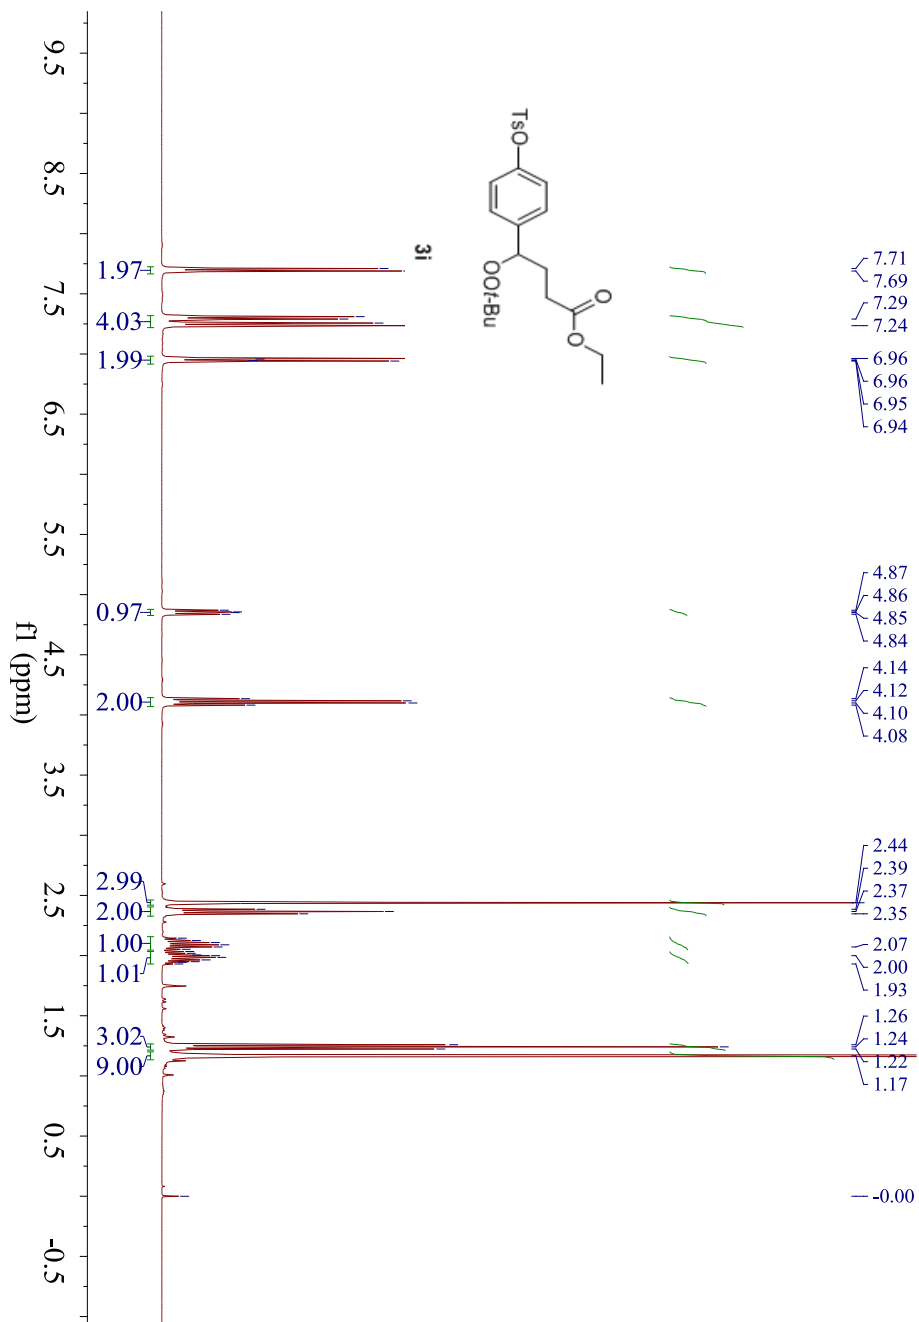

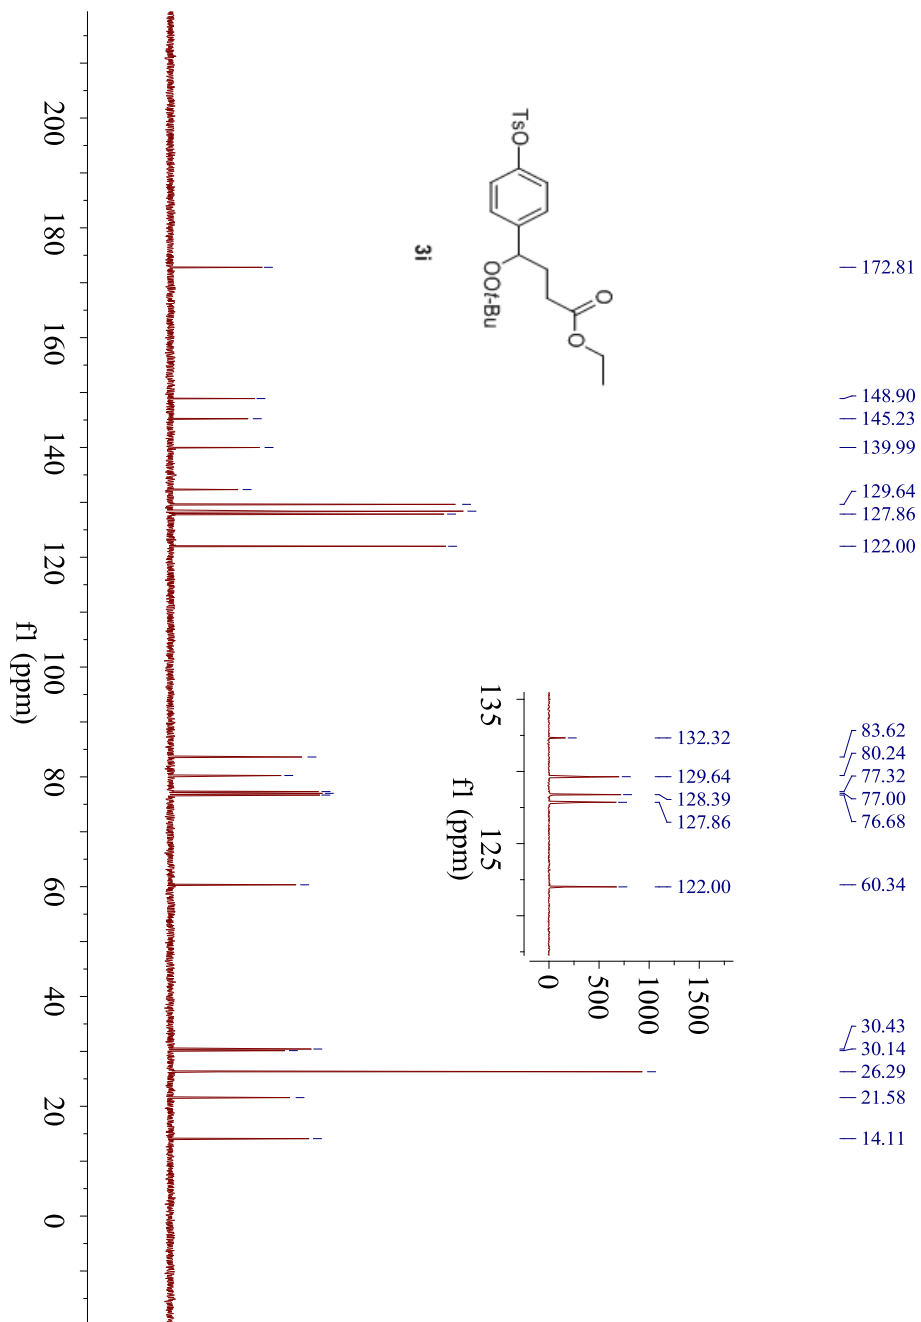

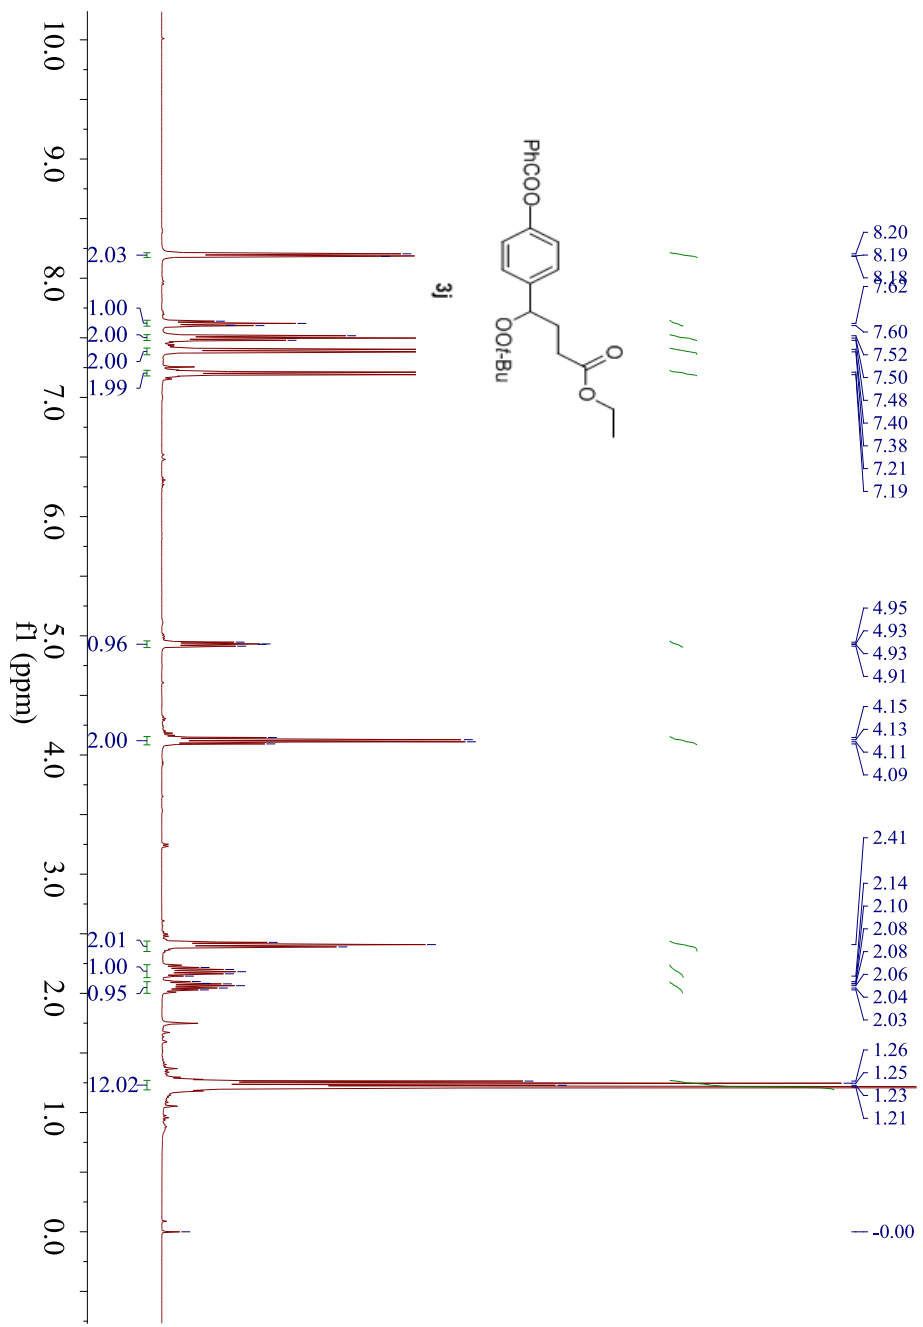

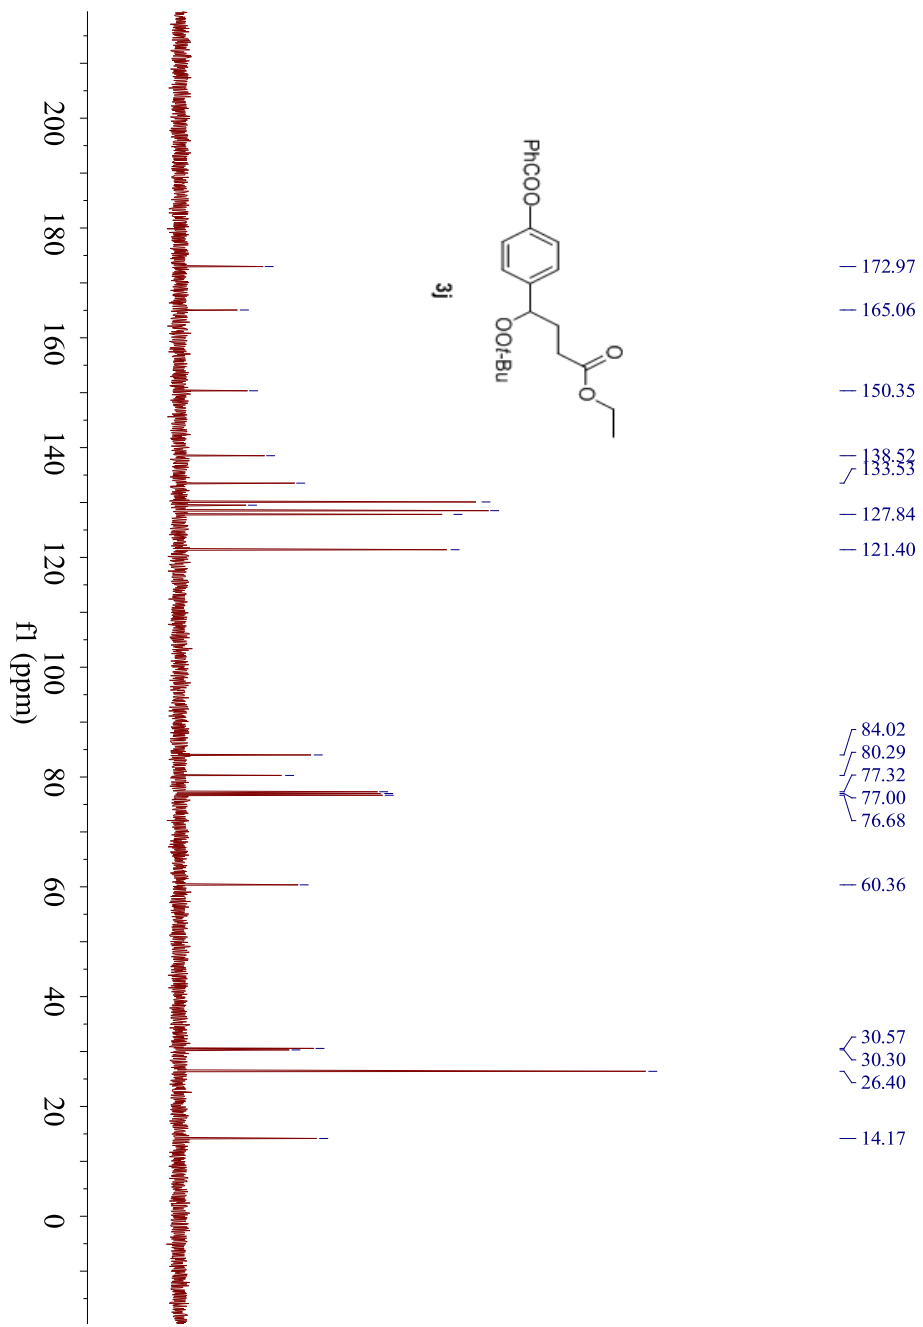

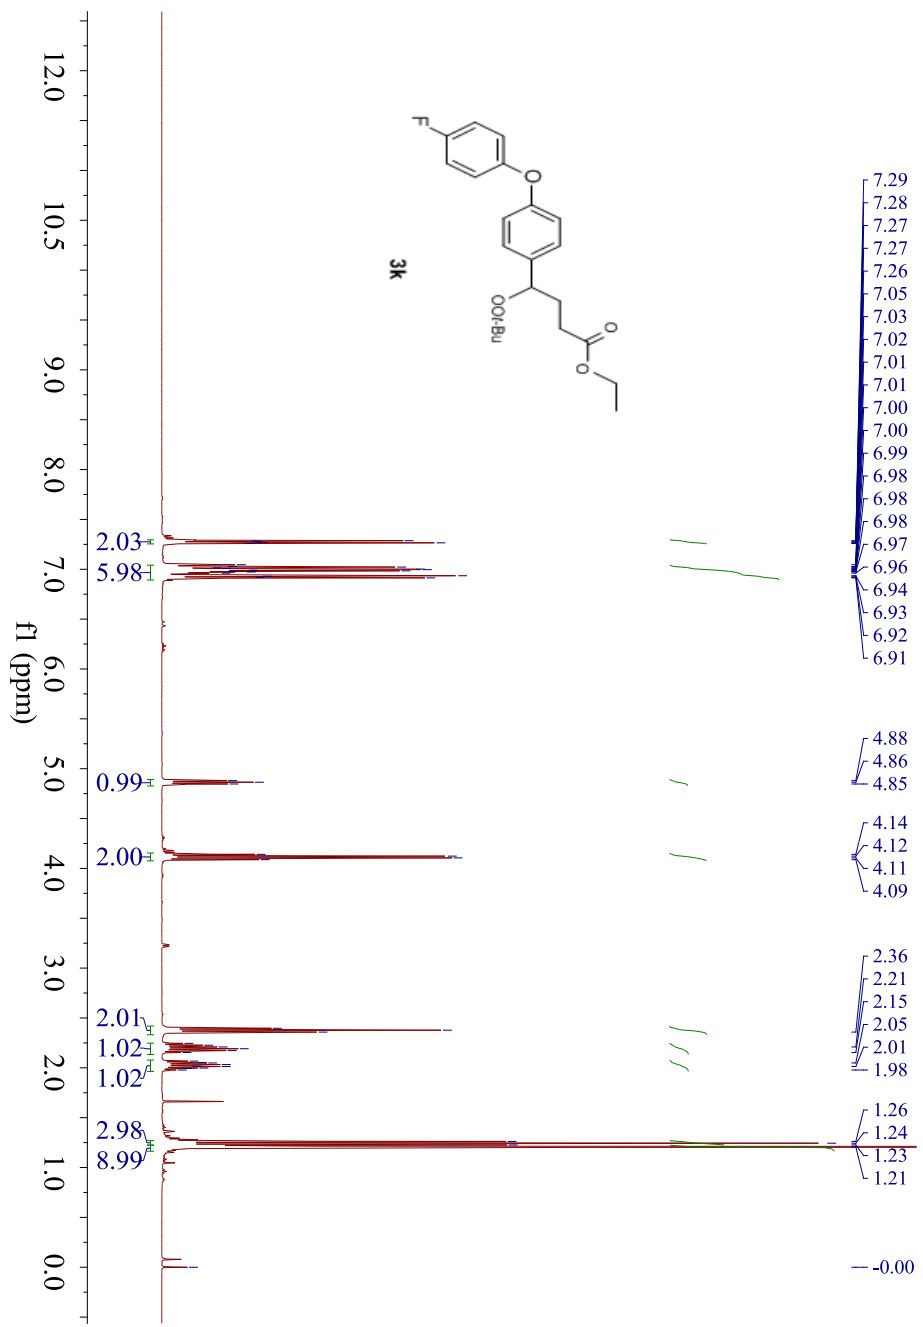

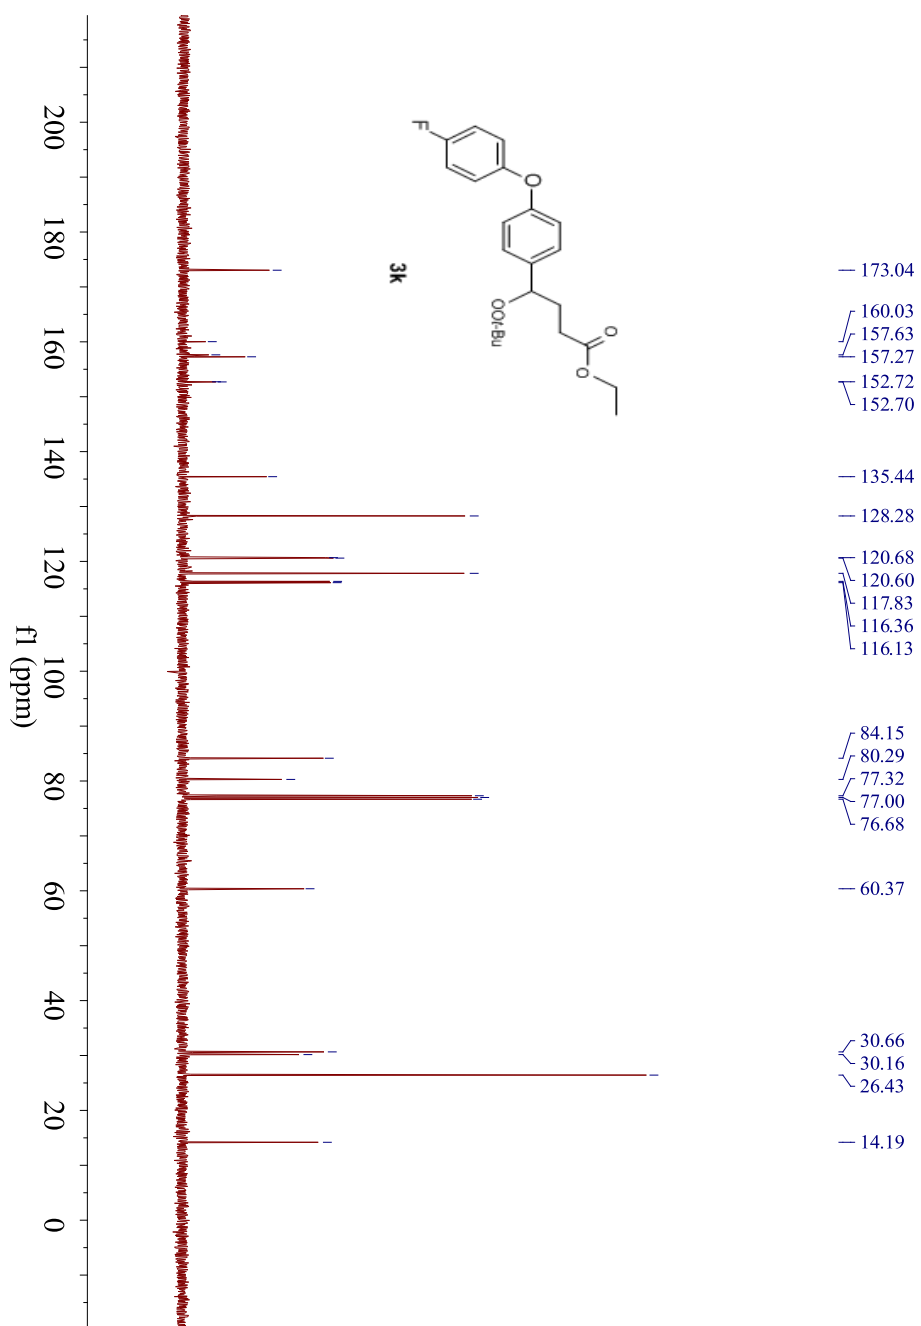



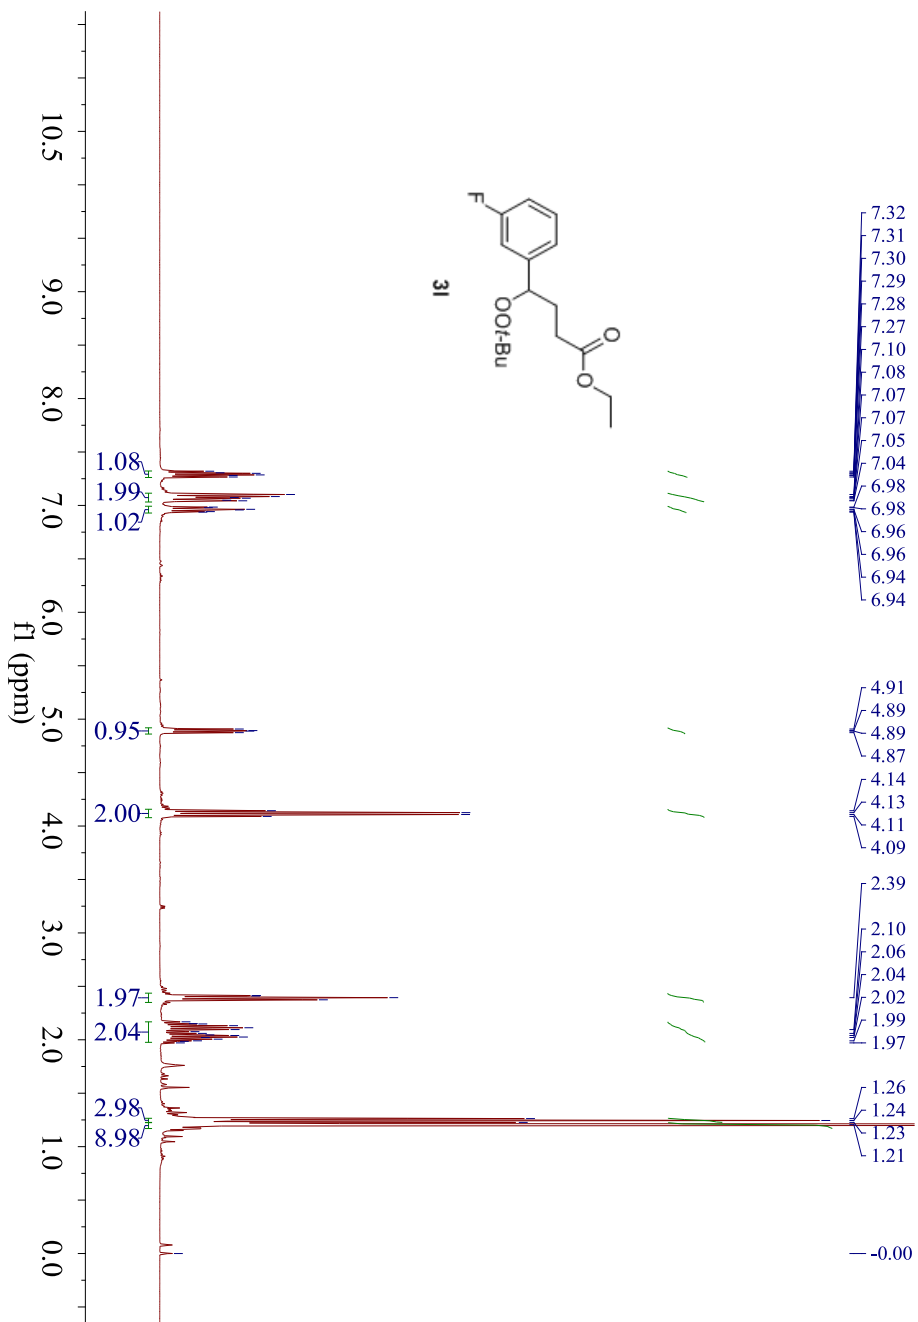

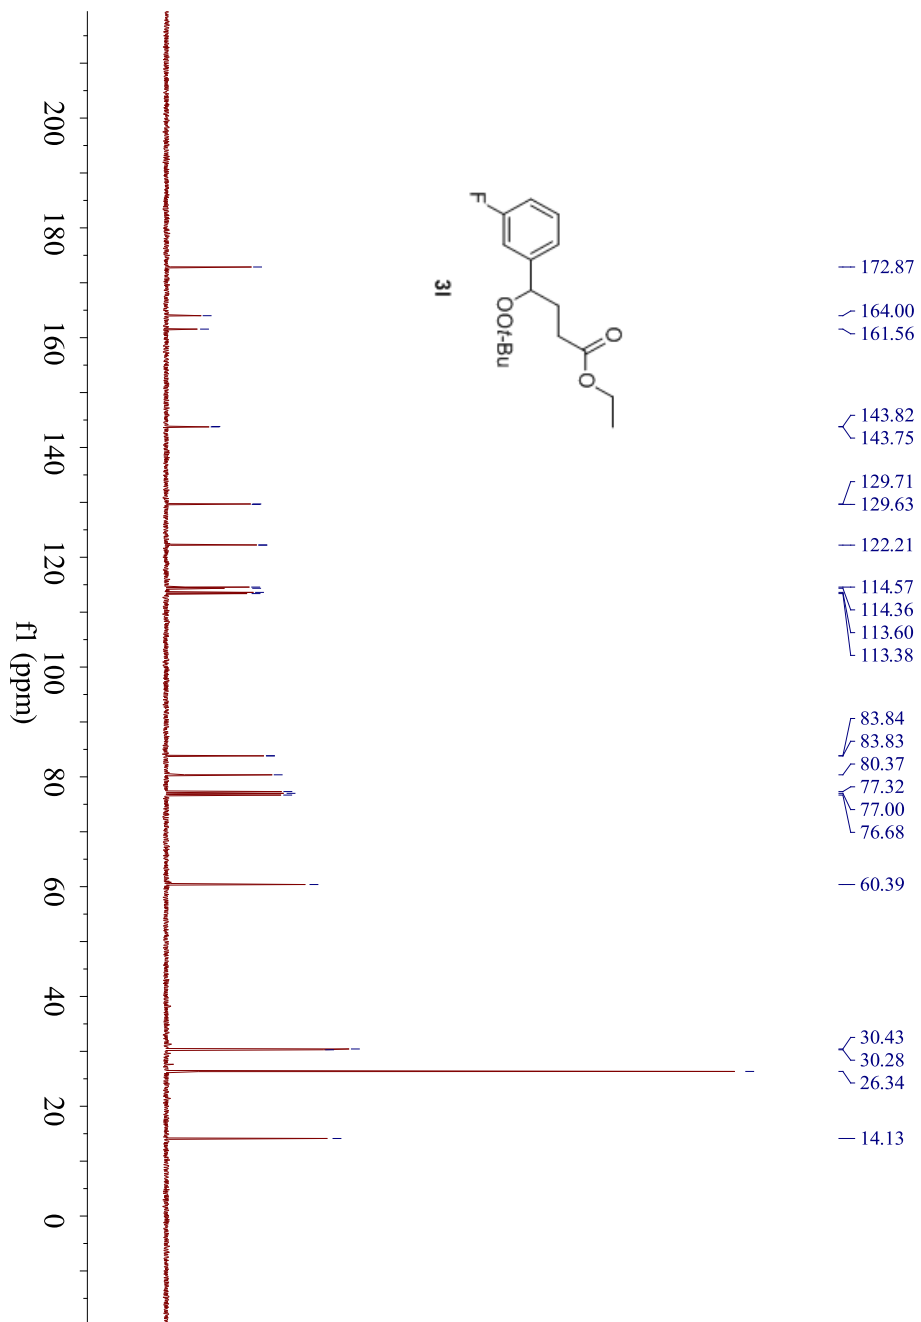

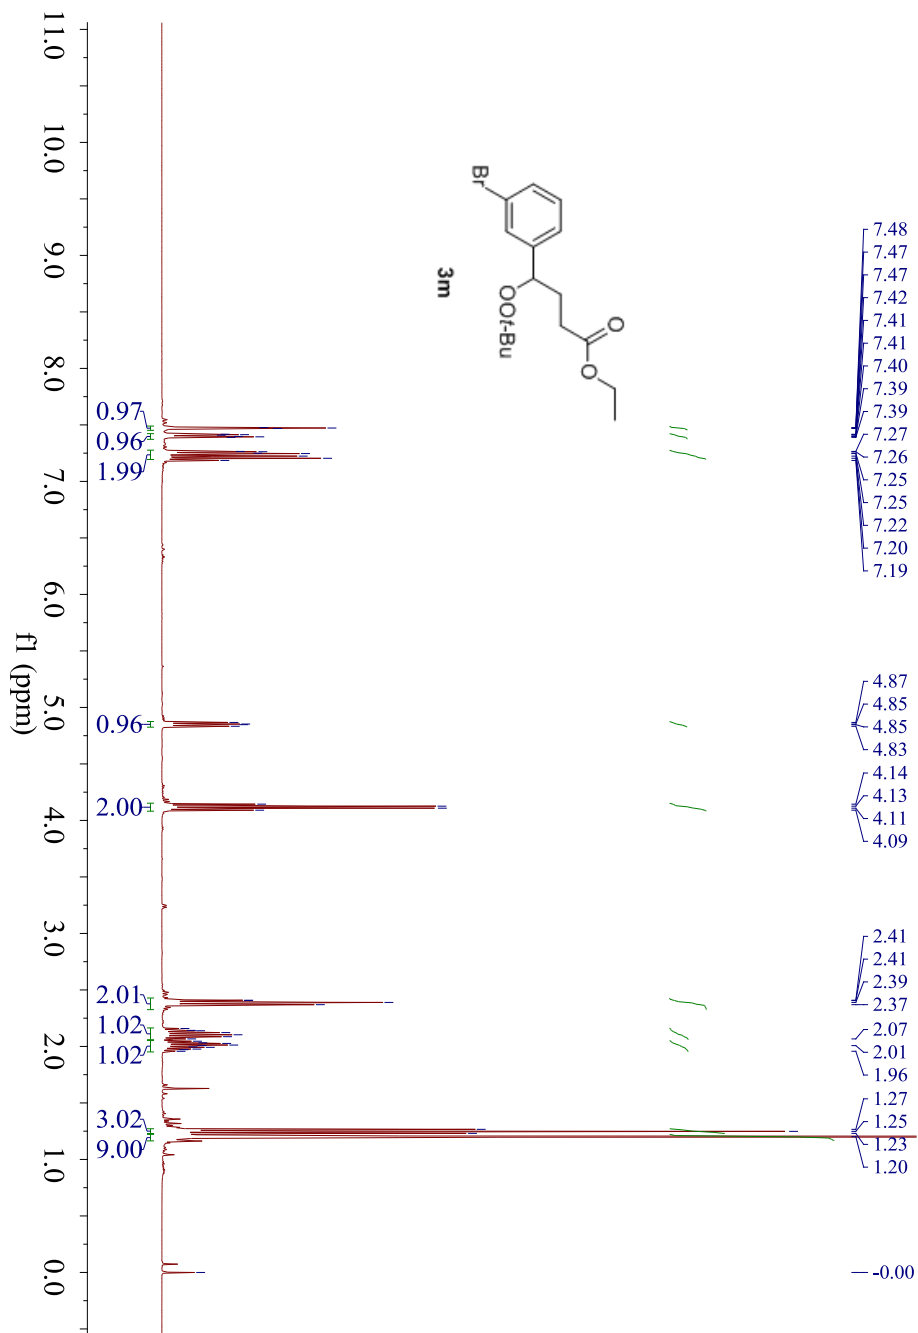

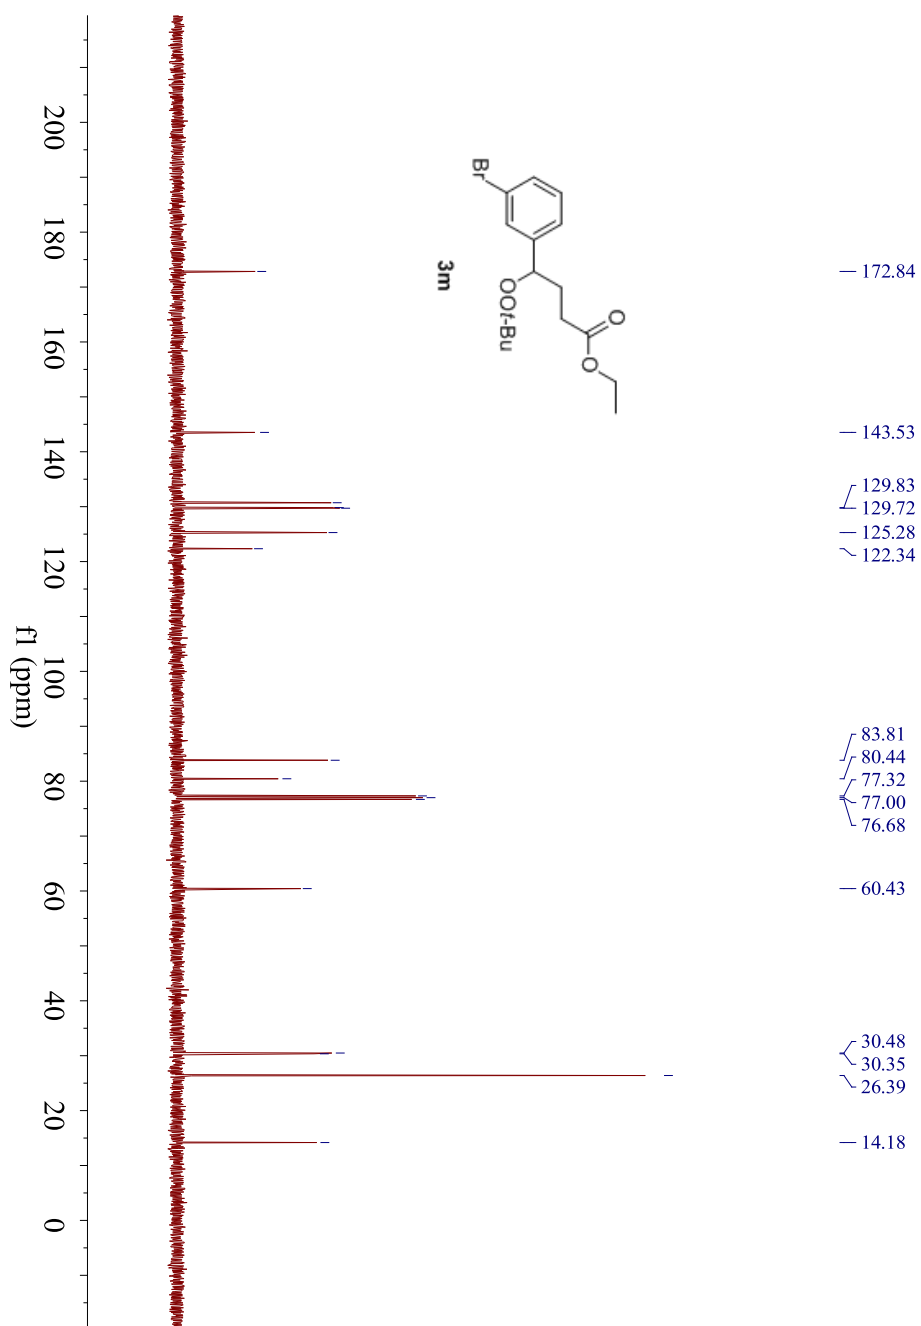

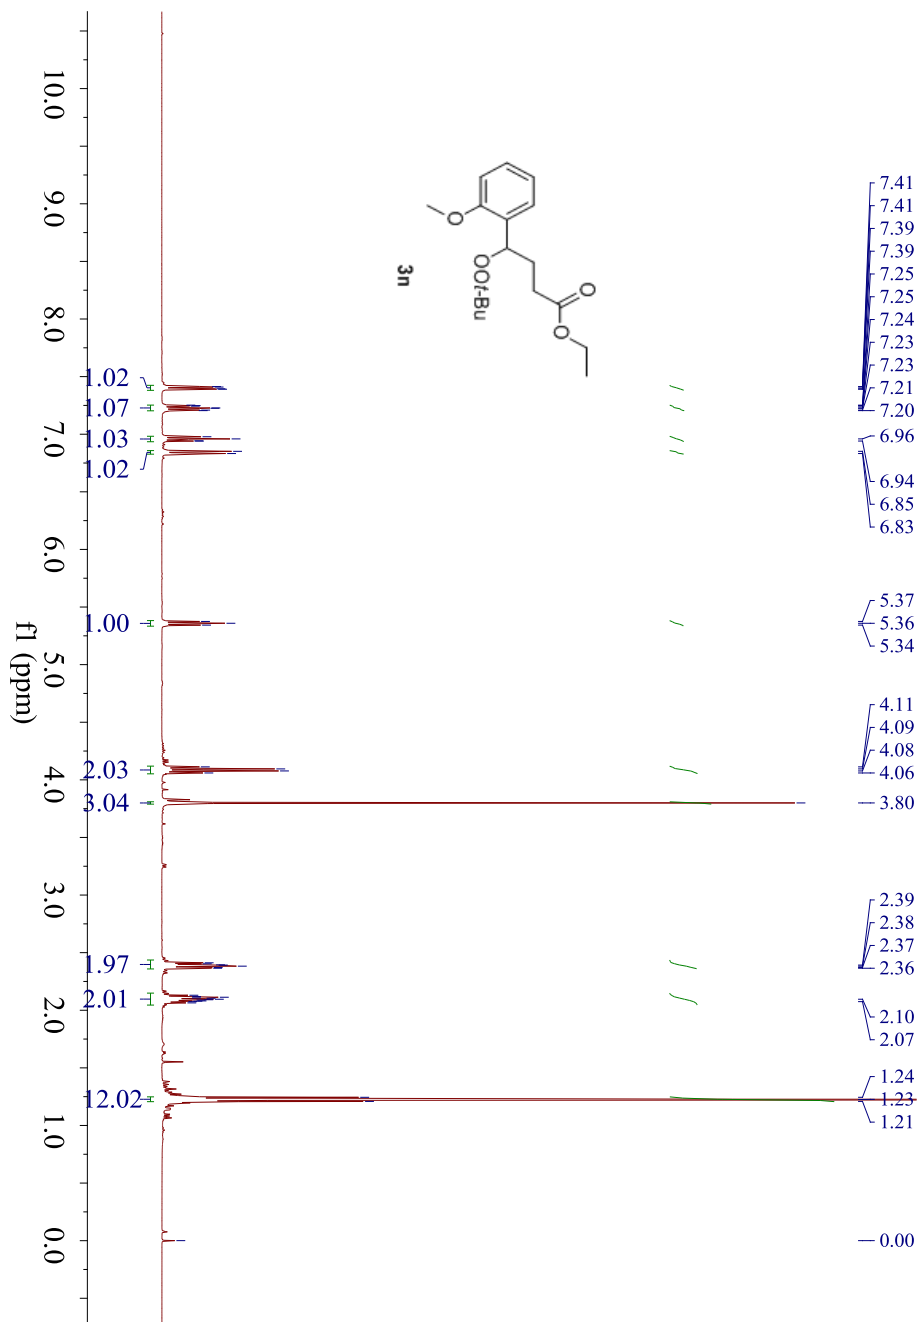

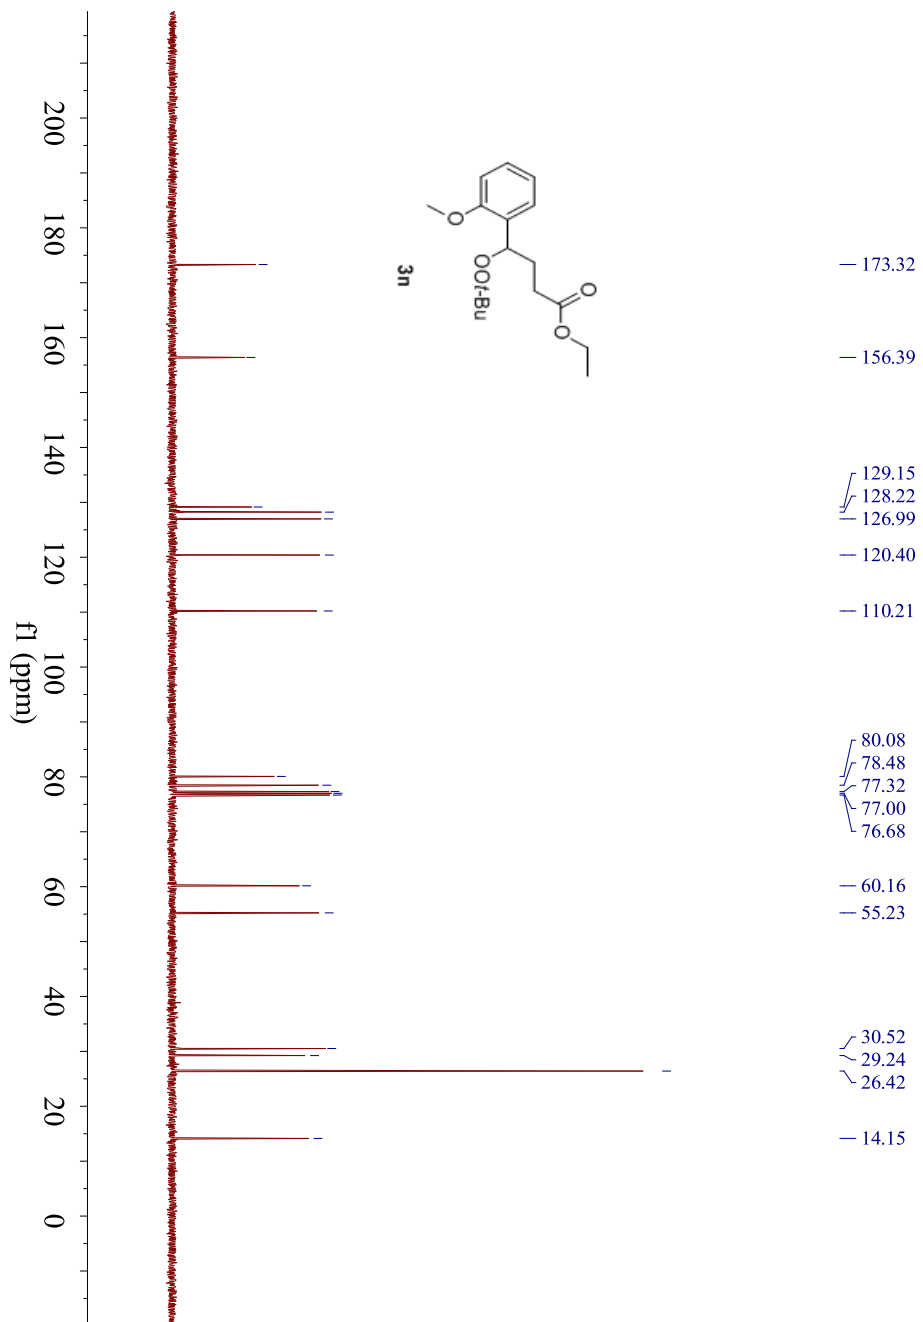

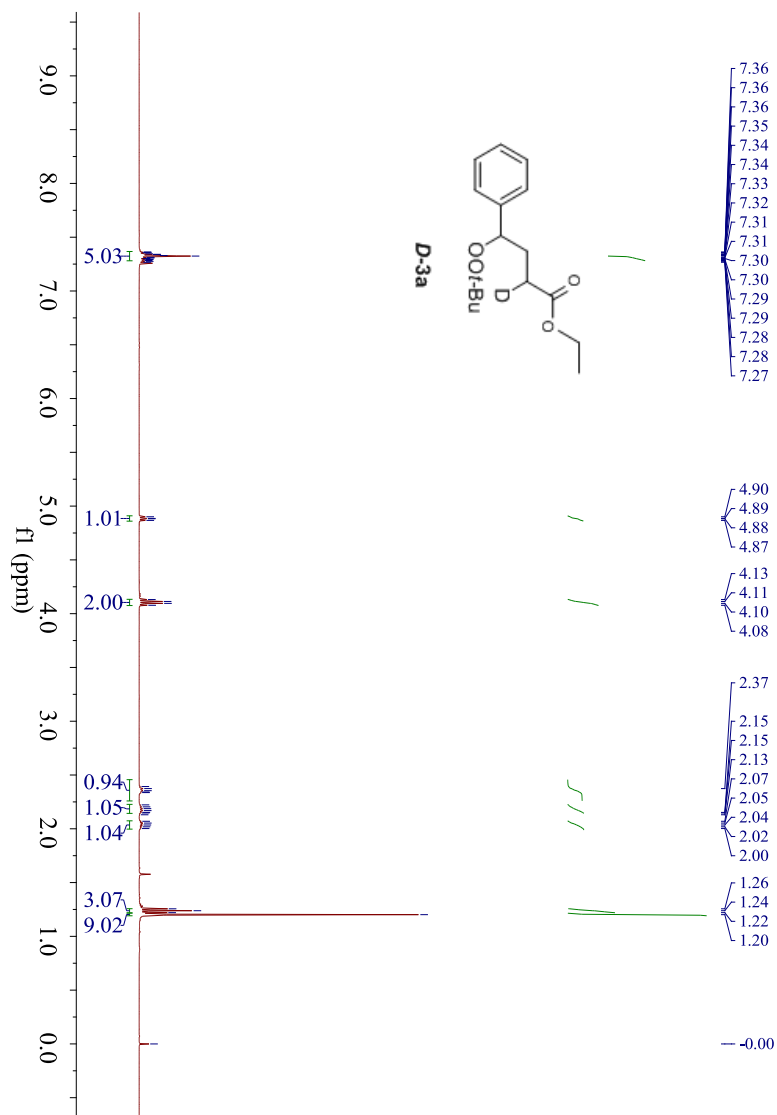

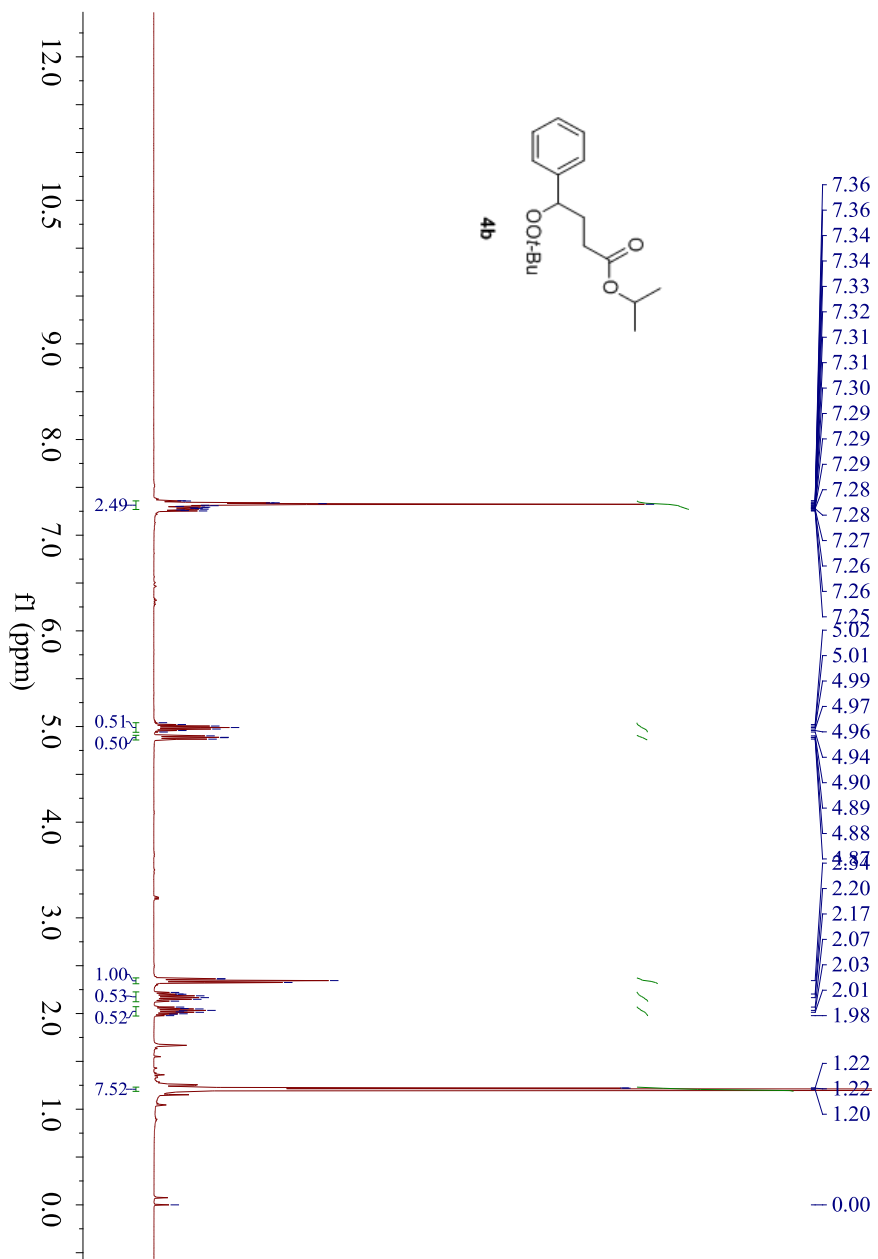



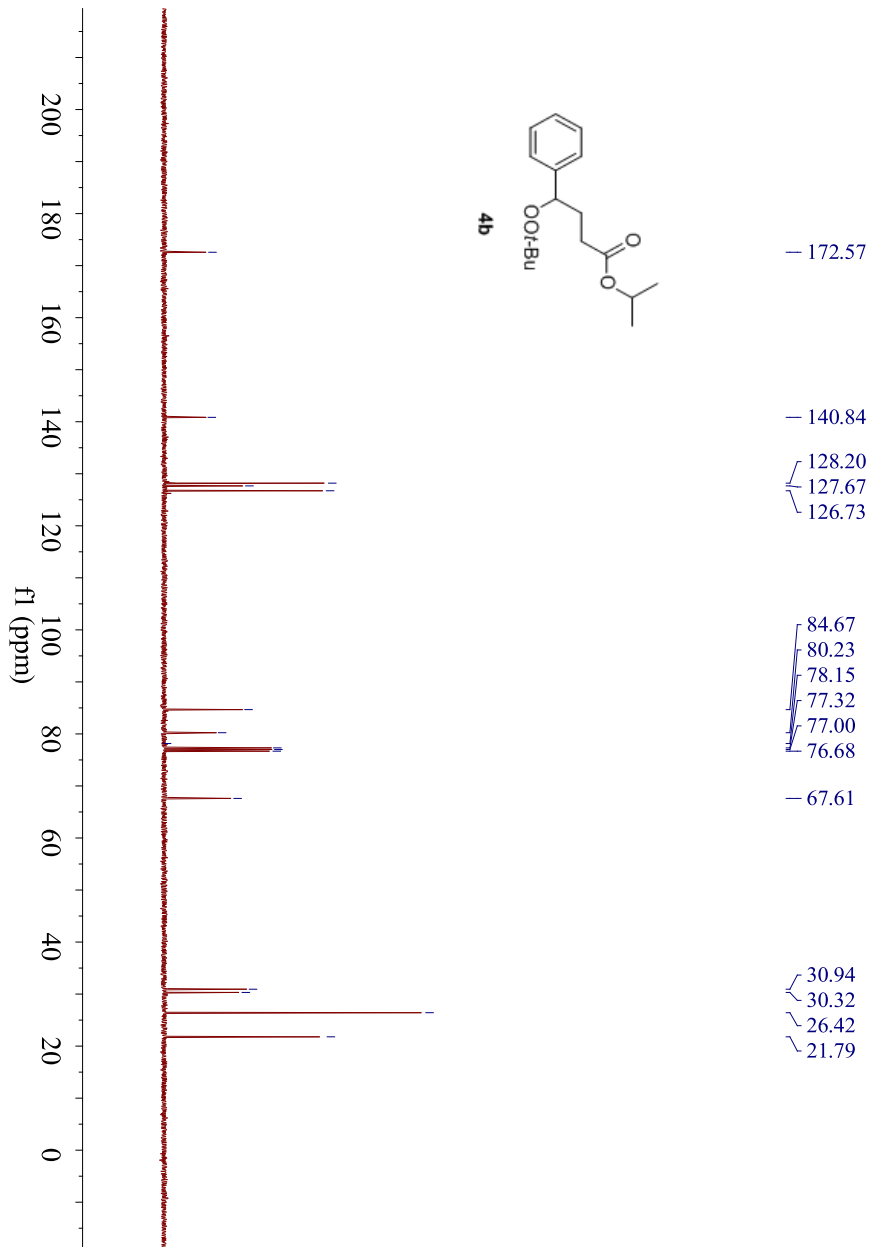

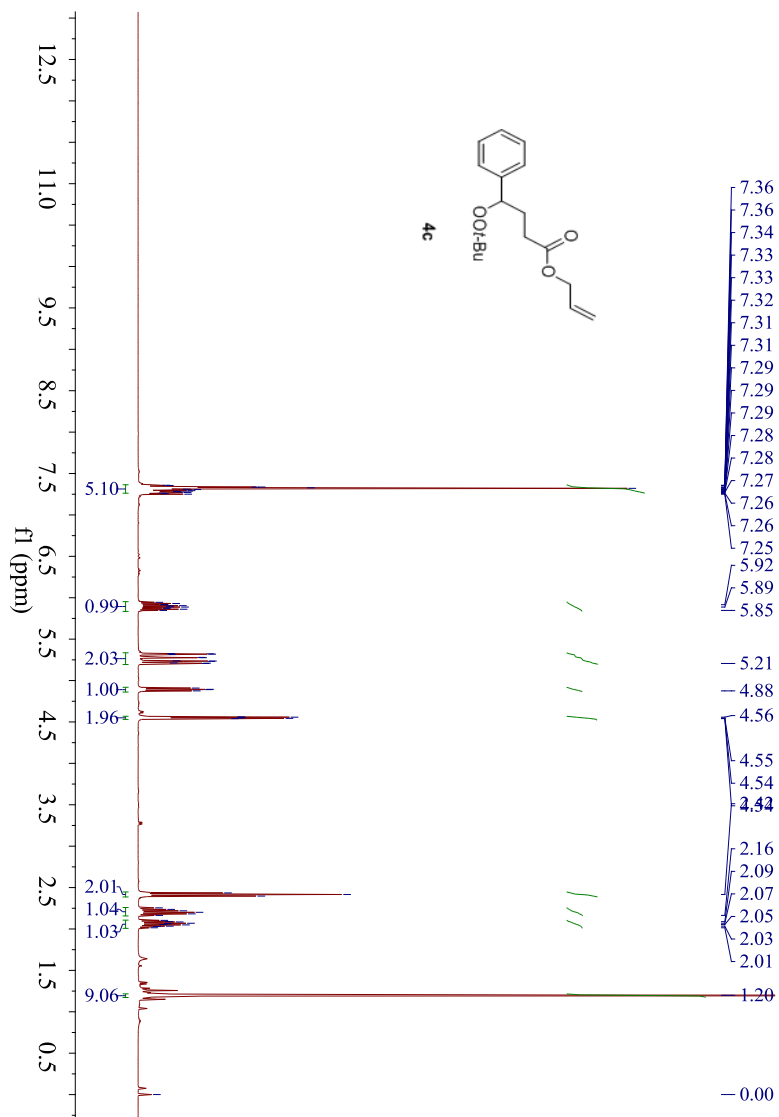

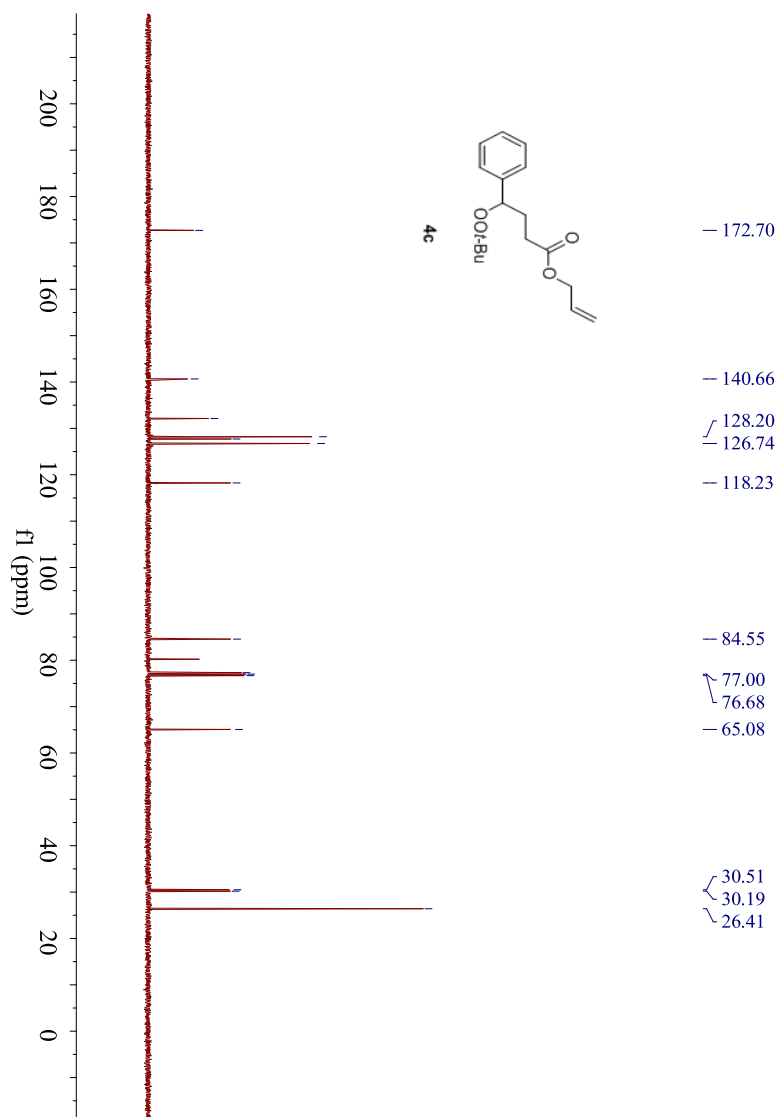

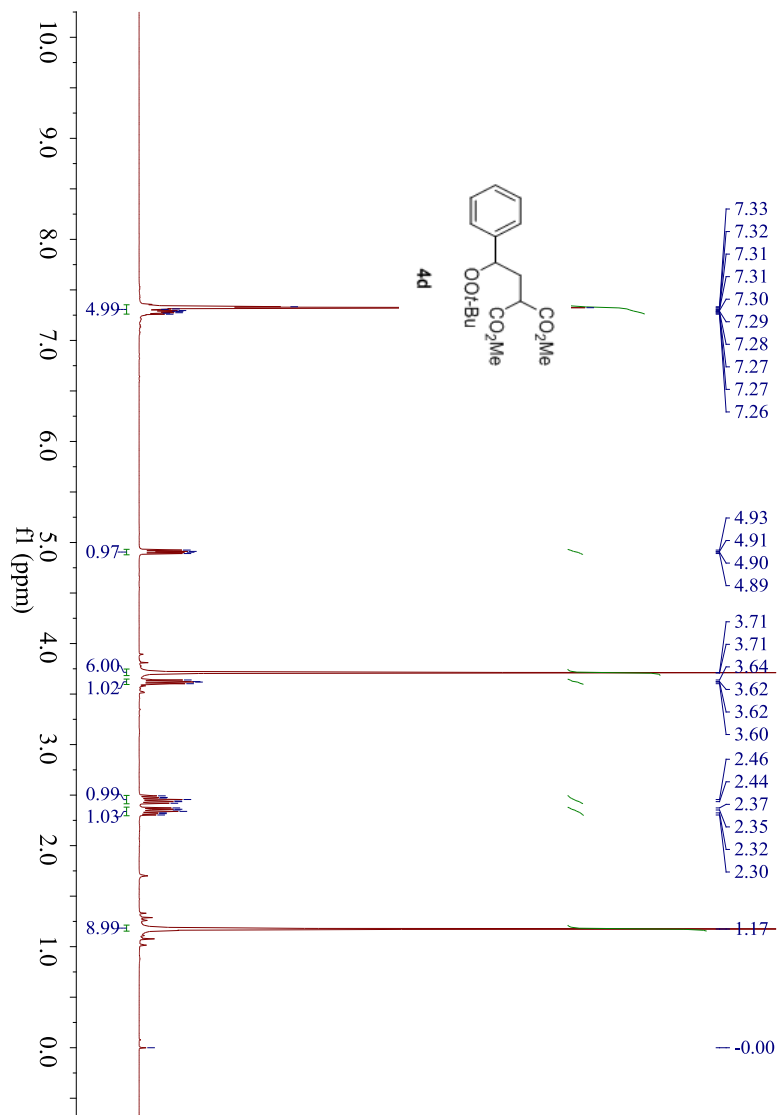

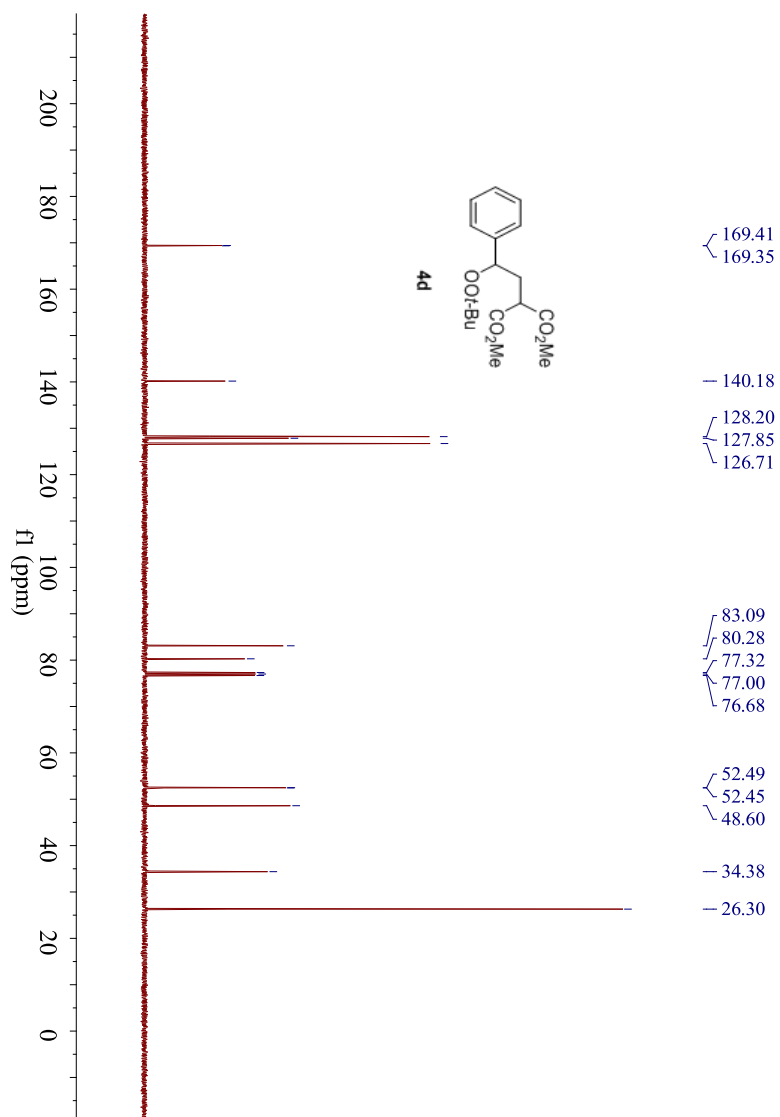

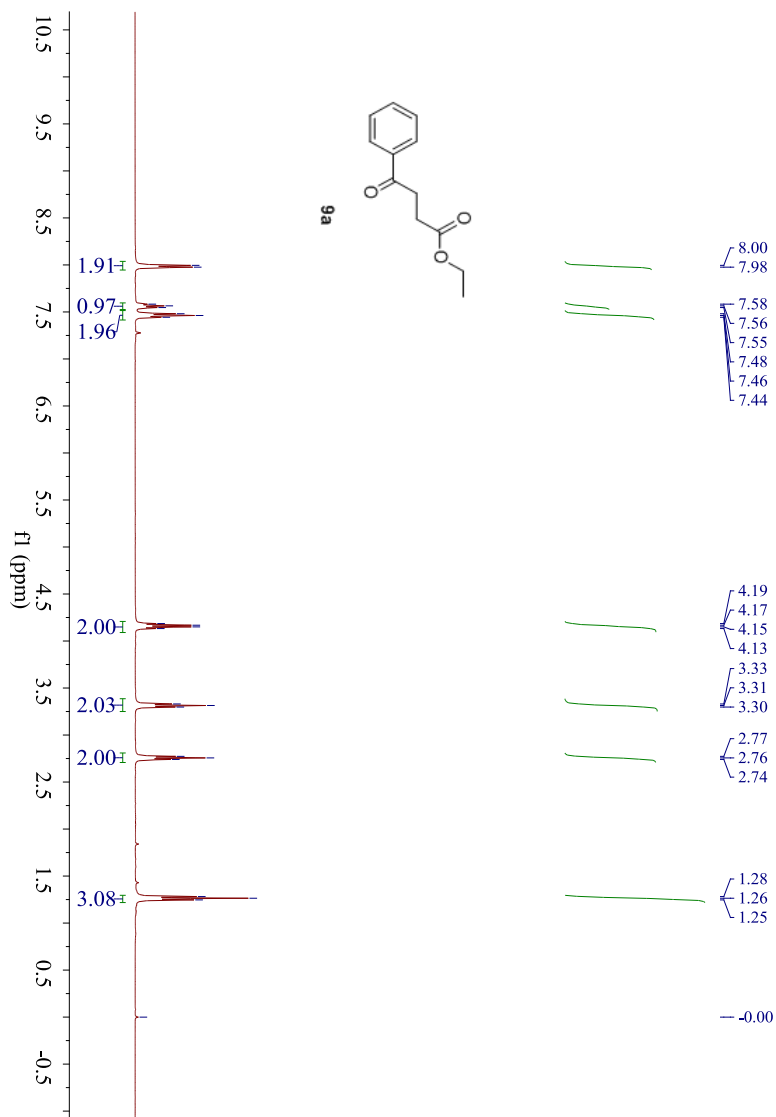

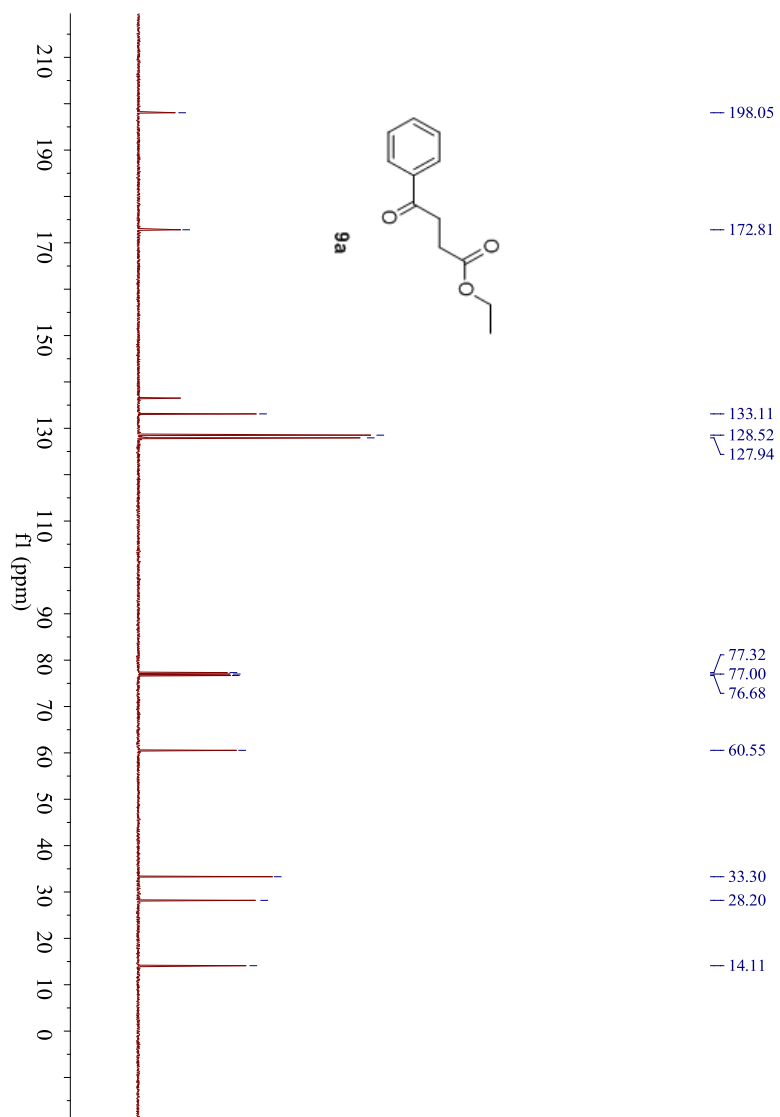

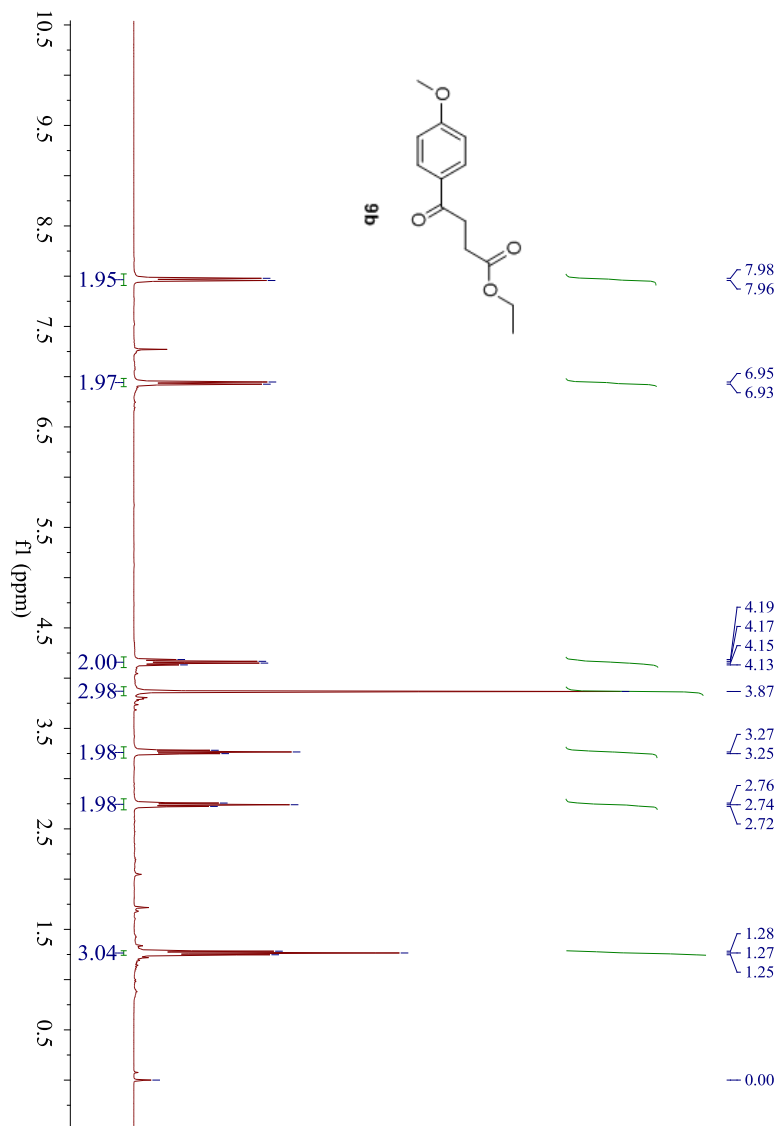



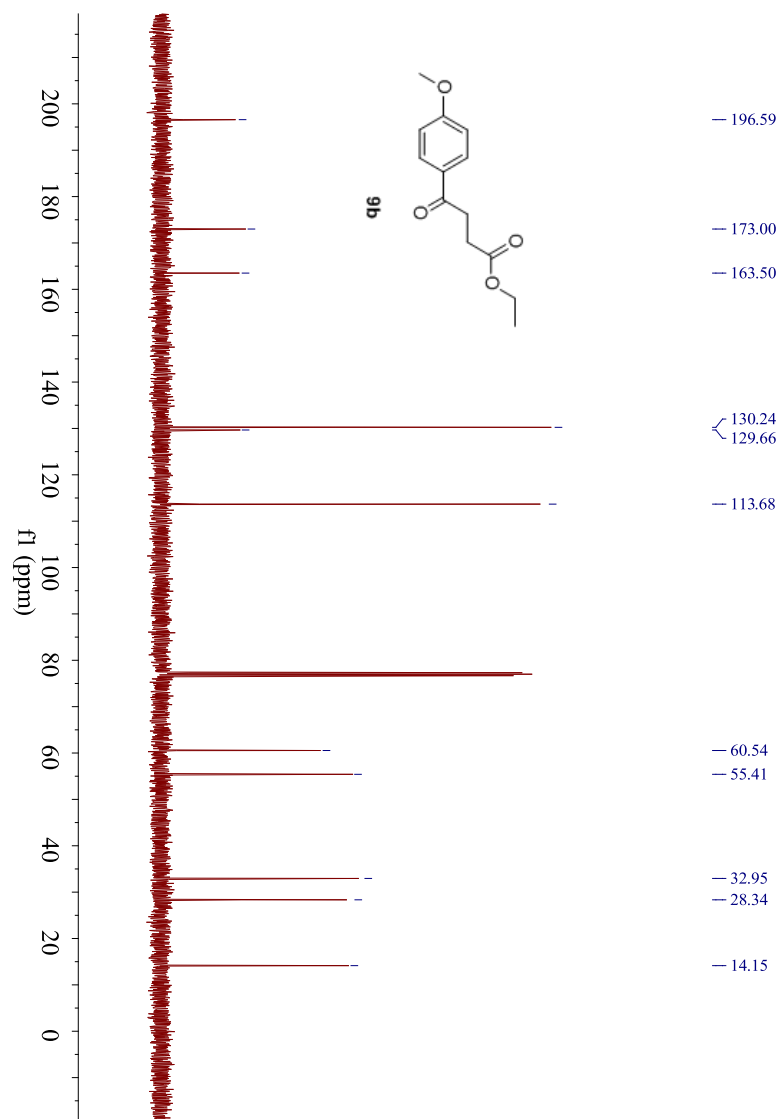

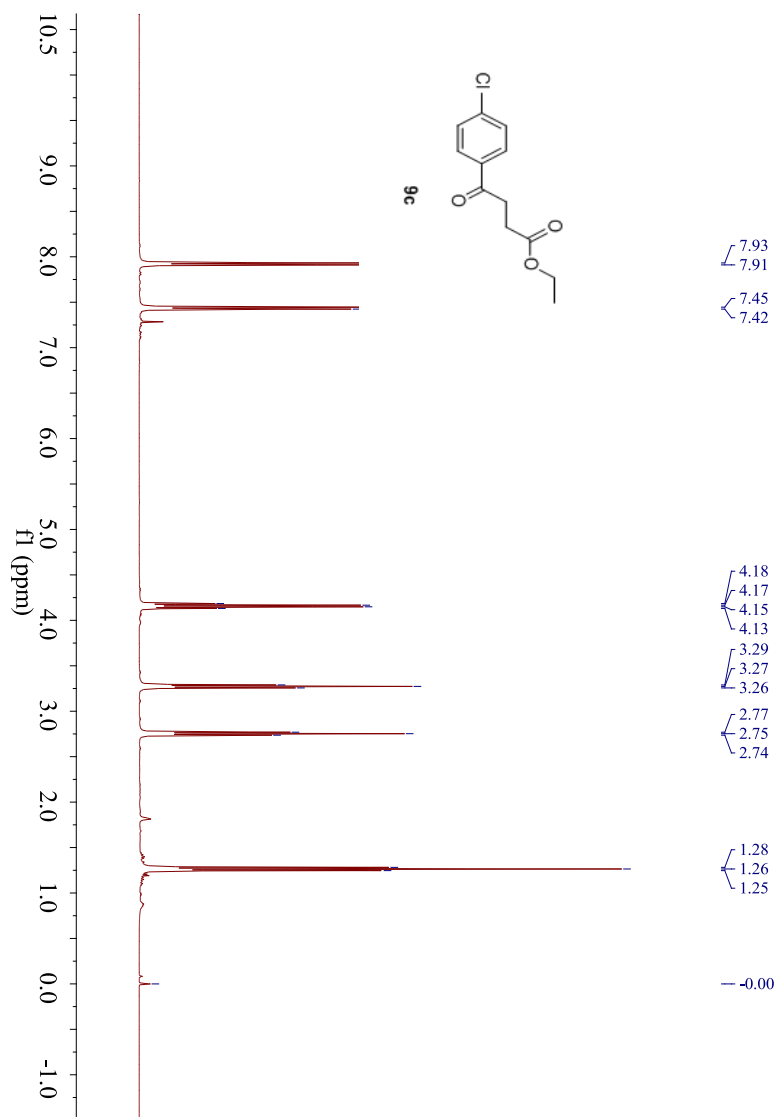

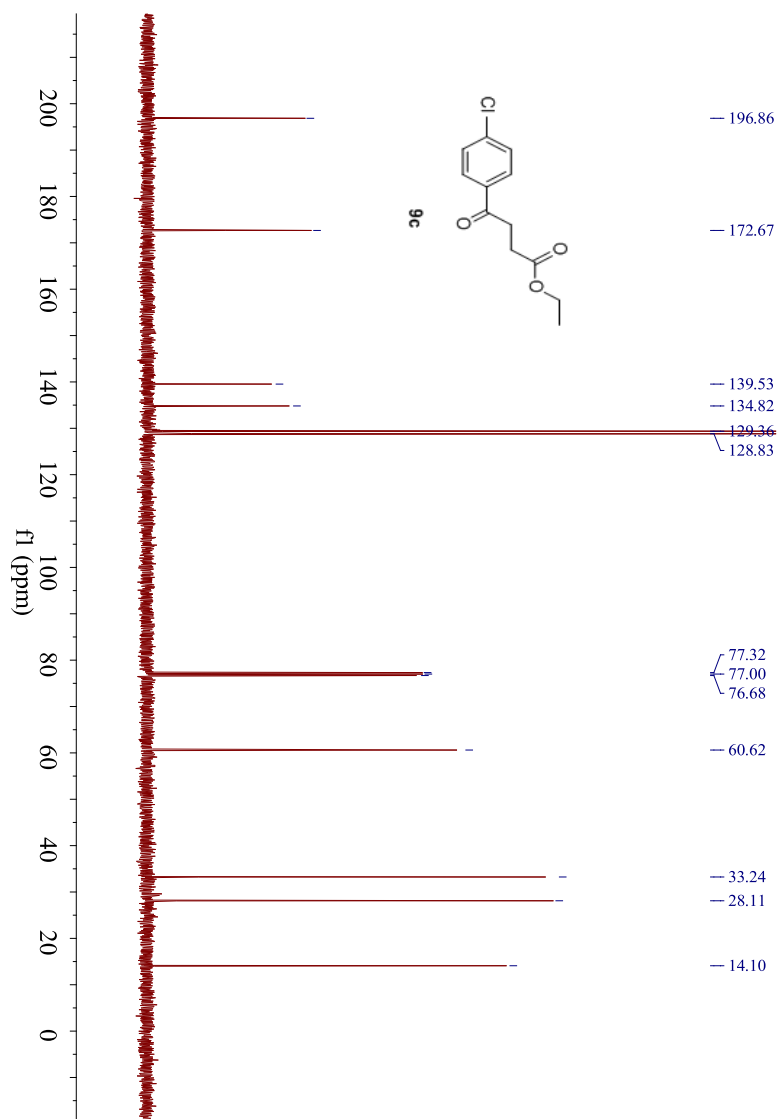

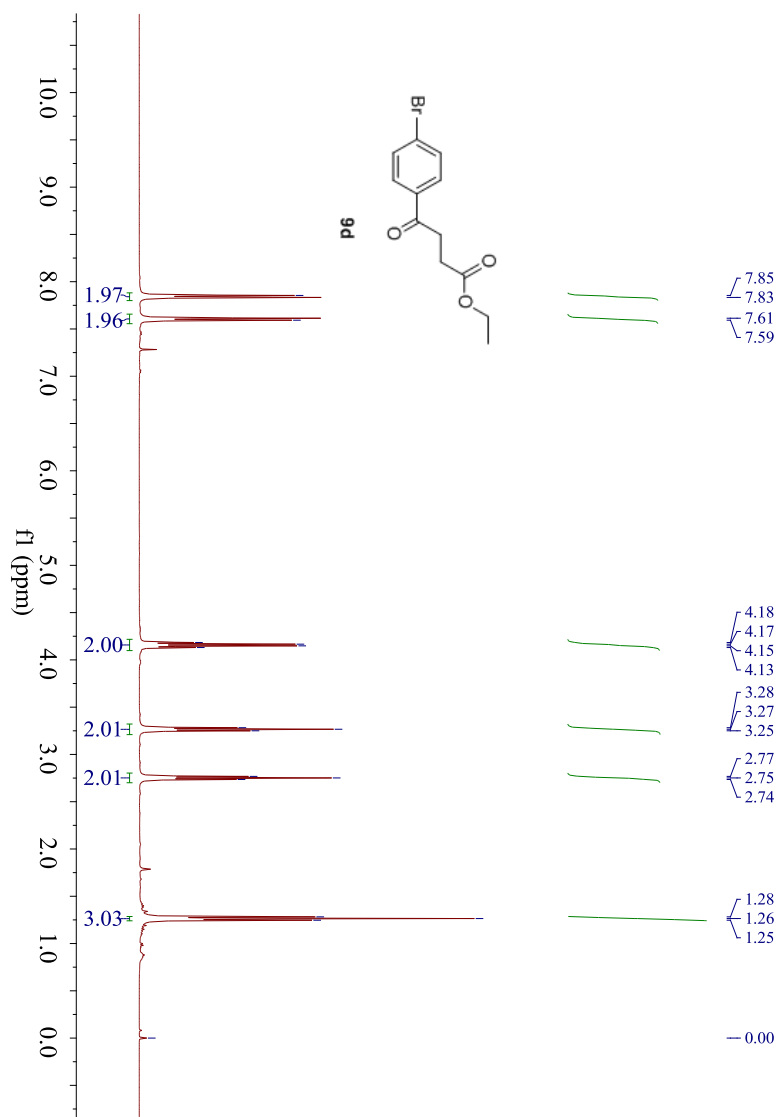

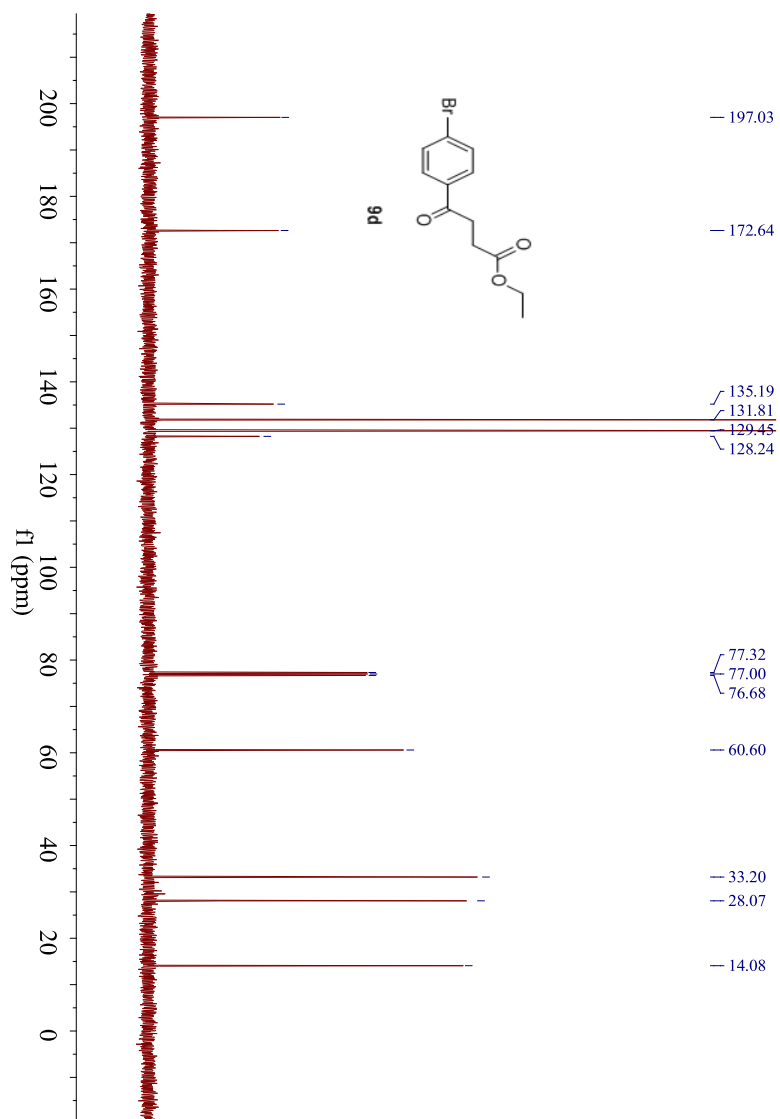

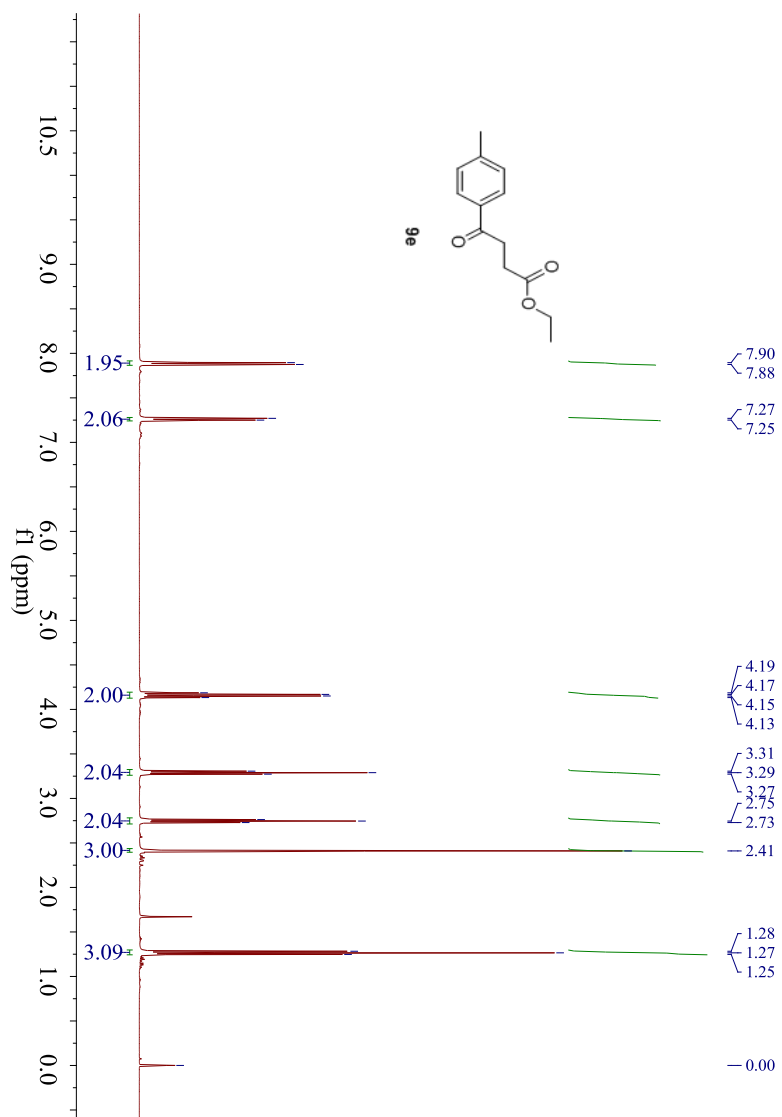

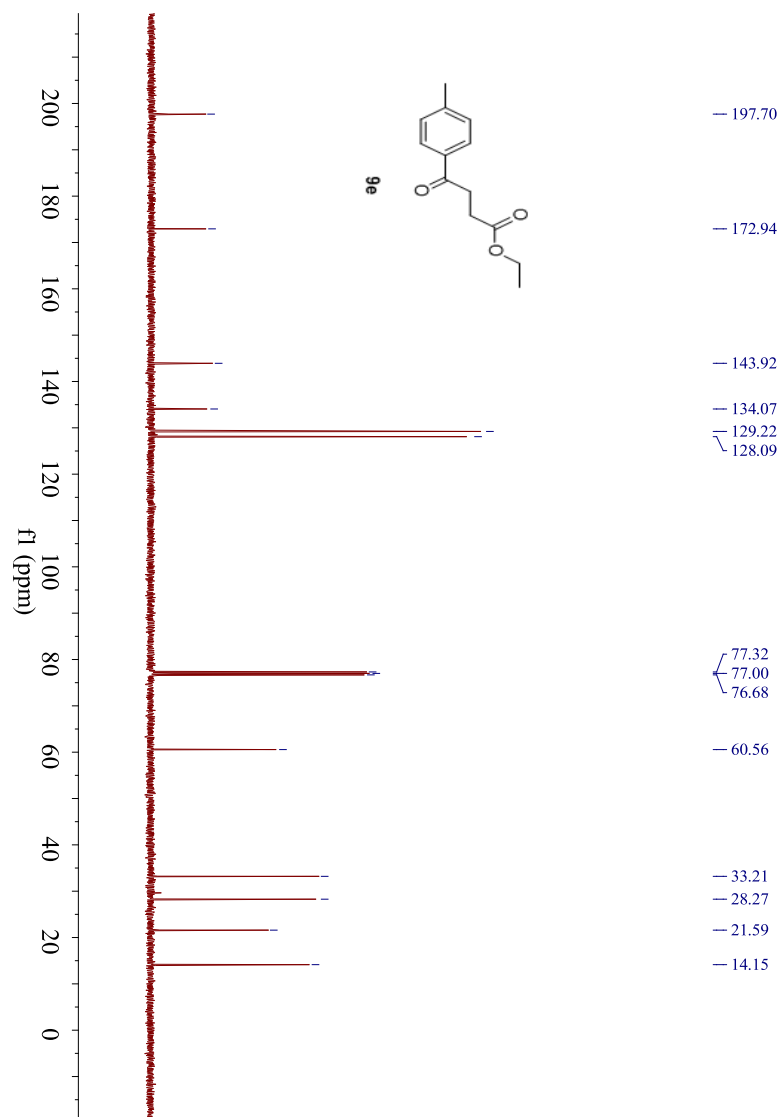

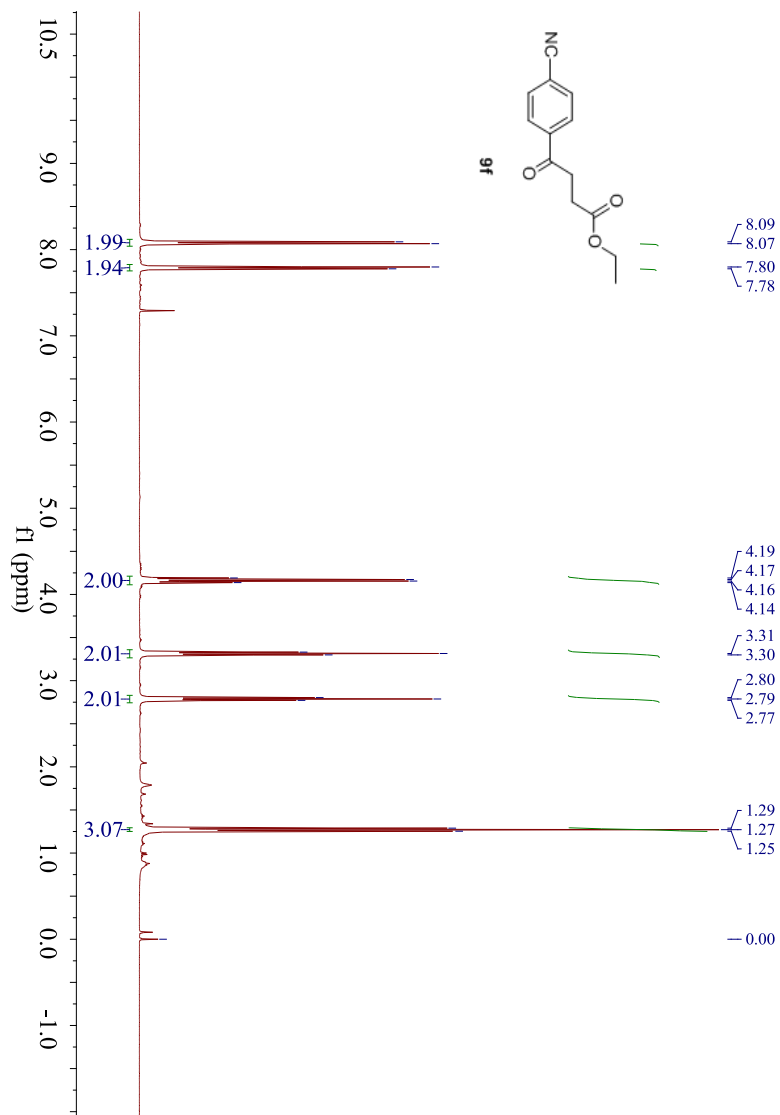



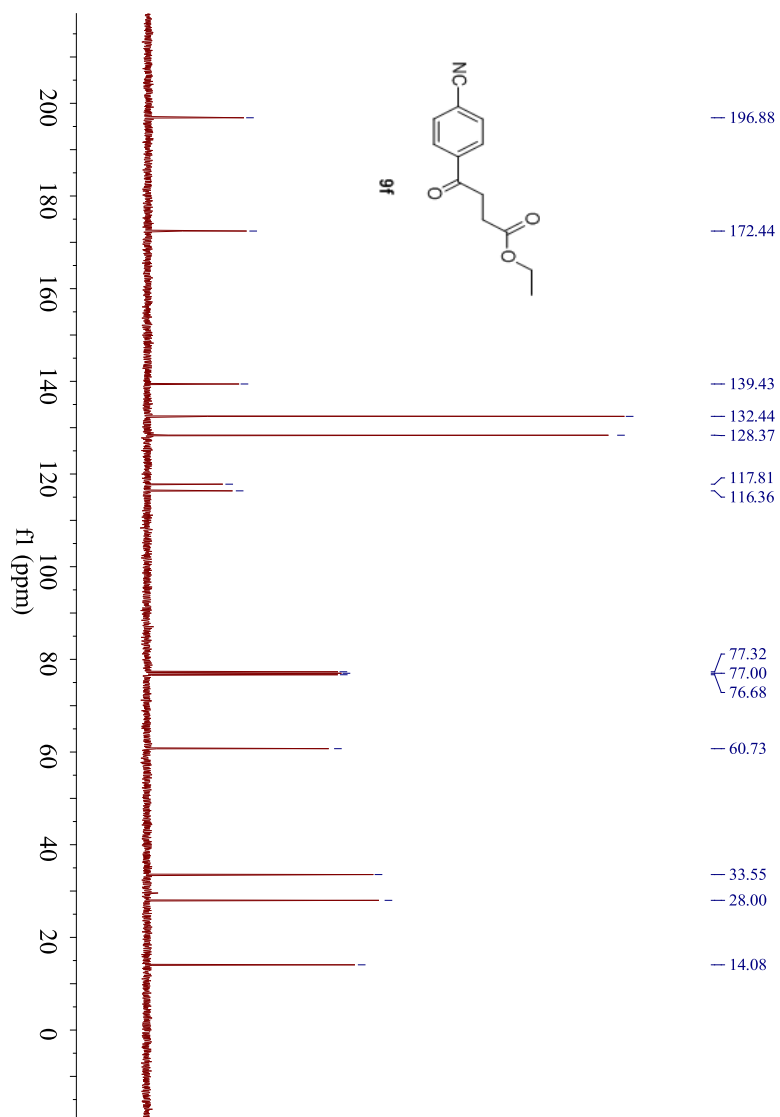

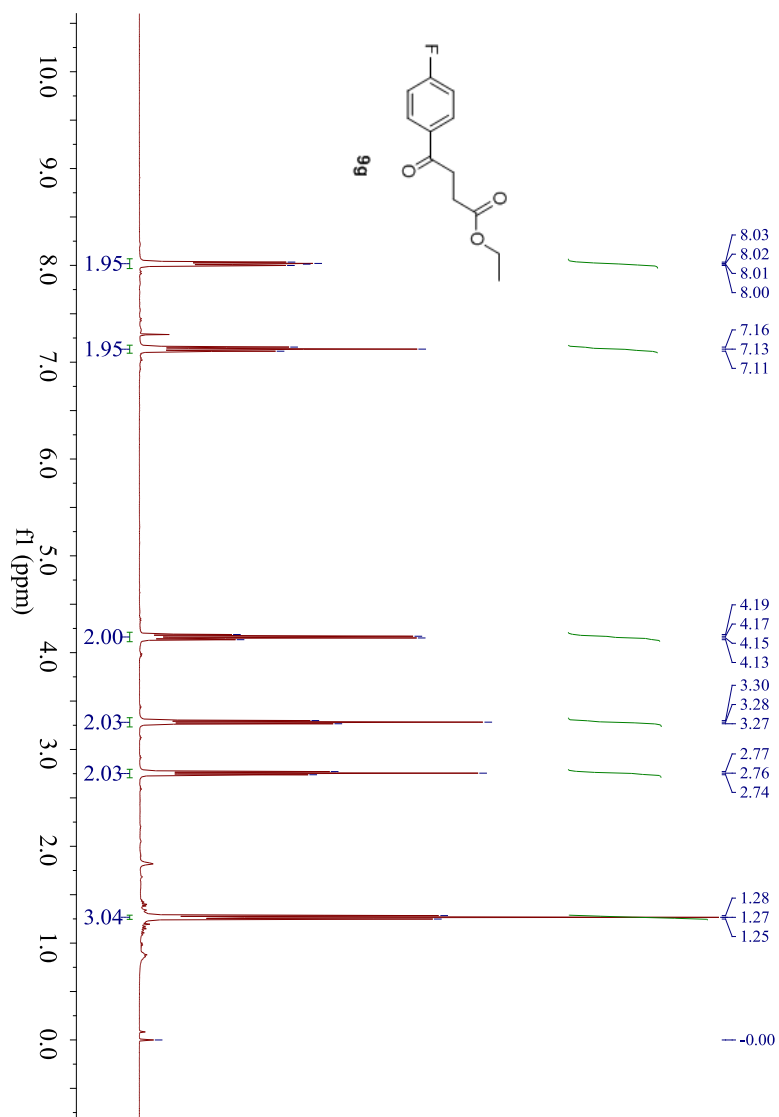

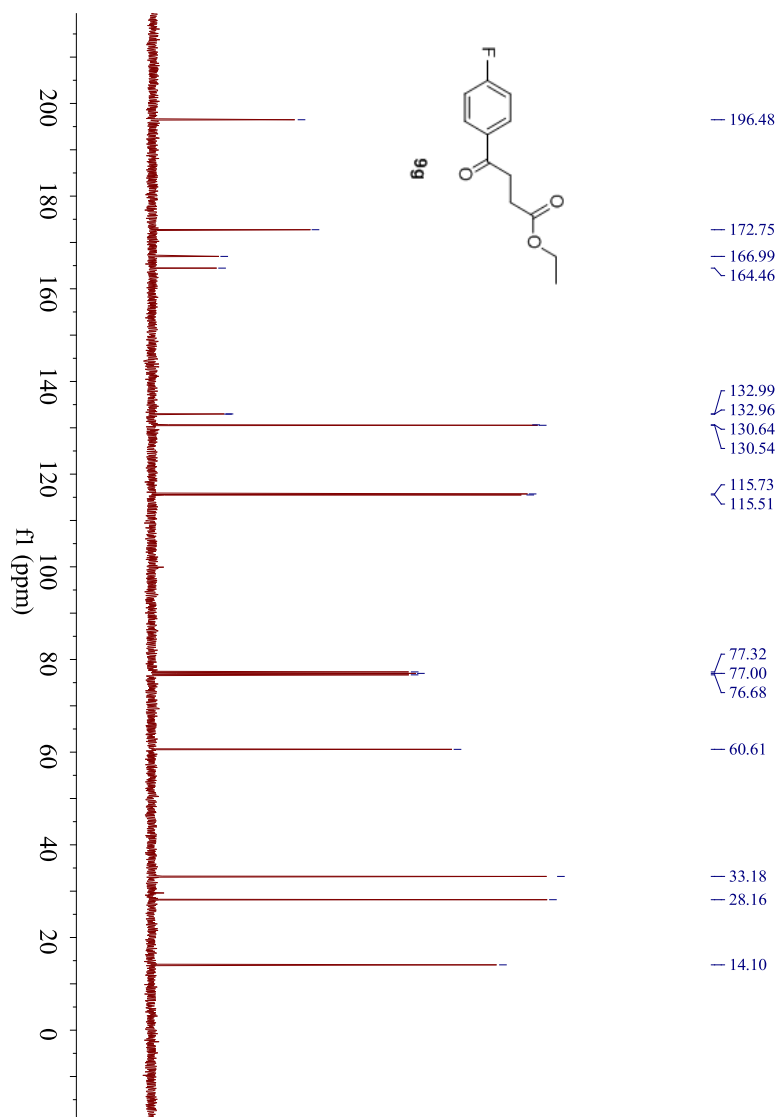

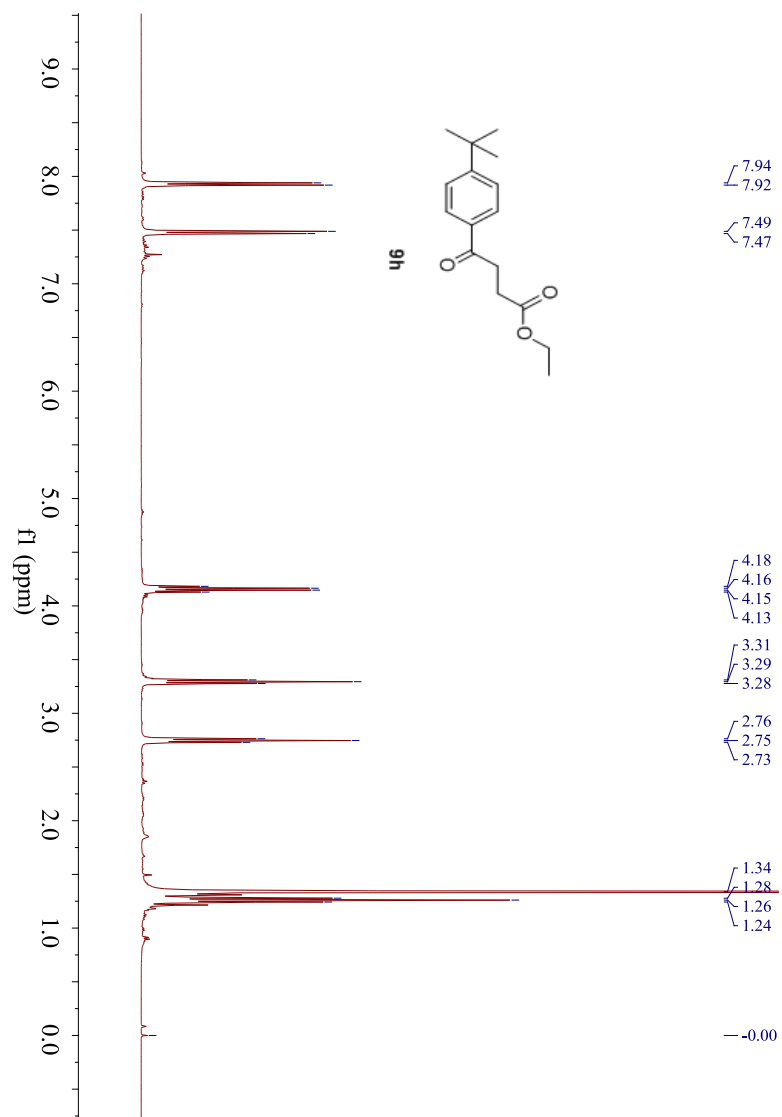

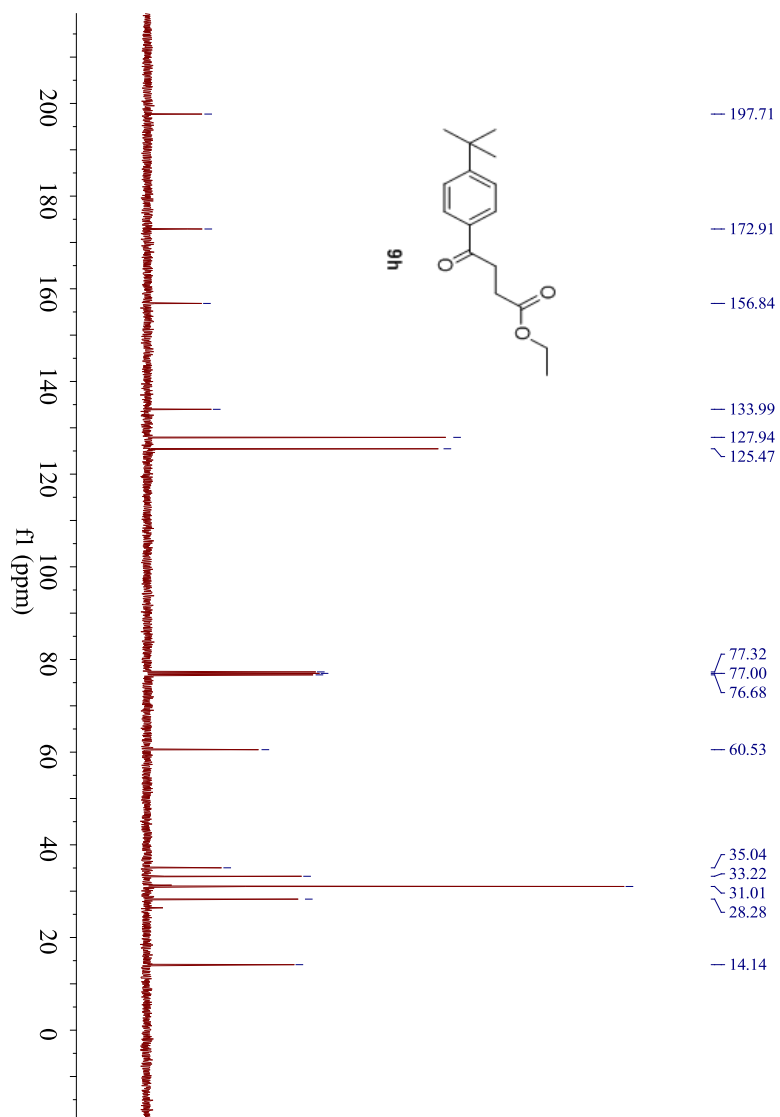

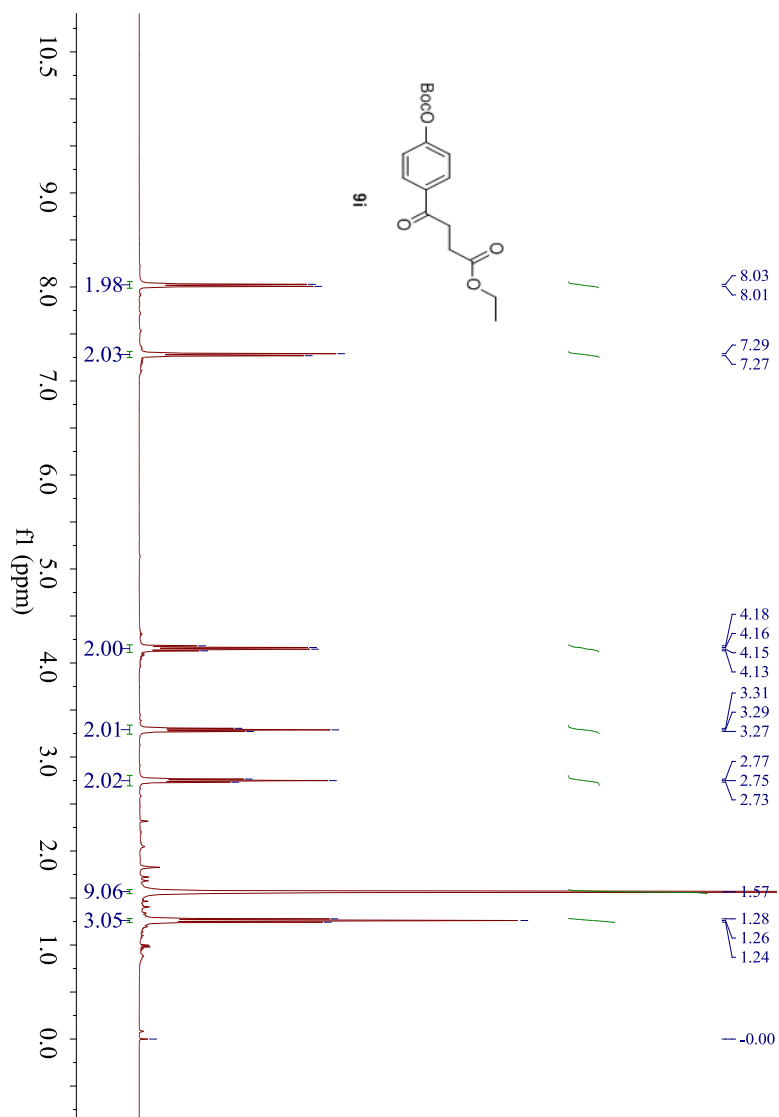

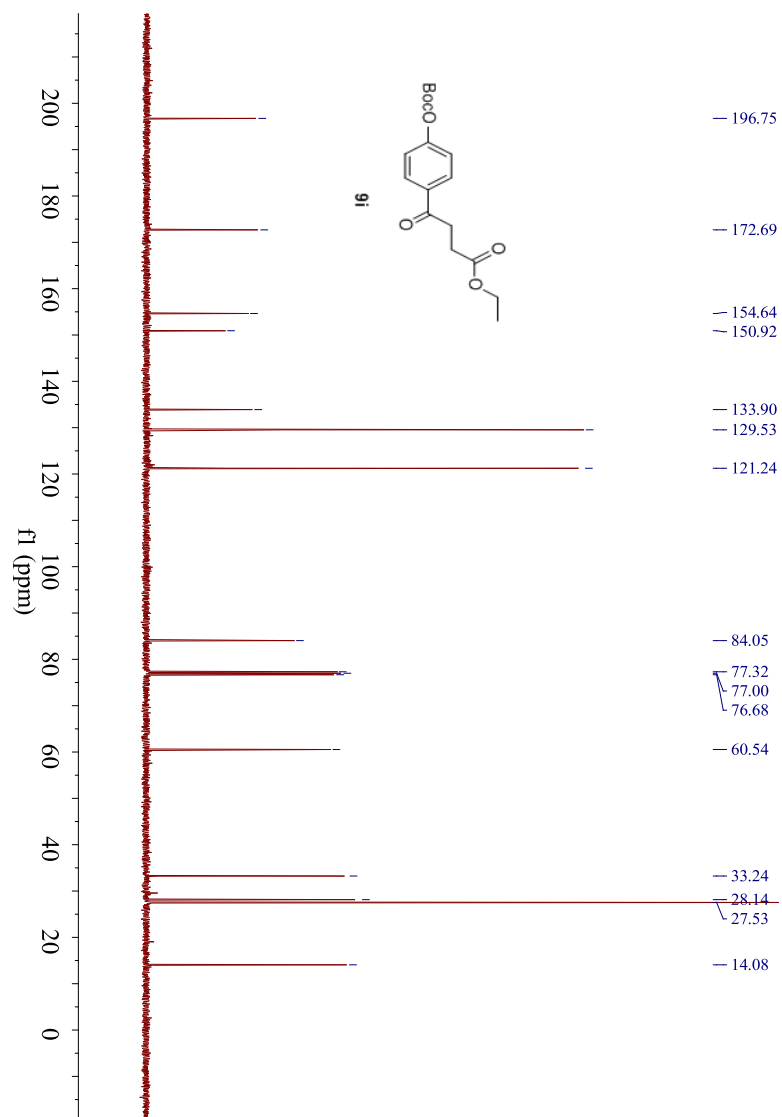

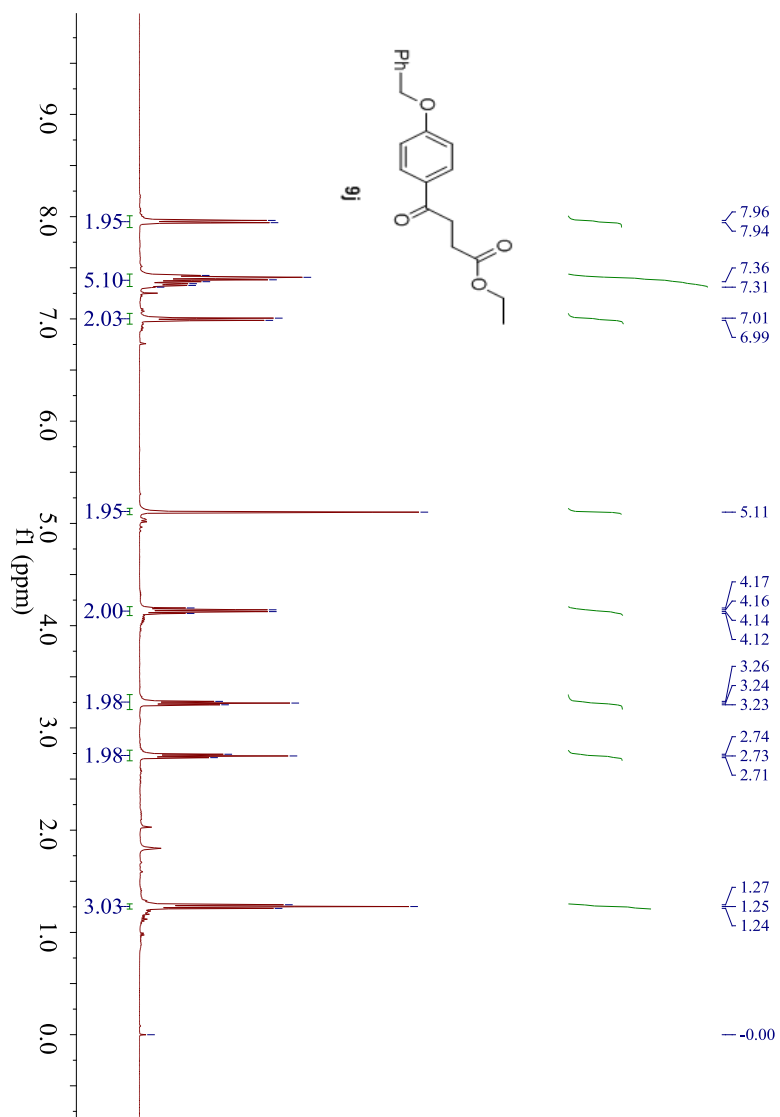



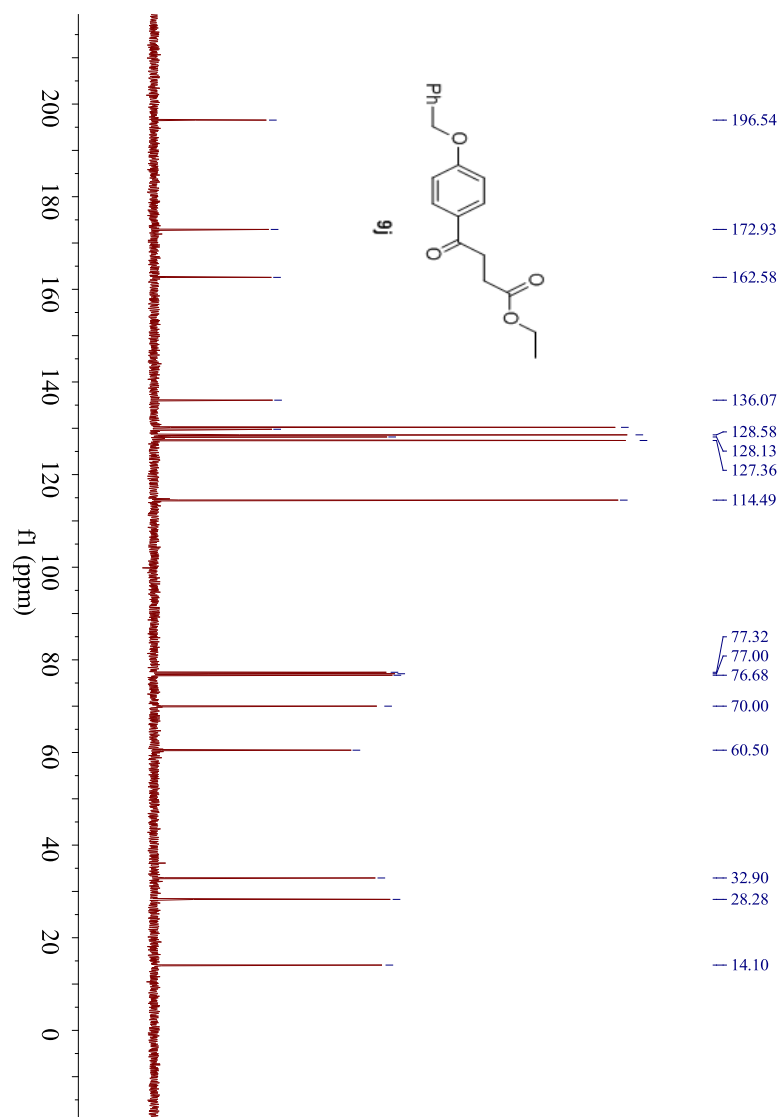

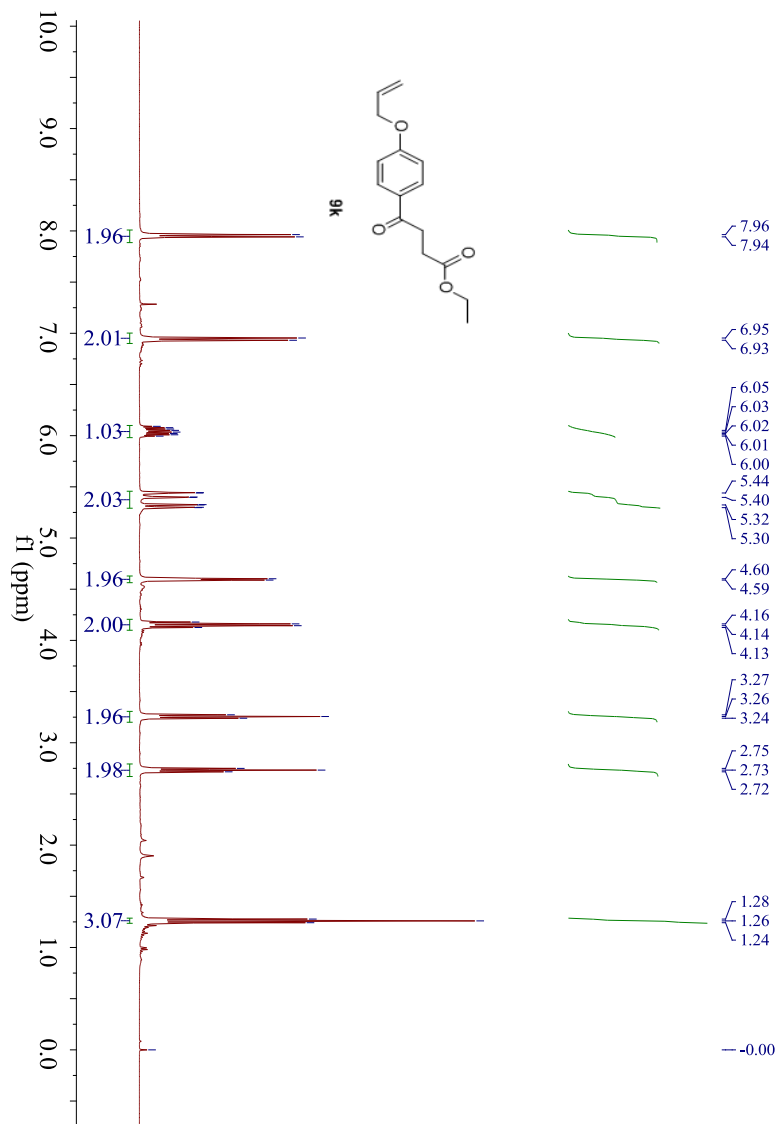

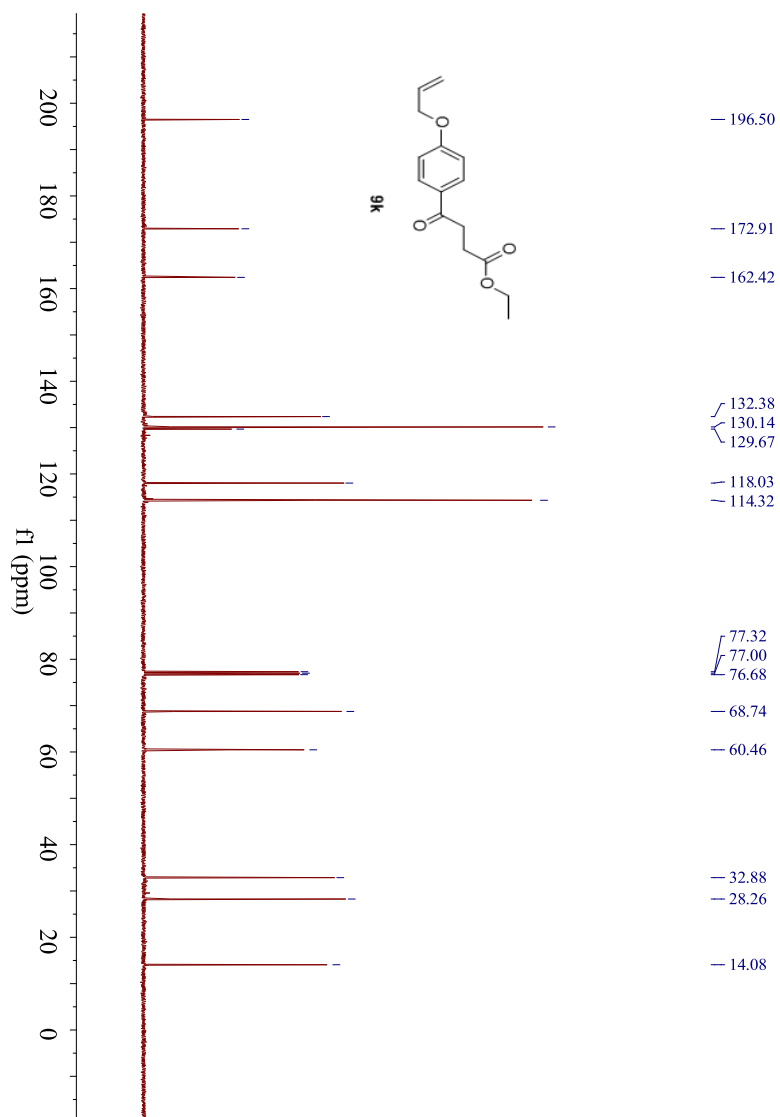

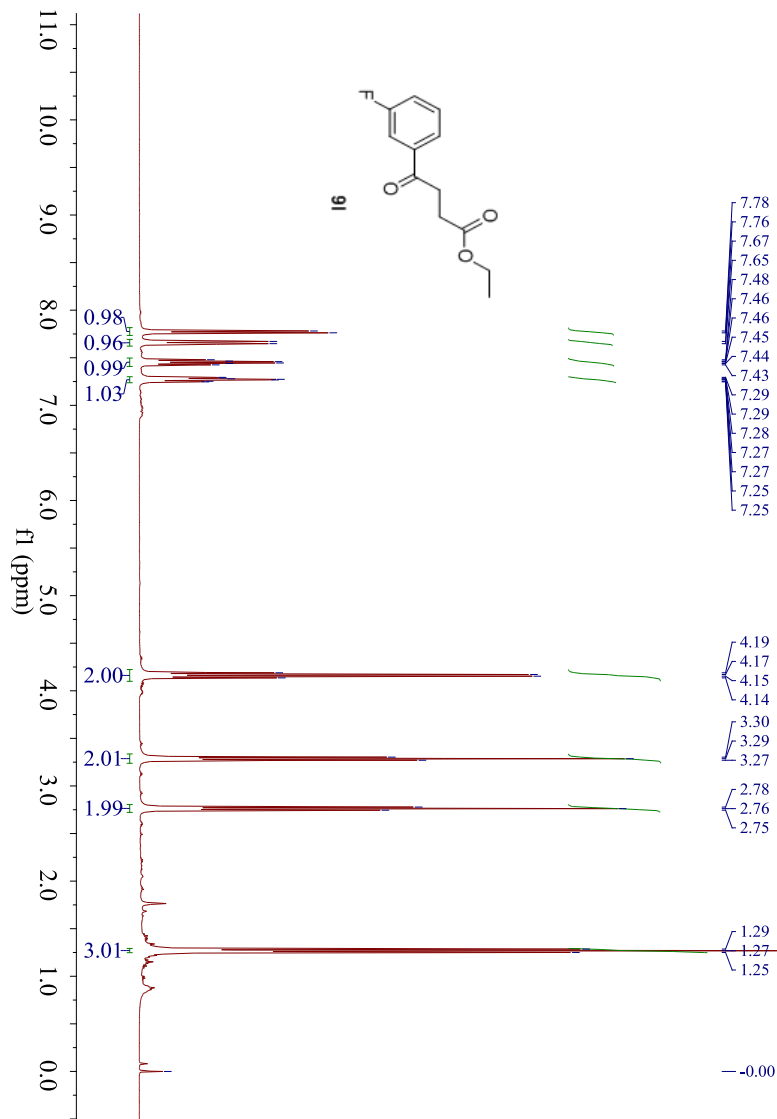

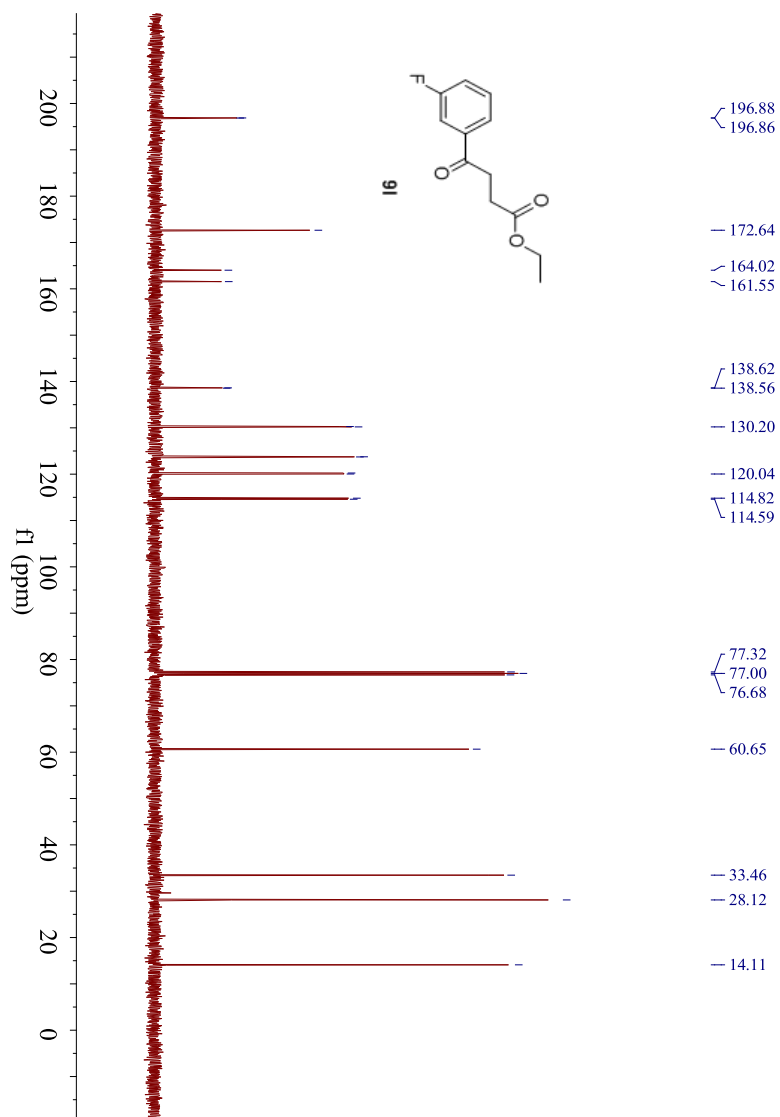

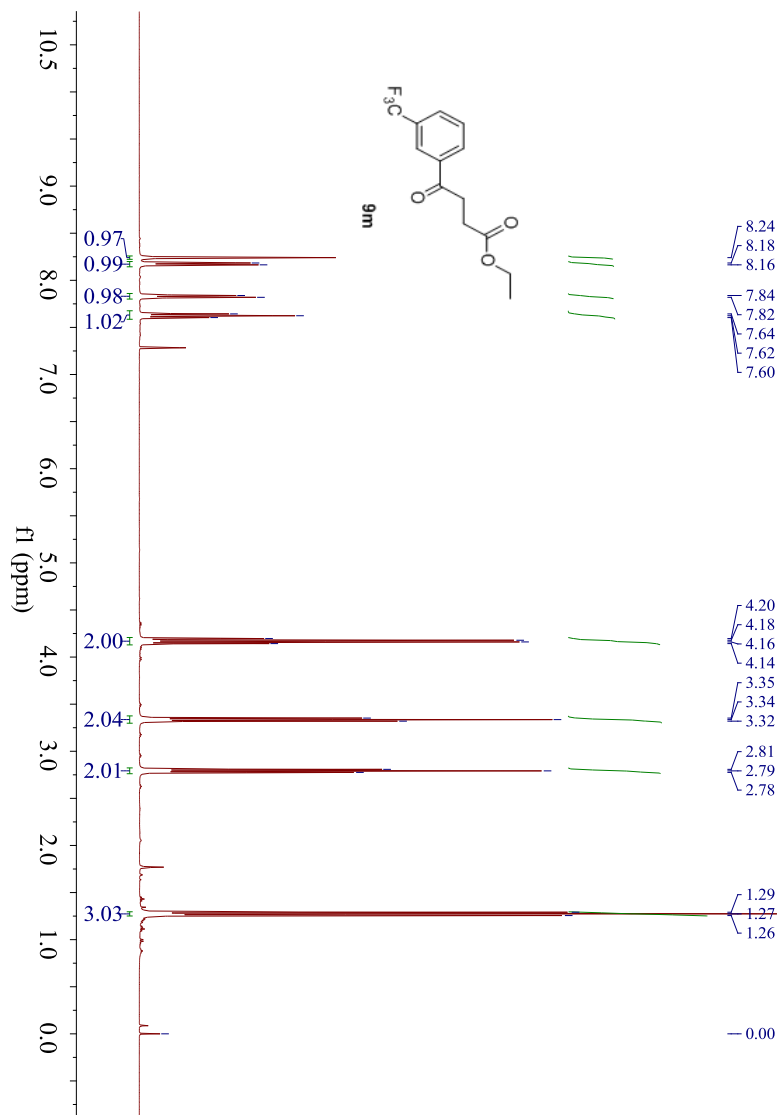

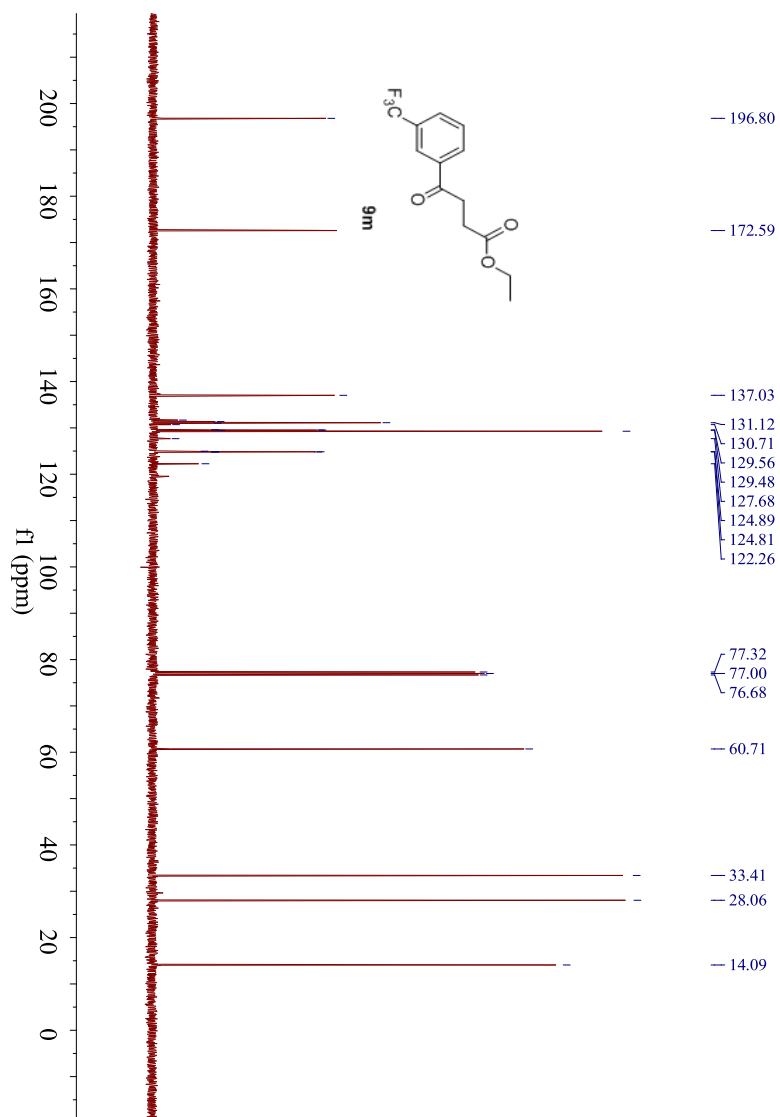

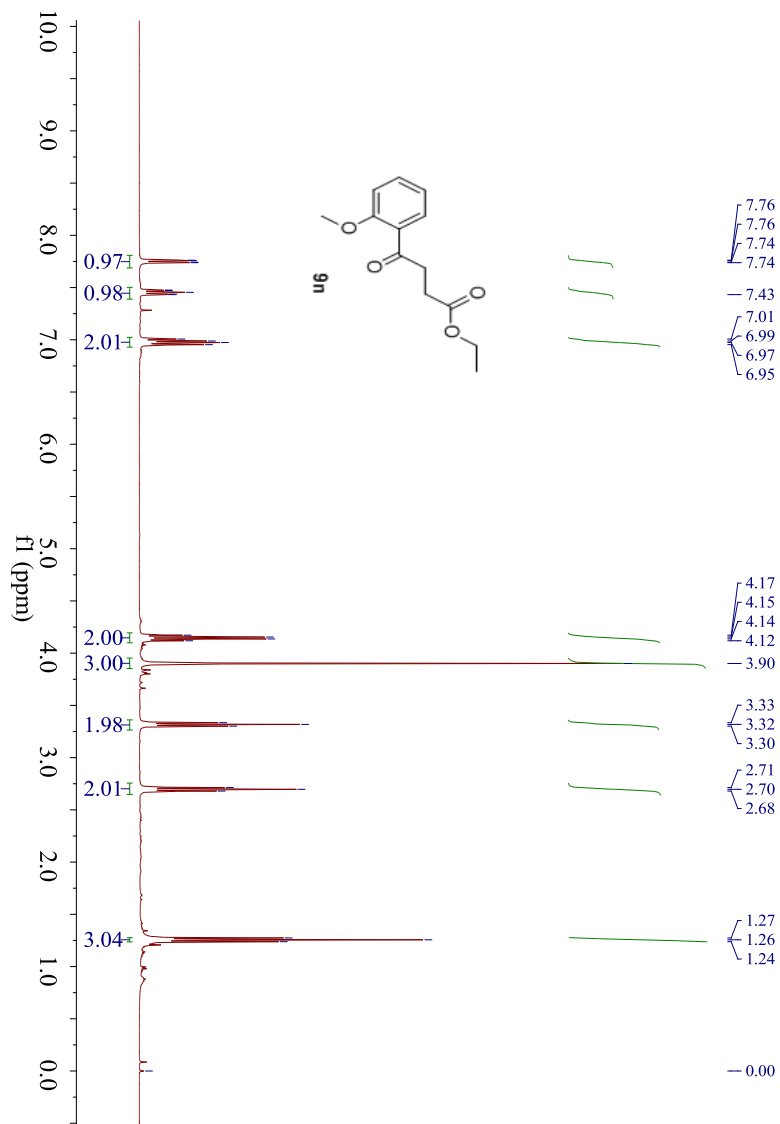



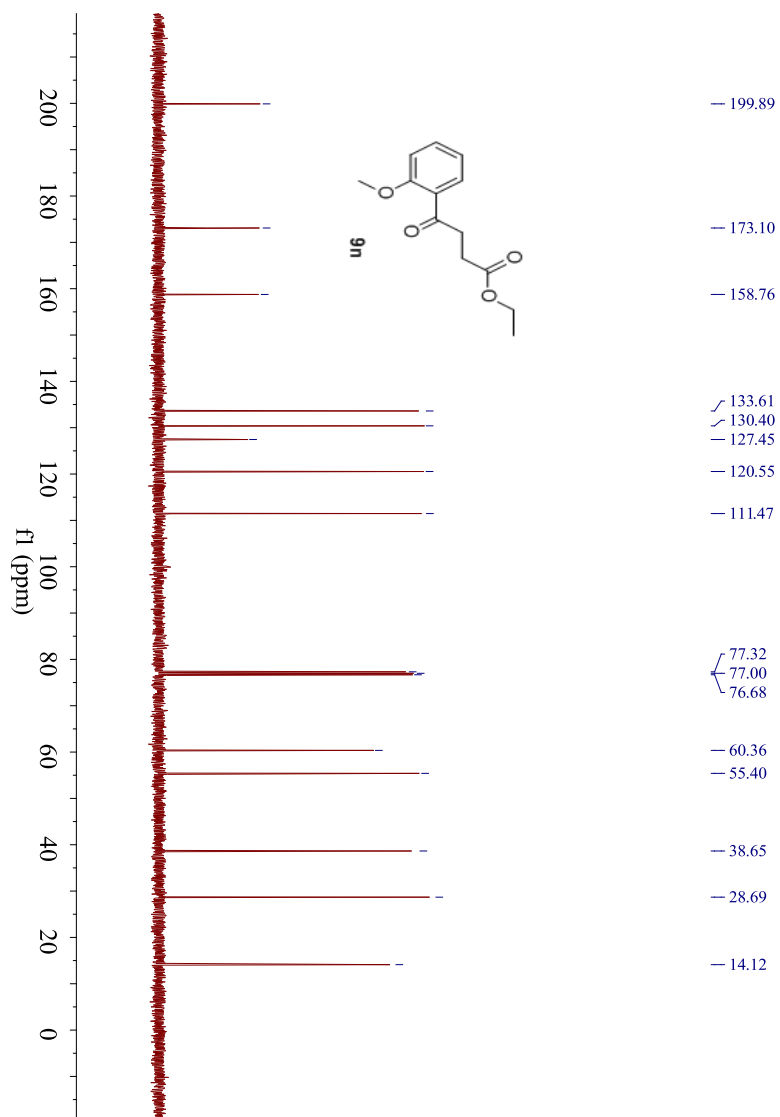

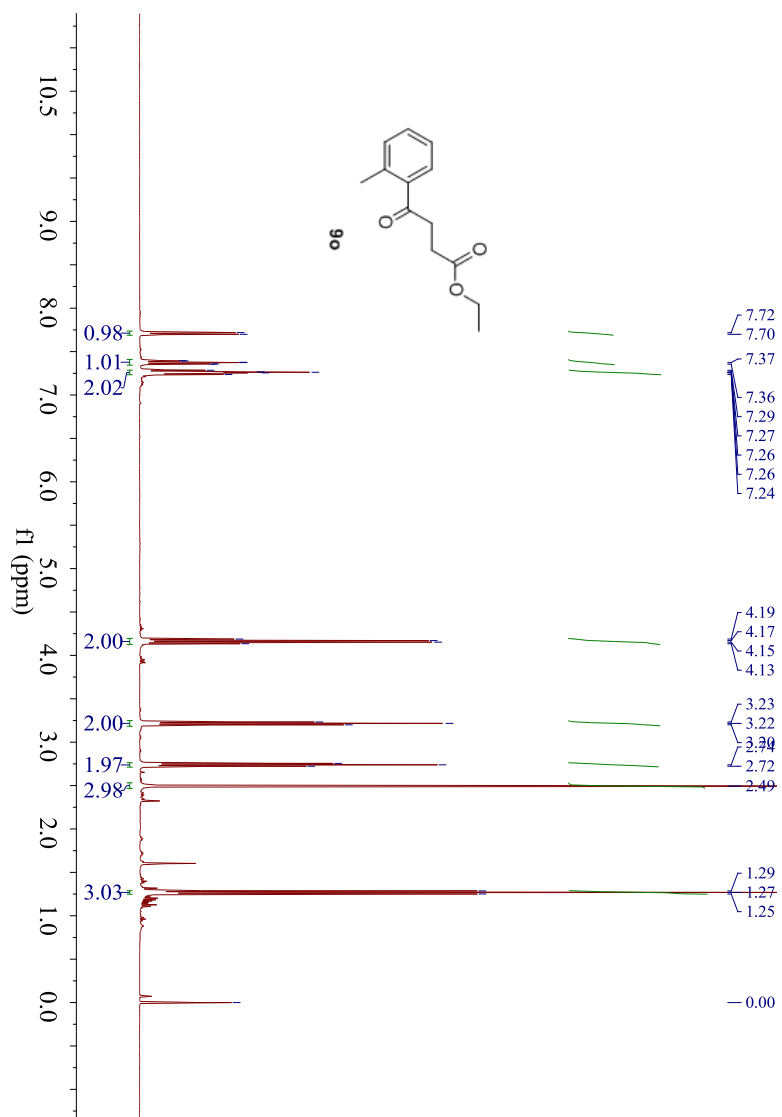

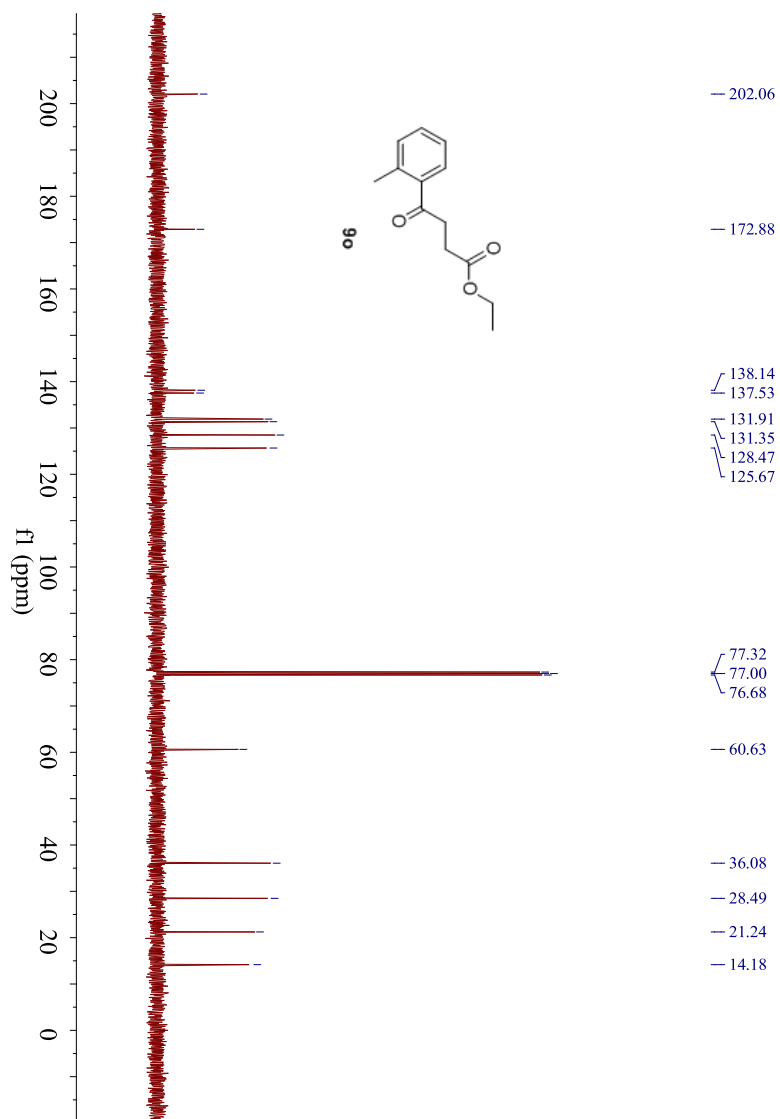

## MS Spectroscopic Data for Products

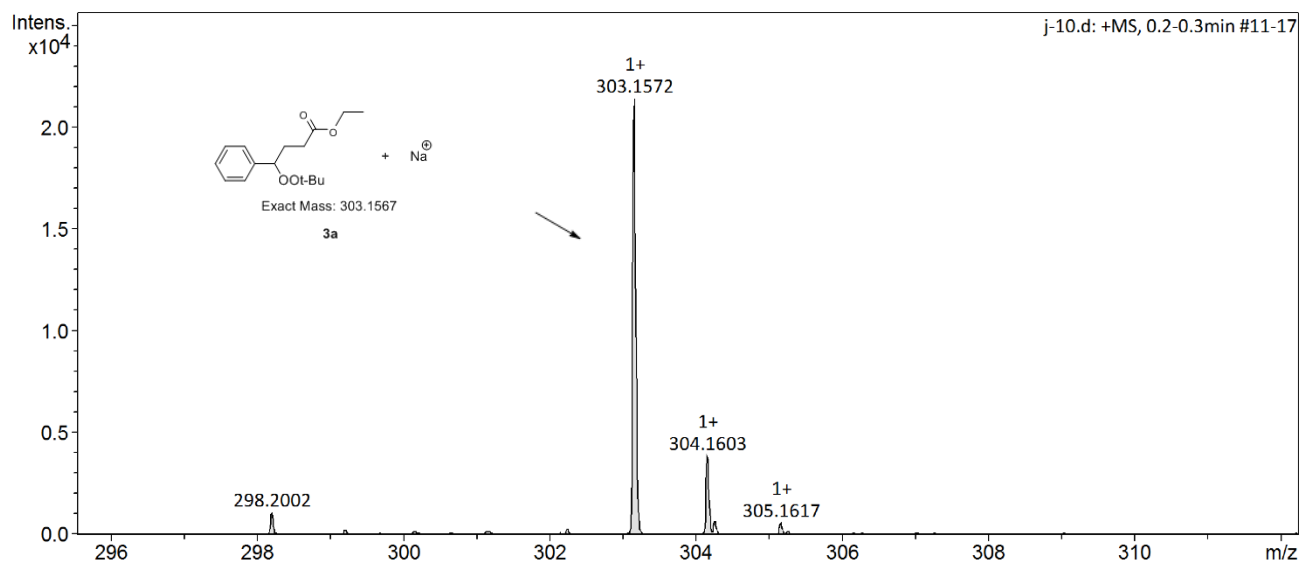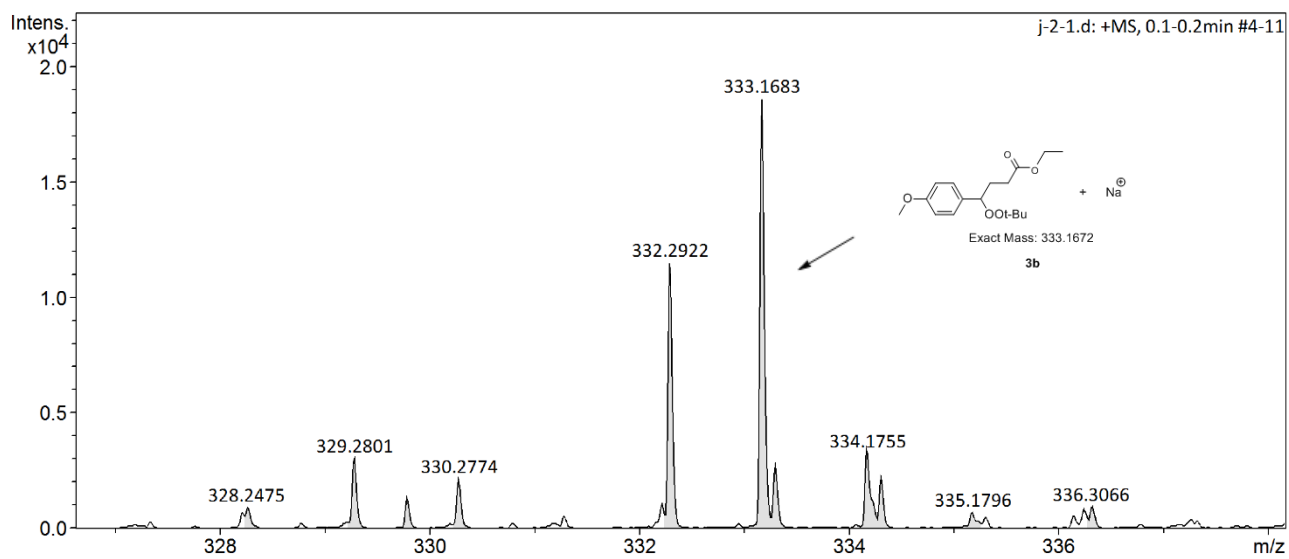

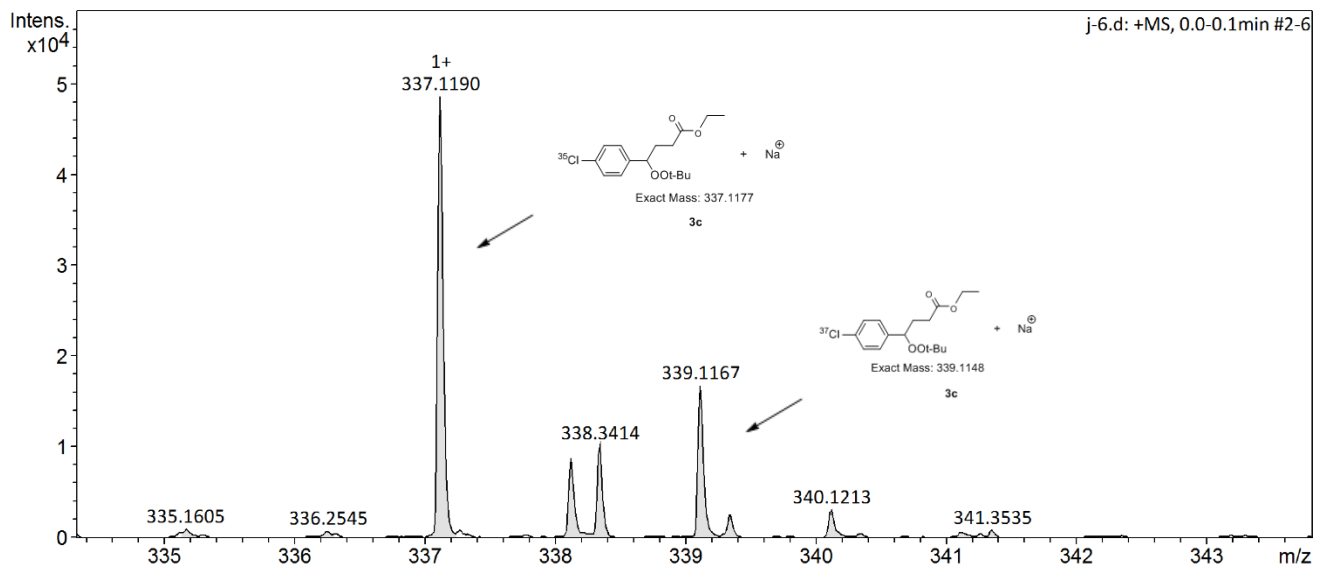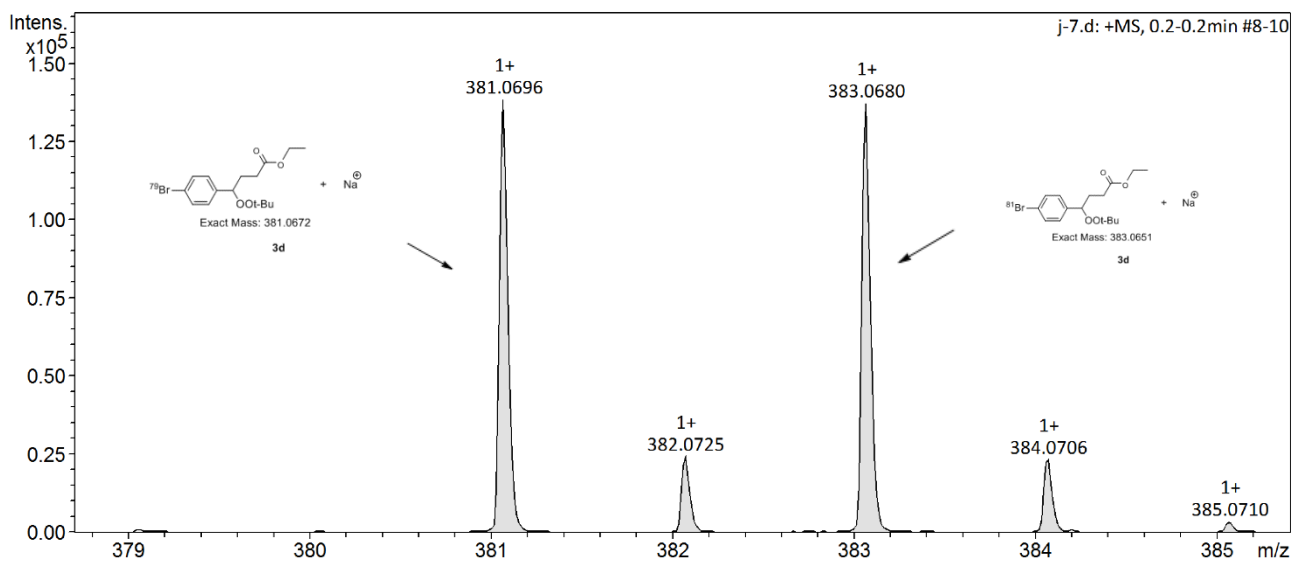

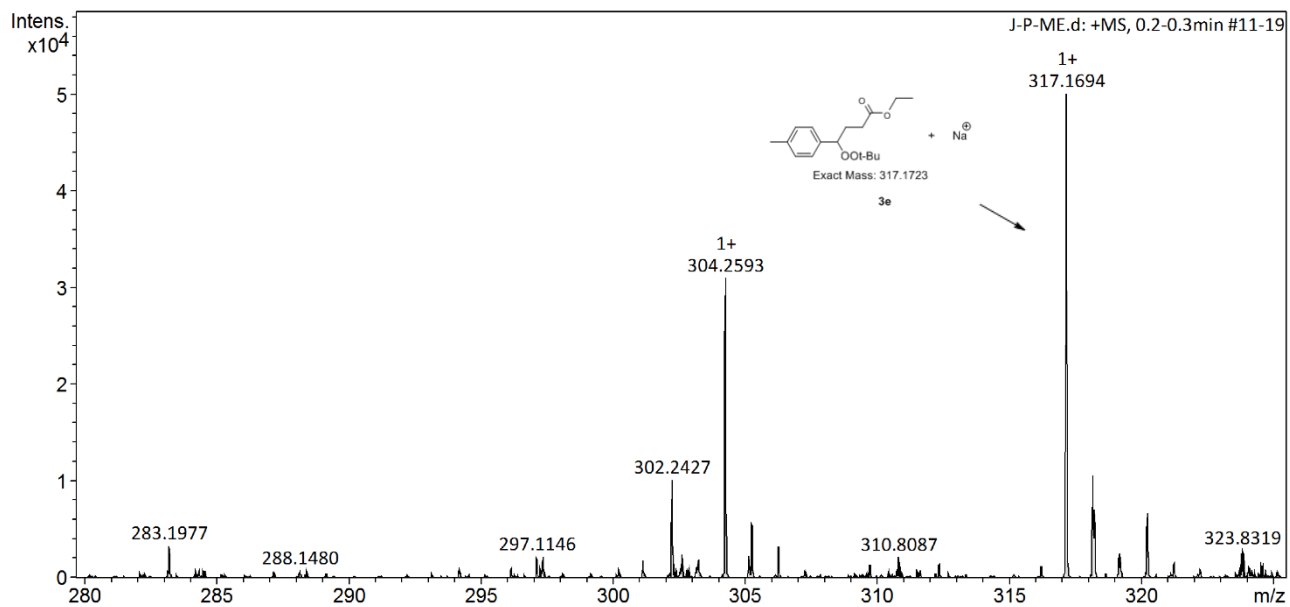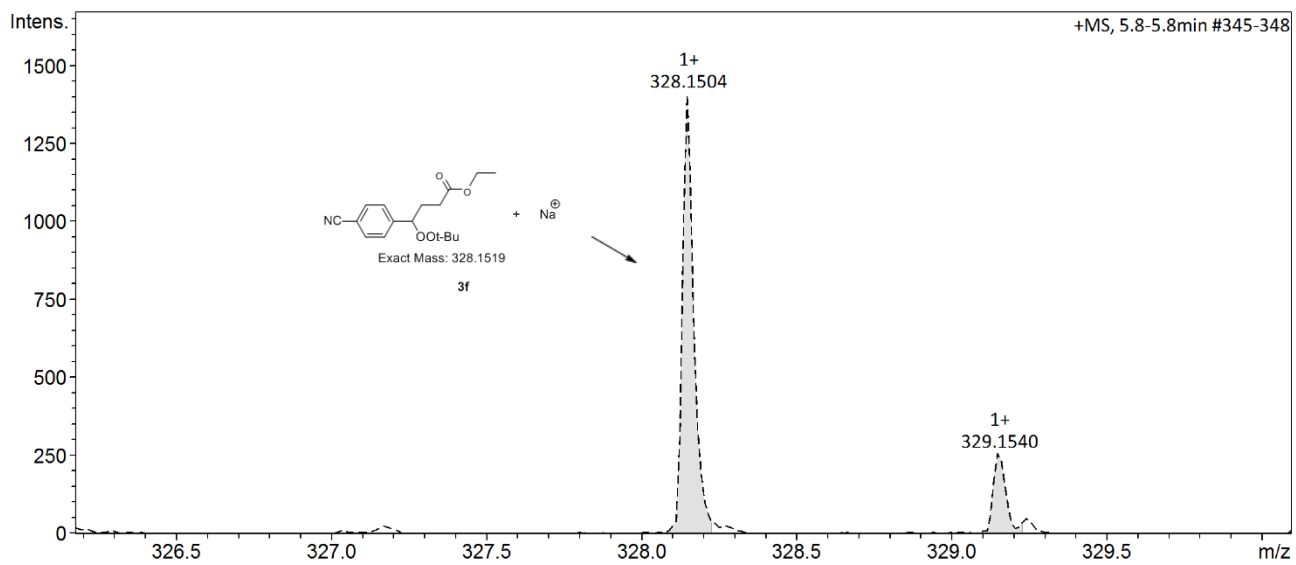

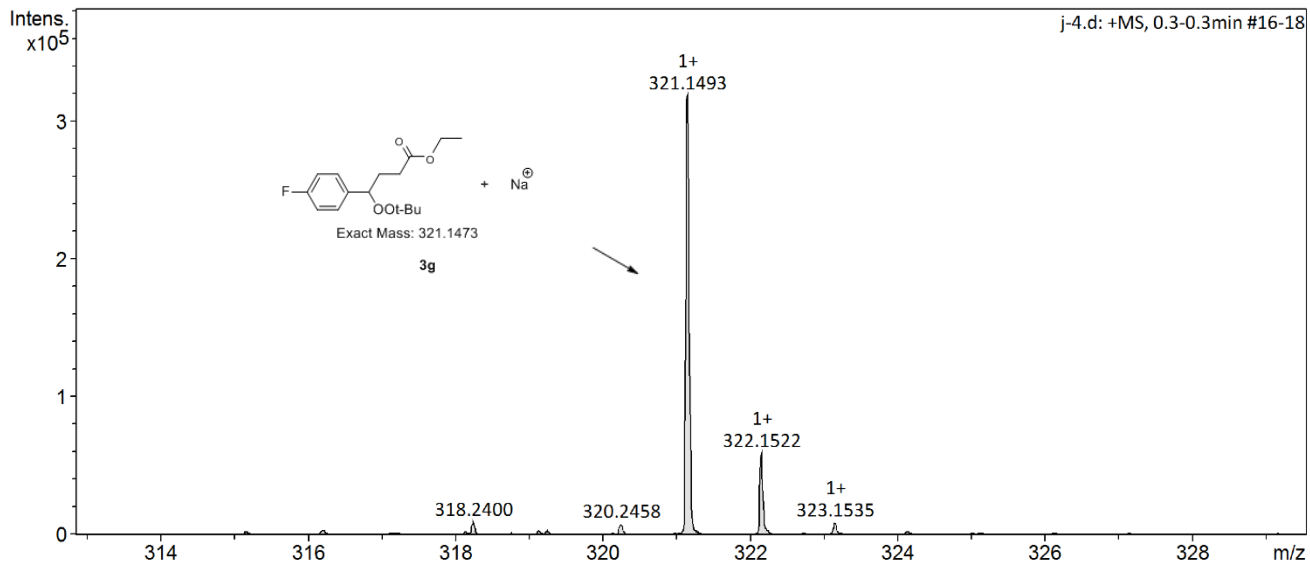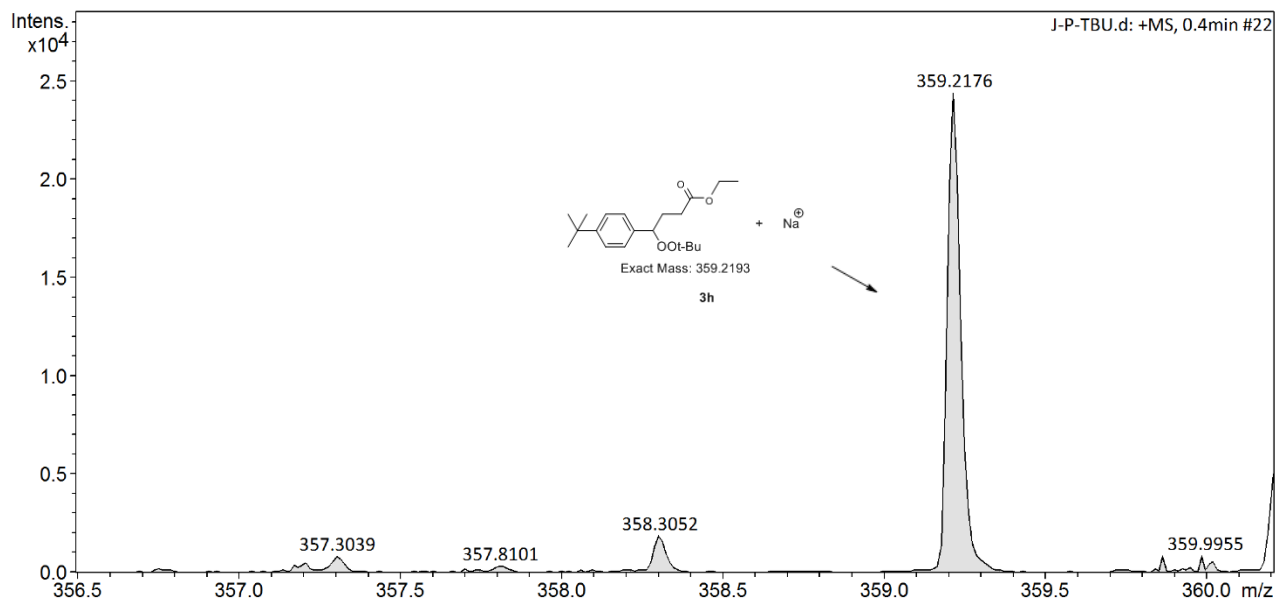

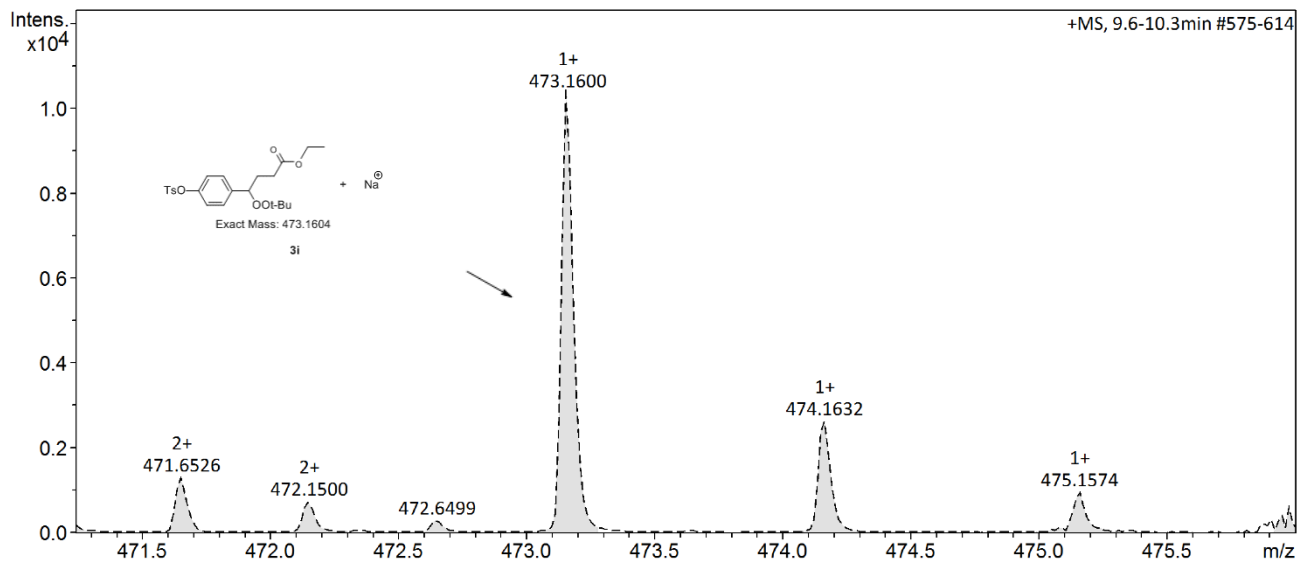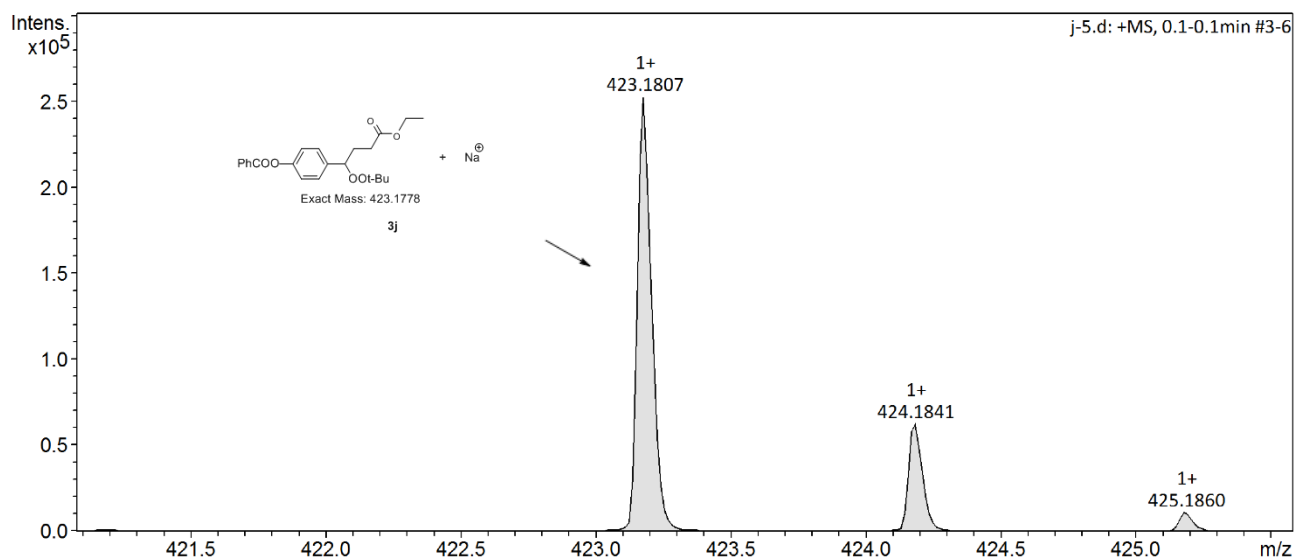



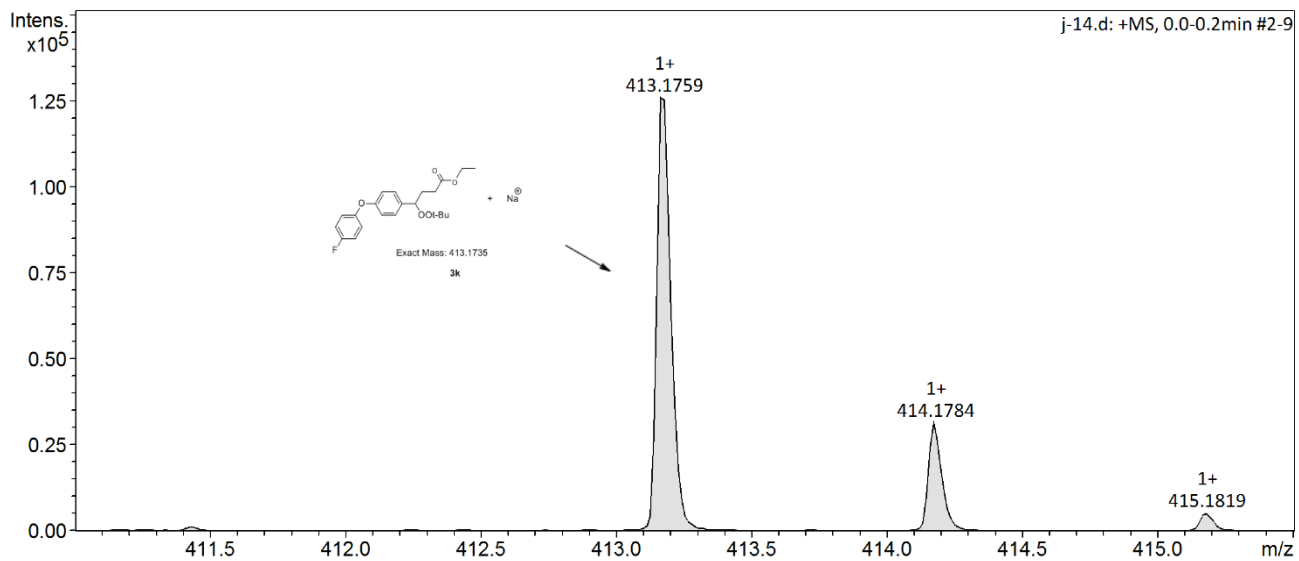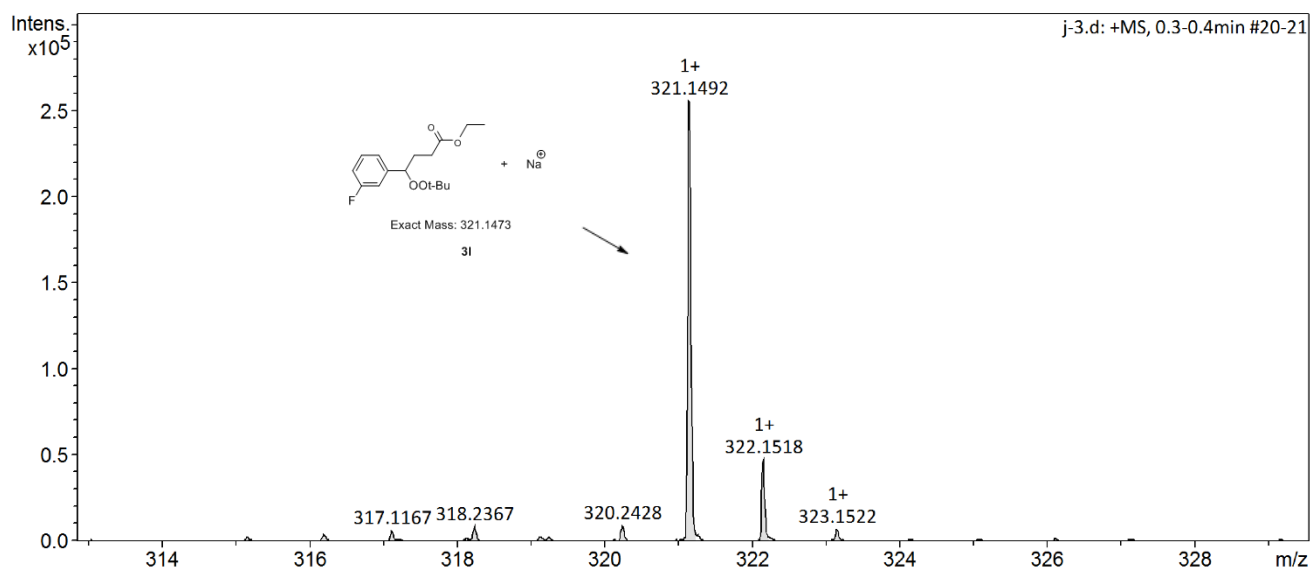

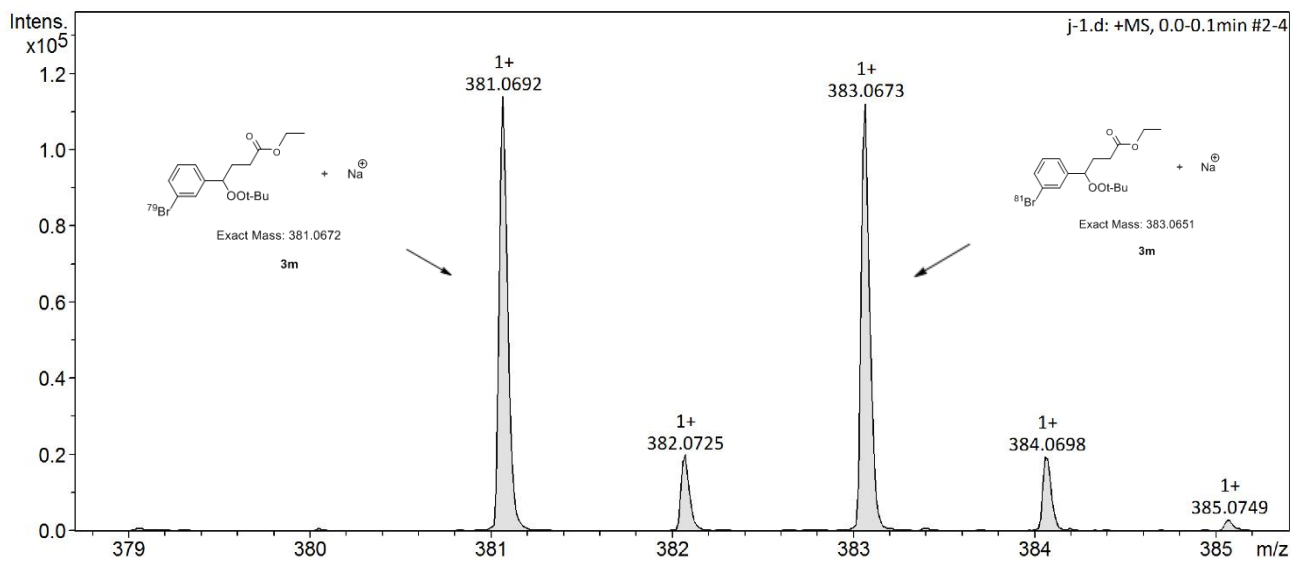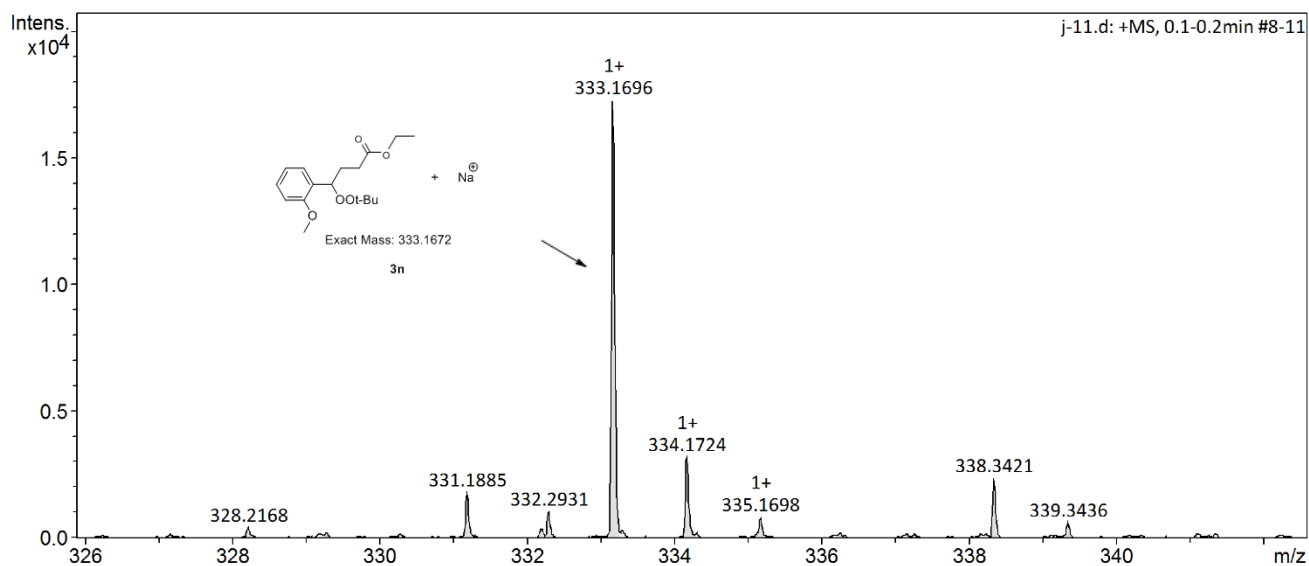

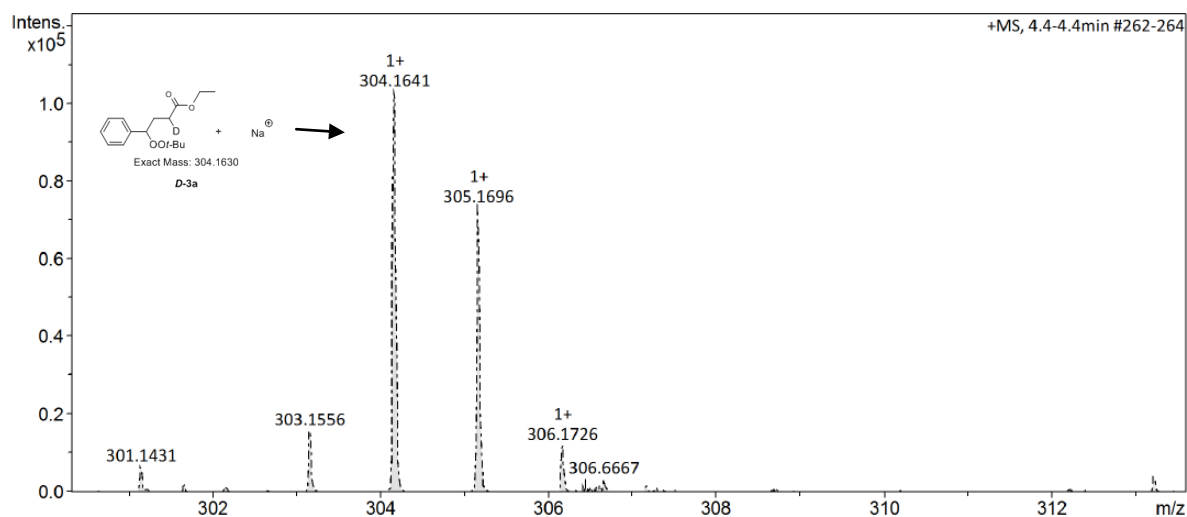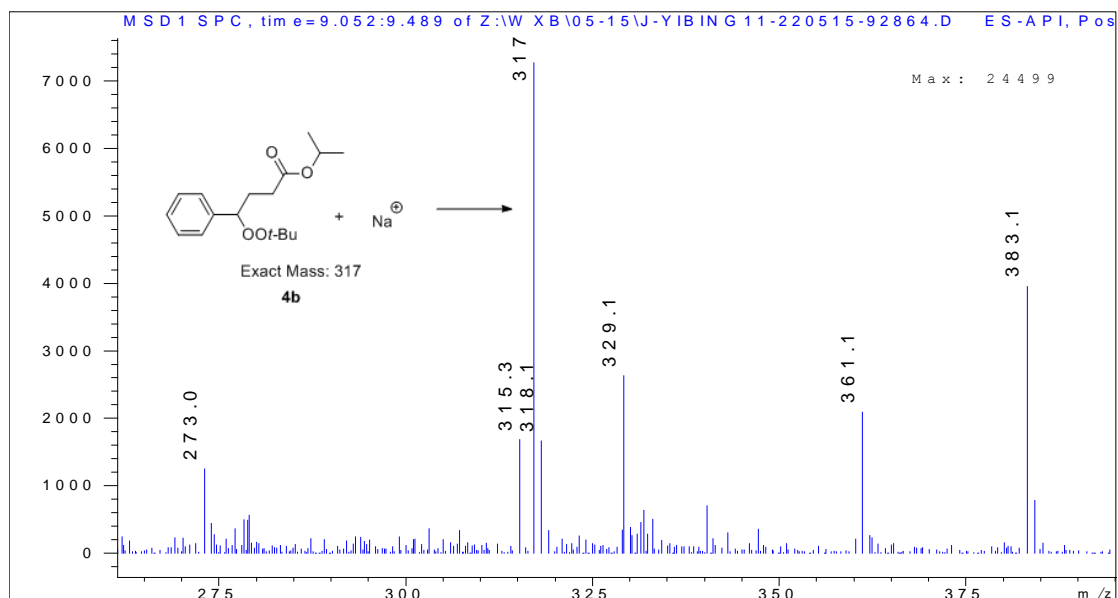

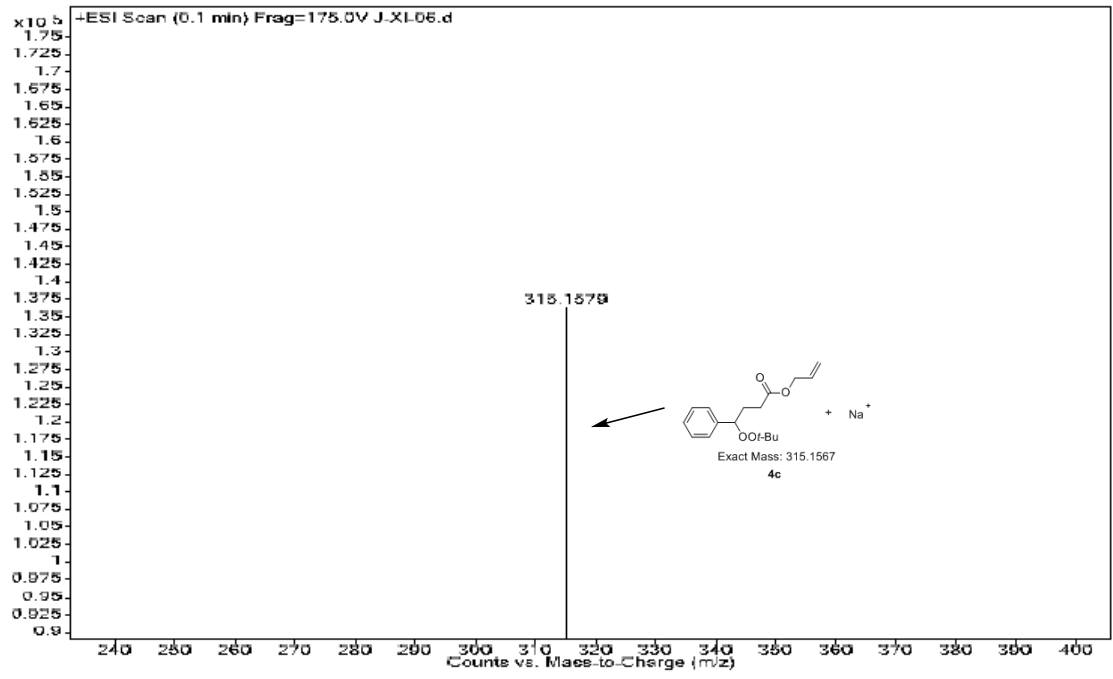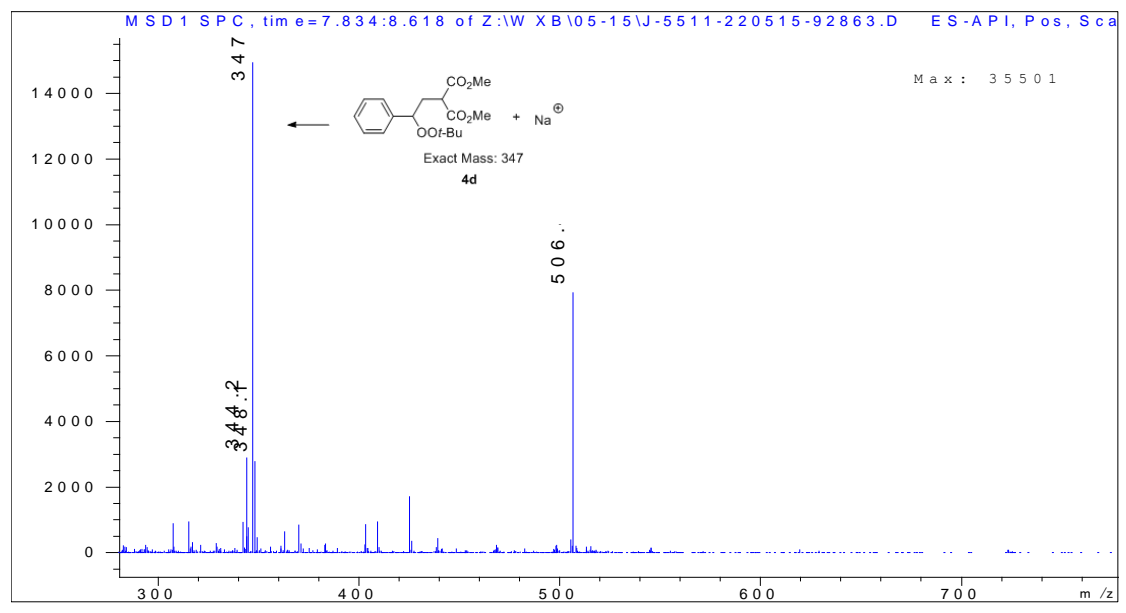

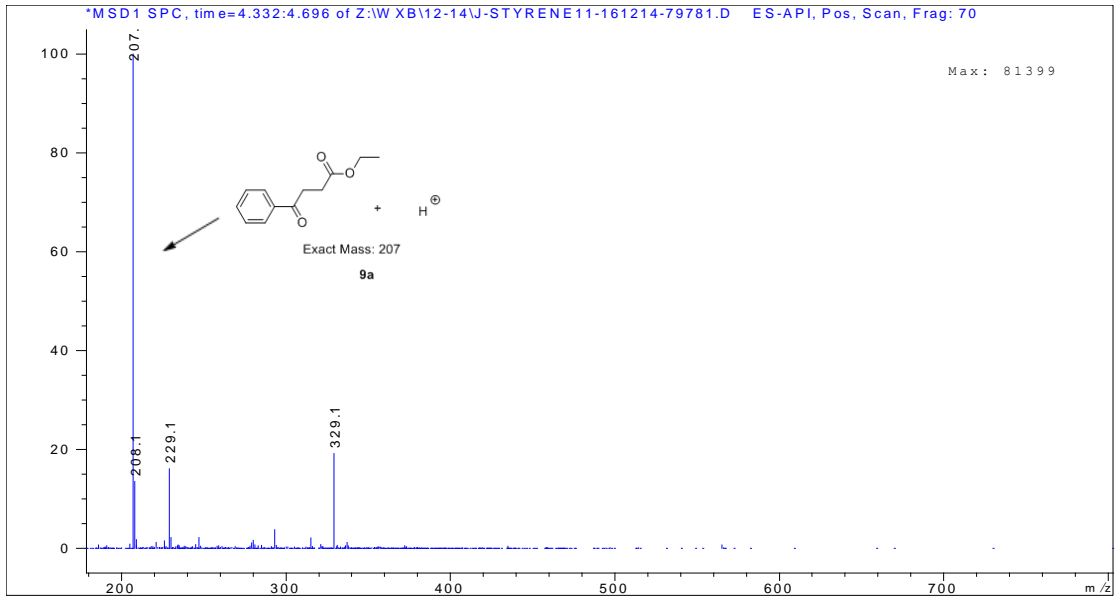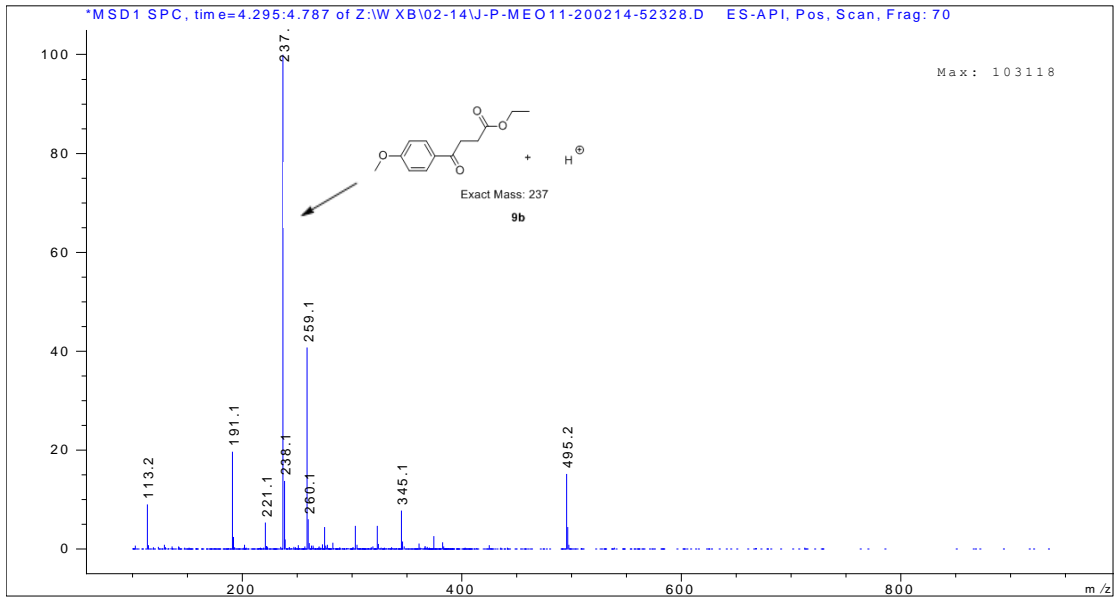

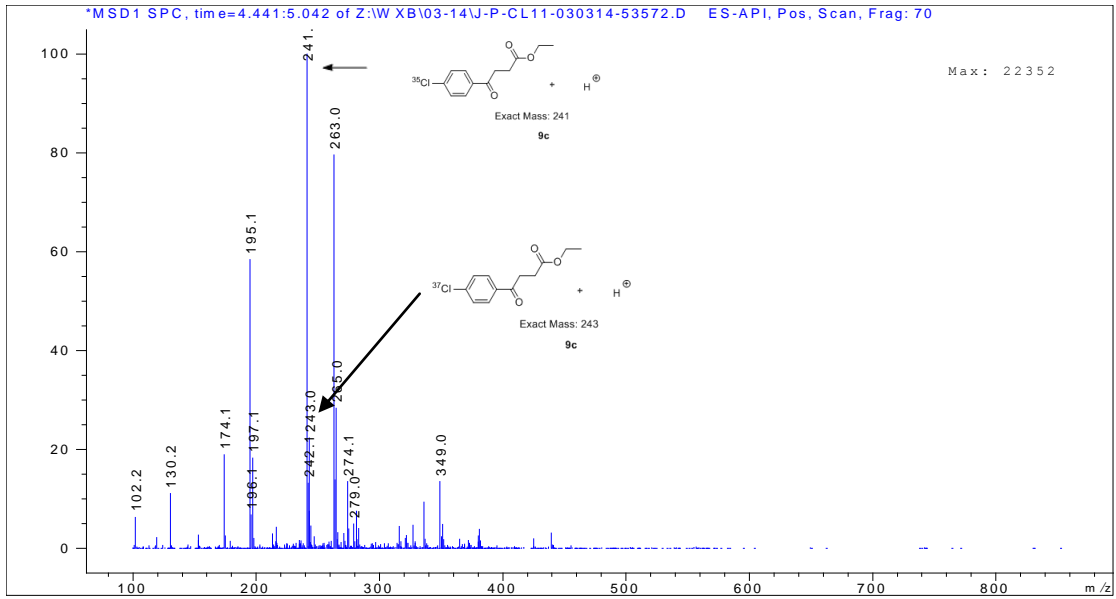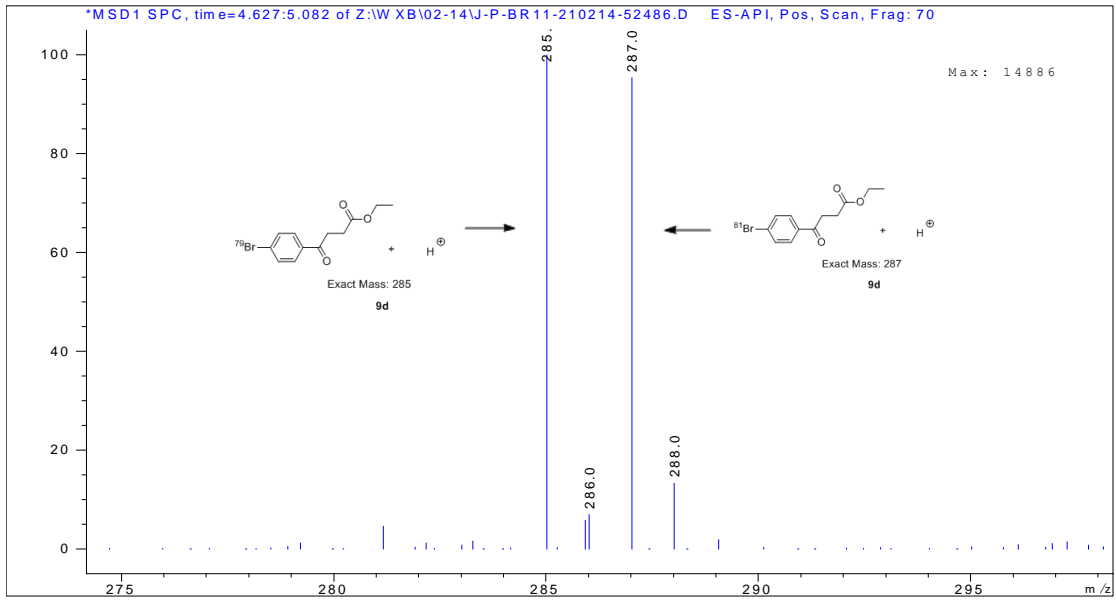

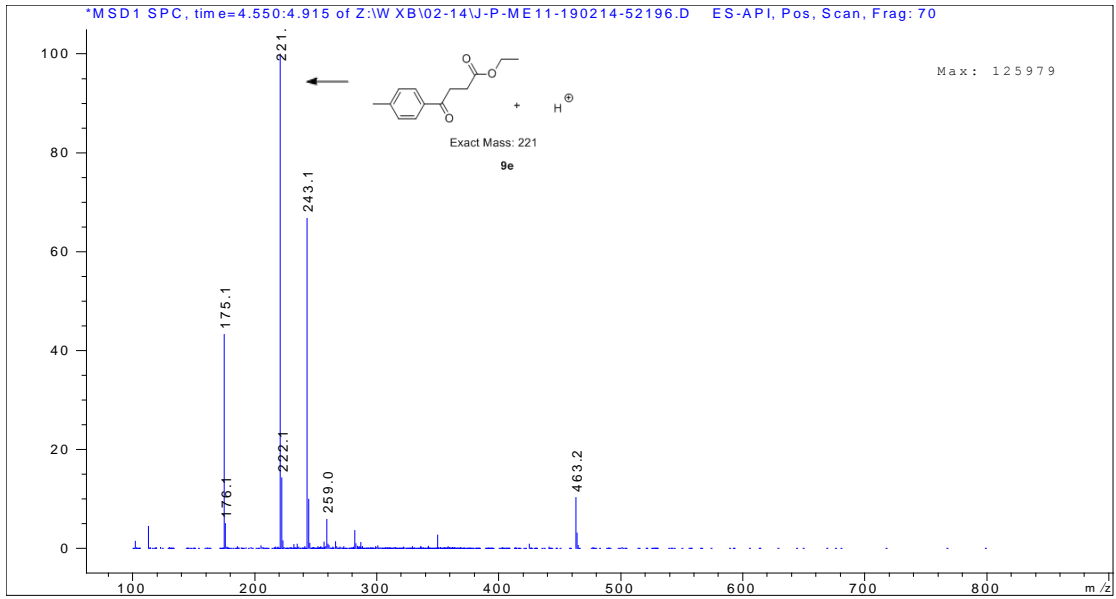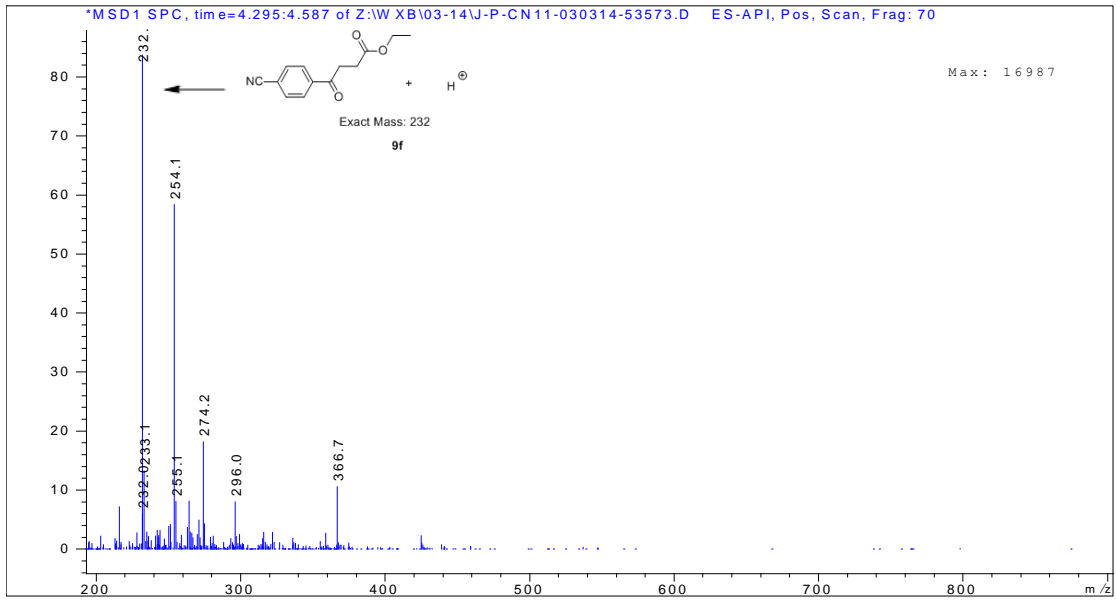

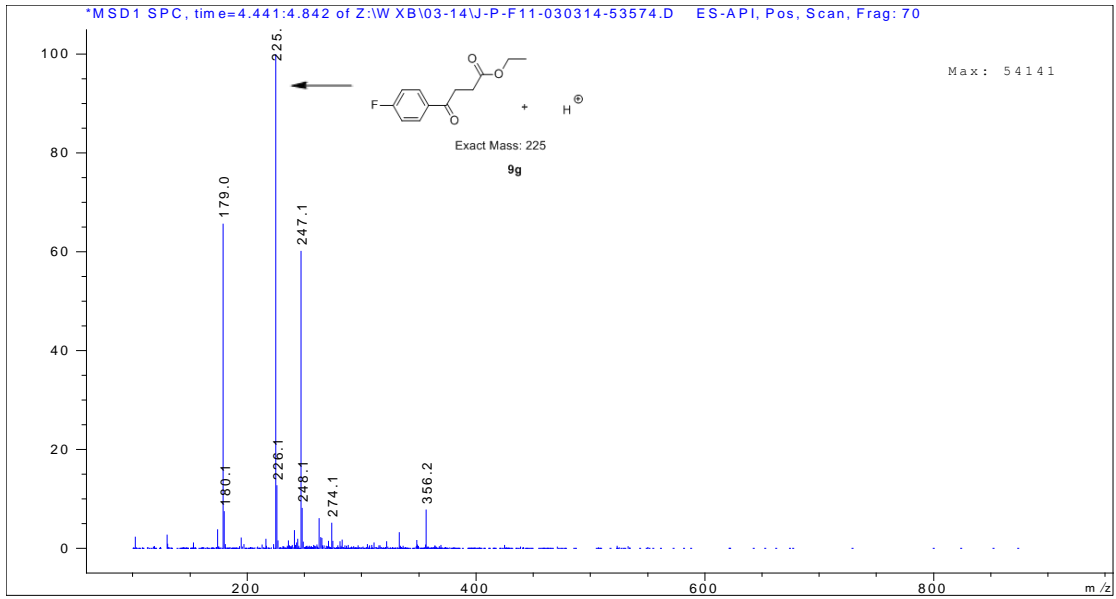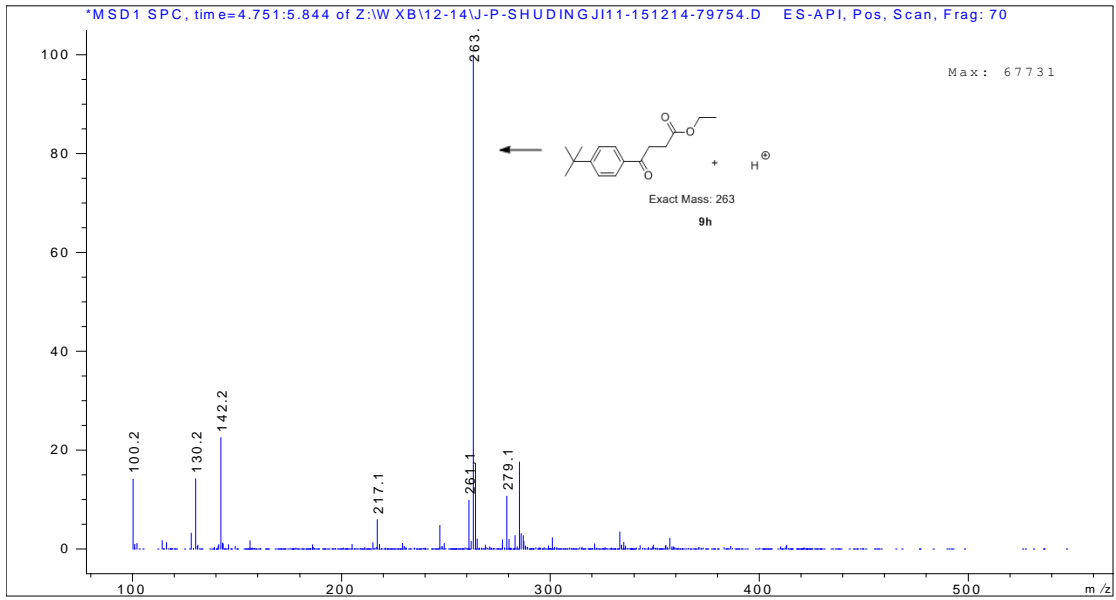



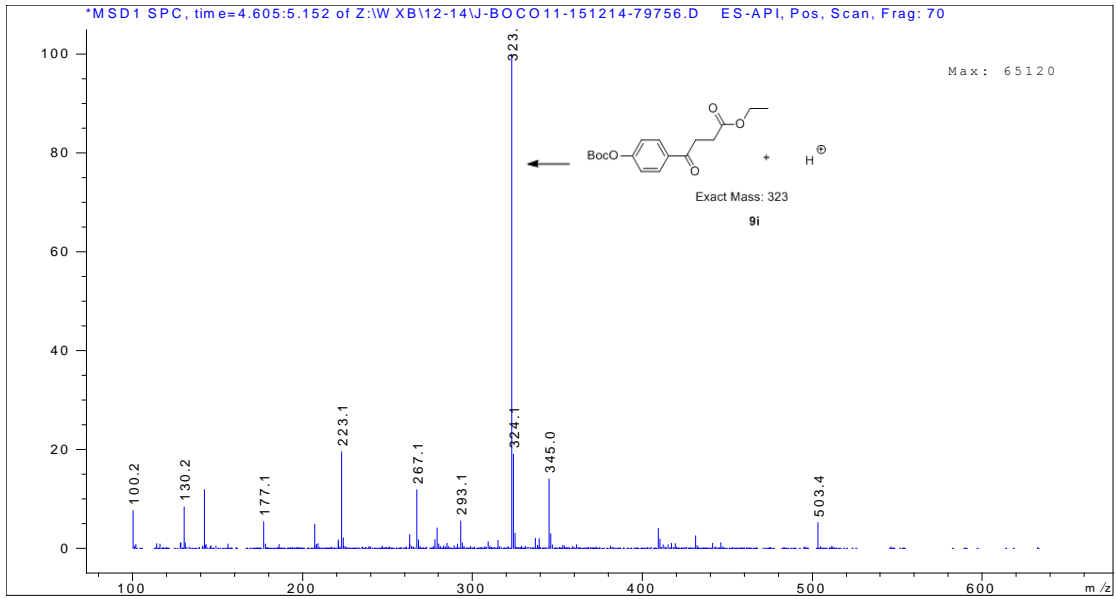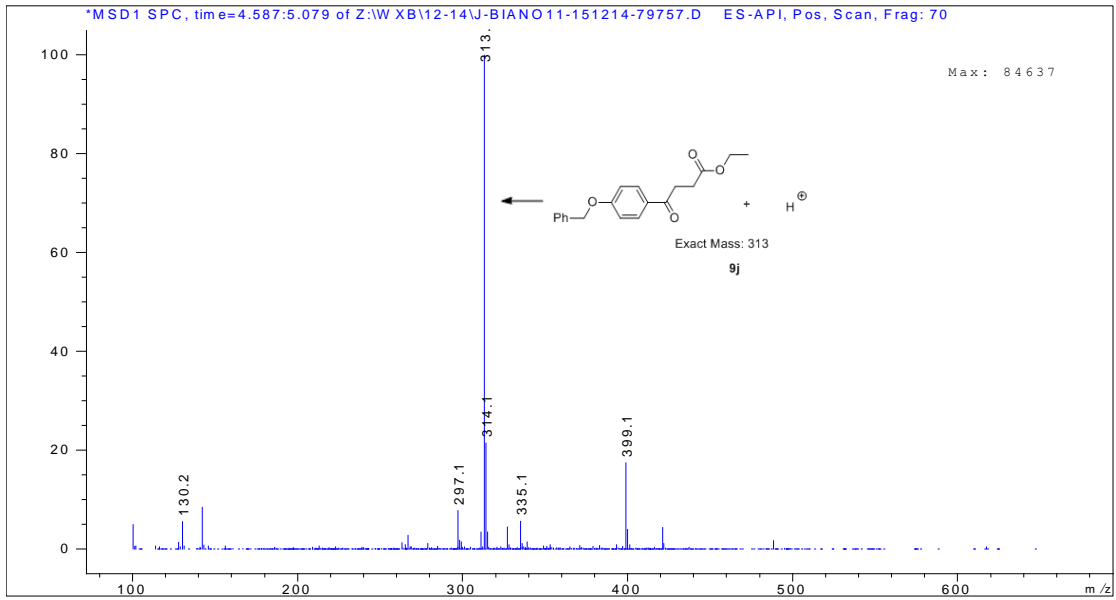

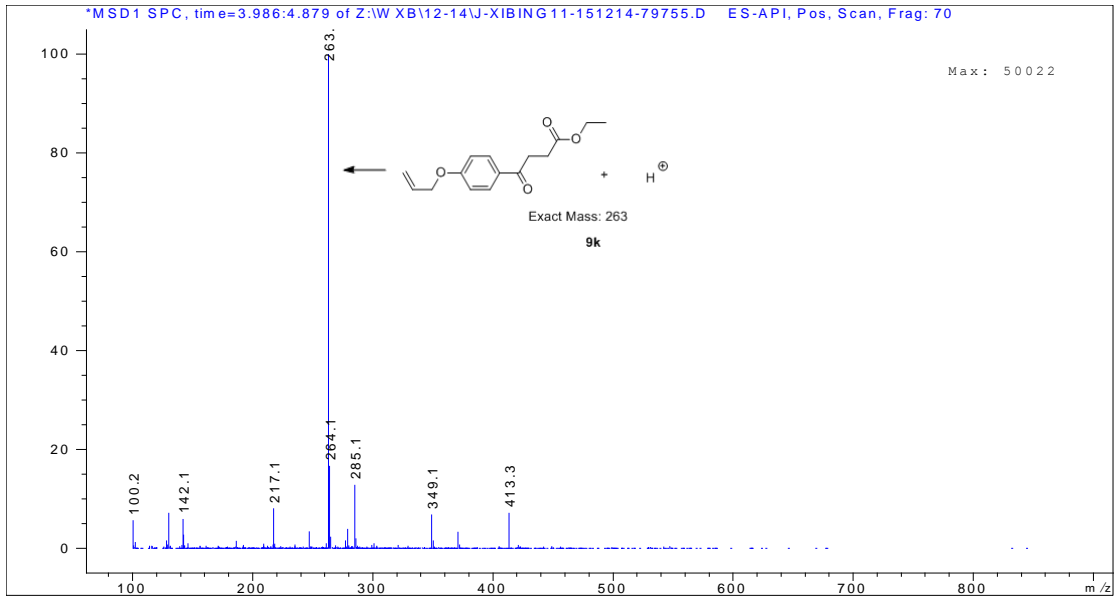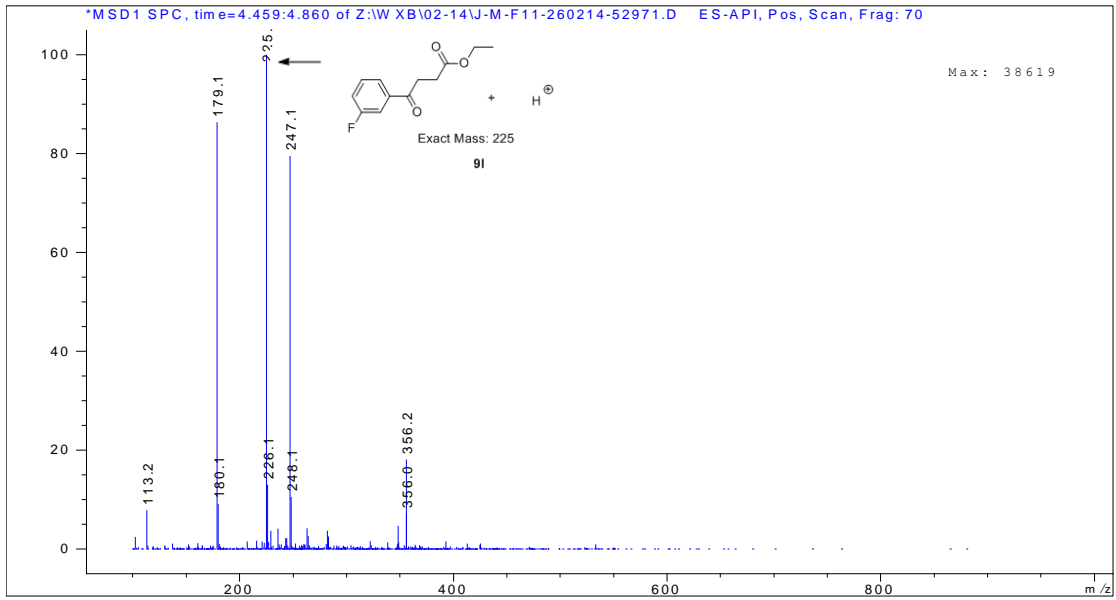

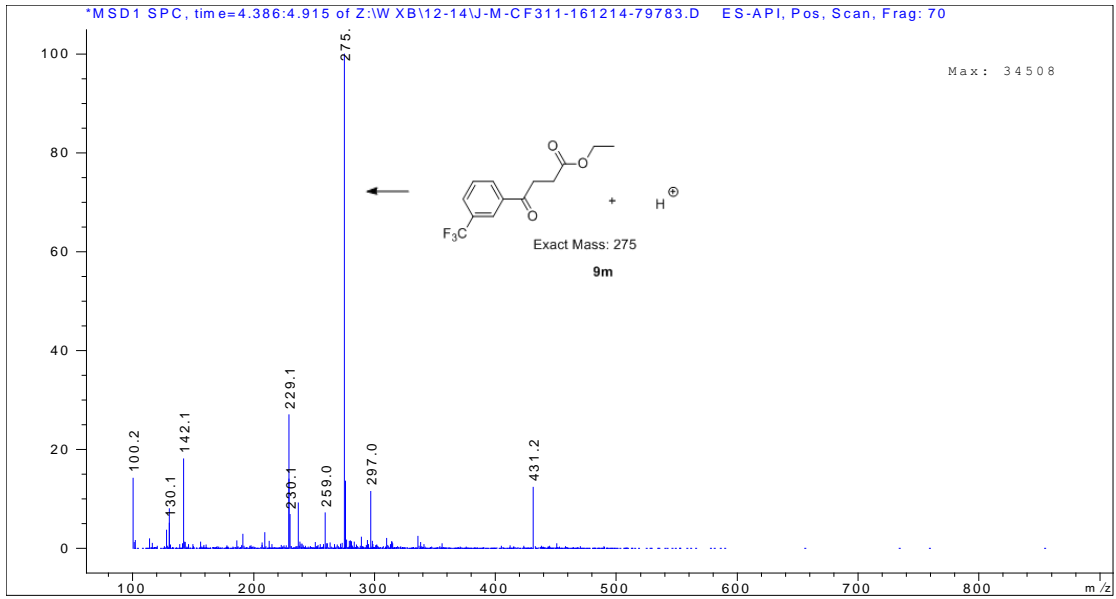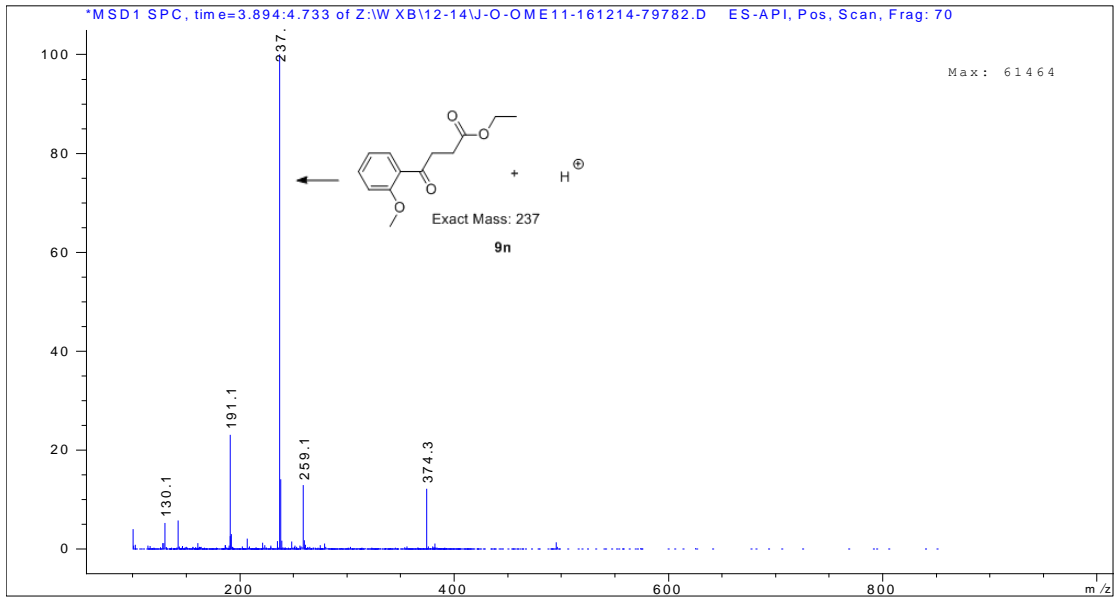

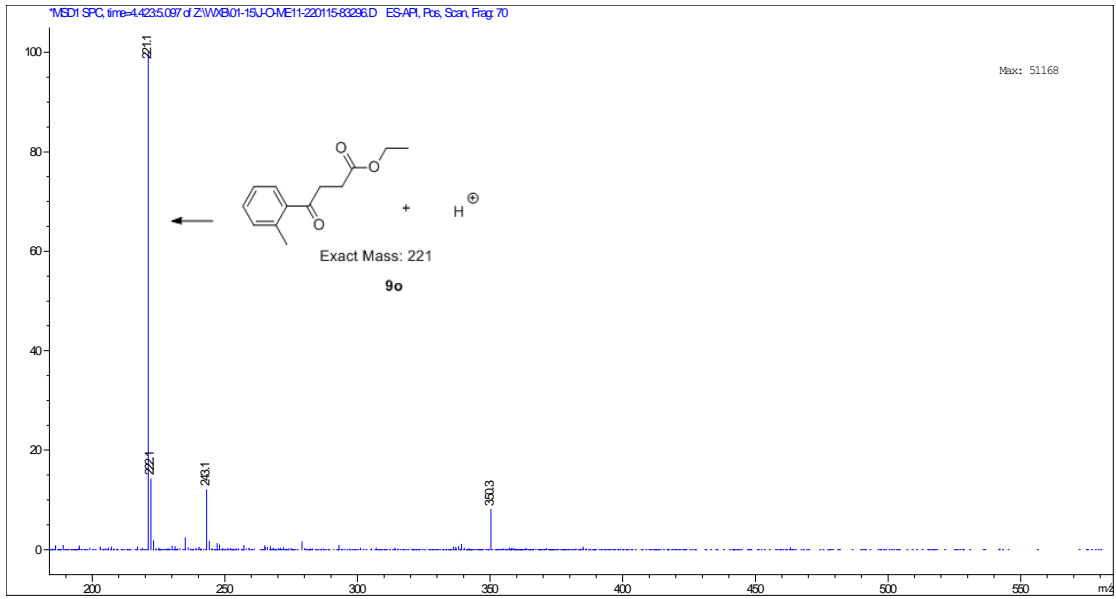

## Cartesian Coordinates and Energies

2a

| Center<br>Number | Atomic<br>Number | Atomic<br>Type | Coordinates (Angstroms) |           |           |
|------------------|------------------|----------------|-------------------------|-----------|-----------|
|                  |                  |                | X                       | Y         | Z         |
| 1                | 6                | 0              | -0.263054               | 0.961231  | -0.000009 |
| 2                | 8                | 0              | 0.156124                | 2.096547  | -0.000035 |
| 3                | 8                | 0              | 0.510366                | -0.140424 | 0.000143  |
| 4                | 6                | 0              | -1.682232               | 0.628546  | -0.000145 |
| 5                | 7                | 0              | -2.066143               | -0.617377 | -0.000015 |
| 6                | 7                | 0              | -2.386135               | -1.702806 | 0.000083  |
| 7                | 6                | 0              | 1.926001                | 0.097211  | 0.000198  |
| 8                | 1                | 0              | 2.186490                | 0.687888  | -0.883263 |
| 9                | 1                | 0              | 2.186473                | 0.687401  | 0.883993  |
| 10               | 1                | 0              | -2.449699               | 1.387039  | -0.000271 |
| 11               | 6                | 0              | 2.610347                | -1.252977 | -0.000187 |
| 12               | 1                | 0              | 2.334667                | -1.829165 | 0.887772  |
| 13               | 1                | 0              | 2.333695                | -1.829040 | -0.887929 |
| 14               | 1                | 0              | 3.696028                | -1.115898 | -0.000797 |

Zero-point correction= 0.106721 (Hartree/Particle)  
 Thermal correction to Energy= 0.114353  
 Thermal correction to Enthalpy= 0.115297  
 Thermal correction to Gibbs Free Energy= 0.074073  
 Sum of electronic and zero-point Energies= -415.696135  
 Sum of electronic and thermal Energies= -415.688503  
 Sum of electronic and thermal Enthalpies= -415.687559  
 Sum of electronic and thermal Free Energies= -415.728783  
 Sum of electronic and thermal Free Energies(343K)= -415.735156

### CuNO<sub>3</sub>-DABCO

| Center<br>Number | Atomic<br>Number | Atomic<br>Type | Coordinates (Angstroms) |           |           |
|------------------|------------------|----------------|-------------------------|-----------|-----------|
|                  |                  |                | X                       | Y         | Z         |
| 1                | 29               | 0              | 0.992104                | -0.710830 | -0.000014 |
| 2                | 7                | 0              | -0.823246               | -0.321931 | 0.000019  |
| 3                | 6                | 0              | -1.792978               | -1.445457 | 0.000008  |
| 4                | 1                | 0              | -1.586305               | -2.057326 | -0.881880 |
| 5                | 1                | 0              | -1.586239               | -2.057421 | 0.881815  |
| 6                | 6                | 0              | -1.057481               | 0.519957  | -1.208458 |
| 7                | 1                | 0              | -0.308152               | 1.315376  | -1.193745 |
| 8                | 1                | 0              | -0.861526               | -0.103508 | -2.085383 |
| 9                | 6                | 0              | -1.057493               | 0.519961  | 1.208480  |
| 10               | 1                | 0              | -0.308089               | 1.315311  | 1.193844  |
| 11               | 1                | 0              | -0.861668               | -0.103537 | 2.085413  |
| 12               | 7                | 0              | 3.155716                | 0.424824  | 0.000004  |
| 13               | 8                | 0              | 2.190306                | 1.228789  | -0.000084 |
| 14               | 8                | 0              | 2.837685                | -0.841299 | 0.000007  |
| 15               | 8                | 0              | 4.315869                | 0.756416  | 0.000071  |
| 16               | 6                | 0              | -3.239199               | -0.876876 | 0.000090  |
| 17               | 1                | 0              | -3.792761               | -1.213218 | -0.882116 |
| 18               | 1                | 0              | -3.792613               | -1.213096 | 0.882435  |
| 19               | 6                | 0              | -2.512639               | 1.058082  | -1.190901 |
| 20               | 1                | 0              | -2.526217               | 2.152270  | -1.188944 |
| 21               | 1                | 0              | -3.064633               | 0.724064  | -2.074947 |
| 22               | 6                | 0              | -2.512595               | 1.058231  | 1.190819  |
| 23               | 1                | 0              | -3.064620               | 0.724444  | 2.074932  |
| 24               | 1                | 0              | -2.526057               | 2.152422  | 1.188650  |
| 25               | 7                | 0              | -3.219429               | 0.586201  | 0.000000  |

Zero-point correction= 0.206087 (Hartree/Particle)  
 Thermal correction to Energy= 0.218441  
 Thermal correction to Enthalpy= 0.219386  
 Thermal correction to Gibbs Free Energy= 0.163946  
 Sum of electronic and zero-point Energies= -2265.580957  
 Sum of electronic and thermal Energies= -2265.568602  
 Sum of electronic and thermal Enthalpies= -2265.567658  
 Sum of electronic and thermal Free Energies= -2265.623097

Sum of electronic and thermal Free Energies(343K)= -2265.631714

**INT1**

| Center Number | Atomic Number | Atomic Type | Coordinates (Angstroms) |           |           |
|---------------|---------------|-------------|-------------------------|-----------|-----------|
|               |               |             | X                       | Y         | Z         |
| 1             | 6             | 0           | 2.401479                | -0.771091 | -0.520443 |
| 2             | 8             | 0           | 3.385115                | -0.103835 | -0.723732 |
| 3             | 8             | 0           | 2.069688                | -1.343582 | 0.648848  |
| 4             | 6             | 0           | 1.424519                | -1.128881 | -1.596292 |
| 5             | 7             | 0           | 0.840089                | -2.324546 | -1.462244 |
| 6             | 7             | 0           | 0.323217                | -3.314061 | -1.316366 |
| 7             | 6             | 0           | 2.856876                | -0.924536 | 1.783904  |
| 8             | 1             | 0           | 3.852329                | -1.369536 | 1.695638  |
| 9             | 1             | 0           | 2.948401                | 0.162637  | 1.747510  |
| 10            | 1             | 0           | 1.740741                | -0.933591 | -2.617167 |
| 11            | 29            | 0           | 0.362902                | 0.334455  | -0.826770 |
| 12            | 7             | 0           | -1.526874               | 0.079582  | -0.205049 |
| 13            | 6             | 0           | -2.359359               | -0.736071 | -1.115433 |
| 14            | 1             | 0           | -2.383060               | -0.231454 | -2.086229 |
| 15            | 1             | 0           | -1.860691               | -1.700376 | -1.252789 |
| 16            | 6             | 0           | -2.172535               | 1.403237  | -0.018761 |
| 17            | 1             | 0           | -1.527319               | 1.983188  | 0.645576  |
| 18            | 1             | 0           | -2.183848               | 1.907066  | -0.989453 |
| 19            | 6             | 0           | -1.455271               | -0.593453 | 1.115033  |
| 20            | 1             | 0           | -0.818945               | 0.023755  | 1.754360  |
| 21            | 1             | 0           | -0.949469               | -1.554244 | 0.974986  |
| 22            | 7             | 0           | 1.252730                | 2.527166  | -0.010291 |
| 23            | 8             | 0           | 1.061788                | 1.591360  | 0.831868  |
| 24            | 8             | 0           | 0.937201                | 2.251995  | -1.217677 |
| 25            | 8             | 0           | 1.689860                | 3.610323  | 0.307484  |
| 26            | 6             | 0           | -3.781918               | -0.908276 | -0.512833 |
| 27            | 1             | 0           | -4.546148               | -0.504013 | -1.184389 |
| 28            | 1             | 0           | -4.013913               | -1.965621 | -0.348921 |
| 29            | 6             | 0           | -3.599326               | 1.210541  | 0.562910  |
| 30            | 1             | 0           | -3.706427               | 1.723911  | 1.523545  |
| 31            | 1             | 0           | -4.360360               | 1.614822  | -0.112281 |
| 32            | 6             | 0           | -2.887269               | -0.765294 | 1.691972  |
| 33            | 1             | 0           | -3.122237               | -1.821875 | 1.857140  |
| 34            | 1             | 0           | -2.988951               | -0.251827 | 2.653200  |
| 35            | 7             | 0           | -3.879800               | -0.212076 | 0.769253  |
| 36            | 6             | 0           | 2.128692                | -1.389905 | 3.024508  |
| 37            | 1             | 0           | 1.147347                | -0.911605 | 3.091401  |
| 38            | 1             | 0           | 1.994054                | -2.475885 | 3.021953  |
| 39            | 1             | 0           | 2.704256                | -1.114739 | 3.913386  |

Zero-point correction= 0.314757 (Hartree/Particle)  
 Thermal correction to Energy= 0.336818  
 Thermal correction to Enthalpy= 0.337762  
 Thermal correction to Gibbs Free Energy= 0.260777  
 Sum of electronic and zero-point Energies= -2681.307481  
 Sum of electronic and thermal Energies= -2681.285421  
 Sum of electronic and thermal Enthalpies= -2681.284477  
 Sum of electronic and thermal Free Energies= -2681.361461  
 Sum of electronic and thermal Free Energies(343k)= -2681.373508

**TS1**

| Center Number | Atomic Number | Atomic Type | Coordinates (Angstroms) |           |           |
|---------------|---------------|-------------|-------------------------|-----------|-----------|
|               |               |             | X                       | Y         | Z         |
| 1             | 6             | 0           | 2.683421                | -0.441738 | -0.681818 |
| 2             | 8             | 0           | 3.554480                | 0.356327  | -0.933520 |
| 3             | 8             | 0           | 2.566799                | -1.120027 | 0.465360  |
| 4             | 6             | 0           | 1.530903                | -0.637438 | -1.604585 |
| 5             | 7             | 0           | 1.124346                | -2.320076 | -1.419225 |
| 6             | 7             | 0           | 0.494601                | -3.199637 | -1.176008 |
| 7             | 6             | 0           | 3.441665                | -0.691255 | 1.526890  |
| 8             | 1             | 0           | 4.478813                | -0.857076 | 1.221960  |
| 9             | 1             | 0           | 3.287194                | 0.380533  | 1.674576  |
| 10            | 1             | 0           | 1.846542                | -0.697195 | -2.646379 |
| 11            | 29            | 0           | 0.190834                | 0.396389  | -0.933295 |
| 12            | 7             | 0           | -1.619269               | -0.006238 | -0.165035 |

|    |   |   |           |           |           |
|----|---|---|-----------|-----------|-----------|
| 13 | 6 | 0 | -2.415490 | -0.809515 | -1.118155 |
| 14 | 1 | 0 | -2.605461 | -0.185881 | -1.997364 |
| 15 | 1 | 0 | -1.802146 | -1.657610 | -1.440298 |
| 16 | 6 | 0 | -2.388851 | 1.207098  | 0.206001  |
| 17 | 1 | 0 | -1.796803 | 1.741703  | 0.952464  |
| 18 | 1 | 0 | -2.458023 | 1.847006  | -0.677338 |
| 19 | 6 | 0 | -1.392081 | -0.806103 | 1.063506  |
| 20 | 1 | 0 | -0.733718 | -0.223674 | 1.712474  |
| 21 | 1 | 0 | -0.857057 | -1.716683 | 0.773619  |
| 22 | 7 | 0 | 0.699737  | 2.609657  | 0.177571  |
| 23 | 8 | 0 | 0.851078  | 1.579212  | 0.897420  |
| 24 | 8 | 0 | 0.269824  | 2.400875  | -1.014391 |
| 25 | 8 | 0 | 0.924572  | 3.731308  | 0.575685  |
| 26 | 6 | 0 | -3.733824 | -1.272850 | -0.438417 |
| 27 | 1 | 0 | -4.605713 | -0.988711 | -1.036380 |
| 28 | 1 | 0 | -3.755897 | -2.361220 | -0.320473 |
| 29 | 6 | 0 | -3.779712 | 0.788359  | 0.753728  |
| 30 | 1 | 0 | -3.966725 | 1.238822  | 1.733472  |
| 31 | 1 | 0 | -4.583072 | 1.113069  | 0.084639  |
| 32 | 6 | 0 | -2.756766 | -1.130224 | 1.730289  |
| 33 | 1 | 0 | -2.871552 | -2.206816 | 1.892960  |
| 34 | 1 | 0 | -2.845403 | -0.639342 | 2.704528  |
| 35 | 7 | 0 | -3.860480 | -0.668072 | 0.886720  |
| 36 | 6 | 0 | 3.073527  | -1.491245 | 2.756938  |
| 37 | 1 | 0 | 2.030877  | -1.309720 | 3.033479  |
| 38 | 1 | 0 | 3.211263  | -2.563126 | 2.585639  |
| 39 | 1 | 0 | 3.709381  | -1.190906 | 3.595145  |

-----

Zero-point correction= 0.311942 (Hartree/Particle)  
Thermal correction to Energy= 0.334241  
Thermal correction to Enthalpy= 0.335185  
Thermal correction to Gibbs Free Energy= 0.256754  
Sum of electronic and zero-point Energies= -2681.289809  
Sum of electronic and thermal Energies= -2681.267511  
Sum of electronic and thermal Enthalpies= -2681.266566  
Sum of electronic and thermal Free Energies= -2681.344998  
Sum of electronic and thermal Free Energies(343k)= -2681.357262

## INT2

| Center<br>Number | Atomic<br>Number | Atomic<br>Type | Coordinates (Angstroms) |           |           |
|------------------|------------------|----------------|-------------------------|-----------|-----------|
|                  |                  |                | X                       | Y         | Z         |
| 1                | 6                | 0              | 2.846172                | -0.113614 | -0.891752 |
| 2                | 8                | 0              | 3.918896                | 0.421957  | -1.057205 |
| 3                | 8                | 0              | 2.611700                | -1.109866 | -0.026157 |
| 4                | 6                | 0              | 1.626906                | 0.320260  | -1.593234 |
| 5                | 6                | 0              | 3.735953                | -1.542530 | 0.761724  |
| 6                | 1                | 0              | 4.495289                | -1.960622 | 0.093713  |
| 7                | 1                | 0              | 4.167663                | -0.671642 | 1.261423  |
| 8                | 1                | 0              | 1.722544                | 0.125528  | -2.667970 |
| 9                | 29               | 0              | 0.190759                | 0.927269  | -0.767289 |
| 10               | 7                | 0              | -1.293669               | -0.297529 | -0.309984 |
| 11               | 6                | 0              | -1.740414               | -1.001791 | -1.538437 |
| 12               | 1                | 0              | -2.131972               | -0.248778 | -2.229356 |
| 13               | 1                | 0              | -0.857474               | -1.451162 | -2.000083 |
| 14               | 6                | 0              | -2.462028               | 0.374646  | 0.317802  |
| 15               | 1                | 0              | -2.100620               | 0.847693  | 1.232544  |
| 16               | 1                | 0              | -2.797879               | 1.165258  | -0.356791 |
| 17               | 6                | 0              | -0.756337               | -1.300110 | 0.649243  |
| 18               | 1                | 0              | -0.385446               | -0.748865 | 1.516481  |
| 19               | 1                | 0              | 0.101567                | -1.784492 | 0.176868  |
| 20               | 7                | 0              | -0.308233               | 2.768393  | 0.913815  |
| 21               | 8                | 0              | 0.264807                | 1.770262  | 1.420391  |
| 22               | 8                | 0              | -0.586369               | 2.674486  | -0.347126 |
| 23               | 8                | 0              | -0.609678               | 3.761289  | 1.535117  |
| 24               | 6                | 0              | -2.808905               | -2.067120 | -1.165888 |
| 25               | 1                | 0              | -3.740423               | -1.899431 | -1.715211 |
| 26               | 1                | 0              | -2.457458               | -3.074045 | -1.412292 |
| 27               | 6                | 0              | -3.566303               | -0.676767 | 0.608370  |
| 28               | 1                | 0              | -3.844088               | -0.665428 | 1.666816  |
| 29               | 1                | 0              | -4.471942               | -0.468704 | 0.029926  |
| 30               | 6                | 0              | -1.878961               | -2.307974 | 1.016840  |
| 31               | 1                | 0              | -1.571007               | -3.334930 | 0.795709  |

|    |   |   |           |           |          |
|----|---|---|-----------|-----------|----------|
| 32 | 1 | 0 | -2.115584 | -2.258831 | 2.084192 |
| 33 | 7 | 0 | -3.101497 | -2.020362 | 0.265084 |
| 34 | 6 | 0 | 3.220245  | -2.566204 | 1.749591 |
| 35 | 1 | 0 | 2.460883  | -2.123993 | 2.401173 |
| 36 | 1 | 0 | 2.781577  | -3.424352 | 1.231506 |
| 37 | 1 | 0 | 4.043343  | -2.925324 | 2.374612 |

-----  
Zero-point correction= 0.304342 (Hartree/Particle)  
Thermal correction to Energy= 0.324370  
Thermal correction to Enthalpy= 0.325314  
Thermal correction to Gibbs Free Energy= 0.251723  
Sum of electronic and zero-point Energies= -2571.835198  
Sum of electronic and thermal Energies= -2571.815170  
Sum of electronic and thermal Enthalpies= -2571.814226  
Sum of electronic and thermal Free Energies= -2571.887817  
Sum of electronic and thermal Free Energies(343k)= -2571.899314

## N2

| -----  |        |        |                         |          |           |
|--------|--------|--------|-------------------------|----------|-----------|
| Center | Atomic | Atomic | Coordinates (Angstroms) |          |           |
| Number | Number | Type   | X                       | Y        | Z         |
| -----  |        |        |                         |          |           |
| 1      | 7      | 0      | 0.000000                | 0.000000 | 0.550870  |
| 2      | 7      | 0      | 0.000000                | 0.000000 | -0.550870 |

-----  
Zero-point correction= 0.005708 (Hartree/Particle)  
Thermal correction to Energy= 0.008069  
Thermal correction to Enthalpy= 0.009013  
Thermal correction to Gibbs Free Energy= -0.012735  
Sum of electronic and zero-point Energies= -109.479340  
Sum of electronic and thermal Energies= -109.476980  
Sum of electronic and thermal Enthalpies= -109.476036  
Sum of electronic and thermal Free Energies= -109.497784  
Sum of electronic and thermal Free Energies(343k)= -109.501102

## INT3

| -----  |        |        |                         |           |           |
|--------|--------|--------|-------------------------|-----------|-----------|
| Center | Atomic | Atomic | Coordinates (Angstroms) |           |           |
| Number | Number | Type   | X                       | Y         | Z         |
| -----  |        |        |                         |           |           |
| 1      | 6      | 0      | -2.894883               | 0.800397  | -0.630632 |
| 2      | 8      | 0      | -3.127214               | 1.087295  | -1.775657 |
| 3      | 8      | 0      | -3.514234               | -0.132705 | 0.091108  |
| 4      | 6      | 0      | -1.806425               | 1.462595  | 0.151878  |
| 5      | 7      | 0      | -1.963207               | 1.414113  | 1.491840  |
| 6      | 7      | 0      | -2.022526               | 1.317311  | 2.601925  |
| 7      | 6      | 0      | -4.461040               | -0.962374 | -0.618266 |
| 8      | 1      | 0      | -5.238101               | -0.318957 | -1.039614 |
| 9      | 1      | 0      | -3.927429               | -1.452254 | -1.436804 |
| 10     | 1      | 0      | -1.564886               | 2.466806  | -0.184759 |
| 11     | 29     | 0      | 0.118684                | 0.471683  | -0.144214 |
| 12     | 7      | 0      | 1.941417                | -0.473300 | -0.108697 |
| 13     | 6      | 0      | 2.998173                | 0.370536  | -0.732434 |
| 14     | 1      | 0      | 2.733547                | 0.516714  | -1.782561 |
| 15     | 1      | 0      | 2.981130                | 1.341982  | -0.239245 |
| 16     | 6      | 0      | 1.945366                | -1.804577 | -0.774905 |
| 17     | 1      | 0      | 1.202011                | -2.427265 | -0.275796 |
| 18     | 1      | 0      | 1.622928                | -1.666607 | -1.809036 |
| 19     | 6      | 0      | 2.284988                | -0.668499 | 1.327837  |
| 20     | 1      | 0      | 1.480023                | -1.253491 | 1.778056  |
| 21     | 1      | 0      | 2.293471                | 0.318578  | 1.796175  |
| 22     | 7      | 0      | -1.178771               | -1.756824 | 0.003544  |
| 23     | 8      | 0      | -0.864201               | -1.355150 | 1.143417  |
| 24     | 8      | 0      | -0.813090               | -1.008740 | -0.994150 |
| 25     | 7      | 0      | 1.054355                | 2.857089  | -0.205268 |
| 26     | 8      | 0      | 0.696097                | 2.436293  | -1.327271 |
| 27     | 8      | 0      | 0.886365                | 2.023864  | 0.785595  |
| 28     | 8      | 0      | 1.533480                | 3.946466  | 0.000753  |
| 29     | 8      | 0      | -1.783021               | -2.784289 | -0.214631 |
| 30     | 6      | 0      | -5.006252               | -1.960454 | 0.377772  |
| 31     | 1      | 0      | -5.725764               | -2.616636 | -0.121031 |
| 32     | 1      | 0      | -4.195373               | -2.574127 | 0.778148  |
| 33     | 1      | 0      | -5.514256               | -1.453894 | 1.203826  |



|    |   |   |          |           |           |
|----|---|---|----------|-----------|-----------|
| 34 | 6 | 0 | 4.385114 | -0.306740 | -0.557365 |
| 35 | 1 | 0 | 4.864602 | -0.472695 | -1.526963 |
| 36 | 1 | 0 | 5.051943 | 0.326717  | 0.035644  |
| 37 | 6 | 0 | 3.661515 | -1.379977 | 1.441126  |
| 38 | 1 | 0 | 4.358333 | -0.784057 | 2.038482  |
| 39 | 1 | 0 | 3.557158 | -2.353583 | 1.929857  |
| 40 | 6 | 0 | 3.358648 | -2.439893 | -0.668565 |
| 41 | 1 | 0 | 3.302751 | -3.424726 | -0.194669 |
| 42 | 1 | 0 | 3.803072 | -2.576645 | -1.659322 |
| 43 | 7 | 0 | 4.249918 | -1.593395 | 0.119490  |

-----  
Zero-point correction= 0.333969 (Hartree/Particle)  
Thermal correction to Energy= 0.359537  
Thermal correction to Enthalpy= 0.360481  
Thermal correction to Gibbs Free Energy= 0.275732  
Sum of electronic and zero-point Energies= -2961.533778  
Sum of electronic and thermal Energies= -2961.508211  
Sum of electronic and thermal Enthalpies= -2961.507266  
Sum of electronic and thermal Free Energies= -2961.592016  
Sum of electronic and thermal Free Energies(343k)= -2961.605304

### Cu(NO<sub>3</sub>)<sub>2</sub>-DABCO

| Center<br>Number | Atomic<br>Number | Atomic<br>Type | Coordinates (Angstroms) |           |           |
|------------------|------------------|----------------|-------------------------|-----------|-----------|
|                  |                  |                | X                       | Y         | Z         |
| 1                | 29               | 0              | 0.962754                | -0.002528 | -0.156760 |
| 2                | 7                | 0              | -1.013286               | -0.148128 | -0.085753 |
| 3                | 6                | 0              | -1.436436               | -1.198768 | -1.051037 |
| 4                | 1                | 0              | -1.198823               | -0.832114 | -2.054742 |
| 5                | 1                | 0              | -0.833790               | -2.090882 | -0.862438 |
| 6                | 6                | 0              | -1.734806               | 1.115004  | -0.398484 |
| 7                | 1                | 0              | -1.449427               | 1.842202  | 0.365431  |
| 8                | 1                | 0              | -1.372254               | 1.483634  | -1.360196 |
| 9                | 6                | 0              | -1.388242               | -0.575513 | 1.291313  |
| 10               | 1                | 0              | -0.994213               | 0.173154  | 1.983822  |
| 11               | 1                | 0              | -0.882173               | -1.522696 | 1.492645  |
| 12               | 7                | 0              | 1.187697                | 2.460526  | 0.132394  |
| 13               | 8                | 0              | 1.095286                | 1.793198  | 1.197875  |
| 14               | 8                | 0              | 1.136784                | 1.758785  | -0.960774 |
| 15               | 7                | 0              | 2.529783                | -1.789180 | 0.055269  |
| 16               | 8                | 0              | 2.808834                | -0.680806 | -0.513454 |
| 17               | 8                | 0              | 1.310100                | -1.836151 | 0.479838  |
| 18               | 8                | 0              | 3.298823                | -2.694697 | 0.182077  |
| 19               | 8                | 0              | 1.298391                | 3.658263  | 0.088663  |
| 20               | 6                | 0              | -2.956636               | -1.469500 | -0.877761 |
| 21               | 1                | 0              | -3.478183               | -1.381755 | -1.835510 |
| 22               | 1                | 0              | -3.131071               | -2.480451 | -0.497265 |
| 23               | 6                | 0              | -2.932922               | -0.709495 | 1.379728  |
| 24               | 1                | 0              | -3.215588               | -1.696996 | 1.756632  |
| 25               | 1                | 0              | -3.351782               | 0.035877  | 2.062522  |
| 26               | 6                | 0              | -3.262860               | 0.841219  | -0.396846 |
| 27               | 1                | 0              | -3.782534               | 1.546755  | 0.258148  |
| 28               | 1                | 0              | -3.683265               | 0.955019  | -1.400776 |
| 29               | 7                | 0              | -3.541493               | -0.518195 | 0.064160  |

-----  
Zero-point correction= 0.224635 (Hartree/Particle)  
Thermal correction to Energy= 0.240643  
Thermal correction to Enthalpy= 0.241587  
Thermal correction to Gibbs Free Energy= 0.178307  
Sum of electronic and zero-point Energies= -2545.823829  
Sum of electronic and thermal Energies= -2545.807821  
Sum of electronic and thermal Enthalpies= -2545.806877  
Sum of electronic and thermal Free Energies= -2545.870157  
Sum of electronic and thermal Free Energies(343k)= -2545.880027

### TS2

| Center<br>Number | Atomic<br>Number | Atomic<br>Type | Coordinates (Angstroms) |          |           |
|------------------|------------------|----------------|-------------------------|----------|-----------|
|                  |                  |                | X                       | Y        | Z         |
| 1                | 6                | 0              | -2.861821               | 0.891724 | -0.497625 |
| 2                | 8                | 0              | -2.996771               | 1.322630 | -1.626141 |

|    |    |   |           |           |           |
|----|----|---|-----------|-----------|-----------|
| 3  | 8  | 0 | -3.574433 | -0.006224 | 0.130964  |
| 4  | 6  | 0 | -1.624229 | 1.408322  | 0.073608  |
| 5  | 7  | 0 | -1.853731 | 1.010533  | 2.197466  |
| 6  | 7  | 0 | -1.729610 | 0.612033  | 3.215163  |
| 7  | 6  | 0 | -4.582008 | -0.700441 | -0.656307 |
| 8  | 1  | 0 | -5.325560 | 0.031123  | -0.982865 |
| 9  | 1  | 0 | -4.080754 | -1.121391 | -1.530626 |
| 10 | 1  | 0 | -1.669459 | 2.476637  | 0.290940  |
| 11 | 29 | 0 | 0.133752  | 0.502829  | -0.188193 |
| 12 | 7  | 0 | 1.928841  | -0.477064 | -0.125294 |
| 13 | 6  | 0 | 3.008964  | 0.337606  | -0.747384 |
| 14 | 1  | 0 | 2.762485  | 0.465372  | -1.804408 |
| 15 | 1  | 0 | 2.996130  | 1.318978  | -0.274952 |
| 16 | 6  | 0 | 1.915408  | -1.818097 | -0.771588 |
| 17 | 1  | 0 | 1.161365  | -2.415784 | -0.258677 |
| 18 | 1  | 0 | 1.598366  | -1.691012 | -1.808453 |
| 19 | 6  | 0 | 2.251445  | -0.660561 | 1.317533  |
| 20 | 1  | 0 | 1.426322  | -1.218588 | 1.766374  |
| 21 | 1  | 0 | 2.283599  | 0.332733  | 1.771355  |
| 22 | 7  | 0 | -1.247799 | -1.748429 | -0.257121 |
| 23 | 8  | 0 | -0.882815 | -1.519027 | 0.914305  |
| 24 | 8  | 0 | -0.811431 | -0.944166 | -1.173633 |
| 25 | 7  | 0 | 1.087473  | 2.893709  | -0.234382 |
| 26 | 8  | 0 | 0.731023  | 2.452473  | -1.352265 |
| 27 | 8  | 0 | 0.980603  | 2.062841  | 0.759380  |
| 28 | 8  | 0 | 1.515384  | 4.009663  | -0.047844 |
| 29 | 8  | 0 | -1.975297 | -2.670651 | -0.571515 |
| 30 | 6  | 0 | -5.163267 | -1.773080 | 0.234082  |
| 31 | 1  | 0 | -5.923018 | -2.331328 | -0.320900 |
| 32 | 1  | 0 | -4.377578 | -2.466489 | 0.543557  |
| 33 | 1  | 0 | -5.632011 | -1.336990 | 1.120857  |
| 34 | 6  | 0 | 4.381218  | -0.357399 | -0.536187 |
| 35 | 1  | 0 | 4.880897  | -0.536175 | -1.493300 |
| 36 | 1  | 0 | 5.043392  | 0.269960  | 0.068654  |
| 37 | 6  | 0 | 3.607005  | -1.407161 | 1.456246  |
| 38 | 1  | 0 | 4.307980  | -0.827737 | 2.065027  |
| 39 | 1  | 0 | 3.470093  | -2.377272 | 1.944136  |
| 40 | 6  | 0 | 3.318029  | -2.472596 | -0.651905 |
| 41 | 1  | 0 | 3.244273  | -3.457108 | -0.179413 |
| 42 | 1  | 0 | 3.771436  | -2.614686 | -1.637938 |
| 43 | 7  | 0 | 4.213208  | -1.638280 | 0.145507  |

-----  
Zero-point correction= 0.329951 (Hartree/Particle)  
Thermal correction to Energy= 0.356360  
Thermal correction to Enthalpy= 0.357305  
Thermal correction to Gibbs Free Energy= 0.270508  
Sum of electronic and zero-point Energies= -2961.499841  
Sum of electronic and thermal Energies= -2961.473431  
Sum of electronic and thermal Enthalpies= -2961.472487  
Sum of electronic and thermal Free Energies= -2961.559284  
Sum of electronic and thermal Free Energies(343k)= -2961.572886

#### INT4

| Center<br>Number | Atomic<br>Number | Atomic<br>Type | Coordinates (Angstroms) |           |           |
|------------------|------------------|----------------|-------------------------|-----------|-----------|
|                  |                  |                | X                       | Y         | Z         |
| 1                | 6                | 0              | -2.927518               | 0.947033  | 0.264752  |
| 2                | 8                | 0              | -2.877939               | 1.717961  | -0.708619 |
| 3                | 8                | 0              | -3.740518               | 0.018043  | 0.591550  |
| 4                | 6                | 0              | -1.670789               | 1.448298  | 0.661427  |
| 5                | 6                | 0              | -4.702969               | -0.413068 | -0.433666 |
| 6                | 1                | 0              | -5.357031               | 0.433427  | -0.654930 |
| 7                | 1                | 0              | -4.116594               | -0.676601 | -1.316415 |
| 8                | 1                | 0              | -1.714001               | 2.373856  | 1.237557  |
| 9                | 29               | 0              | 0.031389                | 0.584749  | 0.088651  |
| 10               | 7                | 0              | 1.778668                | -0.473281 | -0.054334 |
| 11               | 6                | 0              | 2.832878                | 0.300931  | -0.765667 |
| 12               | 1                | 0              | 2.499741                | 0.440904  | -1.797100 |
| 13               | 1                | 0              | 2.901005                | 1.281296  | -0.295714 |
| 14               | 6                | 0              | 1.637369                | -1.797493 | -0.718737 |
| 15               | 1                | 0              | 0.926090                | -2.377006 | -0.129280 |
| 16               | 1                | 0              | 1.207640                | -1.636902 | -1.709351 |
| 17               | 6                | 0              | 2.230432                | -0.703564 | 1.346392  |

|    |   |   |           |           |           |
|----|---|---|-----------|-----------|-----------|
| 18 | 1 | 0 | 1.419137  | -1.213594 | 1.871897  |
| 19 | 1 | 0 | 2.374860  | 0.277687  | 1.804481  |
| 20 | 7 | 0 | -1.444847 | -1.640965 | -0.047489 |
| 21 | 8 | 0 | -0.985893 | -1.538207 | 1.105191  |
| 22 | 8 | 0 | -1.067722 | -0.754185 | -0.914504 |
| 23 | 7 | 0 | 1.062622  | 2.927255  | -0.049229 |
| 24 | 8 | 0 | 0.587124  | 2.500500  | -1.127025 |
| 25 | 8 | 0 | 1.033204  | 2.095761  | 0.949259  |
| 26 | 8 | 0 | 1.540454  | 4.029615  | 0.094836  |
| 27 | 8 | 0 | -2.222905 | -2.512174 | -0.395160 |
| 28 | 6 | 0 | -5.435825 | -1.599971 | 0.139222  |
| 29 | 1 | 0 | -6.148335 | -1.970135 | -0.603750 |
| 30 | 1 | 0 | -4.725351 | -2.396382 | 0.371589  |
| 31 | 1 | 0 | -5.986215 | -1.325936 | 1.043285  |
| 32 | 6 | 0 | 4.188592  | -0.449997 | -0.673393 |
| 33 | 1 | 0 | 4.617993  | -0.607905 | -1.667721 |
| 34 | 1 | 0 | 4.912467  | 0.129304  | -0.091632 |
| 35 | 6 | 0 | 3.537697  | -1.542714 | 1.338624  |
| 36 | 1 | 0 | 4.324530  | -1.040376 | 1.910049  |
| 37 | 1 | 0 | 3.375571  | -2.524472 | 1.794676  |
| 38 | 6 | 0 | 3.016209  | -2.506986 | -0.774719 |
| 39 | 1 | 0 | 2.947939  | -3.513162 | -0.349291 |
| 40 | 1 | 0 | 3.366577  | -2.609429 | -1.806691 |
| 41 | 7 | 0 | 4.017960  | -1.749526 | -0.027830 |

-----  
Zero-point correction= 0.322091 (Hartree/Particle)  
Thermal correction to Energy= 0.346116  
Thermal correction to Enthalpy= 0.347060  
Thermal correction to Gibbs Free Energy= 0.265342  
Sum of electronic and zero-point Energies= -2852.017251  
Sum of electronic and thermal Energies= -2851.993226  
Sum of electronic and thermal Enthalpies= -2851.992282  
Sum of electronic and thermal Free Energies= -2852.074000  
Sum of electronic and thermal Free Energies(343k)= -2852.089076

#### INT5

| Center<br>Number | Atomic<br>Number | Atomic<br>Type | Coordinates (Angstroms) |           |           |
|------------------|------------------|----------------|-------------------------|-----------|-----------|
|                  |                  |                | X                       | Y         | Z         |
| 1                | 6                | 0              | -1.328493               | 2.227717  | -0.379040 |
| 2                | 8                | 0              | -2.464944               | 2.556503  | -0.123110 |
| 3                | 8                | 0              | -0.234654               | 2.927745  | -0.046131 |
| 4                | 6                | 0              | -0.990969               | 0.964137  | -1.052588 |
| 5                | 6                | 0              | -0.464982               | 4.162972  | 0.657698  |
| 6                | 1                | 0              | -1.105954               | 4.804332  | 0.045732  |
| 7                | 1                | 0              | -0.996303               | 3.941331  | 1.587192  |
| 8                | 1                | 0              | -1.264552               | 1.002670  | -2.113643 |
| 9                | 29               | 0              | -0.145399               | -0.384626 | -0.291643 |
| 10               | 7                | 0              | 1.814418                | -0.587862 | -0.351790 |
| 11               | 6                | 0              | 2.264067                | -0.547767 | -1.767226 |
| 12               | 1                | 0              | 1.827153                | -1.411364 | -2.277816 |
| 13               | 1                | 0              | 1.845263                | 0.354444  | -2.220221 |
| 14               | 6                | 0              | 2.318956                | -1.833747 | 0.283512  |
| 15               | 1                | 0              | 1.993962                | -1.812215 | 1.325710  |
| 16               | 1                | 0              | 1.827808                | -2.681403 | -0.200064 |
| 17               | 6                | 0              | 2.393182                | 0.577366  | 0.370553  |
| 18               | 1                | 0              | 2.004127                | 0.547948  | 1.391219  |
| 19               | 1                | 0              | 2.008551                | 1.484308  | -0.102950 |
| 20               | 7                | 0              | -0.667849               | -1.803905 | 1.791616  |
| 21               | 8                | 0              | -0.202028               | -0.677736 | 2.077905  |
| 22               | 8                | 0              | -0.719151               | -2.081435 | 0.520110  |
| 23               | 8                | 0              | -1.049610               | -2.613314 | 2.602936  |
| 24               | 6                | 0              | 3.816618                | -0.559966 | -1.817400 |
| 25               | 1                | 0              | 4.183625                | -1.403832 | -2.409647 |
| 26               | 1                | 0              | 4.199906                | 0.356245  | -2.277420 |
| 27               | 6                | 0              | 3.865546                | -1.885114 | 0.157490  |
| 28               | 1                | 0              | 4.333748                | -1.990935 | 1.140857  |
| 29               | 1                | 0              | 4.182798                | -2.738594 | -0.449913 |
| 30               | 6                | 0              | 3.942677                | 0.491259  | 0.319749  |
| 31               | 1                | 0              | 4.369960                | 1.393675  | -0.128742 |
| 32               | 1                | 0              | 4.364676                | 0.392245  | 1.324651  |
| 33               | 7                | 0              | 4.371227                | -0.664340 | -0.469485 |
| 34               | 6                | 0              | 0.888084                | 4.790915  | 0.912153  |

|    |   |   |           |           |           |
|----|---|---|-----------|-----------|-----------|
| 35 | 1 | 0 | 1.510511  | 4.136326  | 1.529530  |
| 36 | 1 | 0 | 1.409440  | 4.984777  | -0.029900 |
| 37 | 1 | 0 | 0.761425  | 5.741968  | 1.437903  |
| 38 | 6 | 0 | -3.781339 | -0.779141 | -0.817168 |
| 39 | 1 | 0 | -3.308678 | 0.130375  | -1.229296 |
| 40 | 6 | 0 | -5.153684 | -0.931994 | -1.457036 |
| 41 | 1 | 0 | -5.757107 | -0.031591 | -1.301055 |
| 42 | 1 | 0 | -5.049791 | -1.102369 | -2.532921 |
| 43 | 1 | 0 | -5.677685 | -1.790946 | -1.023909 |
| 44 | 6 | 0 | -3.861965 | -0.603661 | 0.694864  |
| 45 | 1 | 0 | -4.246629 | -1.515707 | 1.165375  |
| 46 | 1 | 0 | -2.876868 | -0.377767 | 1.118016  |
| 47 | 1 | 0 | -4.520451 | 0.231652  | 0.951004  |
| 48 | 8 | 0 | -3.014815 | -1.914523 | -1.183995 |
| 49 | 1 | 0 | -2.391502 | -2.114476 | -0.469534 |

-----

Zero-point correction= 0.416301 (Hartree/Particle)  
 Thermal correction to Energy= 0.443131  
 Thermal correction to Enthalpy= 0.444075  
 Thermal correction to Gibbs Free Energy= 0.354834  
 Sum of electronic and zero-point Energies= -2766.034258  
 Sum of electronic and thermal Energies= -2766.007428  
 Sum of electronic and thermal Enthalpies= -2766.006484  
 Sum of electronic and thermal Free Energies= -2766.095725  
 Sum of electronic and thermal Free Energies(343k)= -2766.107516

### TS3

-----

| Center<br>Number | Atomic<br>Number | Atomic<br>Type | Coordinates (Angstroms) |           |           |
|------------------|------------------|----------------|-------------------------|-----------|-----------|
|                  |                  |                | X                       | Y         | Z         |
| 1                | 6                | 0              | -1.465788               | 2.132654  | -0.047610 |
| 2                | 8                | 0              | -2.521975               | 2.445232  | 0.451285  |
| 3                | 8                | 0              | -0.340675               | 2.869380  | 0.047731  |
| 4                | 6                | 0              | -1.170775               | 0.904769  | -0.823577 |
| 5                | 6                | 0              | -0.457930               | 4.104916  | 0.774921  |
| 6                | 1                | 0              | -1.124151               | 4.774745  | 0.222592  |
| 7                | 1                | 0              | -0.915442               | 3.902052  | 1.746638  |
| 8                | 1                | 0              | -1.368153               | 1.075653  | -1.891143 |
| 9                | 29               | 0              | -0.178692               | -0.472662 | -0.286536 |
| 10               | 7                | 0              | 1.797567                | -0.491895 | -0.332726 |
| 11               | 6                | 0              | 2.251780                | 0.009511  | -1.653921 |
| 12               | 1                | 0              | 1.890012                | -0.687616 | -2.416088 |
| 13               | 1                | 0              | 1.763533                | 0.972966  | -1.822195 |
| 14               | 6                | 0              | 2.409043                | -1.820146 | -0.078238 |
| 15               | 1                | 0              | 2.062680                | -2.149328 | 0.903826  |
| 16               | 1                | 0              | 2.014113                | -2.519066 | -0.820247 |
| 17               | 6                | 0              | 2.257693                | 0.452470  | 0.718775  |
| 18               | 1                | 0              | 1.876438                | 0.082109  | 1.673627  |
| 19               | 1                | 0              | 1.783841                | 1.417917  | 0.520218  |
| 20               | 7                | 0              | -0.630396               | -2.444488 | 1.315001  |
| 21               | 8                | 0              | -0.215108               | -1.405684 | 1.881997  |
| 22               | 8                | 0              | -0.716088               | -2.377434 | 0.021185  |
| 23               | 8                | 0              | -0.938743               | -3.458778 | 1.897014  |
| 24               | 6                | 0              | 3.800564                | 0.129398  | -1.658906 |
| 25               | 1                | 0              | 4.241347                | -0.484114 | -2.450948 |
| 26               | 1                | 0              | 4.111278                | 1.164492  | -1.832892 |
| 27               | 6                | 0              | 3.956037                | -1.695395 | -0.138257 |
| 28               | 1                | 0              | 4.411808                | -2.028424 | 0.799279  |
| 29               | 1                | 0              | 4.370598                | -2.312429 | -0.941701 |
| 30               | 6                | 0              | 3.808054                | 0.535253  | 0.690456  |
| 31               | 1                | 0              | 4.143385                | 1.563686  | 0.521555  |
| 32               | 1                | 0              | 4.237516                | 0.201332  | 1.640171  |
| 33               | 7                | 0              | 4.350986                | -0.306912 | -0.376843 |
| 34               | 6                | 0              | 0.934727                | 4.681649  | 0.911724  |
| 35               | 1                | 0              | 1.579039                | 4.010039  | 1.487447  |
| 36               | 1                | 0              | 1.388168                | 4.845326  | -0.070320 |
| 37               | 1                | 0              | 0.887636                | 5.641906  | 1.434094  |
| 38               | 6                | 0              | -3.601595               | -0.519565 | -0.683767 |
| 39               | 1                | 0              | -2.789030               | 0.271896  | -0.772949 |
| 40               | 6                | 0              | -4.813795               | 0.016595  | -1.419539 |
| 41               | 1                | 0              | -5.098702               | 0.991652  | -1.014507 |
| 42               | 1                | 0              | -4.595159               | 0.122119  | -2.486085 |
| 43               | 1                | 0              | -5.654903               | -0.676670 | -1.309045 |

|    |   |   |           |           |           |
|----|---|---|-----------|-----------|-----------|
| 44 | 6 | 0 | -3.817425 | -0.703345 | 0.810204  |
| 45 | 1 | 0 | -4.552103 | -1.496435 | 0.986896  |
| 46 | 1 | 0 | -2.882254 | -0.975441 | 1.311179  |
| 47 | 1 | 0 | -4.172448 | 0.227542  | 1.259576  |
| 48 | 8 | 0 | -3.156822 | -1.671884 | -1.329585 |
| 49 | 1 | 0 | -2.482305 | -2.104901 | -0.778053 |

-----

Zero-point correction= 0.415193 (Hartree/Particle)  
Thermal correction to Energy= 0.440959  
Thermal correction to Enthalpy= 0.441903  
Thermal correction to Gibbs Free Energy= 0.356038  
Sum of electronic and zero-point Energies= -2766.033865  
Sum of electronic and thermal Energies= -2766.008099  
Sum of electronic and thermal Enthalpies= -2766.007154  
Sum of electronic and thermal Free Energies= -2766.093019  
Sum of electronic and thermal Free Energies(343k)= -2766.106220

## INT6

| Center<br>Number | Atomic<br>Number | Atomic<br>Type | Coordinates (Angstroms) |           |           |
|------------------|------------------|----------------|-------------------------|-----------|-----------|
|                  |                  |                | X                       | Y         | Z         |
| 1                | 6                | 0              | 1.951913                | 1.522051  | 0.608066  |
| 2                | 8                | 0              | 2.606489                | 1.471409  | -0.428885 |
| 3                | 8                | 0              | 1.453796                | 2.715960  | 1.043868  |
| 4                | 6                | 0              | 1.567258                | 0.403476  | 1.457422  |
| 5                | 6                | 0              | 1.687789                | 3.834661  | 0.196664  |
| 6                | 1                | 0              | 2.764238                | 3.972293  | 0.051683  |
| 7                | 1                | 0              | 1.249907                | 3.647034  | -0.791349 |
| 8                | 1                | 0              | 1.418963                | 0.712584  | 2.495253  |
| 9                | 29               | 0              | -0.095117               | 0.017801  | 0.629653  |
| 10               | 7                | 0              | -1.872229               | 0.077296  | -0.087742 |
| 11               | 6                | 0              | -2.352500               | 1.483130  | -0.060229 |
| 12               | 1                | 0              | -2.233040               | 1.857427  | 0.959915  |
| 13               | 1                | 0              | -1.689800               | 2.071416  | -0.701829 |
| 14               | 6                | 0              | -2.771742               | -0.748109 | 0.763028  |
| 15               | 1                | 0              | -2.361559               | -1.759387 | 0.793843  |
| 16               | 1                | 0              | -2.722831               | -0.340683 | 1.777169  |
| 17               | 6                | 0              | -1.943115               | -0.423550 | -1.483266 |
| 18               | 1                | 0              | -1.593107               | -1.458248 | -1.474822 |
| 19               | 1                | 0              | -1.239356               | 0.161454  | -2.083429 |
| 20               | 7                | 0              | 0.389481                | -2.986833 | 1.115984  |
| 21               | 8                | 0              | -0.294122               | -3.461378 | 1.987318  |
| 22               | 8                | 0              | 1.699276                | -3.234212 | 1.184725  |
| 23               | 8                | 0              | 0.001340                | -2.273232 | 0.192176  |
| 24               | 6                | 0              | -3.828902               | 1.534519  | -0.540107 |
| 25               | 1                | 0              | -4.490771               | 1.885042  | 0.258263  |
| 26               | 1                | 0              | -3.943407               | 2.221080  | -1.385163 |
| 27               | 6                | 0              | -4.213025               | -0.702176 | 0.189325  |
| 28               | 1                | 0              | -4.535900               | -1.693938 | -0.142949 |
| 29               | 1                | 0              | -4.927656               | -0.361113 | 0.945012  |
| 30               | 6                | 0              | -3.397336               | -0.291628 | -2.009876 |
| 31               | 1                | 0              | -3.448424               | 0.403010  | -2.854631 |
| 32               | 1                | 0              | -3.780596               | -1.257112 | -2.355316 |
| 33               | 7                | 0              | -4.281243               | 0.206730  | -0.956227 |
| 34               | 6                | 0              | 1.056606                | 5.042879  | 0.859854  |
| 35               | 1                | 0              | -0.019268               | 4.893432  | 0.994852  |
| 36               | 1                | 0              | 1.502949                | 5.218485  | 1.843008  |
| 37               | 1                | 0              | 1.209164                | 5.935845  | 0.245073  |
| 38               | 6                | 0              | 3.058531                | -1.233838 | -1.467060 |
| 39               | 1                | 0              | 2.308665                | -0.395076 | 1.387891  |
| 40               | 6                | 0              | 4.246587                | -0.592540 | -2.116309 |
| 41               | 1                | 0              | 4.199630                | 0.475455  | -1.878412 |
| 42               | 1                | 0              | 5.172377                | -1.024858 | -1.734494 |
| 43               | 1                | 0              | 4.191510                | -0.700780 | -3.205266 |
| 44               | 6                | 0              | 1.688401                | -0.885422 | -1.979974 |
| 45               | 1                | 0              | 1.240257                | -1.773702 | -2.439025 |
| 46               | 1                | 0              | 1.068079                | -0.611081 | -1.121535 |
| 47               | 1                | 0              | 1.713523                | -0.061765 | -2.694326 |
| 48               | 8                | 0              | 3.209078                | -2.037713 | -0.552436 |
| 49               | 1                | 0              | 2.143151                | -2.720799 | 0.427178  |

-----

Zero-point correction= 0.416229 (Hartree/Particle)  
Thermal correction to Energy= 0.442817

Thermal correction to Enthalpy= 0.443761  
 Thermal correction to Gibbs Free Energy= 0.355785  
 Sum of electronic and zero-point Energies= -2766.080307  
 Sum of electronic and thermal Energies= -2766.053719  
 Sum of electronic and thermal Enthalpies= -2766.052775  
 Sum of electronic and thermal Free Energies= -2766.140752  
 Sum of electronic and thermal Free Energies(343k)= -2766.154544

### INT7

| Center Number | Atomic Number | Atomic Type | Coordinates (Angstroms) |           |           |
|---------------|---------------|-------------|-------------------------|-----------|-----------|
|               |               |             | X                       | Y         | Z         |
| 1             | 6             | 0           | -2.203791               | -0.644498 | 0.608927  |
| 2             | 8             | 0           | -1.688946               | -0.164534 | 1.621593  |
| 3             | 8             | 0           | -3.028388               | 0.110362  | -0.169049 |
| 4             | 6             | 0           | -2.004944               | -1.989244 | 0.075385  |
| 5             | 6             | 0           | -3.176514               | 1.475813  | 0.205219  |
| 6             | 1             | 0           | -3.458295               | 1.542334  | 1.260221  |
| 7             | 1             | 0           | -2.216132               | 1.995036  | 0.090997  |
| 8             | 1             | 0           | -2.748773               | -2.282077 | -0.662955 |
| 9             | 29            | 0           | -0.310298               | -1.339883 | -0.423814 |
| 10            | 7             | 0           | 1.280304                | -0.313816 | -0.285851 |
| 11            | 6             | 0           | 0.839497                | 1.108892  | -0.294290 |
| 12            | 1             | 0           | 0.389542                | 1.316374  | -1.269801 |
| 13            | 1             | 0           | 0.057899                | 1.197669  | 0.464769  |
| 14            | 6             | 0           | 2.375140                | -0.490904 | -1.267931 |
| 15            | 1             | 0           | 2.637639                | -1.552372 | -1.287756 |
| 16            | 1             | 0           | 1.976934                | -0.231685 | -2.253193 |
| 17            | 6             | 0           | 1.789737                | -0.626459 | 1.079820  |
| 18            | 1             | 0           | 2.121018                | -1.669311 | 1.075709  |
| 19            | 1             | 0           | 0.939194                | -0.544893 | 1.762381  |
| 20            | 6             | 0           | 2.055895                | 2.027218  | -0.005596 |
| 21            | 1             | 0           | 2.287689                | 2.662515  | -0.866702 |
| 22            | 1             | 0           | 1.853345                | 2.686229  | 0.844350  |
| 23            | 6             | 0           | 3.578173                | 0.406415  | -0.864460 |
| 24            | 1             | 0           | 4.454738                | -0.199644 | -0.613606 |
| 25            | 1             | 0           | 3.863852                | 1.072658  | -1.684755 |
| 26            | 6             | 0           | 2.943767                | 0.348349  | 1.434097  |
| 27            | 1             | 0           | 2.676937                | 0.975543  | 2.290350  |
| 28            | 1             | 0           | 3.854897                | -0.198268 | 1.697613  |
| 29            | 7             | 0           | 3.241496                | 1.224975  | 0.300253  |
| 30            | 6             | 0           | -4.232010               | 2.079291  | -0.699698 |
| 31            | 1             | 0           | -3.937935               | 1.992809  | -1.750098 |
| 32            | 1             | 0           | -5.188825               | 1.565409  | -0.569391 |
| 33            | 1             | 0           | -4.372675               | 3.139084  | -0.463603 |
| 34            | 1             | 0           | -1.896039               | -2.724788 | 0.876085  |

Zero-point correction= 0.299546 (Hartree/Particle)  
 Thermal correction to Energy= 0.315151  
 Thermal correction to Enthalpy= 0.316096  
 Thermal correction to Gibbs Free Energy= 0.254508  
 Sum of electronic and zero-point Energies= -2292.258400  
 Sum of electronic and thermal Energies= -2292.242794  
 Sum of electronic and thermal Enthalpies= -2292.241850  
 Sum of electronic and thermal Free Energies= -2292.303438  
 Sum of electronic and thermal Free Energies(343k)= -2292.313055

### HNO3+acetone

| Center Number | Atomic Number | Atomic Type | Coordinates (Angstroms) |           |           |
|---------------|---------------|-------------|-------------------------|-----------|-----------|
|               |               |             | X                       | Y         | Z         |
| 1             | 7             | 0           | -2.018122               | 0.043028  | -0.159515 |
| 2             | 8             | 0           | -3.189139               | 0.228597  | 0.040293  |
| 3             | 8             | 0           | -1.449405               | -0.915251 | 0.619504  |
| 4             | 8             | 0           | -1.294529               | 0.607818  | -0.959743 |
| 5             | 6             | 0           | 1.840604                | -0.099305 | 0.089157  |
| 6             | 6             | 0           | 3.251047                | -0.081685 | -0.436248 |
| 7             | 1             | 0           | 3.952984                | -0.028989 | 0.404419  |
| 8             | 1             | 0           | 3.449297                | -0.980135 | -1.021722 |
| 9             | 1             | 0           | 3.415551                | 0.813145  | -1.046579 |
| 10            | 6             | 0           | 1.335614                | 1.149680  | 0.765528  |

|    |   |   |           |           |           |
|----|---|---|-----------|-----------|-----------|
| 11 | 1 | 0 | 0.910488  | 1.805957  | -0.002799 |
| 12 | 1 | 0 | 0.543252  | 0.909083  | 1.477271  |
| 13 | 1 | 0 | 2.142365  | 1.690031  | 1.268001  |
| 14 | 8 | 0 | 1.138488  | -1.089548 | -0.049281 |
| 15 | 1 | 0 | -0.493987 | -0.975361 | 0.321207  |

-----

Zero-point correction= 0.114326 (Hartree/Particle)  
Thermal correction to Energy= 0.124321  
Thermal correction to Enthalpy= 0.125265  
Thermal correction to Gibbs Free Energy= 0.076828  
Sum of electronic and zero-point Energies= -473.791502  
Sum of electronic and thermal Energies= -473.781507  
Sum of electronic and thermal Enthalpies= -473.780563  
Sum of electronic and thermal Free Energies= -473.829001  
Sum of electronic and thermal Free Energies(343k)= -473.836489

## INT8

| Center<br>Number | Atomic<br>Number | Atomic<br>Type | Coordinates (Angstroms) |           |           |
|------------------|------------------|----------------|-------------------------|-----------|-----------|
|                  |                  |                | X                       | Y         | Z         |
| 1                | 6                | 0              | 1.873176                | 2.236551  | -0.884715 |
| 2                | 8                | 0              | 2.168381                | 3.410102  | -0.904527 |
| 3                | 8                | 0              | 2.727686                | 1.244697  | -0.569657 |
| 4                | 6                | 0              | 0.519261                | 1.738244  | -1.166217 |
| 5                | 6                | 0              | 4.066538                | 1.646557  | -0.233984 |
| 6                | 1                | 0              | 4.514869                | 2.142303  | -1.100493 |
| 7                | 1                | 0              | 4.022266                | 2.370560  | 0.583509  |
| 8                | 1                | 0              | 0.290126                | 1.933047  | -2.223255 |
| 9                | 29               | 0              | -0.405131               | 0.671863  | -0.096705 |
| 10               | 7                | 0              | 0.115478                | -1.233025 | -0.097179 |
| 11               | 6                | 0              | 0.629786                | -1.630472 | -1.434521 |
| 12               | 1                | 0              | -0.142495               | -1.387381 | -2.168480 |
| 13               | 1                | 0              | 1.506966                | -1.009786 | -1.636218 |
| 14               | 6                | 0              | -1.018444               | -2.126510 | 0.252971  |
| 15               | 1                | 0              | -1.468508               | -1.748749 | 1.173060  |
| 16               | 1                | 0              | -1.758986               | -2.023070 | -0.542861 |
| 17               | 6                | 0              | 1.200762                | -1.417475 | 0.904025  |
| 18               | 1                | 0              | 0.782570                | -1.182027 | 1.884296  |
| 19               | 1                | 0              | 1.971603                | -0.674494 | 0.691941  |
| 20               | 7                | 0              | -1.071904               | 1.017845  | 2.429034  |
| 21               | 8                | 0              | 0.157125                | 1.175735  | 2.325374  |
| 22               | 8                | 0              | -1.710900               | 0.681110  | 1.342939  |
| 23               | 8                | 0              | -1.695900               | 1.144580  | 3.461691  |
| 24               | 6                | 0              | 0.977218                | -3.143279 | -1.424102 |
| 25               | 1                | 0              | 0.290029                | -3.711938 | -2.059025 |
| 26               | 1                | 0              | 1.990150                | -3.311599 | -1.803907 |
| 27               | 6                | 0              | -0.498069               | -3.581927 | 0.389614  |
| 28               | 1                | 0              | -0.538148               | -3.918285 | 1.430494  |
| 29               | 1                | 0              | -1.110378               | -4.270282 | -0.201736 |
| 30               | 6                | 0              | 1.733458                | -2.870919 | 0.816103  |
| 31               | 1                | 0              | 2.754420                | -2.891596 | 0.420284  |
| 32               | 1                | 0              | 1.755088                | -3.339238 | 1.805007  |
| 33               | 7                | 0              | 0.889570                | -3.679500 | -0.066196 |
| 34               | 6                | 0              | 4.825569                | 0.396066  | 0.156057  |
| 35               | 1                | 0              | 4.386644                | -0.064060 | 1.046563  |
| 36               | 1                | 0              | 4.815481                | -0.335514 | -0.657922 |
| 37               | 1                | 0              | 5.866836                | 0.647042  | 0.379412  |
| 38               | 6                | 0              | -4.165269               | -0.417177 | -0.511117 |
| 39               | 1                | 0              | -5.228994               | -0.220800 | -0.345131 |
| 40               | 1                | 0              | -4.063812               | -1.430952 | -0.911668 |
| 41               | 1                | 0              | -3.644725               | -0.349088 | 0.448444  |
| 42               | 6                | 0              | -3.598721               | 0.600527  | -1.483982 |
| 43               | 1                | 0              | -4.126534               | 0.513383  | -2.444999 |
| 44               | 6                | 0              | -3.707997               | 2.028486  | -0.965662 |
| 45               | 1                | 0              | -3.258511               | 2.740543  | -1.668557 |
| 46               | 1                | 0              | -4.758745               | 2.307113  | -0.834750 |
| 47               | 1                | 0              | -3.197977               | 2.116124  | -0.001964 |
| 48               | 8                | 0              | -2.218840               | 0.250752  | -1.710398 |
| 49               | 1                | 0              | -1.876486               | 0.869637  | -2.367427 |

-----

Zero-point correction= 0.416571 (Hartree/Particle)

Thermal correction to Energy= 0.443195  
 Thermal correction to Enthalpy= 0.444139  
 Thermal correction to Gibbs Free Energy= 0.356739  
 Sum of electronic and zero-point Energies= -2766.039039  
 Sum of electronic and thermal Energies= -2766.012415  
 Sum of electronic and thermal Enthalpies= -2766.011471  
 Sum of electronic and thermal Free Energies= -2766.098871  
 Sum of electronic and thermal Free Energies(343k)= -2766.11258

#### TS4

| Center<br>Number | Atomic<br>Number | Atomic<br>Type | Coordinates (Angstroms) |           |           |
|------------------|------------------|----------------|-------------------------|-----------|-----------|
|                  |                  |                | X                       | Y         | Z         |
| 1                | 6                | 0              | 0.218416                | 2.455285  | -0.959212 |
| 2                | 8                | 0              | 0.495132                | 3.450501  | -1.599257 |
| 3                | 8                | 0              | 0.529810                | 2.314955  | 0.358971  |
| 4                | 6                | 0              | -0.545006               | 1.329379  | -1.457955 |
| 5                | 6                | 0              | 1.091208                | 3.456143  | 1.016395  |
| 6                | 1                | 0              | 1.933124                | 3.835032  | 0.428946  |
| 7                | 1                | 0              | 0.332258                | 4.243455  | 1.057476  |
| 8                | 1                | 0              | -0.225804               | 0.990914  | -2.446299 |
| 9                | 29               | 0              | -0.605305               | -0.113322 | -0.190499 |
| 10               | 7                | 0              | 1.241580                | -0.686427 | -0.461890 |
| 11               | 6                | 0              | 2.207279                | 0.104793  | -1.283286 |
| 12               | 1                | 0              | 1.753330                | 0.311552  | -2.251302 |
| 13               | 1                | 0              | 2.357796                | 1.054681  | -0.769707 |
| 14               | 6                | 0              | 1.131702                | -2.049171 | -1.069484 |
| 15               | 1                | 0              | 0.350434                | -2.598635 | -0.542432 |
| 16               | 1                | 0              | 0.821273                | -1.909278 | -2.109770 |
| 17               | 6                | 0              | 1.825575                | -0.825711 | 0.911255  |
| 18               | 1                | 0              | 1.181592                | -1.510795 | 1.460062  |
| 19               | 1                | 0              | 1.768552                | 0.153745  | 1.388758  |
| 20               | 7                | 0              | -1.272518               | -1.073190 | 2.107404  |
| 21               | 8                | 0              | -0.889444               | 0.111285  | 2.172614  |
| 22               | 8                | 0              | -1.066218               | -1.667345 | 0.965205  |
| 23               | 8                | 0              | -1.791645               | -1.682899 | 3.015229  |
| 24               | 6                | 0              | 3.531261                | -0.688011 | -1.440624 |
| 25               | 1                | 0              | 3.651218                | -1.047086 | -2.467658 |
| 26               | 1                | 0              | 4.389103                | -0.047273 | -1.214942 |
| 27               | 6                | 0              | 2.503119                | -2.770766 | -0.961325 |
| 28               | 1                | 0              | 2.453932                | -3.578920 | -0.225534 |
| 29               | 1                | 0              | 2.780483                | -3.214551 | -1.922274 |
| 30               | 6                | 0              | 3.270313                | -1.373700 | 0.808529  |
| 31               | 1                | 0              | 4.005505                | -0.603251 | 1.060774  |
| 32               | 1                | 0              | 3.410807                | -2.202566 | 1.508728  |
| 33               | 7                | 0              | 3.551739                | -1.841463 | -0.547674 |
| 34               | 6                | 0              | 1.512042                | 3.014565  | 2.402641  |
| 35               | 1                | 0              | 0.669936                | 2.562458  | 2.933487  |
| 36               | 1                | 0              | 2.322231                | 2.279154  | 2.350334  |
| 37               | 1                | 0              | 1.872552                | 3.874190  | 2.975944  |
| 38               | 6                | 0              | -4.089231               | -1.399921 | -0.082386 |
| 39               | 1                | 0              | -4.761057               | -2.091747 | -0.602052 |
| 40               | 1                | 0              | -3.386008               | -1.978409 | 0.520008  |
| 41               | 1                | 0              | -4.686554               | -0.770130 | 0.584810  |
| 42               | 6                | 0              | -3.357778               | -0.530668 | -1.090833 |
| 43               | 1                | 0              | -2.753385               | -1.170199 | -1.753624 |
| 44               | 6                | 0              | -4.307518               | 0.303320  | -1.940629 |
| 45               | 1                | 0              | -3.755102               | 0.920349  | -2.656759 |
| 46               | 1                | 0              | -4.989863               | -0.346572 | -2.498246 |
| 47               | 1                | 0              | -4.900586               | 0.963439  | -1.299526 |
| 48               | 8                | 0              | -2.481316               | 0.364362  | -0.381143 |
| 49               | 1                | 0              | -2.006387               | 1.094241  | -1.041056 |

Zero-point correction= 0.414229 (Hartree/Particle)  
 Thermal correction to Energy= 0.439321  
 Thermal correction to Enthalpy= 0.440265  
 Thermal correction to Gibbs Free Energy= 0.357202  
 Sum of electronic and zero-point Energies= -2766.022606  
 Sum of electronic and thermal Energies= -2765.997514  
 Sum of electronic and thermal Enthalpies= -2765.996570  
 Sum of electronic and thermal Free Energies= -2766.079633  
 Sum of electronic and thermal Free Energies(343k)= -2766.092672



## INT9

| Center<br>Number | Atomic<br>Number | Atomic<br>Type | Coordinates (Angstroms) |           |           |
|------------------|------------------|----------------|-------------------------|-----------|-----------|
|                  |                  |                | X                       | Y         | Z         |
| 1                | 6                | 0              | -0.926332               | 1.739383  | -1.366062 |
| 2                | 8                | 0              | -0.042887               | 2.576835  | -1.282822 |
| 3                | 8                | 0              | -2.178755               | 1.947626  | -0.975368 |
| 4                | 6                | 0              | -0.729359               | 0.342573  | -1.852065 |
| 5                | 6                | 0              | -2.441516               | 3.168316  | -0.263129 |
| 6                | 1                | 0              | -1.637751               | 3.329213  | 0.459328  |
| 7                | 1                | 0              | -2.434128               | 3.996683  | -0.978966 |
| 8                | 1                | 0              | 0.090298                | 0.265417  | -2.560976 |
| 9                | 29               | 0              | -0.290257               | -0.504319 | -0.191336 |
| 10               | 7                | 0              | 1.655639                | -0.029244 | -0.150904 |
| 11               | 6                | 0              | 2.295188                | 0.434566  | -1.417265 |
| 12               | 1                | 0              | 2.078951                | -0.309373 | -2.188995 |
| 13               | 1                | 0              | 1.817955                | 1.376792  | -1.689750 |
| 14               | 6                | 0              | 2.338625                | -1.295516 | 0.257428  |
| 15               | 1                | 0              | 1.831625                | -1.687381 | 1.138728  |
| 16               | 1                | 0              | 2.211763                | -2.011387 | -0.561803 |
| 17               | 6                | 0              | 1.892474                | 1.004930  | 0.900818  |
| 18               | 1                | 0              | 1.490938                | 0.609987  | 1.832683  |
| 19               | 1                | 0              | 1.317857                | 1.889490  | 0.620739  |
| 20               | 7                | 0              | -0.895902               | -0.263947 | 2.287652  |
| 21               | 8                | 0              | -1.135448               | 0.783634  | 1.655352  |
| 22               | 8                | 0              | -0.183048               | -1.158500 | 1.658848  |
| 23               | 8                | 0              | -1.251347               | -0.478736 | 3.422521  |
| 24               | 6                | 0              | 3.825964                | 0.592162  | -1.208019 |
| 25               | 1                | 0              | 4.381713                | -0.120516 | -1.825797 |
| 26               | 1                | 0              | 4.147529                | 1.597697  | -1.495334 |
| 27               | 6                | 0              | 3.838655                | -1.004797 | 0.544029  |
| 28               | 1                | 0              | 4.059453                | -1.150345 | 1.605682  |
| 29               | 1                | 0              | 4.479786                | -1.686226 | -0.023647 |
| 30               | 6                | 0              | 3.412333                | 1.289953  | 1.018599  |
| 31               | 1                | 0              | 3.643999                | 2.310768  | 0.700242  |
| 32               | 1                | 0              | 3.742077                | 1.184993  | 2.056668  |
| 33               | 7                | 0              | 4.184312                | 0.367577  | 0.187694  |
| 34               | 6                | 0              | -3.781670               | 3.003892  | 0.418619  |
| 35               | 1                | 0              | -4.570132               | 2.801278  | -0.311894 |
| 36               | 1                | 0              | -3.737190               | 2.176537  | 1.131380  |
| 37               | 1                | 0              | -4.035244               | 3.921327  | 0.959102  |
| 38               | 6                | 0              | -3.015083               | -3.386867 | -0.249669 |
| 39               | 1                | 0              | -2.927636               | -4.477104 | -0.312331 |
| 40               | 1                | 0              | -3.390499               | -3.117255 | 0.740559  |
| 41               | 1                | 0              | -3.735822               | -3.044953 | -0.999708 |
| 42               | 6                | 0              | -1.659336               | -2.725669 | -0.489711 |
| 43               | 1                | 0              | -0.966219               | -3.090418 | 0.288068  |
| 44               | 6                | 0              | -1.094214               | -3.098181 | -1.863997 |
| 45               | 1                | 0              | -0.115242               | -2.629152 | -2.035264 |
| 46               | 1                | 0              | -0.964403               | -4.181777 | -1.957889 |
| 47               | 1                | 0              | -1.771151               | -2.757705 | -2.655403 |
| 48               | 8                | 0              | -1.869518               | -1.341759 | -0.356987 |
| 49               | 1                | 0              | -1.645772               | -0.113294 | -2.207590 |

Zero-point correction= 0.419813 (Hartree/Particle)  
 Thermal correction to Energy= 0.444699  
 Thermal correction to Enthalpy= 0.445643  
 Thermal correction to Gibbs Free Energy= 0.364093  
 Sum of electronic and zero-point Energies= -2766.074522  
 Sum of electronic and thermal Energies= -2766.049636  
 Sum of electronic and thermal Enthalpies= -2766.048692  
 Sum of electronic and thermal Free Energies= -2766.130242  
 Sum of electronic and thermal Free Energies(343k)= -2766.143053

## INT10

| Center<br>Number | Atomic<br>Number | Atomic<br>Type | Coordinates (Angstroms) |           |          |
|------------------|------------------|----------------|-------------------------|-----------|----------|
|                  |                  |                | X                       | Y         | Z        |
| 1                | 6                | 0              | -2.048622               | -1.615287 | 0.942137 |
| 2                | 8                | 0              | -2.242417               | -0.597265 | 1.590089 |
| 3                | 8                | 0              | -2.996503               | -2.293569 | 0.309774 |

|    |    |   |           |           |           |
|----|----|---|-----------|-----------|-----------|
| 4  | 6  | 0 | -0.716913 | -2.206775 | 0.758344  |
| 5  | 6  | 0 | -4.318808 | -1.709855 | 0.288281  |
| 6  | 1  | 0 | -4.220502 | -0.630456 | 0.154840  |
| 7  | 1  | 0 | -4.781085 | -2.142564 | -0.599724 |
| 8  | 1  | 0 | -0.619813 | -3.129919 | 1.343215  |
| 9  | 29 | 0 | 0.561759  | -1.453663 | -0.197001 |
| 10 | 7  | 0 | 2.122400  | -0.425131 | 0.408323  |
| 11 | 6  | 0 | 2.033556  | -0.093659 | 1.857265  |
| 12 | 1  | 0 | 1.163359  | 0.553127  | 1.986657  |
| 13 | 1  | 0 | 1.855404  | -1.027512 | 2.397679  |
| 14 | 6  | 0 | 2.260826  | 0.837923  | -0.369786 |
| 15 | 1  | 0 | 2.384913  | 0.555556  | -1.417956 |
| 16 | 1  | 0 | 1.325002  | 1.386850  | -0.263400 |
| 17 | 6  | 0 | 3.333373  | -1.256355 | 0.180014  |
| 18 | 1  | 0 | 3.335320  | -1.559400 | -0.869883 |
| 19 | 1  | 0 | 3.234685  | -2.158335 | 0.793282  |
| 20 | 7  | 0 | 0.383315  | -0.911543 | -2.668758 |
| 21 | 8  | 0 | 1.188034  | -1.710780 | -2.038176 |
| 22 | 8  | 0 | -0.411596 | -0.265544 | -1.944718 |
| 23 | 8  | 0 | 0.438101  | -0.816593 | -3.873004 |
| 24 | 6  | 0 | 3.347691  | 0.600371  | 2.305323  |
| 25 | 1  | 0 | 3.133824  | 1.557234  | 2.790909  |
| 26 | 1  | 0 | 3.898198  | -0.018037 | 3.021933  |
| 27 | 6  | 0 | 3.480399  | 1.633245  | 0.164736  |
| 28 | 1  | 0 | 4.163535  | 1.897638  | -0.648568 |
| 29 | 1  | 0 | 3.157523  | 2.563828  | 0.641132  |
| 30 | 6  | 0 | 4.595583  | -0.433635 | 0.560808  |
| 31 | 1  | 0 | 5.217499  | -0.982449 | 1.275115  |
| 32 | 1  | 0 | 5.208841  | -0.231833 | -0.322998 |
| 33 | 7  | 0 | 4.217557  | 0.846855  | 1.155620  |
| 34 | 6  | 0 | -5.092542 | -2.048719 | 1.547659  |
| 35 | 1  | 0 | -5.150253 | -3.131853 | 1.689046  |
| 36 | 1  | 0 | -4.620386 | -1.596862 | 2.423269  |
| 37 | 1  | 0 | -6.111539 | -1.657211 | 1.464692  |
| 38 | 6  | 0 | -2.896942 | 1.927428  | -0.667915 |
| 39 | 1  | 0 | -2.386811 | 0.976726  | -0.843588 |
| 40 | 1  | 0 | -3.635453 | 1.801460  | 0.131790  |
| 41 | 1  | 0 | -3.421324 | 2.198277  | -1.590096 |
| 42 | 6  | 0 | -1.895307 | 3.018661  | -0.290429 |
| 43 | 6  | 0 | -0.801064 | 3.155809  | -1.347694 |
| 44 | 1  | 0 | -0.031103 | 3.853733  | -1.001934 |
| 45 | 1  | 0 | -0.346738 | 2.186809  | -1.566764 |
| 46 | 1  | 0 | -1.226770 | 3.542880  | -2.279603 |
| 47 | 6  | 0 | -2.597613 | 4.354026  | -0.047936 |
| 48 | 1  | 0 | -3.351680 | 4.257624  | 0.739382  |
| 49 | 1  | 0 | -1.874401 | 5.117410  | 0.254484  |
| 50 | 1  | 0 | -3.092084 | 4.686360  | -0.965691 |
| 51 | 8  | 0 | -1.324845 | 2.752382  | 1.004666  |
| 52 | 8  | 0 | -0.580604 | 1.538059  | 0.966482  |
| 53 | 1  | 0 | -1.225135 | 0.883278  | 1.303757  |

-----  
Zero-point correction= 0.449173 (Hartree/Particle)  
Thermal correction to Energy= 0.477769  
Thermal correction to Enthalpy= 0.478713  
Thermal correction to Gibbs Free Energy= 0.387896  
Sum of electronic and zero-point Energies= -2880.425251  
Sum of electronic and thermal Energies= -2880.396656  
Sum of electronic and thermal Enthalpies= -2880.395712  
Sum of electronic and thermal Free Energies= -2880.486529  
Sum of electronic and thermal Free Energies(343k)= -2880.500800

#### TS5

| Center<br>Number | Atomic<br>Number | Atomic<br>Type | Coordinates (Angstroms) |           |           |
|------------------|------------------|----------------|-------------------------|-----------|-----------|
|                  |                  |                | X                       | Y         | Z         |
| 1                | 6                | 0              | 2.837006                | -0.383455 | -1.178957 |
| 2                | 8                | 0              | 3.855791                | -0.455918 | -1.835926 |
| 3                | 8                | 0              | 2.820095                | -0.348542 | 0.174023  |
| 4                | 6                | 0              | 1.507915                | -0.192693 | -1.757717 |
| 5                | 6                | 0              | 4.065402                | -0.567215 | 0.851960  |
| 6                | 1                | 0              | 4.859841                | -0.049664 | 0.308876  |
| 7                | 1                | 0              | 3.926644                | -0.098593 | 1.828697  |
| 8                | 1                | 0              | 1.384586                | -0.886401 | -2.595814 |

|    |    |   |           |           |           |
|----|----|---|-----------|-----------|-----------|
| 9  | 29 | 0 | -0.036678 | -0.379345 | -0.662913 |
| 10 | 7  | 0 | -2.032700 | -0.419516 | -0.188203 |
| 11 | 6  | 0 | -2.757513 | 0.039806  | -1.402312 |
| 12 | 1  | 0 | -2.327364 | 0.995699  | -1.707668 |
| 13 | 1  | 0 | -2.557569 | -0.688144 | -2.196333 |
| 14 | 6  | 0 | -2.343836 | 0.505011  | 0.930978  |
| 15 | 1  | 0 | -1.742841 | 0.188880  | 1.787809  |
| 16 | 1  | 0 | -2.011770 | 1.502630  | 0.632515  |
| 17 | 6  | 0 | -2.521750 | -1.773350 | 0.174480  |
| 18 | 1  | 0 | -2.022788 | -2.053956 | 1.104545  |
| 19 | 1  | 0 | -2.199552 | -2.472498 | -0.601458 |
| 20 | 7  | 0 | 0.626674  | -2.373098 | 0.752498  |
| 21 | 8  | 0 | 0.436378  | -2.191620 | -0.534547 |
| 22 | 8  | 0 | 0.369577  | -1.407046 | 1.489265  |
| 23 | 8  | 0 | 1.017564  | -3.452441 | 1.129101  |
| 24 | 6  | 0 | -4.275373 | 0.148139  | -1.092336 |
| 25 | 1  | 0 | -4.609324 | 1.189648  | -1.136245 |
| 26 | 1  | 0 | -4.866500 | -0.418161 | -1.818968 |
| 27 | 6  | 0 | -3.866476 | 0.457373  | 1.232938  |
| 28 | 1  | 0 | -4.058148 | 0.033887  | 2.224054  |
| 29 | 1  | 0 | -4.301358 | 1.461675  | 1.214011  |
| 30 | 6  | 0 | -4.064833 | -1.740626 | 0.337280  |
| 31 | 1  | 0 | -4.557026 | -2.333205 | -0.440558 |
| 32 | 1  | 0 | -4.363391 | -2.156969 | 1.304433  |
| 33 | 7  | 0 | -4.562564 | -0.368144 | 0.245070  |
| 34 | 6  | 0 | 4.356480  | -2.050743 | 0.983673  |
| 35 | 1  | 0 | 3.532526  | -2.562596 | 1.489320  |
| 36 | 1  | 0 | 4.497276  | -2.499639 | -0.003194 |
| 37 | 1  | 0 | 5.272522  | -2.201461 | 1.564258  |
| 38 | 6  | 0 | 2.112530  | 3.255074  | -0.198586 |
| 39 | 1  | 0 | 2.503651  | 2.293867  | -0.544964 |
| 40 | 1  | 0 | 2.004253  | 3.927734  | -1.054847 |
| 41 | 1  | 0 | 2.856300  | 3.678271  | 0.483713  |
| 42 | 6  | 0 | 0.779211  | 3.090594  | 0.527350  |
| 43 | 6  | 0 | 0.875177  | 2.045964  | 1.634561  |
| 44 | 1  | 0 | -0.085084 | 1.928567  | 2.144692  |
| 45 | 1  | 0 | 1.201202  | 1.076529  | 1.250725  |
| 46 | 1  | 0 | 1.616003  | 2.366127  | 2.374448  |
| 47 | 6  | 0 | 0.282137  | 4.429469  | 1.072476  |
| 48 | 1  | 0 | 0.197048  | 5.168738  | 0.270799  |
| 49 | 1  | 0 | -0.696493 | 4.311810  | 1.547663  |
| 50 | 1  | 0 | 0.987088  | 4.804361  | 1.820317  |
| 51 | 8  | 0 | -0.271924 | 2.773502  | -0.415572 |
| 52 | 8  | 0 | -0.027830 | 1.541051  | -1.104687 |
| 53 | 1  | 0 | 0.890397  | 1.367181  | -1.599872 |

-----  
Zero-point correction= 0.445759 (Hartree/Particle)  
Thermal correction to Energy= 0.473110  
Thermal correction to Enthalpy= 0.474054  
Thermal correction to Gibbs Free Energy= 0.387542  
Sum of electronic and zero-point Energies= -2880.407929  
Sum of electronic and thermal Energies= -2880.380579  
Sum of electronic and thermal Enthalpies= -2880.379635  
Sum of electronic and thermal Free Energies= -2880.466146  
Sum of electronic and thermal Free Energies(343k)= -2880.479758

## INTII

-----

| Center<br>Number | Atomic<br>Number | Atomic<br>Type | Coordinates (Angstroms) |           |           |
|------------------|------------------|----------------|-------------------------|-----------|-----------|
|                  |                  |                | X                       | Y         | Z         |
| 1                | 6                | 0              | -2.800619               | -0.815870 | 1.349239  |
| 2                | 8                | 0              | -3.295757               | -1.850500 | 1.729612  |
| 3                | 8                | 0              | -3.328233               | -0.032156 | 0.394563  |
| 4                | 6                | 0              | -1.553533               | -0.216965 | 1.911701  |
| 5                | 6                | 0              | -4.532072               | -0.498768 | -0.235556 |
| 6                | 1                | 0              | -5.184991               | -0.932008 | 0.526246  |
| 7                | 1                | 0              | -4.993033               | 0.406618  | -0.635593 |
| 8                | 1                | 0              | -1.150191               | -0.869984 | 2.689751  |
| 9                | 29               | 0              | -0.109264               | -0.147951 | 0.652377  |
| 10               | 7                | 0              | 1.934603                | -0.518413 | 0.213285  |
| 11               | 6                | 0              | 2.794605                | 0.359182  | 1.052619  |
| 12               | 1                | 0              | 2.608298                | 1.386991  | 0.744819  |
| 13               | 1                | 0              | 2.462932                | 0.263074  | 2.089957  |

|    |   |   |           |           |           |
|----|---|---|-----------|-----------|-----------|
| 14 | 6 | 0 | 2.289326  | -0.303717 | -1.213121 |
| 15 | 1 | 0 | 1.709948  | -1.011081 | -1.810658 |
| 16 | 1 | 0 | 1.962922  | 0.701490  | -1.483421 |
| 17 | 6 | 0 | 2.240848  | -1.930482 | 0.565640  |
| 18 | 1 | 0 | 1.543415  | -2.576735 | 0.031881  |
| 19 | 1 | 0 | 2.043310  | -2.050485 | 1.636423  |
| 20 | 7 | 0 | -0.873772 | -1.628331 | -1.269230 |
| 21 | 8 | 0 | -0.612849 | -1.846503 | -0.003447 |
| 22 | 8 | 0 | -0.788901 | -0.445194 | -1.641838 |
| 23 | 8 | 0 | -1.159833 | -2.564664 | -1.975733 |
| 24 | 6 | 0 | 4.283315  | -0.042883 | 0.876201  |
| 25 | 1 | 0 | 4.891743  | 0.831479  | 0.622852  |
| 26 | 1 | 0 | 4.692051  | -0.469792 | 1.798080  |
| 27 | 6 | 0 | 3.816428  | -0.510941 | -1.407163 |
| 28 | 1 | 0 | 4.013199  | -1.211103 | -2.225271 |
| 29 | 1 | 0 | 4.312559  | 0.432910  | -1.655055 |
| 30 | 6 | 0 | 3.719845  | -2.249727 | 0.213582  |
| 31 | 1 | 0 | 4.237514  | -2.692870 | 1.070326  |
| 32 | 1 | 0 | 3.776381  | -2.967472 | -0.611029 |
| 33 | 7 | 0 | 4.428820  | -1.036279 | -0.186401 |
| 34 | 6 | 0 | -4.225153 | -1.498387 | -1.334340 |
| 35 | 1 | 0 | -3.544231 | -1.065077 | -2.072752 |
| 36 | 1 | 0 | -3.766578 | -2.398620 | -0.918088 |
| 37 | 1 | 0 | -5.151175 | -1.786637 | -1.842422 |
| 38 | 6 | 0 | -0.196125 | 4.282206  | 0.566689  |
| 39 | 1 | 0 | -0.540547 | 3.957638  | 1.552125  |
| 40 | 1 | 0 | 0.837935  | 4.630260  | 0.655160  |
| 41 | 1 | 0 | -0.819985 | 5.119846  | 0.238039  |
| 42 | 6 | 0 | -0.291134 | 3.128776  | -0.428233 |
| 43 | 6 | 0 | -1.722448 | 2.627642  | -0.575220 |
| 44 | 1 | 0 | -1.765634 | 1.750275  | -1.225623 |
| 45 | 1 | 0 | -2.150285 | 2.357523  | 0.391901  |
| 46 | 1 | 0 | -2.341462 | 3.418211  | -1.012611 |
| 47 | 6 | 0 | 0.306820  | 3.498355  | -1.783125 |
| 48 | 1 | 0 | 1.361056  | 3.773797  | -1.676632 |
| 49 | 1 | 0 | 0.228512  | 2.657166  | -2.479109 |
| 50 | 1 | 0 | -0.230801 | 4.351436  | -2.207826 |
| 51 | 8 | 0 | 0.595517  | 2.069395  | 0.006399  |
| 52 | 8 | 0 | 0.168356  | 1.518929  | 1.236047  |
| 53 | 1 | 0 | -1.708767 | 0.799890  | 2.267695  |

-----  
Zero-point correction= 0.451202 (Hartree/Particle)  
Thermal correction to Energy= 0.478606  
Thermal correction to Enthalpy= 0.479550  
Thermal correction to Gibbs Free Energy= 0.392641  
Sum of electronic and zero-point Energies= -2880.474355  
Sum of electronic and thermal Energies= -2880.446952  
Sum of electronic and thermal Enthalpies= -2880.446007  
Sum of electronic and thermal Free Energies= -2880.532917  
Sum of electronic and thermal Free Energies(343k)= -2880.546589

INT12

-----

| Center<br>Number | Atomic<br>Number | Atomic<br>Type | Coordinates (Angstroms) |           |           |
|------------------|------------------|----------------|-------------------------|-----------|-----------|
|                  |                  |                | X                       | Y         | Z         |
| 1                | 6                | 0              | -2.829789               | -0.507828 | -1.347164 |
| 2                | 8                | 0              | -2.921282               | 0.524073  | -1.986967 |
| 3                | 8                | 0              | -3.850415               | -1.268799 | -0.959525 |
| 4                | 6                | 0              | -1.520683               | -1.003182 | -0.907081 |
| 5                | 6                | 0              | -5.174722               | -0.757951 | -1.217272 |
| 6                | 1                | 0              | -5.194026               | -0.304432 | -2.210724 |
| 7                | 1                | 0              | -5.808379               | -1.646522 | -1.212691 |
| 8                | 1                | 0              | -1.130770               | -1.771056 | -1.587014 |
| 9                | 29               | 0              | -0.549194               | -0.204426 | 0.327095  |
| 10               | 7                | 0              | 0.532587                | 1.375410  | -0.128905 |
| 11               | 6                | 0              | 1.368917                | 1.047565  | -1.312766 |
| 12               | 1                | 0              | 1.989969                | 0.186357  | -1.062391 |
| 13               | 1                | 0              | 0.685648                | 0.749844  | -2.112492 |
| 14               | 6                | 0              | 1.403414                | 1.852861  | 0.974231  |
| 15               | 1                | 0              | 0.760345                | 2.045946  | 1.835093  |
| 16               | 1                | 0              | 2.081650                | 1.037846  | 1.233185  |
| 17               | 6                | 0              | -0.404107               | 2.471596  | -0.497042 |
| 18               | 1                | 0              | -0.983635               | 2.709106  | 0.398519  |

|    |   |   |           |           |           |
|----|---|---|-----------|-----------|-----------|
| 19 | 1 | 0 | -1.097111 | 2.085581  | -1.249494 |
| 20 | 7 | 0 | -0.823581 | 0.159485  | 2.852993  |
| 21 | 8 | 0 | -1.568752 | 0.902558  | 2.172649  |
| 22 | 8 | 0 | -0.022745 | -0.603977 | 2.177935  |
| 23 | 8 | 0 | -0.810418 | 0.134207  | 4.063696  |
| 24 | 6 | 0 | 2.219667  | 2.283650  | -1.701933 |
| 25 | 1 | 0 | 3.285827  | 2.081990  | -1.555574 |
| 26 | 1 | 0 | 2.072621  | 2.543404  | -2.755152 |
| 27 | 6 | 0 | 2.157490  | 3.130655  | 0.517694  |
| 28 | 1 | 0 | 1.870879  | 3.993438  | 1.127455  |
| 29 | 1 | 0 | 3.239902  | 3.001121  | 0.618416  |
| 30 | 6 | 0 | 0.417465  | 3.685268  | -1.012152 |
| 31 | 1 | 0 | 0.202922  | 3.882514  | -2.067274 |
| 32 | 1 | 0 | 0.169919  | 4.592108  | -0.451415 |
| 33 | 7 | 0 | 1.855109  | 3.437408  | -0.879938 |
| 34 | 6 | 0 | -5.588341 | 0.231344  | -0.144088 |
| 35 | 1 | 0 | -5.518201 | -0.224882 | 0.847186  |
| 36 | 1 | 0 | -4.947925 | 1.116896  | -0.169487 |
| 37 | 1 | 0 | -6.623089 | 0.547523  | -0.310858 |
| 38 | 6 | 0 | 2.683868  | -1.706548 | 0.926490  |
| 39 | 6 | 0 | 2.037025  | -2.469844 | -0.054996 |
| 40 | 6 | 0 | 2.582179  | -2.490007 | -1.346650 |
| 41 | 6 | 0 | 3.750603  | -1.795959 | -1.638626 |
| 42 | 6 | 0 | 4.396382  | -1.057603 | -0.647309 |
| 43 | 6 | 0 | 3.855251  | -1.012070 | 0.634518  |
| 44 | 1 | 0 | 2.254301  | -1.653708 | 1.922889  |
| 45 | 1 | 0 | 2.083147  | -3.046770 | -2.134613 |
| 46 | 1 | 0 | 4.158527  | -1.827912 | -2.644697 |
| 47 | 1 | 0 | 5.311887  | -0.519945 | -0.875615 |
| 48 | 1 | 0 | 4.346952  | -0.437426 | 1.414518  |
| 49 | 6 | 0 | 0.821891  | -3.223704 | 0.312415  |
| 50 | 1 | 0 | 0.363692  | -2.926878 | 1.254347  |
| 51 | 6 | 0 | 0.275507  | -4.224382 | -0.381108 |
| 52 | 1 | 0 | 0.700382  | -4.599153 | -1.308921 |
| 53 | 1 | 0 | -0.620850 | -4.720429 | -0.023260 |

-----

Zero-point correction= 0.441394 (Hartree/Particle)  
Thermal correction to Energy= 0.469804  
Thermal correction to Enthalpy= 0.470748  
Thermal correction to Gibbs Free Energy= 0.376871  
Sum of electronic and zero-point Energies= -2881.259277  
Sum of electronic and thermal Energies= -2881.230867  
Sum of electronic and thermal Enthalpies= -2881.229923  
Sum of electronic and thermal Free Energies= -2881.323800  
Sum of electronic and thermal Free Energies(343k)= -2881.338528

## TS6

-----

| Center<br>Number | Atomic<br>Number | Atomic<br>Type | Coordinates (Angstroms) |           |           |
|------------------|------------------|----------------|-------------------------|-----------|-----------|
|                  |                  |                | X                       | Y         | Z         |
| 1                | 6                | 0              | -2.500591               | -0.035644 | -1.653702 |
| 2                | 8                | 0              | -2.642800               | 0.622901  | -2.664357 |
| 3                | 8                | 0              | -3.378477               | -0.095189 | -0.649846 |
| 4                | 6                | 0              | -1.207400               | -0.693284 | -1.378512 |
| 5                | 6                | 0              | -4.459427               | 0.855350  | -0.687980 |
| 6                | 1                | 0              | -4.058341               | 1.819762  | -1.007473 |
| 7                | 1                | 0              | -5.192484               | 0.523282  | -1.430210 |
| 8                | 1                | 0              | -0.868706               | -1.357605 | -2.173009 |
| 9                | 29               | 0              | -0.258082               | 0.193198  | -0.136883 |
| 10               | 7                | 0              | 1.482427                | 1.168708  | -0.222745 |
| 11               | 6                | 0              | 2.382155                | 0.347858  | -1.067018 |
| 12               | 1                | 0              | 2.484340                | -0.632027 | -0.591044 |
| 13               | 1                | 0              | 1.882451                | 0.196561  | -2.028034 |
| 14               | 6                | 0              | 2.110554                | 1.353412  | 1.106278  |
| 15               | 1                | 0              | 1.419795                | 1.939129  | 1.717527  |
| 16               | 1                | 0              | 2.199026                | 0.366425  | 1.569037  |
| 17               | 6                | 0              | 1.301744                | 2.496318  | -0.855085 |
| 18               | 1                | 0              | 0.605822                | 3.062082  | -0.230453 |
| 19               | 1                | 0              | 0.819396                | 2.338128  | -1.824374 |
| 20               | 7                | 0              | -1.456212               | 1.148986  | 1.908705  |
| 21               | 8                | 0              | -1.492045               | 1.866783  | 0.878352  |
| 22               | 8                | 0              | -0.674030               | 0.128086  | 1.862874  |
| 23               | 8                | 0              | -2.113425               | 1.379847  | 2.905350  |

|    |   |   |           |           |           |
|----|---|---|-----------|-----------|-----------|
| 24 | 6 | 0 | 3.749824  | 1.067823  | -1.219959 |
| 25 | 1 | 0 | 4.566520  | 0.445679  | -0.839182 |
| 26 | 1 | 0 | 3.965247  | 1.286676  | -2.270971 |
| 27 | 6 | 0 | 3.487548  | 2.050203  | 0.934221  |
| 28 | 1 | 0 | 3.521595  | 2.997030  | 1.482634  |
| 29 | 1 | 0 | 4.298591  | 1.420685  | 1.314927  |
| 30 | 6 | 0 | 2.684233  | 3.190791  | -0.997414 |
| 31 | 1 | 0 | 2.905363  | 3.416209  | -2.045740 |
| 32 | 1 | 0 | 2.709932  | 4.136145  | -0.446028 |
| 33 | 7 | 0 | 3.749145  | 2.329359  | -0.478540 |
| 34 | 6 | 0 | -5.043975 | 0.927473  | 0.705731  |
| 35 | 1 | 0 | -5.416089 | -0.050001 | 1.027786  |
| 36 | 1 | 0 | -4.290745 | 1.272279  | 1.419633  |
| 37 | 1 | 0 | -5.880101 | 1.633944  | 0.714985  |
| 38 | 6 | 0 | 0.935408  | -2.451888 | 1.487092  |
| 39 | 6 | 0 | 0.239489  | -2.755286 | 0.309822  |
| 40 | 6 | 0 | 0.947065  | -3.309657 | -0.764089 |
| 41 | 6 | 0 | 2.311277  | -3.553332 | -0.664134 |
| 42 | 6 | 0 | 2.994003  | -3.249502 | 0.512684  |
| 43 | 6 | 0 | 2.301145  | -2.698154 | 1.587284  |
| 44 | 1 | 0 | 0.401809  | -1.998112 | 2.316781  |
| 45 | 1 | 0 | 0.434719  | -3.544664 | -1.692733 |
| 46 | 1 | 0 | 2.843795  | -3.981806 | -1.507854 |
| 47 | 1 | 0 | 4.059807  | -3.442037 | 0.590648  |
| 48 | 1 | 0 | 2.822631  | -2.460125 | 2.509652  |
| 49 | 6 | 0 | -1.206063 | -2.456353 | 0.245031  |
| 50 | 1 | 0 | -1.603903 | -1.911213 | 1.096871  |
| 51 | 6 | 0 | -2.072021 | -2.868780 | -0.708440 |
| 52 | 1 | 0 | -1.769640 | -3.488998 | -1.547117 |
| 53 | 1 | 0 | -3.127560 | -2.643049 | -0.618435 |

-----

Zero-point correction= 0.442141 (Hartree/Particle)  
Thermal correction to Energy= 0.469226  
Thermal correction to Enthalpy= 0.470170  
Thermal correction to Gibbs Free Energy= 0.382111  
Sum of electronic and zero-point Energies= -2881.250762  
Sum of electronic and thermal Energies= -2881.223677  
Sum of electronic and thermal Enthalpies= -2881.222733  
Sum of electronic and thermal Free Energies= -2881.310792  
Sum of electronic and thermal Free Energies(343k)= -2881.324628

### INT13

-----

| Center<br>Number | Atomic<br>Number | Atomic<br>Type | Coordinates (Angstroms) |           |           |
|------------------|------------------|----------------|-------------------------|-----------|-----------|
|                  |                  |                | X                       | Y         | Z         |
| 1                | 6                | 0              | -1.931158               | -0.885878 | -0.448577 |
| 2                | 8                | 0              | -2.391739               | -1.578712 | -1.325998 |
| 3                | 8                | 0              | -2.596645               | 0.142461  | 0.110877  |
| 4                | 6                | 0              | -0.576188               | -1.063524 | 0.132900  |
| 5                | 6                | 0              | -3.911847               | 0.387501  | -0.405708 |
| 6                | 1                | 0              | -3.839214               | 0.582803  | -1.479843 |
| 7                | 1                | 0              | -4.517601               | -0.513952 | -0.273458 |
| 8                | 1                | 0              | -0.044420               | -1.898214 | -0.310722 |
| 9                | 6                | 0              | -4.484187               | 1.569400  | 0.347289  |
| 10               | 1                | 0              | -4.546367               | 1.356476  | 1.418470  |
| 11               | 1                | 0              | -3.863832               | 2.459222  | 0.205978  |
| 12               | 1                | 0              | -5.491404               | 1.788629  | -0.020072 |
| 13               | 6                | 0              | 2.282156                | 1.406688  | -0.217407 |
| 14               | 6                | 0              | 1.711923                | 0.202300  | 0.201301  |
| 15               | 6                | 0              | 2.538080                | -0.921187 | 0.308748  |
| 16               | 6                | 0              | 3.892676                | -0.840680 | 0.006959  |
| 17               | 6                | 0              | 4.449744                | 0.366313  | -0.407782 |
| 18               | 6                | 0              | 3.638191                | 1.490787  | -0.518013 |
| 19               | 1                | 0              | 1.655260                | 2.290358  | -0.307261 |
| 20               | 1                | 0              | 2.124974                | -1.874352 | 0.630184  |
| 21               | 1                | 0              | 4.515430                | -1.726104 | 0.095478  |
| 22               | 1                | 0              | 5.508150                | 0.429445  | -0.641530 |
| 23               | 1                | 0              | 4.059926                | 2.438029  | -0.841208 |
| 24               | 6                | 0              | 0.255507                | 0.156854  | 0.515980  |
| 25               | 1                | 0              | -0.259798               | 1.104853  | 0.392142  |
| 26               | 6                | 0              | -0.304740               | -0.735744 | 1.579708  |
| 27               | 1                | 0              | 0.379981                | -1.387122 | 2.114537  |
| 28               | 1                | 0              | -1.134951               | -0.357038 | 2.165888  |

```

-----
Zero-point correction=          0.237898 (Hartree/Particle)
Thermal correction to Energy=   0.251020
Thermal correction to Enthalpy= 0.251964
Thermal correction to Gibbs Free Energy= 0.196044
Sum of electronic and zero-point Energies= -615.713439
Sum of electronic and thermal Energies= -615.700317
Sum of electronic and thermal Enthalpies= -615.699372
Sum of electronic and thermal Free Energies= -615.755293
Sum of electronic and thermal Free Energies(343k)= -615.764006

```

#### INT14

```

-----
Center   Atomic   Atomic   Coordinates (Angstroms)
Number   Number   Type     X           Y           Z
-----
  1         6         0       1.070460    2.277271    0.467042
  2         8         0       1.832166    2.190595   -0.508980
  3         8         0      -0.068158    3.024374    0.357744
  4         6         0       1.231946    1.651359    1.757228
  5         6         0     -0.349560    3.548846   -0.936472
  6         1         0       0.421116    4.273989   -1.216841
  7         1         0     -0.320022    2.741637   -1.677593
  8         1         0       0.716029    2.173141    2.563738
  9         29        0       0.218652    0.185604    1.070233
 10        7         0     -1.329727   -0.752169    0.410425
 11         6         0     -2.490178   -0.513528    1.303095
 12         1         0     -2.272126   -0.988004    2.264337
 13         1         0     -2.560289    0.563526    1.476662
 14         6         0     -1.169553   -2.212766    0.209422
 15         1         0     -0.317062   -2.347362   -0.458691
 16         1         0     -0.912353   -2.655390    1.177064
 17         6         0     -1.611934   -0.117880   -0.906771
 18         1         0     -0.720980   -0.228713   -1.529832
 19         1         0     -1.759014    0.950584   -0.721311
 20         6         0     -3.776763   -1.086097    0.646664
 21         1         0     -4.264540   -1.813750    1.303548
 22         1         0     -4.501926   -0.291378    0.443221
 23         6         0     -2.481274   -2.807147   -0.369857
 24         1         0     -2.291888   -3.329855   -1.312910
 25         1         0     -2.928706   -3.528827    0.321731
 26         6         0     -2.870920   -0.769032   -1.537218
 27         1         0     -3.629488   -0.014818   -1.770609
 28         1         0     -2.622550   -1.284172   -2.470586
 29         7         0     -3.458574   -1.747336   -0.619291
 30         6         0     -1.721493    4.189790   -0.872534
 31         1         0     -2.485554    3.449266   -0.612556
 32         1         0     -1.743990    4.980253   -0.116991
 33         1         0     -1.979377    4.627550   -1.842094
 34         1         0       2.279571    1.457255    1.984984
 35         6         0       2.785500   -1.506882   -0.250905
 36         6         0       3.096916   -2.550524   -1.318396
 37         1         0       2.280901   -3.276912   -1.394339
 38         1         0       3.228294   -2.069879   -2.290798
 39         1         0       4.017406   -3.087922   -1.066923
 40         6         0       2.469130   -2.152308    1.096717
 41         1         0       3.369550   -2.606816    1.519677
 42         1         0       2.097637   -1.393786    1.794211
 43         1         0       1.707091   -2.931382    0.989875
 44         6         0       3.901629   -0.475092   -0.121639
 45         1         0       4.083424    0.018652   -1.078910
 46         1         0       3.636444    0.290167    0.611083
 47         1         0       4.826969   -0.967212    0.195073
 48         8         0       1.534636   -0.855946   -0.572928
 49         8         0       1.642644   -0.137691   -1.802171
 50         1         0       1.788884    0.777465   -1.446495

```

```

-----
Zero-point correction=          0.443444 (Hartree/Particle)
Thermal correction to Energy=   0.467928
Thermal correction to Enthalpy= 0.468872
Thermal correction to Gibbs Free Energy= 0.387598
Sum of electronic and zero-point Energies= -2600.861883

```

Sum of electronic and thermal Energies= -2600.837399  
 Sum of electronic and thermal Enthalpies= -2600.836454  
 Sum of electronic and thermal Free Energies= -2600.917729  
 Sum of electronic and thermal Free Energies(343k)= -2600.930492

**TS7**

| Center Number | Atomic Number | Atomic Type | Coordinates (Angstroms) |           |           |
|---------------|---------------|-------------|-------------------------|-----------|-----------|
|               |               |             | X                       | Y         | Z         |
| 1             | 6             | 0           | 0.855888                | 2.312154  | 0.800331  |
| 2             | 8             | 0           | 1.893380                | 2.471841  | 0.130781  |
| 3             | 8             | 0           | -0.268748               | 3.000001  | 0.458037  |
| 4             | 6             | 0           | 0.649287                | 1.374048  | 1.864997  |
| 5             | 6             | 0           | -0.207012               | 3.739584  | -0.760352 |
| 6             | 1             | 0           | 0.567164                | 4.509212  | -0.685328 |
| 7             | 1             | 0           | 0.074278                | 3.068414  | -1.579388 |
| 8             | 1             | 0           | -0.224186               | 1.593691  | 2.478681  |
| 9             | 29            | 0           | 0.468913                | -0.113630 | 0.569023  |
| 10            | 7             | 0           | -1.401195               | -0.891298 | 0.205534  |
| 11            | 6             | 0           | -2.182197               | -1.049819 | 1.449120  |
| 12            | 1             | 0           | -1.672569               | -1.793703 | 2.070068  |
| 13            | 1             | 0           | -2.145286               | -0.096406 | 1.983649  |
| 14            | 6             | 0           | -1.392280               | -2.173004 | -0.527734 |
| 15            | 1             | 0           | -0.786117               | -2.032503 | -1.426725 |
| 16            | 1             | 0           | -0.877656               | -2.909757 | 0.097457  |
| 17            | 6             | 0           | -2.054656               | 0.136843  | -0.638707 |
| 18            | 1             | 0           | -1.443665               | 0.255092  | -1.538453 |
| 19            | 1             | 0           | -2.018670               | 1.084691  | -0.092615 |
| 20            | 6             | 0           | -3.635746               | -1.477708 | 1.101720  |
| 21            | 1             | 0           | -3.884586               | -2.441914 | 1.557347  |
| 22            | 1             | 0           | -4.362151               | -0.744603 | 1.467634  |
| 23            | 6             | 0           | -2.852463               | -2.595670 | -0.852632 |
| 24            | 1             | 0           | -3.004101               | -2.696776 | -1.932317 |
| 25            | 1             | 0           | -3.096312               | -3.560585 | -0.395660 |
| 26            | 6             | 0           | -3.506532               | -0.305485 | -0.969066 |
| 27            | 1             | 0           | -4.236393               | 0.423820  | -0.602252 |
| 28            | 1             | 0           | -3.655187               | -0.404282 | -2.049425 |
| 29            | 7             | 0           | -3.799581               | -1.599396 | -0.347879 |
| 30            | 6             | 0           | -1.576750               | 4.347023  | -0.987000 |
| 31            | 1             | 0           | -2.340041               | 3.566588  | -1.072355 |
| 32            | 1             | 0           | -1.851125               | 5.005688  | -0.157743 |
| 33            | 1             | 0           | -1.579868               | 4.933219  | -1.911577 |
| 34            | 1             | 0           | 1.551983                | 1.203358  | 2.452884  |
| 35            | 6             | 0           | 3.057809                | -1.429792 | -0.289500 |
| 36            | 6             | 0           | 3.713303                | -1.299994 | -1.662726 |
| 37            | 1             | 0           | 3.189722                | -1.929382 | -2.387981 |
| 38            | 1             | 0           | 3.681178                | -0.268803 | -2.017956 |
| 39            | 1             | 0           | 4.759214                | -1.618926 | -1.606723 |
| 40            | 6             | 0           | 3.152214                | -2.877815 | 0.214270  |
| 41            | 1             | 0           | 4.205936                | -3.141394 | 0.352433  |
| 42            | 1             | 0           | 2.637997                | -2.988457 | 1.173710  |
| 43            | 1             | 0           | 2.708998                | -3.568403 | -0.508846 |
| 44            | 6             | 0           | 3.664866                | -0.472056 | 0.733935  |
| 45            | 1             | 0           | 3.491320                | 0.576599  | 0.474200  |
| 46            | 1             | 0           | 3.233193                | -0.646172 | 1.725091  |
| 47            | 1             | 0           | 4.746050                | -0.633722 | 0.796364  |
| 48            | 8             | 0           | 1.640223                | -1.264072 | -0.392940 |
| 49            | 8             | 0           | 1.376416                | 0.246572  | -1.224935 |
| 50            | 1             | 0           | 1.893283                | 0.980967  | -0.796902 |

Zero-point correction= 0.440167 (Hartree/Particle)  
 Thermal correction to Energy= 0.464384  
 Thermal correction to Enthalpy= 0.465329  
 Thermal correction to Gibbs Free Energy= 0.384616  
 Sum of electronic and zero-point Energies= -2600.824913  
 Sum of electronic and thermal Energies= -2600.800696  
 Sum of electronic and thermal Enthalpies= -2600.799752  
 Sum of electronic and thermal Free Energies= -2600.880464  
 Sum of electronic and thermal Free Energies(343k)= -2600.893139

**NT15**



| Center<br>Number | Atomic<br>Number | Atomic<br>Type | Coordinates (Angstroms) |           |           |
|------------------|------------------|----------------|-------------------------|-----------|-----------|
|                  |                  |                | X                       | Y         | Z         |
| 1                | 6                | 0              | -1.742569               | 2.177673  | 0.617750  |
| 2                | 8                | 0              | -1.587348               | 3.345022  | 0.319810  |
| 3                | 8                | 0              | -2.620701               | 1.378759  | -0.030144 |
| 4                | 6                | 0              | -0.961369               | 1.443415  | 1.637308  |
| 5                | 6                | 0              | -3.334774               | 1.969629  | -1.124058 |
| 6                | 1                | 0              | -4.005279               | 2.742552  | -0.736269 |
| 7                | 1                | 0              | -2.620455               | 2.453778  | -1.795811 |
| 8                | 1                | 0              | -1.543735               | 0.664743  | 2.121356  |
| 9                | 29               | 0              | 0.561168                | 0.672710  | 0.723535  |
| 10               | 7                | 0              | -0.271707               | -1.168826 | 0.524598  |
| 11               | 6                | 0              | 0.662977                | -2.244359 | 0.975293  |
| 12               | 1                | 0              | 1.669194                | -1.931620 | 0.699143  |
| 13               | 1                | 0              | 0.589745                | -2.279159 | 2.067021  |
| 14               | 6                | 0              | -0.406566               | -1.219391 | -0.964326 |
| 15               | 1                | 0              | -1.026571               | -0.367049 | -1.259881 |
| 16               | 1                | 0              | 0.597365                | -1.075589 | -1.362444 |
| 17               | 6                | 0              | -1.604608               | -1.488400 | 1.107062  |
| 18               | 1                | 0              | -2.323407               | -0.768094 | 0.715114  |
| 19               | 1                | 0              | -1.540599               | -1.364131 | 2.191208  |
| 20               | 6                | 0              | 0.247172                | -3.588444 | 0.328286  |
| 21               | 1                | 0              | 0.949499                | -3.871522 | -0.462204 |
| 22               | 1                | 0              | 0.249013                | -4.391475 | 1.072272  |
| 23               | 6                | 0              | -1.034428               | -2.568736 | -1.393795 |
| 24               | 1                | 0              | -2.053671               | -2.430732 | -1.770424 |
| 25               | 1                | 0              | -0.446356               | -3.024363 | -2.196434 |
| 26               | 6                | 0              | -1.997316               | -2.946355 | 0.737089  |
| 27               | 1                | 0              | -1.967212               | -3.595905 | 1.617890  |
| 28               | 1                | 0              | -3.017980               | -2.975176 | 0.342401  |
| 29               | 7                | 0              | -1.088187               | -3.494584 | -0.263777 |
| 30               | 6                | 0              | -4.096508               | 0.855737  | -1.811859 |
| 31               | 1                | 0              | -3.409386               | 0.095435  | -2.197884 |
| 32               | 1                | 0              | -4.793923               | 0.374561  | -1.119627 |
| 33               | 1                | 0              | -4.667811               | 1.258232  | -2.653544 |
| 34               | 1                | 0              | -0.566240               | 2.138222  | 2.376701  |
| 35               | 6                | 0              | 3.154868                | 0.435628  | -0.647821 |
| 36               | 6                | 0              | 2.681761                | 1.228817  | -1.875000 |
| 37               | 1                | 0              | 2.058119                | 0.591751  | -2.515518 |
| 38               | 1                | 0              | 2.095497                | 2.092627  | -1.556118 |
| 39               | 1                | 0              | 3.533318                | 1.576218  | -2.471815 |
| 40               | 6                | 0              | 3.962630                | -0.785946 | -1.117309 |
| 41               | 1                | 0              | 4.850376                | -0.481747 | -1.684092 |
| 42               | 1                | 0              | 4.288821                | -1.376150 | -0.253641 |
| 43               | 1                | 0              | 3.344675                | -1.426028 | -1.758641 |
| 44               | 6                | 0              | 4.033553                | 1.307559  | 0.258247  |
| 45               | 1                | 0              | 3.465812                | 2.169434  | 0.612035  |
| 46               | 1                | 0              | 4.359563                | 0.721866  | 1.125572  |
| 47               | 1                | 0              | 4.925661                | 1.658064  | -0.275220 |
| 48               | 8                | 0              | 2.065473                | -0.102239 | 0.061601  |
| 49               | 8                | 0              | 1.190219                | 2.318679  | 0.563308  |
| 50               | 1                | 0              | 0.481279                | 2.973815  | 0.642786  |

Zero-point correction= 0.445414 (Hartree/Particle)  
 Thermal correction to Energy= 0.468895  
 Thermal correction to Enthalpy= 0.469839  
 Thermal correction to Gibbs Free Energy= 0.392185  
 Sum of electronic and zero-point Energies= -2600.923384  
 Sum of electronic and thermal Energies= -2600.899903  
 Sum of electronic and thermal Enthalpies= -2600.898959  
 Sum of electronic and thermal Free Energies= -2600.976613  
 Sum of electronic and thermal Free Energies(343k)= -2600.988827

#### INT16

| Center<br>Number | Atomic<br>Number | Atomic<br>Type | Coordinates (Angstroms) |           |           |
|------------------|------------------|----------------|-------------------------|-----------|-----------|
|                  |                  |                | X                       | Y         | Z         |
| 1                | 6                | 0              | 1.084434                | 0.077343  | -0.000047 |
| 2                | 8                | 0              | 1.287161                | 1.278604  | -0.000197 |
| 3                | 8                | 0              | -0.148259               | -0.471401 | 0.000206  |
| 4                | 6                | 0              | 2.125892                | -0.928637 | -0.000045 |
| 5                | 6                | 0              | -1.238081               | 0.458135  | 0.000445  |

|    |   |   |           |           |           |
|----|---|---|-----------|-----------|-----------|
| 6  | 1 | 0 | -1.160250 | 1.100550  | 0.883568  |
| 7  | 1 | 0 | -1.159784 | 1.101671  | -0.881814 |
| 8  | 1 | 0 | 3.156579  | -0.598524 | -0.000625 |
| 9  | 6 | 0 | -2.520807 | -0.346687 | -0.000362 |
| 10 | 1 | 0 | -2.579357 | -0.982867 | -0.888253 |
| 11 | 1 | 0 | -2.580096 | -0.983617 | 0.886938  |
| 12 | 1 | 0 | -3.381798 | 0.328852  | -0.000447 |
| 13 | 1 | 0 | 1.884861  | -1.984617 | 0.000614  |

-----  
Zero-point correction= 0.105978 (Hartree/Particle)  
Thermal correction to Energy= 0.113095  
Thermal correction to Enthalpy= 0.114039  
Thermal correction to Gibbs Free Energy= 0.074076  
Sum of electronic and zero-point Energies= -306.836411  
Sum of electronic and thermal Energies= -306.829293  
Sum of electronic and thermal Enthalpies= -306.828349  
Sum of electronic and thermal Free Energies= -306.868312  
Sum of electronic and thermal Free Energies(343k)= -306.874483

### INT17

| Center<br>Number | Atomic<br>Number | Atomic<br>Type | Coordinates (Angstroms) |           |           |
|------------------|------------------|----------------|-------------------------|-----------|-----------|
|                  |                  |                | X                       | Y         | Z         |
| 1                | 29               | 0              | 0.663902                | -1.006492 | -0.085668 |
| 2                | 7                | 0              | -1.147919               | -0.212838 | -0.001526 |
| 3                | 6                | 0              | -1.392316               | 0.427736  | -1.319626 |
| 4                | 1                | 0              | -0.558429               | 1.110175  | -1.496762 |
| 5                | 1                | 0              | -1.352531               | -0.361185 | -2.077591 |
| 6                | 6                | 0              | -1.173780               | 0.830565  | 1.053609  |
| 7                | 1                | 0              | -0.965026               | 0.337101  | 2.009047  |
| 8                | 1                | 0              | -0.344548               | 1.506632  | 0.837551  |
| 9                | 6                | 0              | -2.212912               | -1.206297 | 0.262302  |
| 10               | 1                | 0              | -1.996797               | -1.676157 | 1.225882  |
| 11               | 1                | 0              | -2.139305               | -1.983488 | -0.501826 |
| 12               | 6                | 0              | -2.772904               | 1.136880  | -1.290955 |
| 13               | 1                | 0              | -2.663216               | 2.211224  | -1.468524 |
| 14               | 1                | 0              | -3.437859               | 0.741438  | -2.065430 |
| 15               | 6                | 0              | -2.563646               | 1.521056  | 1.050335  |
| 16               | 1                | 0              | -3.068176               | 1.399077  | 2.014277  |
| 17               | 1                | 0              | -2.465031               | 2.595074  | 0.864383  |
| 18               | 6                | 0              | -3.588436               | -0.480988 | 0.257451  |
| 19               | 1                | 0              | -4.243829               | -0.888694 | -0.518716 |
| 20               | 1                | 0              | -4.099927               | -0.605567 | 1.217277  |
| 21               | 7                | 0              | -3.419223               | 0.950580  | 0.008967  |
| 22               | 6                | 0              | 2.764340                | 0.754545  | 0.005524  |
| 23               | 6                | 0              | 2.903005                | 0.295013  | 1.467893  |
| 24               | 1                | 0              | 2.179598                | 0.831727  | 2.093196  |
| 25               | 1                | 0              | 2.699895                | -0.781958 | 1.551745  |
| 26               | 1                | 0              | 3.907418                | 0.470724  | 1.869363  |
| 27               | 6                | 0              | 3.100981                | 2.245196  | -0.101623 |
| 28               | 1                | 0              | 4.135117                | 2.452717  | 0.196896  |
| 29               | 1                | 0              | 2.961523                | 2.580794  | -1.134456 |
| 30               | 1                | 0              | 2.428966                | 2.827869  | 0.538391  |
| 31               | 6                | 0              | 3.711093                | -0.063403 | -0.885804 |
| 32               | 1                | 0              | 3.477297                | -1.133319 | -0.812220 |
| 33               | 1                | 0              | 3.584876                | 0.238532  | -1.930701 |
| 34               | 1                | 0              | 4.762443                | 0.073170  | -0.605989 |
| 35               | 8                | 0              | 1.437148                | 0.594143  | -0.417017 |
| 36               | 8                | 0              | 0.649286                | -2.781231 | 0.010938  |
| 37               | 1                | 0              | 0.570374                | -3.186915 | 0.880497  |

-----  
Zero-point correction= 0.330535 (Hartree/Particle)  
Thermal correction to Energy= 0.347923  
Thermal correction to Enthalpy= 0.348867  
Thermal correction to Gibbs Free Energy= 0.283195  
Sum of electronic and zero-point Energies= -2294.050985  
Sum of electronic and thermal Energies= -2294.033598  
Sum of electronic and thermal Enthalpies= -2294.032654  
Sum of electronic and thermal Free Energies= -2294.098326  
Sum of electronic and thermal Free Energies(343k)= -2294.108598

### INT18

| Center<br>Number | Atomic<br>Number | Atomic<br>Type | Coordinates (Angstroms) |           |           |
|------------------|------------------|----------------|-------------------------|-----------|-----------|
|                  |                  |                | X                       | Y         | Z         |
| 1                | 6                | 0              | 3.003384                | -0.463503 | -0.731509 |
| 2                | 8                | 0              | 3.328119                | 0.574985  | -0.158742 |
| 3                | 8                | 0              | 3.436873                | -1.674761 | -0.267820 |
| 4                | 6                | 0              | 2.084370                | -0.593596 | -1.848608 |
| 5                | 6                | 0              | 4.107554                | -1.668877 | 0.989387  |
| 6                | 1                | 0              | 4.702572                | -2.585636 | 0.996330  |
| 7                | 1                | 0              | 4.775715                | -0.806508 | 1.045645  |
| 8                | 1                | 0              | 2.125866                | 0.273109  | -2.508771 |
| 9                | 7                | 0              | 0.009143                | 1.289698  | -0.229189 |
| 10               | 6                | 0              | -1.439165               | 1.556657  | -0.418982 |
| 11               | 1                | 0              | -1.689289               | 1.326445  | -1.459490 |
| 12               | 1                | 0              | -1.995966               | 0.862277  | 0.211452  |
| 13               | 6                | 0              | 0.778936                | 2.267401  | -1.046642 |
| 14               | 1                | 0              | 1.836035                | 2.018427  | -0.936442 |
| 15               | 1                | 0              | 0.495031                | 2.108454  | -2.091220 |
| 16               | 6                | 0              | 0.350229                | 1.513393  | 1.200027  |
| 17               | 1                | 0              | 1.426656                | 1.346352  | 1.296475  |
| 18               | 1                | 0              | -0.173384               | 0.754761  | 1.789343  |
| 19               | 1                | 0              | 2.211679                | -1.528814 | -2.392493 |
| 20               | 29               | 0              | 0.489363                | -0.620056 | -0.666049 |
| 21               | 6                | 0              | 3.113723                | -1.658754 | 2.141274  |
| 22               | 1                | 0              | 2.431979                | -2.513551 | 2.074710  |
| 23               | 1                | 0              | 3.638063                | -1.711928 | 3.101302  |
| 24               | 1                | 0              | 2.524769                | -0.736485 | 2.125144  |
| 25               | 6                | 0              | -1.753435               | 3.032817  | -0.055604 |
| 26               | 1                | 0              | -2.099497               | 3.592116  | -0.930922 |
| 27               | 1                | 0              | -2.543620               | 3.084279  | 0.700595  |
| 28               | 6                | 0              | -0.061102               | 2.950698  | 1.619353  |
| 29               | 1                | 0              | -0.846925               | 2.928644  | 2.381697  |
| 30               | 1                | 0              | 0.791802                | 3.491873  | 2.040778  |
| 31               | 6                | 0              | 0.464612                | 3.710422  | -0.572494 |
| 32               | 1                | 0              | 1.360300                | 4.187761  | -0.162438 |
| 33               | 1                | 0              | 0.111217                | 4.332899  | -1.401185 |
| 34               | 7                | 0              | -0.563652               | 3.701522  | 0.468858  |
| 35               | 6                | 0              | -4.258226               | -1.123576 | 1.284269  |
| 36               | 6                | 0              | -2.888183               | -1.328417 | 1.412614  |
| 37               | 6                | 0              | -2.095664               | -1.658178 | 0.305702  |
| 38               | 6                | 0              | -2.728105               | -1.776080 | -0.940413 |
| 39               | 6                | 0              | -4.096463               | -1.574432 | -1.069978 |
| 40               | 6                | 0              | -4.870392               | -1.243014 | 0.040465  |
| 41               | 1                | 0              | -4.848256               | -0.870892 | 2.160764  |
| 42               | 1                | 0              | -2.418293               | -1.231732 | 2.388833  |
| 43               | 1                | 0              | -2.142750               | -2.019377 | -1.823672 |
| 44               | 1                | 0              | -4.562015               | -1.672146 | -2.046524 |
| 45               | 1                | 0              | -5.938714               | -1.081401 | -0.064690 |
| 46               | 6                | 0              | -0.635220               | -1.795062 | 0.475784  |
| 47               | 6                | 0              | 0.212177                | -2.499433 | -0.393479 |
| 48               | 1                | 0              | -0.292994               | -1.679992 | 1.505877  |
| 49               | 1                | 0              | 1.143386                | -2.920255 | -0.023287 |
| 50               | 1                | 0              | -0.187443               | -2.998184 | -1.274576 |

Zero-point correction= 0.438801 (Hartree/Particle)  
 Thermal correction to Energy= 0.461243  
 Thermal correction to Enthalpy= 0.462187  
 Thermal correction to Gibbs Free Energy= 0.385927  
 Sum of electronic and zero-point Energies= -2601.715692  
 Sum of electronic and thermal Energies= -2601.693250  
 Sum of electronic and thermal Enthalpies= -2601.692306  
 Sum of electronic and thermal Free Energies= -2601.768566  
 Sum of electronic and thermal Free Energies(343k)= -2601.780556

### TSS

| Center<br>Number | Atomic<br>Number | Atomic<br>Type | Coordinates (Angstroms) |           |           |
|------------------|------------------|----------------|-------------------------|-----------|-----------|
|                  |                  |                | X                       | Y         | Z         |
| 1                | 6                | 0              | -2.839937               | -0.099701 | -0.718470 |
| 2                | 8                | 0              | -2.412385               | -0.841956 | 0.179517  |
| 3                | 8                | 0              | -4.110256               | 0.331504  | -0.741162 |
| 4                | 6                | 0              | -1.980992               | 0.511542  | -1.706955 |

|    |    |   |           |           |           |
|----|----|---|-----------|-----------|-----------|
| 5  | 6  | 0 | -4.921414 | 0.006812  | 0.396710  |
| 6  | 1  | 0 | -5.947225 | 0.102852  | 0.034918  |
| 7  | 1  | 0 | -4.736989 | -1.029705 | 0.687492  |
| 8  | 1  | 0 | -1.259192 | -0.181530 | -2.142535 |
| 9  | 7  | 0 | 0.656911  | -1.378242 | 0.015749  |
| 10 | 6  | 0 | 2.095374  | -1.051206 | -0.139074 |
| 11 | 1  | 0 | 2.218586  | -0.525308 | -1.088924 |
| 12 | 1  | 0 | 2.365844  | -0.341527 | 0.647800  |
| 13 | 6  | 0 | 0.262602  | -2.321276 | -1.056237 |
| 14 | 1  | 0 | -0.809594 | -2.504663 | -0.949207 |
| 15 | 1  | 0 | 0.423766  | -1.815061 | -2.013995 |
| 16 | 6  | 0 | 0.460442  | -2.046251 | 1.326697  |
| 17 | 1  | 0 | -0.606738 | -2.259510 | 1.427637  |
| 18 | 1  | 0 | 0.731823  | -1.327534 | 2.105359  |
| 19 | 1  | 0 | -2.511306 | 1.056683  | -2.482978 |
| 20 | 29 | 0 | -0.459808 | 0.255703  | 0.036945  |
| 21 | 6  | 0 | -4.646544 | 0.959516  | 1.547325  |
| 22 | 1  | 0 | -4.815185 | 1.995328  | 1.237655  |
| 23 | 1  | 0 | -5.313094 | 0.736017  | 2.386909  |
| 24 | 1  | 0 | -3.612970 | 0.855286  | 1.888793  |
| 25 | 6  | 0 | 2.932500  | -2.358142 | -0.080921 |
| 26 | 1  | 0 | 3.479118  | -2.518072 | -1.016122 |
| 27 | 1  | 0 | 3.670607  | -2.318274 | 0.726526  |
| 28 | 6  | 0 | 1.333598  | -3.328881 | 1.396307  |
| 29 | 1  | 0 | 2.061635  | -3.266962 | 2.211739  |
| 30 | 1  | 0 | 0.717994  | -4.217130 | 1.572601  |
| 31 | 6  | 0 | 1.106974  | -3.620266 | -0.953842 |
| 32 | 1  | 0 | 0.469653  | -4.491803 | -0.771663 |
| 33 | 1  | 0 | 1.659627  | -3.805595 | -1.880739 |
| 34 | 7  | 0 | 2.067338  | -3.518773 | 0.144545  |
| 35 | 6  | 0 | 3.326319  | 2.803360  | 1.219193  |
| 36 | 6  | 0 | 1.952029  | 2.640720  | 1.316269  |
| 37 | 6  | 0 | 1.156630  | 2.349553  | 0.189493  |
| 38 | 6  | 0 | 1.827443  | 2.256257  | -1.046766 |
| 39 | 6  | 0 | 3.204951  | 2.422942  | -1.142173 |
| 40 | 6  | 0 | 3.972186  | 2.690823  | -0.012417 |
| 41 | 1  | 0 | 3.900823  | 3.023218  | 2.115733  |
| 42 | 1  | 0 | 1.467643  | 2.726432  | 2.286657  |
| 43 | 1  | 0 | 1.267565  | 2.032819  | -1.952341 |
| 44 | 1  | 0 | 3.683185  | 2.339290  | -2.115138 |
| 45 | 1  | 0 | 5.047531  | 2.818189  | -0.089522 |
| 46 | 6  | 0 | -0.287275 | 2.141639  | 0.345076  |
| 47 | 6  | 0 | -1.188433 | 2.103462  | -0.795025 |
| 48 | 1  | 0 | -0.722771 | 2.494304  | 1.277537  |
| 49 | 1  | 0 | -2.177130 | 2.505930  | -0.579234 |
| 50 | 1  | 0 | -0.806103 | 2.498249  | -1.736403 |

-----

Zero-point correction= 0.436608 (Hartree/Particle)  
 Thermal correction to Energy= 0.459149  
 Thermal correction to Enthalpy= 0.460093  
 Thermal correction to Gibbs Free Energy= 0.382410  
 Sum of electronic and zero-point Energies= -2601.649713  
 Sum of electronic and thermal Energies= -2601.627173  
 Sum of electronic and thermal Enthalpies= -2601.626228  
 Sum of electronic and thermal Free Energies= -2601.703912  
 Sum of electronic and thermal Free Energies(343k)= -2601.716112

## INT19

| Center<br>Number | Atomic<br>Number | Atomic<br>Type | Coordinates (Angstroms) |           |           |
|------------------|------------------|----------------|-------------------------|-----------|-----------|
|                  |                  |                | X                       | Y         | Z         |
| 1                | 6                | 0              | 2.642587                | 0.148890  | -0.976144 |
| 2                | 8                | 0              | 1.765458                | 0.879284  | -1.409576 |
| 3                | 8                | 0              | 3.674585                | 0.603752  | -0.259755 |
| 4                | 6                | 0              | 2.727391                | -1.334770 | -1.210416 |
| 5                | 6                | 0              | 3.640562                | 1.987739  | 0.119574  |
| 6                | 1                | 0              | 4.687432                | 2.266982  | 0.252035  |
| 7                | 1                | 0              | 3.211024                | 2.569945  | -0.698482 |
| 8                | 1                | 0              | 1.964588                | -1.575796 | -1.953489 |
| 9                | 7                | 0              | -0.967523               | 1.184376  | 0.165586  |
| 10               | 6                | 0              | -2.006944               | 1.137957  | 1.224273  |
| 11               | 1                | 0              | -2.267044               | 0.087062  | 1.375800  |
| 12               | 1                | 0              | -1.555092               | 1.508360  | 2.149579  |

|    |    |   |           |           |           |
|----|----|---|-----------|-----------|-----------|
| 13 | 6  | 0 | -1.554467 | 0.630675  | -1.087718 |
| 14 | 1  | 0 | -0.771360 | 0.655035  | -1.849235 |
| 15 | 1  | 0 | -1.806305 | -0.417010 | -0.897552 |
| 16 | 6  | 0 | -0.580334 | 2.595822  | -0.069309 |
| 17 | 1  | 0 | 0.213950  | 2.593154  | -0.818590 |
| 18 | 1  | 0 | -0.155516 | 2.978437  | 0.864254  |
| 19 | 1  | 0 | 3.710382  | -1.566607 | -1.636515 |
| 20 | 29 | 0 | 0.463262  | -0.047129 | 0.553049  |
| 21 | 6  | 0 | 2.840324  | 2.152183  | 1.398632  |
| 22 | 1  | 0 | 3.345738  | 1.677713  | 2.244144  |
| 23 | 1  | 0 | 2.680258  | 3.211143  | 1.624987  |
| 24 | 1  | 0 | 1.870961  | 1.655772  | 1.273544  |
| 25 | 6  | 0 | -3.230089 | 1.991475  | 0.790766  |
| 26 | 1  | 0 | -4.140965 | 1.384639  | 0.763184  |
| 27 | 1  | 0 | -3.405273 | 2.814829  | 1.491272  |
| 28 | 6  | 0 | -1.826299 | 3.410661  | -0.510809 |
| 29 | 1  | 0 | -2.017079 | 4.242282  | 0.175708  |
| 30 | 1  | 0 | -1.684629 | 3.835908  | -1.509789 |
| 31 | 6  | 0 | -2.796087 | 1.468074  | -1.492409 |
| 32 | 1  | 0 | -2.670047 | 1.903850  | -2.488910 |
| 33 | 1  | 0 | -3.697643 | 0.847449  | -1.515786 |
| 34 | 7  | 0 | -3.015999 | 2.559300  | -0.540596 |
| 35 | 6  | 0 | -2.359134 | -2.930502 | 1.004595  |
| 36 | 6  | 0 | -1.121010 | -2.421030 | 1.359614  |
| 37 | 6  | 0 | -0.024595 | -2.408796 | 0.465493  |
| 38 | 6  | 0 | -0.247923 | -3.002651 | -0.790294 |
| 39 | 6  | 0 | -1.495734 | -3.509030 | -1.151900 |
| 40 | 6  | 0 | -2.567700 | -3.468375 | -0.268763 |
| 41 | 1  | 0 | -3.170319 | -2.916576 | 1.728824  |
| 42 | 1  | 0 | -0.979474 | -2.001493 | 2.354732  |
| 43 | 1  | 0 | 0.564110  | -3.069083 | -1.507559 |
| 44 | 1  | 0 | -1.623197 | -3.949041 | -2.138053 |
| 45 | 1  | 0 | -3.538206 | -3.863900 | -0.552421 |
| 46 | 6  | 0 | 1.249196  | -1.748312 | 0.871912  |
| 47 | 6  | 0 | 2.513643  | -2.121546 | 0.102100  |
| 48 | 1  | 0 | 1.412422  | -1.931411 | 1.939629  |
| 49 | 1  | 0 | 3.379292  | -1.921561 | 0.742611  |
| 50 | 1  | 0 | 2.551380  | -3.194138 | -0.147789 |

-----  
Zero-point correction= 0.440468 (Hartree/Particle)  
Thermal correction to Energy= 0.462792  
Thermal correction to Enthalpy= 0.463737  
Thermal correction to Gibbs Free Energy= 0.387530  
Sum of electronic and zero-point Energies= -2601.703696  
Sum of electronic and thermal Energies= -2601.681372  
Sum of electronic and thermal Enthalpies= -2601.680427  
Sum of electronic and thermal Free Energies= -2601.756634  
Sum of electronic and thermal Free Energies(343k)= -2601.768609

### Styrene

| Center<br>Number | Atomic<br>Number | Atomic<br>Type | Coordinates (Angstroms) |           |           |
|------------------|------------------|----------------|-------------------------|-----------|-----------|
|                  |                  |                | X                       | Y         | Z         |
| 1                | 6                | 0              | -1.776931               | -1.042290 | 0.000118  |
| 2                | 6                | 0              | -0.406244               | -1.278264 | 0.000010  |
| 3                | 6                | 0              | 0.511408                | -0.221432 | -0.000103 |
| 4                | 6                | 0              | 0.010517                | 1.087375  | -0.000153 |
| 5                | 6                | 0              | -1.357198               | 1.326150  | -0.000060 |
| 6                | 6                | 0              | -2.258245               | 0.262705  | 0.000088  |
| 7                | 1                | 0              | -2.469280               | -1.879067 | 0.000224  |
| 8                | 1                | 0              | -0.036590               | -2.301072 | 0.000038  |
| 9                | 1                | 0              | 0.695495                | 1.930008  | -0.000290 |
| 10               | 1                | 0              | -1.724220               | 2.348508  | -0.000104 |
| 11               | 1                | 0              | -3.327490               | 0.452211  | 0.000158  |
| 12               | 6                | 0              | 1.953589                | -0.531004 | -0.000192 |
| 13               | 1                | 0              | 2.188317                | -1.595125 | -0.000654 |
| 14               | 6                | 0              | 2.966204                | 0.336896  | 0.000248  |
| 15               | 1                | 0              | 2.820643                | 1.413554  | 0.000776  |
| 16               | 1                | 0              | 3.994526                | -0.009827 | 0.000123  |

-----  
Zero-point correction= 0.134978 (Hartree/Particle)  
Thermal correction to Energy= 0.140876  
Thermal correction to Enthalpy= 0.141820

Thermal correction to Gibbs Free Energy= 0.105074  
 Sum of electronic and zero-point Energies= -309.401448  
 Sum of electronic and thermal Energies= -309.395551  
 Sum of electronic and thermal Enthalpies= -309.394606  
 Sum of electronic and thermal Free Energies= -309.431353  
 Sum of electronic and thermal Free Energies(343k)= -309.437040

## INT20

| Center<br>Number | Atomic<br>Number | Atomic<br>Type | Coordinates (Angstroms) |           |           |
|------------------|------------------|----------------|-------------------------|-----------|-----------|
|                  |                  |                | X                       | Y         | Z         |
| 1                | 6                | 0              | -2.466731               | -0.727450 | -0.897208 |
| 2                | 8                | 0              | -3.621238               | -1.111472 | -0.942014 |
| 3                | 8                | 0              | -2.087085               | 0.391879  | -0.233250 |
| 4                | 6                | 0              | -1.346755               | -1.391600 | -1.525113 |
| 5                | 6                | 0              | -3.129843               | 1.107752  | 0.437755  |
| 6                | 1                | 0              | -3.859553               | 1.451470  | -0.302340 |
| 7                | 1                | 0              | -3.648373               | 0.428992  | 1.122022  |
| 8                | 1                | 0              | -1.536586               | -2.315413 | -2.055609 |
| 9                | 6                | 0              | -2.478995               | 2.262585  | 1.169845  |
| 10               | 1                | 0              | -1.757142               | 1.898817  | 1.907767  |
| 11               | 1                | 0              | -1.955653               | 2.920530  | 0.469743  |
| 12               | 1                | 0              | -3.239926               | 2.849490  | 1.693200  |
| 13               | 1                | 0              | -0.343790               | -0.987082 | -1.460079 |
| 14               | 6                | 0              | 4.016919                | 0.272070  | -0.449220 |
| 15               | 6                | 0              | 3.314405                | -0.747650 | 0.184243  |
| 16               | 6                | 0              | 1.951447                | -0.615621 | 0.475478  |
| 17               | 6                | 0              | 1.306359                | 0.573834  | 0.105969  |
| 18               | 6                | 0              | 2.006926                | 1.591020  | -0.530270 |
| 19               | 6                | 0              | 3.364838                | 1.447174  | -0.808643 |
| 20               | 1                | 0              | 5.074540                | 0.146509  | -0.661704 |
| 21               | 1                | 0              | 3.830103                | -1.664140 | 0.461097  |
| 22               | 1                | 0              | 0.246087                | 0.703492  | 0.299984  |
| 23               | 1                | 0              | 1.487869                | 2.502893  | -0.811332 |
| 24               | 1                | 0              | 3.908481                | 2.245612  | -1.304888 |
| 25               | 6                | 0              | 1.256623                | -1.728708 | 1.148750  |
| 26               | 1                | 0              | 1.870051                | -2.613860 | 1.314970  |
| 27               | 6                | 0              | -0.012193               | -1.753796 | 1.562627  |
| 28               | 1                | 0              | -0.687390               | -0.912162 | 1.438698  |
| 29               | 1                | 0              | -0.420141               | -2.636069 | 2.045315  |

Zero-point correction= 0.243311 (Hartree/Particle)  
 Thermal correction to Energy= 0.258777  
 Thermal correction to Enthalpy= 0.259721  
 Thermal correction to Gibbs Free Energy= 0.196597  
 Sum of electronic and zero-point Energies= -616.245405  
 Sum of electronic and thermal Energies= -616.229938  
 Sum of electronic and thermal Enthalpies= -616.228994  
 Sum of electronic and thermal Free Energies= -616.292119  
 Sum of electronic and thermal Free Energies(343k)= -616.301952

## TS9

| Center<br>Number | Atomic<br>Number | Atomic<br>Type | Coordinates (Angstroms) |           |           |
|------------------|------------------|----------------|-------------------------|-----------|-----------|
|                  |                  |                | X                       | Y         | Z         |
| 1                | 6                | 0              | 2.478084                | -0.847244 | 0.488936  |
| 2                | 8                | 0              | 3.553435                | -1.308846 | 0.158590  |
| 3                | 8                | 0              | 2.160699                | 0.464221  | 0.335878  |
| 4                | 6                | 0              | 1.360974                | -1.601423 | 1.028778  |
| 5                | 6                | 0              | 3.177139                | 1.293835  | -0.234424 |
| 6                | 1                | 0              | 4.026486                | 1.341232  | 0.455034  |
| 7                | 1                | 0              | 3.533507                | 0.842109  | -1.165260 |
| 8                | 1                | 0              | 1.540825                | -2.641743 | 1.267194  |
| 9                | 6                | 0              | 2.563826                | 2.659287  | -0.465893 |
| 10               | 1                | 0              | 1.731407                | 2.595464  | -1.173725 |
| 11               | 1                | 0              | 2.189714                | 3.080725  | 0.471797  |
| 12               | 1                | 0              | 3.313681                | 3.342099  | -0.877234 |
| 13               | 1                | 0              | 0.572310                | -1.074566 | 1.551380  |
| 14               | 6                | 0              | -4.119658               | 0.283895  | 0.199271  |
| 15               | 6                | 0              | -3.330931               | -0.823236 | -0.086598 |
| 16               | 6                | 0              | -1.943068               | -0.698466 | -0.252149 |

|    |   |   |           |           |           |
|----|---|---|-----------|-----------|-----------|
| 17 | 6 | 0 | -1.364420 | 0.572678  | -0.095622 |
| 18 | 6 | 0 | -2.155046 | 1.677142  | 0.194243  |
| 19 | 6 | 0 | -3.534417 | 1.540140  | 0.338597  |
| 20 | 1 | 0 | -5.192514 | 0.165648  | 0.318586  |
| 21 | 1 | 0 | -3.792438 | -1.801942 | -0.193503 |
| 22 | 1 | 0 | -0.287404 | 0.693813  | -0.170905 |
| 23 | 1 | 0 | -1.689283 | 2.650458  | 0.318562  |
| 24 | 1 | 0 | -4.148083 | 2.406137  | 0.568192  |
| 25 | 6 | 0 | -1.144937 | -1.884496 | -0.554756 |
| 26 | 1 | 0 | -1.630852 | -2.843520 | -0.382137 |
| 27 | 6 | 0 | 0.153847  | -1.877038 | -0.960308 |
| 28 | 1 | 0 | 0.617211  | -0.965592 | -1.323818 |
| 29 | 1 | 0 | 0.654004  | -2.803755 | -1.220361 |

-----

Zero-point correction= 0.244080 (Hartree/Particle)  
 Thermal correction to Energy= 0.258162  
 Thermal correction to Enthalpy= 0.259107  
 Thermal correction to Gibbs Free Energy= 0.200294  
 Sum of electronic and zero-point Energies= -616.238586  
 Sum of electronic and thermal Energies= -616.224504  
 Sum of electronic and thermal Enthalpies= -616.223559  
 Sum of electronic and thermal Free Energies= -616.282372  
 Sum of electronic and thermal Free Energies(343k)= -616.291539

### INT21

-----

| Center<br>Number | Atomic<br>Number | Atomic<br>Type | Coordinates (Angstroms) |           |           |
|------------------|------------------|----------------|-------------------------|-----------|-----------|
|                  |                  |                | X                       | Y         | Z         |
| 1                | 6                | 0              | -2.409594               | -0.912142 | -0.490414 |
| 2                | 8                | 0              | -3.362882               | -1.605313 | -0.753643 |
| 3                | 8                | 0              | -2.512698               | 0.365183  | -0.078425 |
| 4                | 6                | 0              | -0.960839               | -1.333302 | -0.560874 |
| 5                | 6                | 0              | -3.844702               | 0.883141  | 0.044017  |
| 6                | 1                | 0              | -4.331139               | 0.844419  | -0.935523 |
| 7                | 1                | 0              | -4.416162               | 0.242120  | 0.722082  |
| 8                | 1                | 0              | -0.920006               | -2.333990 | -0.995344 |
| 9                | 6                | 0              | -3.731626               | 2.300277  | 0.564682  |
| 10               | 1                | 0              | -3.241966               | 2.316096  | 1.542726  |
| 11               | 1                | 0              | -3.150531               | 2.921756  | -0.122817 |
| 12               | 1                | 0              | -4.728346               | 2.739534  | 0.670061  |
| 13               | 1                | 0              | -0.433455               | -0.645858 | -1.231062 |
| 14               | 6                | 0              | 4.428618                | 0.106599  | -0.176123 |
| 15               | 6                | 0              | 3.504291                | -0.846862 | 0.209257  |
| 16               | 6                | 0              | 2.125139                | -0.530922 | 0.333668  |
| 17               | 6                | 0              | 1.735491                | 0.804726  | 0.044911  |
| 18               | 6                | 0              | 2.669927                | 1.751179  | -0.341082 |
| 19               | 6                | 0              | 4.020405                | 1.414288  | -0.455205 |
| 20               | 1                | 0              | 5.477084                | -0.163340 | -0.263889 |
| 21               | 1                | 0              | 3.828600                | -1.862335 | 0.422878  |
| 22               | 1                | 0              | 0.690570                | 1.090759  | 0.125404  |
| 23               | 1                | 0              | 2.346361                | 2.765661  | -0.556089 |
| 24               | 1                | 0              | 4.747080                | 2.161214  | -0.759041 |
| 25               | 6                | 0              | 1.200112                | -1.527904 | 0.727762  |
| 26               | 1                | 0              | 1.582640                | -2.530429 | 0.904111  |
| 27               | 6                | 0              | -0.275356               | -1.308678 | 0.827720  |
| 28               | 1                | 0              | -0.490406               | -0.345448 | 1.304496  |
| 29               | 1                | 0              | -0.726885               | -2.081513 | 1.458632  |

-----

Zero-point correction= 0.247993 (Hartree/Particle)  
 Thermal correction to Energy= 0.261738  
 Thermal correction to Enthalpy= 0.262682  
 Thermal correction to Gibbs Free Energy= 0.204439  
 Sum of electronic and zero-point Energies= -616.289599  
 Sum of electronic and thermal Energies= -616.275854  
 Sum of electronic and thermal Enthalpies= -616.274910  
 Sum of electronic and thermal Free Energies= -616.333153  
 Sum of electronic and thermal Free Energies(343k)= -616.342228

### INT22

-----

| Center<br>Number | Atomic<br>Number | Atomic<br>Type | Coordinates (Angstroms) |   |   |
|------------------|------------------|----------------|-------------------------|---|---|
|                  |                  |                | X                       | Y | Z |

|    |   |   |           |           |           |
|----|---|---|-----------|-----------|-----------|
| 1  | 6 | 0 | 3.390729  | -0.769072 | 0.208082  |
| 2  | 8 | 0 | 3.489209  | -1.609272 | 1.070992  |
| 3  | 8 | 0 | 4.442675  | -0.152061 | -0.352761 |
| 4  | 6 | 0 | 2.094038  | -0.258425 | -0.376643 |
| 5  | 6 | 0 | 5.733523  | -0.539702 | 0.139690  |
| 6  | 1 | 0 | 5.772651  | -0.359137 | 1.218296  |
| 7  | 1 | 0 | 5.867751  | -1.613762 | -0.021177 |
| 8  | 1 | 0 | 2.177125  | -0.283775 | -1.469671 |
| 9  | 1 | 0 | 2.001313  | 0.801421  | -0.110021 |
| 10 | 6 | 0 | -1.546663 | 3.083480  | -0.900880 |
| 11 | 6 | 0 | -1.200151 | 1.764507  | -1.182533 |
| 12 | 6 | 0 | -0.724347 | 0.921615  | -0.179837 |
| 13 | 6 | 0 | -0.600513 | 1.423551  | 1.117681  |
| 14 | 6 | 0 | -0.942779 | 2.739951  | 1.404530  |
| 15 | 6 | 0 | -1.418224 | 3.574277  | 0.394754  |
| 16 | 1 | 0 | -1.918900 | 3.726919  | -1.692780 |
| 17 | 1 | 0 | -1.316485 | 1.375403  | -2.190667 |
| 18 | 1 | 0 | -0.247397 | 0.776094  | 1.915807  |
| 19 | 1 | 0 | -0.840719 | 3.116655  | 2.418101  |
| 20 | 1 | 0 | -1.685303 | 4.603034  | 0.617743  |
| 21 | 6 | 0 | -0.414696 | -0.528582 | -0.495125 |
| 22 | 1 | 0 | -0.371402 | -0.650117 | -1.586650 |
| 23 | 6 | 0 | 0.886725  | -1.052398 | 0.108258  |
| 24 | 1 | 0 | 0.839634  | -1.024812 | 1.201326  |
| 25 | 1 | 0 | 0.993748  | -2.105786 | -0.165922 |
| 26 | 6 | 0 | -3.756269 | -1.179991 | -0.027770 |
| 27 | 8 | 0 | -2.571708 | -1.166242 | -0.838195 |
| 28 | 8 | 0 | -1.426385 | -1.399808 | -0.003758 |
| 29 | 6 | 0 | 6.766739  | 0.276405  | -0.608094 |
| 30 | 1 | 0 | 6.614163  | 1.345911  | -0.437075 |
| 31 | 1 | 0 | 7.770819  | 0.010215  | -0.263783 |
| 32 | 1 | 0 | 6.707144  | 0.086279  | -1.683580 |
| 33 | 6 | 0 | -4.847273 | -0.944405 | -1.071801 |
| 34 | 1 | 0 | -4.828548 | -1.729427 | -1.833526 |
| 35 | 1 | 0 | -5.829035 | -0.949664 | -0.588628 |
| 36 | 1 | 0 | -4.704689 | 0.023786  | -1.561599 |
| 37 | 6 | 0 | -3.738034 | -0.053972 | 1.004275  |
| 38 | 1 | 0 | -4.690605 | -0.030217 | 1.544710  |
| 39 | 1 | 0 | -2.934670 | -0.204608 | 1.729045  |
| 40 | 1 | 0 | -3.586002 | 0.914197  | 0.517607  |
| 41 | 6 | 0 | -3.915054 | -2.547711 | 0.636638  |
| 42 | 1 | 0 | -3.102650 | -2.728433 | 1.345316  |
| 43 | 1 | 0 | -4.865443 | -2.599234 | 1.178543  |
| 44 | 1 | 0 | -3.899346 | -3.339045 | -0.118984 |

Zero-point correction= 0.383894 (Hartree/Particle)  
 Thermal correction to Energy= 0.405213  
 Thermal correction to Enthalpy= 0.406158  
 Thermal correction to Gibbs Free Energy= 0.331811  
 Sum of electronic and zero-point Energies= -924.325273  
 Sum of electronic and thermal Energies= -924.303954  
 Sum of electronic and thermal Enthalpies= -924.303010  
 Sum of electronic and thermal Free Energies= -924.377357  
 Sum of electronic and thermal Free Energies(343k)= -924.389015
